# Supplementary material for: An expanded global inventory of allelic variation in the most extremely polymorphic region of Plasmodium falciparum merozoite surface protein 1 provided by short read sequence data
Source: Springer Nature journal article supplement (doi:10.1186/s12936-018-2475-2), 2018-10-01
Supplement: MOESM4 [file 16165324]

---

|       |          |                                                                                                                                                                        |
|-------|----------|------------------------------------------------------------------------------------------------------------------------------------------------------------------------|
|       | M32114   | aaaatggtattaAAGGATGGAGCAAATACTCAAGTTGTTGCAAAGCCAGTACCTGCTGTAAGTACTCAAAGTGCTAAAAATCCTCCAGGTGCTACAGTACCTTCAG<br>GTACTGCAAGTACTAAAGGTGCTATAAGATCTCCAGGTGCTGCAaatccttcagat |
|       | DQ485448 | aaaatggtattaAAGGATGGAGCAAATACTCAAGTTGTTGCAAAGCCTGCAGAAGCTGTAAGTACTCAAAGTGCTAAAAATCCTCCAGGTGCTACAGTACCTTCAG<br>GTACTGCAAGTACTAAAGGTGCTATAAGTTCTCCAGGTGCTGCAaatccttcagat |
| RO-33 | AB116598 | aaaatggtattaAAGGATGGAGCAAATACTCAAGTTGTTGCAAAGCCTGCAGGTGCTGTAAGTACTCAAAGTGCTAAAAATCCTCCAGGTGCTACAGTACCTTCAG<br>GTACTGCAAGTACTAAAGGTGCTATAAGATCTCCAGGTGCTGCAaatccttcagat |
|       | AB715486 | aaaatggtattaAAGGATGGAGCAAATACTCAAGTTGTTGCAAAGCCTGCAGGTGCTGTAAGTACTCAAAGTGCTAAAAATCCTCCAGGTGCTACAGTACCTTCAG<br>GTACTGCAAGTACTAAAGGTGCTATAAGATCTCCAGGTGCTGCAaatccttcagat |
|       | AB300614 | aaaatggtattaAAGGATGGAGCAAATACTCAAGTTGTTGCAAAGCCTGCAGATGCTGTAAGTACTCAAAGTGCTAAAAATCCTCCAGGTGCTACAGTACCTTCAG<br>GTACTGCAAGTACTAAAGGTGCTATAAGATCTCCAGGTGCTGCAaatccttcagat |

---
