# Supplementary material for: An expanded global inventory of allelic variation in the most extremely polymorphic region of Plasmodium falciparum merozoite surface protein 1 provided by short read sequence data
Source: Springer Nature journal article supplement (doi:10.1186/s12936-018-2475-2), 2018-10-01
Supplement: MOESM6 [file 16165324]

Additional file 6.

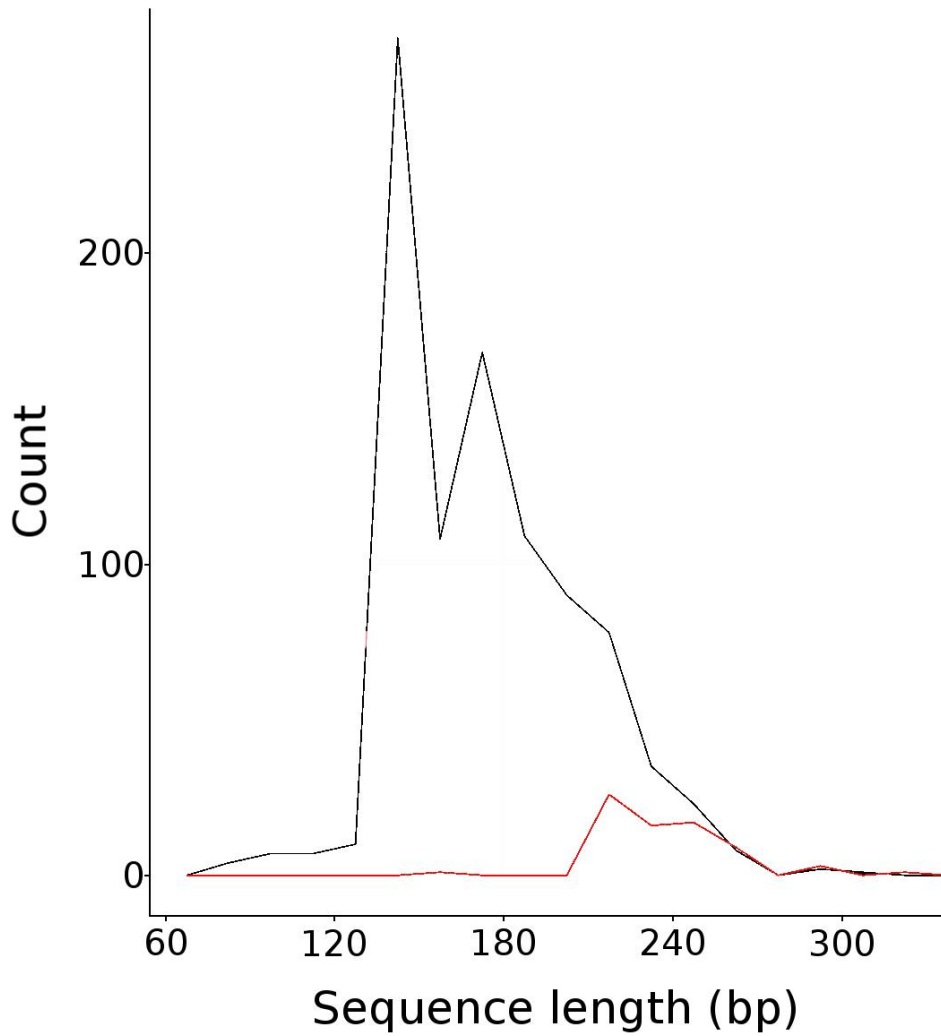

**Frequency distributions of length of *msp1* block 2 sequence for assembled and unassembled sequences.** Dummy reads created from 964 *msp1* block 2 sequences were assembled using Velvet. The frequency distributions of the lengths of the original *msp1* block 2 sequences are shown for successfully assembled (black line, n = 902) and unassembled (red line, n = 62) sequences are shown (sequences lengths are grouped with a bin width of 5 bp).
