# Supplementary material for: An expanded global inventory of allelic variation in the most extremely polymorphic region of Plasmodium falciparum merozoite surface protein 1 provided by short read sequence data
Source: Springer Nature journal article supplement (doi:10.1186/s12936-018-2475-2), 2018-10-01
Supplement: MOESM7 [file 16165324]

Additional file 7.

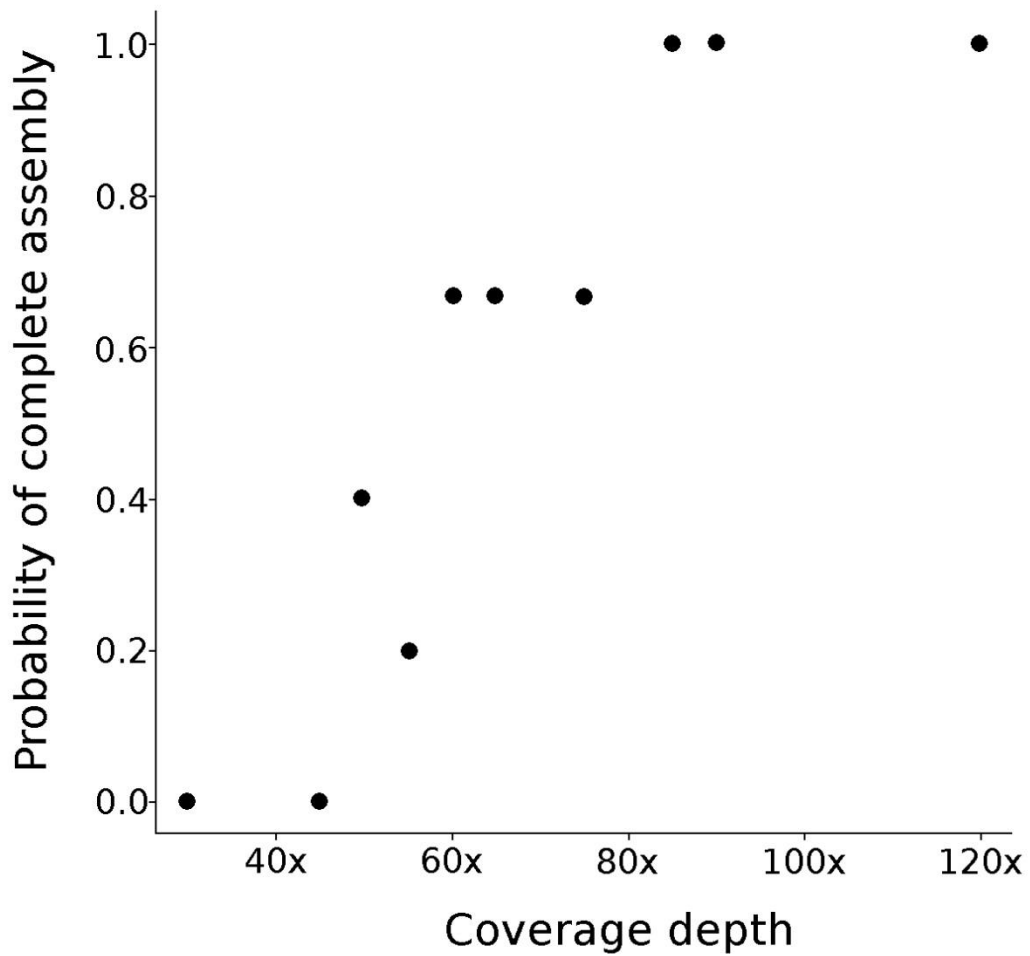

**Probability of complete assembly of *msp1* block 2 is dependent on depth of coverage.** Dummy reads were generated *in silico* from the Palo Alto allelic sequence of *msp1* block 2 at 10 different coverage depths. Reads were generated 10 times for each coverage depth and then assembled using Velvet, and the presence of the complete block 2 sequence was determined. The probability of assembling the whole *msp1* block 2 sequence is shown. There is a strong and significant correlation between coverage depth and the probability of complete assembly of the Palo Alto *msp1* block 2 sequence ( $\rho = 0.96$ ,  $p < 0.001$ ).
