# Supplementary material for: An expanded global inventory of allelic variation in the most extremely polymorphic region of Plasmodium falciparum merozoite surface protein 1 provided by short read sequence data
Source: Springer Nature journal article supplement (doi:10.1186/s12936-018-2475-2), 2018-10-01
Supplement: MOESM8 [file 16165324]

Additional file 8.

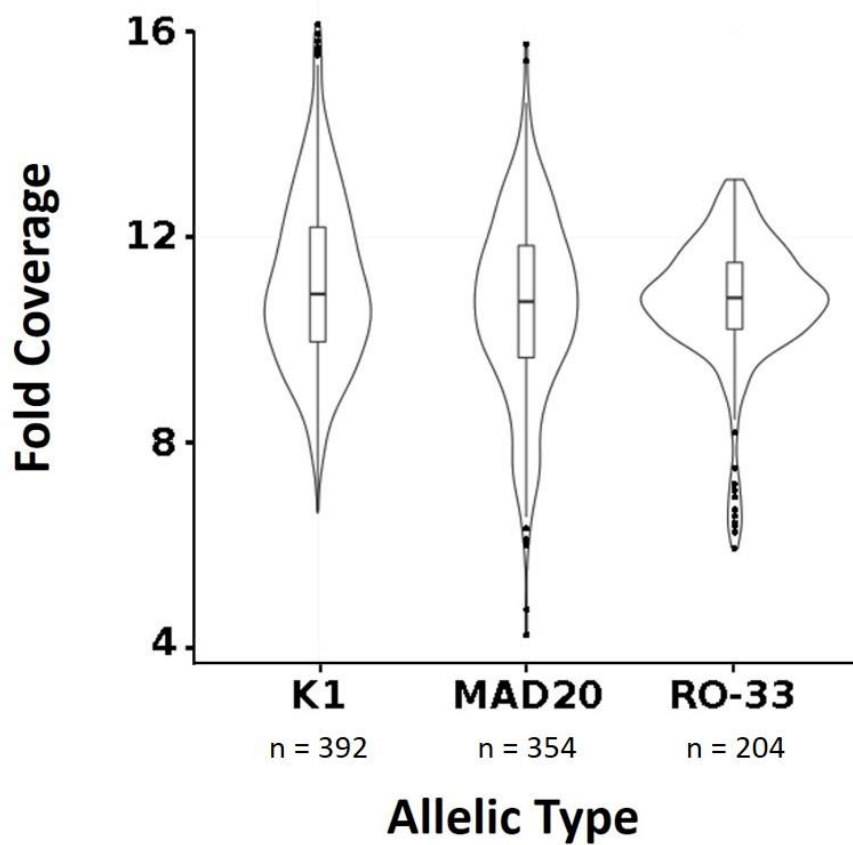

**Distribution of coverage by allelic type after alignment of dummy reads to reference library.** 100 bp dummy reads created from *msp1* block 2 long read sequences (Appendix files 1 and 2) were aligned to the reference library of 15 allelic sequences (Appendix file 4) using BWA-MEM. Coverage was calculated for each alignment and is shown for each major allelic type, showing no bias in the coverage among the types.
