# Supplementary material for: An expanded global inventory of allelic variation in the most extremely polymorphic region of Plasmodium falciparum merozoite surface protein 1 provided by short read sequence data
Source: Malar J. 2018 Oct 1;17:345. doi: 10.1186/s12936-018-2475-2 (PMC6167803; doi:10.1186/s12936-018-2475-2)
Supplement: Supplementary file 2 — Additional file 2. DNA sequences from GenBank used as a starting point to generate the P. falciparum msp1 block 2 reference library. [file 12936_2018_2475_MOESM2_ESM.fa]

>AB116596.1 Plasmodium falciparum msp1 gene for merozoite surface protein 1, complete cds, isolate:97S325-14
ATGAAGATCATATTCTTTTTATGTTCATTTCTTTTTTTTATTATAAATACACAATGTGTAACACATGAAA
GTTATCAAGAACTTGTCAAAAAACTAGAAGCTTTAGAAGATGCAGTATTGACAGGTTATGGTTTATTTCA
TAAGGAAAAAATGATCTTAAATGAAGAAGAAATTACTACAAAAGGTGCAAGTGCTCAAAGTGGTACAAGT
GGTACAAGTGGTACAAGTGGTACAAGTGGTACAAGTGGTACAAGTGGTCCAAGTGGTCCAAGTGGTACAA
GTCCATCATCTCGTTCAAACACTTTACCTCGTTCAAATACTTCATCTGGTGCAAGCCCTCCAGCTGATGC
AAGCGATTCAGATGCTAAATCTTACGCTGATTTAAAACACAGAGTACGAAATTACTTGTTCACTATTAAA
GAACTCAAATATCCCGAACTCTTTGATTTAACCAATCATATGTTAACTTTGTGTGATAATATTCATGGTT
TCAAATATTTAATTGATGGATATGAAGAAATTAATGAATTATTATATAAATTAAACTTTTATTTTGATTT
ATTAAGAGCAAAATTAAATGATGTATGTGCTAATGATTATTGTCAAATACCTTTCAATCTTAAAATTCGT
GCAAATGAATTAGACGTACTTAAAAAACTTGTGTTCGGATATAGAAAACCATTAGACAATATTAAAGATA
ATGTAGGAAAAATGGAAGATTACATTAAAAAAAATAAAACAACCATAGCAAATATAAATGAATTAATTGA
AGGAAGTAAGAAAACAATTGATCAAAATAAGAATGCAGATAATGAAGAAGGAAAAAAAAAATTATACCAA
GCTCAATATAATCTTTTTATTTACAATAAACAATTACAAGAAGCACATAATTTAATAAGCGTTTTAGAAA
AACGTATTGACACTTTAAAAAAAAATGAAAACATAAAGAAATTACTTGAAGATATAGATAAAATTAAAAC
AGATGCCGAAAAACCCACTACTGGAAGTAAACCAAATACTCTCCTTGATAAGAACAAAAAAATCGAGGAA
CACGAAGAAAAAATAAAAGAAATTGCCAAAACTATTAAATTTAACATTGATAGTTTATTTACTGATCCAC
TTGAATTAGAATATTATTTAAGAGAAAAAAATAAAAAAGTTGATGTAACACCTAAATCACAAGATCCTAC
GAAATCTGTTCAAATACCAAAAGTTCCTTATCCAAATGGTATTGTATATCCTTTACCACTCACTGATATT
CATAATTCATTAGCTGCAGATAATGATAAAAATTCATATGGTGATTTAATGAATCCTGATACTAAAGAAA
AAATTAATGAAAAAATTATTACAGATAATAAGGAAAGAAAAATATTCATTAATAACATTAAAAAACAAAT
TGATTTAGAAGAAAAAAACATTAATCACACAAAAGAACAAAATAAAAAATTACTTGAAGATTATGAAAAG
TCAAAAAAGGATTATGAAGAATTACTTGAAAAATTTTATGAAATGAAATTTAATAATAATTTTAACAAAG
ATGTCGTAGATAAAATGTTCAGTGCAAGATATACATATAATGTTGAAAAACAAAGATATAATAATAAATT
TTCATCCTCTAATAATTCTGTATATAATGTTCAAAAATTAAAAAAGGCTCTTTCATATCTTGAAGATTAT
TCTTTAAGAAAAGGAATTTCTGAAAAAGATTTTAATCATTATTATACTTTGAAAACTGGCCTCGAAGCTG
ATATAAAAAAATTAACAGAAGAAATAAAGAGTAGTGAAAACAAAATTCTAGAAAAAAATTTTAAAGGACT
AACACATTCAGCAAATGCTTCCTTAGAAGTATCTGATATTGTAAAATTACAAGTACAAAAAGTTTTATTA
ATTAAAAAAATAGAAGACTTAAGAAAGATAGAATTATTTTTAAAAAATGCACAACTAAAAGATAGTATTC
ATGTACCAAATATTTATAAACCACAAAATAAACCAGAACCATATTATTTAATTGTATTAAAAAAAGAAGT
AGATAAATTAAAAGAATTTATACCAAAAGTAAAAGACATGTTAAAGAAAGAACAAGCTGTCTTATCAAGT
ATTACACAACCTTTAGTTGCAGCAAGCGAAACAACTGAAGATGGGGGTCACTCCACACACACATTATCCC
AATCAGGAGAAACAGAAGTAACAGAAGAAACAGTAGGACACACAACAACGGTAACAATAACATTACCACC
AACACAACCATCACCACCAAAAGAAGTAAAAGTTGTTGAAAATTCAATAGAACATAAGAGTAATGACAAT
TCACAAGCCTTGACAAAAACAGTTTATCTAAAGAAATTAGATGAATTTTTAACTAAATCATATATATGTC
ATAAATATATTTTAGTATCAAACTCTAGTATGGACCAAAAATTATTAGAGGTATATAATCTTACTCCAGA
AGAAAAAAATGAATTAAAATCATGTGATCCATTAGATTTATTATTTAATATTCAAAATAACATACCTGCT
ATGTATTCATTATATGATAGTATGAACAATGATTTACAACATCTCTTTTTTGAATTATATCAAAAGGAAA
TGATTTATTATTTACATAAACTAAAAGAGGAAAATCACATCAAAAAATTATTAGAGGAGCAAAAACAAAT
AACTGGAACATCATCTACATCCAGTCCTGGAAATACAACCGTAAATACTGCTCAATCCGCAACTCACAGT
AATTCCCAAAACCAACAATCAAATGCATCCTCTACCAATACCCAAAATGGTGTAGCTGTATCATCTGGTC
CTGCTGTAGTTGAAGAAAGTCATGATCCCTTAACAGTATTGTCTATTAGTAACGATTTGAAAGGTATTGT
TAGTCTCTTAAATCTTGGAAATAAAACTAAAGTACCTAATCCATTAACCATTTCTACAACAGAGATGGAA
AAATTTTATGAGAATATTTTAAAAAATAATGATACCTATTTTAATGATGATATCAAACAATTCGTAAAAT
CTAATTCAAAAGTAATTACAGGTTTGACCGAAACACAAAAAAATGCATTAAATGATGAAATTAAAAAATT
AAAAGATACTTTACAGTTATCATTTGATTTATATAATAAATATAAATTAAAATTAGATAGATTATTTAAT
AAGAAAAAAGAACTTGGCCAAGACAAAATGCAAATTAAAAAACTTACTTTATTAAAAGAACAATTAGAAT
CAAAATTGAATTCACTTAATAACCCACATAATGTATTACAAAACTTTTCTGTTTTCTTTAACAAAAAAAA
AGAAGCTGAAATAGCAGAAACTGAAAACACATTAGAAAACACAAAAATATTATTGAAACATTATAAAGGA
CTTGTTAAATATTATAATGGTGAATCATCTCCATTAAAAACTTTAAGTGAAGTATCAATTCAAACAGAAG
ATAATTATGCCAATTTAGAAAAATTTAGAGTATTAAGTAAAATAGATGGAAAACTCAATGATAATTTACA
TTTAGGAAAGAAAAAATTATCTTTCTTATCAAGTGGATTACATCATTTAATTACTGAATTAAAAGAAGTA
ATAAAAAATAAAAATTATACAGGTAATTCTCCAAGTGAAAATAATAAGAAAGTTAACGAAGCTTTAAAAT
CTTACGAAAATTTTCTCCCAGAAGCAAAAGTTACAACAGTTGTAACTCCACCTCAACCAGATGTAACTCC
ATCTCCATTATCTGTAAGGGTAAGTGGTAGTTCAGGATCCACAAAAGAAGAAACACAAATACCAACTTCA
GGCTCTTTATTAACAGAATTACAACAAGTAGTACAATTACAAAATTATGACGAAGAAGATGATTCCTTAG
TTGTATTACCCATTTTTGGAGAATCCGAAGATAATGACGAATATTTAGATCAAGTAGTAACTGGAGAAGC
AATATCTGTCACAATGGATAATATCCTCTCAGGATTTGAAAATGAATATGATGTTATATATTTAAAACCT
TTAGCTGGAGTATATAGAAGCTTAAAAAAACAAATTGAAAAAAACATTATTACATTTAATTTAAATTTGA
ACGATATCTTAAATTCACGTCTTAAGAAACGAAAATATTTCTTAGATGTATTAGAATCTGATTTAATGCA
ATTTAAACATATATCCTCAAATGAATACATTATTGAAGATTCATTTAAATTATTGAATTCAGAACAAAAA
AACACACTTTTAAAAAGTTACAAATATATAAAAGAATCAGTAGAAAATGATATTAAATTTGCACAGGAAG
GTATAAGTTATTATGAAAAGGTTTTAGCGAAATATAAGGATGATTTAGAATCAATTAAAAAAGTTATCAA
AGAAGAAAAGGAGTTCCCATCATCACCACCAACAACACCTCCGTCACCAGCAAAAACAGACGAACAAAAG
AAGGAAAGTAAGTTCCTTCCATTTTTAACAAACATTGAGACCTTATACAATAACTTAGTTAATAAAATTG
ACGATTACTTAATTAACTTAAAGGCAAAGATTAACGATTGTAATGTTGAAAAAGATGAAGCACATGTTAA
AATAACTAAACTTAGTGATTTAAAAGCAATTGATGACAAAATAGATCTTTTTAAAAACACTAACGACTTC
GAAGCAATTAAAAAATTGATAAATGATGATACGAAAAAAGATATGCTTGGCAAATTACTTAGTACAGGAT
TAGTTCAAAATTTTCCTAATACAATAATATCAAAATTAATTGAAGGAAAATTCCAAGATATGTTAAACAT
TTCACAACACCAATGCGTAAAAAAACAATGTCCAGAAAATTCTGGATGTTTCAGACATTTAGATGAAAGA
GAAGAATGTAAATGTTTATTAAATTACAAACAAGAAGGTGATAAATGTGTTGAAAATCCAAATCCTACTT
GTAACGAAAATAATGGTGGATGTGATGCAGATGCCAAATGTACCGAAGAAGATTCAGGTAGCAACGGAAA
GAAAATCACATGTGAATGTACTAAACCTGATTCTTATCCACTTTTCGATGGTATTTTCTGCAGTTCCTCT
AACTTCTTAGGAATATCATTCTTATTAATACTCATGTTAATATTATACAGTTTCATTTAA

>AB116597.1 Plasmodium falciparum msp1 gene for merozoite surface protein 1, complete cds, isolate:97S304-19
ATGAAGATCATATTCTTTTTATGTTCATTTCTTTTTTTTATTATAAATACACAATGTGTAACACATGAAA
GTTATCAAGAACTTGTCAAAAAACTAGAAGCTTTAGAAGATGCAGTATTGACAGGTTATAGTTTATTTCA
AAAGGAAAAAATGGTATTAAATGAAGGAACAAGTGGAACAGCTGTTACAACTAGTACACCTGGTTCAAGT
GGTTCAGTTACTTCAGGTGGTTCAGGTGGTTCAGTTGCTTCAGGTGGTTCAGGTGGCTCAGTTGCTTCAG
GTGGTTCAGGTGGCTCAGTTGCTTCAGGTGGTTCAGGTAATTCAAGACGTACAAATCCTTCAGATAATTC
AAGTGATTCAGATGCTAAATCTTACGCTGATTTAAAACATAGAGTTCAAAATTACTTGTTCACTATTAAA
GAACTCAAATATCCCGAACTCTTTGATTTAACCAATCATATGTTGACTTTATCTAAAAATGTTGATGGTT
TCAAATATTTAATTGATGGATATGAAGAAATTAATGAATTATTATATAAATTAAACTTTTATTATGATTT
ATTAAGAGCCAAATTAAATGATGCATGTGCCAATAGTTATTGTCAAATACCTTTCAATCTTAAAATTCGT
GCAAATGAATTAGACGTACTTAAAAAAATTGTGTTCGGATATAGAAAACCATTAGACAATATTAAAGATA
ATGTAGGAAAAATGGAAGATTACATTAAAAAAAATAAAACAACCATAGCAAATATAAATGAATTAATTGA
AGGAAGTAAGAAAACAATTGATCAAAATAAGAATGCAGATAATGAAGAAGGAAAAAAAAAATTATACCAA
GCTCAATATAATCTTTTTATTTACAATAAACAATTACAAGAAGCACATAATTTAATAAGCGTTTTAGAAA
AACGTATTGACACTTTAAAAAAAAATGAAAACATAAAGAAATTACTTGAAGATATAGATAAAATTAAAAC
AGATGCCGAAAAACCCACTACTGGAAGTAAACCAAATCCTCTCCCTGAGAATAAGAAAAAAGAAGTCGAG
GGACACGAAGAAAAAATAAAAGAAATTGCCAAAACTATTAAATTTAACATTGATAGTTTATTTACTGATC
CACTTGAATTAGAATATTATTTAAGAGAAAAAAATAAAAAAGTTGATGTAACACCTAAATCACAAGATCC
TACGAAATCTGTTCAAATACCAAAAGTTCCTTATCCAAATGGTATTGTATATCCTTTACCACTCACTGAT
ATTCATAATTCATTAGCTGCAGATAATGATAAAAATTCATATGGTGATTTAATGAATCCTGATACTAAAG
AAAAAATTAATGAAAAAATTATTACAGATAATAAGGAAAGAAAAATATTCATTAATAACATTAAAAAACA
AATTGATTTAGAAGAAAAAAACATTAATCACACAAAAGAACAAAATAAAAAATTACTTGAAGATTATGAA
AAGTCAAAAAAGGATTATGAAGAATTACTTGAAAAATTTTATGAAATGAAATTTAATAATAATTTTAACA
AAGATGTCGTAGATAAAATGTTCAGTGCAAGATATACATATAATGTTGAAAAACAAAGATATAATAATAA
ATTTTCATCCTCTAATAATTCTGTATATAATGTTCAAAAATTAAAAAAGGCTCTTTCATATCTTGAAGAT
TATTCTTTAAGAAAAGGAATTTCTGAAAAAGATTTTAATCATTATTATACTTTGAAAACTGGCCTCGAAG
CTGATATAAAAAAATTAACAGAAGAAATAAAGAGTAGTGAAAACAAAATTCGAGAAAAAAATTTTAAAGG
ACTAACACATTCAGCAAATGCTTCCTTAGAAGTATCTGATATTGTAAAATTACAAGTACAAAAAGTTTTA
TTAATTAAAAAAATAGAAGACTTAAGAAAGATAGAATTATTTTTAAAAAATGCACAACTAAAAGATAGTA
TTCATGTACCAAATATTTATAAACCACAAAATAAACCAGAACCATATTATTTAATTGTATTAAAAAAAGA
AGTAGATAAATTAAAAGAATTTATACCAAAAGTAAAAGACATGTTAAAGAAAGAACAAGCTGTCTTATCA
AGTATTACACAACCTTTAGTTGCAGCAAGCGAAACAACTGAAGATGGGGGTCACTCCACACACACATTAT
CCCAATCAGGAGAAACAGAAGTAACAGAAGAAACAGTAGGACACACAACAACGGTAACAATAACATTACC
ACCAAAAGAAGAATCAGCACCAAAAGAAGTAAAAGTTGTTGAAAATTCAATAGAACATAAGAGTAATGAC
AATTCACAAGCCTTGACAAAAACAGTTTATCTAAAGAAATTAGATGAATTTTTAACTAAATCATATATAT
GTCATAAATATATTTTAGTATCAAACTCTAGTATGGACCAAAAATTATTAGAGGTATATAATCTTACTCC
AGAAGAAAAAAATGAATTAAAATCATGTGATCCATTAGATTTATTATTTAATATTCAAAATAACATACCT
GCTATGTATTCATTATATGATAGTATGAACAATGATTTACAACATCTCTTTTTTGAATTATATCAAAAGG
AAATGATTTATTATTTACATAAACTAAAAGAGGAAAATCACATCAAAAAATTATTAGAGGAGCAAAAACA
AATAACTGGAACATCATCTACATCCAGTCCTGGAAATACAACCGTAAATACTGCTCAATCCGCAACTCAC
AGTAATTCCCAAAACCAACAATCAAATGCATCCTCTACCAATACCCAAAATGGTGTAGCTGTATCATCTG
GTCCTGCTGTAGTTGAAGAAAGTCATGATCCCTTAACAGTATTGTCTATTAGTAACGATTTGAAAGGTAT
TGTTAGTCTCTTAAATCTTGGAAATAAAACTAAAGTACCTAATCCATTAACCATTTCTACAACAGAGATG
GAAAAATTTTATGAGAATATTTTAAAAAATAATGATACCTATTTTAATGATGATATCAAACAATTCGTAA
AATCTAATTCAAAAGTAATTACAGGTTTGACCGAAACACAAAAAAATGCATTAAATGATGAAATTAAAAA
ATTAAAAGATACTTTACAGTTATCATTTGATTTATATAATAAATATAAATTAAAATTAGATAGATTATTT
AATAAGAAAAAAGAACTTGGCCAAGACAAAATGCAAATTAAAAAACTTACTTTATTAAAAGAACAATTAG
AATCAAAATTGAATTCACTTAATAACCCACATAATGTATTACAAAACTTTTCTGTTTTCTTTAACAAAAA
AAAAGAAGCTGAAATAGCAGAAACTGAAAACACATTAGAAAACACAAAAATATTATTGAAACATTATAAA
GGACTTGTTAAATATTATAATGGTGAATCATCTCCATTAAAAACTTTAAGTGAAGTATCAATTCAAACAG
AAGATAATTATGCCAATTTAGAAAAATTTAGAGCATTAAGTAAAATAGATGGAAAACTCAATGATAATTT
ACATTTAGGAAAGAAAAAATTATCTTTCTTATCAAGTGGATTACATCATTTAATTACTGAATTAAAAGAA
GTAATAAAAAATAAAAATTATACAGGTAATTCTCCAAGTGAAAATAATAAGAAAGTTAACGAAGCTTTAA
AATCTTACGAAAATTTTCTCCCAGAAGCAAAAGTTACAACAGTTGTAACTCCACCTCAACCAGATGTAAC
TCCATCTCCATTATCTGTAAGGGTAAGTGGTAGTTCAGGATCCACAAAAGAAGAAACACAAATACCAACT
TCAGGCTCTTTATTAACAGAATTACAACAAGTAGTACAATTACAAAATTATGACGAAGAAGATGATTCCT
TAGTTGTATTACCCATTTTTGGAGAATCCGAAGATAATGACGAATATTTAGATCAAGTAGTAACTGGAGA
AGCAATATCTGTCACAATGGATAATATCCTCTCAGGATTTGAAAATGAATATGATGTTATATATTTAAAA
CCTTTAGCTGGAGTATATAGAAGCTTAAAAAAACAAATTGAAAAAAACATTATTACATTTAATTTAAATT
TGAACGATATCTTAAATTCACGTCTTAAGAAACGAAAATATTTCTTAGATGTATTAGAATCTGATTTAAT
GCAATTTAAACATATATCCTCAAATGAATACATTATTGAAGATTCATTTAAATTATTGAATTCAGAACAA
AAAAACACACTTTTAAAAAGTTACAAATATATAAAAGAATCAGTAGAAAATGATATTAAATTTGCACAGG
AAGGTATAAGTTATTATGAAAAGGTTTTAGCGAAATATAAGGATGATTTAGAATCAATTAAAAAAGTTAT
CAAAGAAGAAAAGGAGTTCCCATCATCACCACCAACAACACCTCCGTCACCAGCAAAAACAGACGAACAA
AAGAAGGAAAGTAAGTTCCTTCCATTTTTAACAAACATTGAGACCTTATACAATAACTTAGTTAATAAAA
TTGACGATTACTTAATTAACTTAAAGGCAAAGATTAACGATTGTAATGTTGAAAAAGATGAAGCACATGT
TAAAATAACTAAACTTAGTGATTTAAAAGCAATTGATGACAAAATAGATCTTTTTAAAAACACTAACGAC
TTCGAAGCAATTAAAAAATTGATAAATGATGATACGAAAAAAGATATGCTTGGCAAATTACTTAGTACAG
GATTAGTTCAAAATTTTCCTAATACAATAATATCAAAATTAATTGAAGGAAAATTCCAAGATATGTTAAA
CATTTCACAACACCAATGCGTAAAAAAACAATGTCCAGAAAATTCTGGATGTTTCAGACATTTAGATGAA
AGAGAAGAATGTAAATGTTTATTAAATTACAAACAAGAAGGTGATAAATGTGTTGAAAATCCAAATCCTA
CTTGTAACGAAAATAATGGTGGATGTGATGCAGATGCCACATGTACCGAAGAAGATTCAGGTAGCAGCAG
AAAGAAAATCACATGTGAATGTACTAAACCTGATTCTTATCCACTTTTCGATGGTATTTTCTGCAGTTCC
TCTAACTTCTTAGGAATATCATTCTTATTAATACTCATGTTAATATTATACAGTTTCATTTAA

>AB116598.1 Plasmodium falciparum msp1 gene for merozoite surface protein 1, complete cds, isolate:97S304-57
ATGAAGATCATATTCTTTTTATGTTCATTTCTTTTTTTTATTATAAATACACAATGTGTAACACATGAAA
GTTATCAAGAACTTGTCAAAAAACTAGAAGCTTTAGAAGATGCAGTATTGACAGGTTATAGTTTATTTCA
AAAGGAAAAAATGGTATTAAAGGATGGAGCAAATACTCAAGTTGTTGCAAAGCCTGCAGGTGCTGTAAGT
ACTCAAAGTGCTAAAAATCCTCCAGGTGCTACAGTACCTTCAGGTACTGCAAGTACTAAAGGTGCTATAA
GATCTCCAGGTGCTGCAAATCCTTCAGATGATTCAAGTGATTCAAATACTAAAACTTACGCTGATTTAAA
ACATAGAGTTCAAAATTACTTGTTCACTATTAAAGAACTCAAATATCCCGAACTCTTTGATTTAACCAAT
CATATGTTGACTTTATCTAAAAATGTTGATGGTTTCAAATATTTAATTGATGGATATGAAGAAATTAATG
AATTATTATATAAATTAAACTTTTATTATGATTTATTAAGAGCCAAATTAAATGATGCATGTGCCAATAG
TTATTGTCAAATACCTTTCAATCTTAAAATTCGTGCAAATGAATTAGACGTACTTAAAAAAATTGTGTTC
GGATATAGAAAACCATTAGACAATATTAAAGATAATGTAGGAAAAATGGAAGATTACATTAAAAAAAATA
AAACAACCATAGCAAATATAAATGAATTAATTGAAGGAAGTAAGAAAACAATTGATCAAAATAAGAATGC
AGATAATGAAGAAGGAAAAAAAAAATTATACCAAGCTCAATATAATCTTTTTATTTACAATAAACAATTA
CAAGAAGCACATAATTTAATAAGCGTTTTAGAAAAACGTATTGACACTTTAAAAAAAAATGAAAACATAA
AGAAATTACTTGAAGATATAGATAAAATTAAAACAGATGCCGAAAAACCCACTACTGGAAGTAAACCAAA
TACTCTCCTTGATAAGAACAAAAAAATCGAGGAACACGAAGAAAAAATAAAAGAAATTGCCAAAACTATT
AAATTTAACATTGATAGTTTATTTACTGATCCACTTGAATTAGAATATTATTTAAGAGAAAAAAATAAAA
AAGTTGATGTAACACCTAAATCACAAGATCCTACGAAATCTGTTCAAATACCAAAAGTTCCTTATCCAAA
TGGTATTGTATATCCTTTACCACTCACTGATATTCATAATTCATTAGCTGCAGATAATGATAAAAATTCA
TATGGTGATTTAATGAATCCTGATACTAAAGAAAAAATTAATGAAAAAATTATTACAGATAATAAGGAAA
GAAAAATATTCATTAATAACATTAAAAAACAAATTGATTTAGAAGAAAAAAACATTAATCACACAAAAGA
ACAAAATAAAAAATTACTTGAAGATTATGAAAAGTCAAAAAAGGATTATGAAGAATTACTTGAAAAATTT
TATGAAATGAAATTTAATAATAATTTTGACAAAGATGTCGTAGTTAAAATATTCAGTGCAAGATATACAT
ATAATGTTGAAAAACAAAGATATAATAATAAATTTTCATCCTCTAATAATTCTGTATATAATGTTCAAAA
ATTAAAAAAGGCTCTTTCATATCTTGAAGATTATTCTTTAAGAAAAGGAATTTCTGAAAAAGATTTTAAT
CATTATTATACTTTGAAAACTGGCCTCGAAGCTGATATAAAAAAATTAACAGAAGAAATAAAGAGTAGTG
AAAACAAAATTCTAGAAAAAAATTTTAAAGGACTAACACATTCAGCAAATGCTTCCTTAGAAGTATCTGA
TATTGTAAAATTACAAGTACAAAAAGTTTTATTAATTAAAAAAATAGAAGACTTAAGAAAGATAGAATTA
TTTTTAAAAAATGCACAACTAAAAGATAGTATTCATGTACCAAATATTTATAAACCACAAAATAAACCAG
AACCATATTATTTAATTGTATTAAAAAAAGAAGTAGATAAATTAAAAGAATTTATACCAAAAGTAAAAGA
CATGTTAAAGAAAGAACAAGCTGTCTTATCAAGTATTACACAACCTTTAGTTGCAGCAAGCGAAACAACT
GAAGATGGGGGTCACTCCACACACACATTATCCCAATCAGGAGAAACAGAAGTAACAGAAGAAACAGAAG
TAACAGAAGAAACAGTAGGACACACAACAACGGTAACAATAACATTACCACCAAAAGAAGAATCAGCACC
AAAAGAAGTAAAAGTTGTTGAAAATTCAATAGAACATAAGAGTAATGACAATTCACAAGCCTTGACAAAA
ACAGTTTATCTAAAGAAATTAGATGAATTTTTAACTAAATCATATATATGTCATAAATATATTTTAGTAT
CAAACTCTAGTATGGACCAAAAATTATTAGAGGTATATAATCTTACTCCAGAAGAAAAAAATGAATTAAA
ATCATGTGATCCATTAGATTTATTATTTAATATTCAAAATAACATACCTGCTATGTATTCATTATATGAT
AGTATGAACAATGATTTACAACATCTCTTTTTTGAATTATATCAAAAGGAAATGATTTATTATTTACATA
AACTAAAAGAGGAAAATCACATCAAAAAATTATTAGAGGAGCAAAAACAAATAACTGGAACATCATCTAC
ATCCAGTCCTGGAAATACAACCGTAAATACTGCTCAATCCGCAACTCACAGTAATTCCCAAAACCAACAA
TCAAATGCATCCTCTACCAATACCCAAAATGGTGTAGCTGTATCATCTGGTCCTGCTGTAGTTGAAGAAA
GTCATGATCCCTTAACAGTATTGTCTATTAGTAACGATTTGAAAGGTATTGTTAGTCTCTTAAATCTTGG
AAATAAAACTAAAGTACCTAATCCATTAACCATTTCTACAACAGAGATGGAAAAATTTTATGAGAATATT
TTAAAAAATAATGATACCTATTTTAATGATGATATCAAACAATTCGTAAAATCTAATTCAAAAGTAATTA
CAGGTTTGACCGAAACACAAAAAAATGCATTAAATGATGAAATTAAAAAATTAAAAGATACTTTACAGTT
ATCATTTGATTTATATAATAAATATAAATTAAAATTAGATAGATTATTTAATAAGAAAAAAGAACTTGGC
CAAGACAAAATGCAAATTAAAAAACTTACTTTATTAAAAGAACAATTAGAATCAAAATTGAATTCACTTA
ATAACCCACATAATGTATTACAAAACTTTTCTGTTTTCTTTAACAAAAAAAAAGAAGCTGAAATAGCAGA
AACTGAAAACACATTAGAAAACACAAAAATATTATTGAAACATTATAAAGGACTTGTTAAATATTATAAT
GGTGAATCATCTCCATTAAAAACTTTAAGTGAAGTATCAATTCAAACAGAAGATAATTATGCCAATTTAG
AAAAATTTAGAGCATTAAGTAAAATAGATGGAAAACTCAATGATAATTTACATTTAGGAAAGAAAAAATT
ATCTTTCTTATCAAGTGGATTACATCATTTAATTACTGAATTAAAAGAAGTAATAAAAAATAAAAATTAT
ACAGGTAATTCTCCAAGTGAAAATAATAAGAAAGTTAACGAAGCTTTAAAATCTTACGAAAATTTTCTCC
CAGAAGCAAAAGTTACAACAGTTGTAACTCCACCTCAACCAGATGTAACTCCATCTCCATTATCTGTAAG
GGTAAGTGGTAGTTCAGGATCCACAAAAGAAGAAACACAAATACCAACTTCAGGCTCTTTATTAACAGAA
TTACAACAAGTAGTACAATTACAAAATTATGACGAAGAAGATGATTCCTTAGTTGTATTACCCATTTTTG
GAGAATCCGAAGATAATGACGAATATTTAGATCAAGTAGTAACTGGAGAAGCAATATCTGTCACAATGGA
TAATATCCTCTCAGGATTTGAAAATGAATATGATGTTATATATTTAAAACCTTTAGCTGGAGTATATAGA
AGCTTAAAAAAACAAATTGAAAAAAACATTATTACATTTAATTTAAATTTGAACGATATCTTAAATTCAC
GTCTTAAGAAACGAAAATATTTCTTAGATGTATTAGAATCTGATTTAATGCAATTTAAACATATATCCTC
AAATGAATACATTATTGAAGATTCATTTAAATTATTGAATTCAGAACAAAAAAACACACTTTTAAAAAGT
TACAAATATATAAAAGAATCAGTAGAAAATGATATTAAATTTGCACAGGAAGGTATAAGTTATTATGAAA
AGGTTTTAGCGAAATATAAGGATGATTTAGAATCAATTAAAAAAGTTATCAAAGAAGAAAAGGAGAAGTT
CCCATCATCACCACCAACAACACCTCCGTCACCAGCAAAAACAGACGAACAAAAGAAGGAAAGTAAGTTC
CTTCCATTTTTAACAAACATTGAGACCTTATACAATAACTTAGTTAATAAAATTGACGATTACTTAATTA
ACTTAAAGGCAAAGATTAACGATTGTAATGTTGAAAAAGATGAAGCACATGTTAAAATAACTAAACTTAG
TGATTTAAAAGCAATTGATGACAAAATAGATCTTTTTAAAAACACTAACGACTTCGAAGCAATTAAAAAA
TTGATAAATGATGATACGAAAAAAGATATGCTTGGCAAATTACTTAGTACAGGATTAGTTCAAAATTTTC
CTAATACAATAATATCAAAATTAATTGAAGGAAAATTCCAAGATATGTTAAACATTTCACAACACCAATG
CGTAAAAAAACAATGTCCAGAAAATTCTGGATGTTTCAGACATTTAGATGAAAGAGAAGAATGTAAATGT
TTATTAAATTACAAACAAGAAGGTGATAAATGTGTTGAAAATCCAAATCCTACTTGTAACGAAAATAATG
GTGGATGTGATGCAGATGCCACATGTACCGAAGAAGATTCAGGTAGCAGCAGAAAGAAAATCACATGTGA
ATGTACTAAACCTGATTCTTATCCACTTTTCGATGGTATTTTCTGCAGTTCCTCTAACTTCTTAGGAATA
TCATTCTTATTAATACTCATGTTAATATTATACAGTTTCATTTAA

>AB116599.1 Plasmodium falciparum msp1 gene for merozoite surface protein 1, complete cds, isolate:97B224-63
ATGAAGATCATATTCTTTTTATGTTCATTTCTTTTTTTTATTATAAATACACAATGTGTAACACATGAAA
GTTATCAAGAACTTGTCAAAAAACTAGAAGCTTTAGAAGATGCAGTATTGACAGGTTATAGTTTATTTCA
AAAGGAAAAAATGGTATTAAAGGATGGAGCAAATACTCAAGTTGTTGCAAAGCCTGCAGGTGCTGTAAGT
ACTCAAAGTGCTAAAAATCCTCCAGGTGCTACAGTACCTTCAGGTACTGCAAGTACTAAAGGTGCTATAA
GATCTCCAGGTGCTGCAAATCCTTCAGATGATTCAAGTGATTCAGATGCTAAATCTTACGCTGATTTAAA
ACATAGAGTTCAAAATTACTTGTTCACTATTAAAGAACTCAAATATCCCGAACTCTTTGATTTAACCAAT
CATATGTTGACTTTATCTAAAAATGTTGATGGTTTCAAATATTTAATTGATGGATATGAAGAAATTAATG
AATTATTATATAAATTAAACTTTTATTATGATTTATTAAGAGCCAAATTAAATGATGCATGTGCCAATAG
TTATTGTCAAATACCTTTCAATCTTAAAATTCGTGCAAATGAATTAGACGTACTTAAAAAAATTGTGTTC
GGATATAGAAAACCATTAGACAATATTAAAGATAATGTAGGAAAAATGGAAGATTACATTAAAAAAAATA
AAACAACCATAGCAAATATAAATGAATTAATTGAAGGAAGTAAGAAAACAATTGATCAAAATAAGAATGC
AGATAATGAAGAAGGAAAAAAAAAATTATACCAAGCTCAATATAATCTTTTTATTTACAATAAACAATTA
CAAGAAGCACATAATTTAATAAGCGTTTTAGAAAAACGTATTGACACTTTAAAAAAAAATGAAAACATAA
AGAAATTACTTGAAGATATAGATAAAATTAAAACAGATGCCGAAAAACCCACTACTGGAAGTAAACCAAA
TCCTCTCCCTGAGAATAAGAAAAAAGAAGTCGAGGGACACGAAGAAAAAATAAAAGAAATTGCCAAAACT
ATTAAATTTAACATTGATAGTTTATTTACTGATCCACTTGAATTAGAATATTATTTAAGAGAAAAAAATA
AAAAAGTTGATGTAACACCTAAATCACAAGATCCTACGAAATCTGTTCAAATACCAAAAGTTCCTTATCC
AAATGGTATTGTATATCCTTTACCACTCACTGATATTCATAATTCATTAGCTGCAGATAATGATAAAAAT
TCATATGGTGATTTAATGAATCCTGATACTAAAGAAAAAATTAATGAAAAAATTATTACAGATAATAAGG
AAAGAAAAATATTCATTAATAACATTAAAAAACAAATTGATTTAGAAGAAAAAAACATTAATCACACAAA
AGAACAAAATAAAAAATTACTTGAAGATTATGAAAAGTCAAAAAAGGATTATGAAGAATTACTTGAAAAA
TTTTATGAAATGAAATTTAATAATAATTTTGACAAAGATGTCGTAGATAAAATATTCAGTGCAAGATATA
CATATAATGTTGAAAAACAAAAATATAATAATAAATTTTCATCCTCTAATAATTCTGTATATAATGTTCA
AAAATTAAAAAAGGCTCTTTCATATCTTGAAGATTATTCTTTAAGAAAAGGAATTTCTGAAAAAGATTTT
AATCATTATTATACTTTGAAAACTGGCCTCGAAGCTGATATAAAAAAATTAACAGAAGAAATAAAGAGTA
GTGAAAACAAAATTCTAGAAAAAAATTTTAAAGGACTAACACATTCAGCAAATGCTTCCTTAGAAGTATC
TGATATTGTAAAATTACAAGTACAAAAAGTTTTATTAATTAAAAAAATAGAAGACTTAAGAAAGATAGAA
TTATTTTTAAAAAATGCACAACTAAAAGATAGTATTCATGTACCAAATATTTATAAACCACAAAATAAAC
CAGAACCATATTATTTAATTGTATTAAAAAAAGAAGTAGATAAATTAAAAGAATTTATACCAAAAGTAAA
AGACATGTTAAAGAAAGAACAAGCTGTCTTATCAAGTATTACACAACCTTTAGTTGCAGCAAGCGAAACA
ACTGAAGATGGGGGTCACTCCACACACACATTATCCCAATCAGGAGAAACAGAAGTAACAGAAGAAACAG
TAGGACACACAACAACGGTAACAATAACATTACCACCAACACAACCATCACCACCAAAAGAAGTAAAAGT
TGTTGAAAATTCAATAGAACATAAGAGTAATGACAATTCACAAGCCTTGACAAAAACAGTTTATCTAAAG
AAATTAGATGAATTTTTAACTAAATCATATATATGTCATAAATATATTTTAGTATCAAACTCTAGTATGG
ACCAAAAATTATTAGAGGTATATAATCTTACTCCAGAAGAAGAAAATGAATTAAAATCATGTGATCCATT
AGATTTATTATTTAATATTCAAAATAACATACCTGCTATGTATTCATTATATGATAGTATGAACAATGAT
TTACAACATCTCTTTTTTGAATTATATCAAAAGGAAATGATTTATTATTTACATAAACTAAAAGAGGAAA
ATCACATCAAAAAATTATTAGAGGAGCAAAAACAAATAACTGGAACATCATCTACATCCAGTCCTGGAAA
TACAACCGTAAATACTGCTCAATCCGCAACTCACAGTAATTCCCAAAACCAACAATCAAATGCATCCTCT
ACCAATACCCAAAATGGTGTAGCTGTATCATCTGGTCCTGCTGTAGTTGAAGAAAGTCATGATCCCTTAA
CAGTATTGTCTATTAGTAACGATTTGAAAGGTATTGTTAGTCTCTTAAATCTTGGAAATAAAACTAAAGT
ACCTAATCCATTAACCATTTCTACAACAGAGATGGAAAAATTTTATGAGAATATTTTAAAAAATAATGAT
ACCTATTTTAATGATGATATCAAACAATTCGTAAAATCTAATTCAAAAGTAATTACAGGTTTGACCGAAA
CACAAAAAAATGCATTAAATGATGAAATTAAAAAATTAAAAGATACTTTACAGTTATCATTTGATTTATA
TAATAAATATAAATTAAAATTAGATAGATTATTTAATAAGAAAAAAGAACTTGGCCAAGACAAAATGCAA
ATTAAAAAACTTACTTTATTAAAAGAACAATTAGAATCAAAATTGAATTCACTTAATAACCCACATAATG
TATTACAAAACTTTTCTGTTTTCTTTAACAAAAAAAAAGAAGCTGAAATAGCAGAAACTGAAAACACATT
AGAAAACACAAAAATATTATTGAAACATTATAAAGGACTTGTTAAATATTATAATGGTGAATCATCTCCA
TTAAAAACTTTAAGTGAAGTATCAATTCAAACAGAAGATAATTATGCCAATTTAGAAAAATTTAGAGTAT
TAAGTAAAATAGATGGAAAACTCAATGATAATTTACATTTAGGAAAGAAAAAATTATCTTTCTTATCAAG
TGGATTACATCATTTAATTACTGAATTAAAAGAAGTAATAAAAAATAAAAATTATACAGGTAATTCTCCA
AGTGAAAATAATAAGAAAGTTAACGAAGCTTTAAAATCTTACGAAAATTTTCTCCCAGAAGCAAAAGTTA
CAACAGTTGTAACTCCACCTCAACCAGATGTAACTCCATCTCCATTATCTGTAAGGGTAAGTGGTAGTTC
AGGATCCACAAAAGAAGAAACACAAATACCAACTTCAGGCTCTTTATTAACAGAATTACAACAAGTAGTA
CAATTACAAAATTATGACGAAGAAGATGATTCCTTAGTTGTATTACCCATTTTTGGAGAATCCGAAGATA
ATGACGAATATTTAGATCAAGTAGTAACTGGAGAAGCAATATCTGTCACAATGGATAATATCCTCTCAGG
ATTTGAAAATGAATATGATGTTATATATTTAAAACCTTTAGCTGGAGTATATAGAAGCTTAAAAAAACAA
ATTGAAAAAAACATTATTACATTTAATTTAAATTTGAACGATATCTTAAATTCACGTCTTAAGAAACGAA
AATATTTCTTAGATGTATTAGAATCTGATTTAATGCAATTTAAACATATATCCTCAAATGAATACATTAT
TGAAGATTCATTTAAATTATTGAATTCAGAACAAAAAAACACACTTTTAAAAAGTTACAAATATATAAAA
GAATCAGTAGAAAATGATATTAAATTTGCACAGGAAGGTATAAGTTATTATGAAAAGGTTTTAGCGAAAT
ATAAGGATGATTTAGAATCAATTAAAAAAGTTATCAAAGAAGAAAAGGAGTTCCCATCATCACCACCAAC
AACACCTCCGTCACCAGCAAAAACAGACGAACAAAAGAAGGAAAGTAAGTTCCTTCCATTTTTAACAAAC
ATTGAGACCTTATACAATAACTTAGTTAATAAAATTGACGATTACTTAATTAACTTAAAGGCAAAGATTA
ACGATTGTAATGTTGAAAAAGATGAAGCACATGTTAAAATAACTAAACTTAGTGATTTAAAAGCAATTGA
TGACAAAATAGATCTTTTTAAAAACACTAACGACTTCGAAGCAATTAAAAAATTGATAAATGATGATACG
AAAAAAGATATGCTTGGCAAATTACTTAGTACAGGATTAGTTCAAAATTTTCCTAATACAATAATATCAA
AATTAATTGAAGGAAAATTCCAAGATATGTTAAACATTTCACAACACCAATGCGTAAAAAAACAATGTCC
AGAAAATTCTGGATGTTTCAGACATTTAGATGAAAGAGAAGAATGTAAATGTTTATTAAATTACAAACAA
GAAGGTGATAAATGTGTTGAAAATCCAAATCCTACTTGTAACGAAAATAATGGTGGATGTGATGCAGATG
CCAAATGTACCGAAGAAGATTCAGGTAGCAACGGAAAGAAAATCACATGTGAATGTACTAAACCTGATTC
TTATCCACTTTTCGATGGTATTTTCTGCAGTTCCTCTAACTTCTTAGGAATATCATTCTTATTAATACTC
ATGTTAATATTATACAGTTTCATTTAA

>AB116600.1 Plasmodium falciparum msp1 gene for merozoite surface protein 1, complete cds, isolate:96M320-50
ATGAAGATCATATTCTTTTTATGTTCATTTCTTTTTTTTATTATAAATACACAATGTGTAACACATGAAA
GTTATCAAGAACTTGTCAAAAAACTAGAAGCTTTAGAAGATGCAGTATTGACAGGTTATAGTTTATTTCA
AAAGGAAAAAATGGTATTAAAGGATGGAGCAAATACTCAAGTTGTTGCAAAGCCTGCAGGTGCTGTAAGT
ACTCAAAGTGCTAAAAATCCTCCAGGTGCTACAGTACCTTCAGGTACTGCAAGTACTAAAGGTGCTATAA
GATCTCCAGGTGCTGCAAATCCTTCAGATGATTCAAGTGATTCAGATGCTAAATCTTACGCTGATTTAAA
ACATAGAGTTCAAAATTACTTGTTCACTATTAAAGAACTCAAATATCCCGAACTCTTTGATTTAACCAAT
CATATGTTGACTTTATCTAAAAATGTTGATGGTTTCAAATATTTAATTGATGGATATGAAGAAATTAATG
AATTATTATATAAATTAAACTTTTATTATGATTTATTAAGAGCCAAATTAAATGATGCATGTGCCAATAG
TTATTGTCAAATACCTTTCAATCTTAAAATTCGTGCAAATGAATTAGACGTACTTAAAAAAATTGTGTTC
GGATATAGAAAACCATTAGACAATATTAAAGATAATGTAGGAAAAATGGAAGATTACATTAAAAAAAATA
AAACAACCATAGCAAATATAAATGAATTAATTGAAGGAAGTAAGAAAACAATTGATCAAAATAAGAATGC
AGATAATGAAGAAGGAAAAAAAAAATTATACCAAGCTCAATATAATCTTTTTATTTACAATAAACAATTA
CAAGAAGCACATAATTTAATAAGCGTTTTAGAAAAACGTATTGACACTTTAAAAAAAAATGAAAACATAA
AGAAATTACTTGAAGATATAGATAAAATTAAAACAGATGCCGAAAAACCCACTACTGGAAGTAAACCAAA
TCCTCTCCCTGAGAATAAGAAAAAAGAAGTCGAGGGACACGAAGAAAAAATAAAAGAAATTGCCAAAACT
ATTAAATTTAACATTGATAGTTTATTTACTGATCCACTTGAATTAGAATATTATTTAAGAGAAAAAAATA
AAAAAGTTGATGTAACACCTAAATCACAAGATCCTACGAAATCTGTTCAAATACCAAAAGTTCCTTATCC
AAATGGTATTGTATATCCTTTACCACTCACTGATATTCATAATTCATTAGCTGCAGATAATGATAAAAAT
TCATATGGTGATTTAATGAATCCTGATACTAAAGAAAAAATTAATGAAAAAATTATTACAGATAATAAGG
AAAGAAAAATATTCATTAATAACATTAAAAAACAAATTGATTTAGAAGAAAAAAACATTAATCACACAAA
AGAACAAAATAAAAAATTACTTGAAGATTATGAAAAGTCAAAAAAGGATTATGAAGAATTACTTGAAAAA
TTTTATGAAATGAAATTTAATAATAATTTTGACAAAGATGTCGTAGATAAAATATTCAGTGCAAGATATA
CATATAATGTTGAAAAACAAAAATATAATAATAAATTTTCATCCTCTAATAATTCTGTATATAATGTTCA
AAAATTAAAAAAGGCTCTTTCATATCTTGAAGATTATTCTTTAAGAAAAGGAATTTCTGAAAAAGATTTT
AATCATTATTATACTTTGAAAACTGGCCTCGAAGCTGATATAAAAAAATTAACAGAAGAAATAAAGAGTA
GTGAAAACAAAATTCTAGAAAAAAATTTTAAAGGACTAACACATTCAGCAAATGCTTCCTTAGAAGTATC
TGATATTGTAAAATTACAAGTACAAAAAGTTTTATTAATTAAAAAAATAGAAGACTTAAGAAAGATAGAA
TTATTTTTAAAAAATGCACAACTAAAAGATAGTATTCATGTACCAAATATTTATAAACCACAAAATAAAC
CAGAACCATATTATTTAATTGTATTAAAAAAAGAAGTAGATAAATTAAAAGAATTTATACCAAAAGTAAA
AGACATGTTAAAGAAAGAACAAGCTGTCTTATCAAGTATTACACAACCTTTAGTTGCAGCAAGCGAAACA
ACTGAAGATGGGGGTCACTCCACACACACATTATCCCAATCAGGAGAAACAGAAGTAACAGAAGAAACAG
TAGGACACACAACAACGGTAACAATAACATTACCACCAACACAACCATCACCACCAAAAGAAGTAAAAGT
TGTTGAAAATTCAATAGAACATAAGAGTAATGACAATTCACAAGCCTTGACAAAAACAGTTTATCTAAAG
AAATTAGATGAATTTTTAACTAAATCATATATATGTCATAAATATATTTTAGTATCAAACTCTAGTATGG
ACCAAAAATTATTAGAGGTATATAATCTTACTCCAGAAGAAGAAAATGAATTAAAATCATGTGATCCATT
AGATTTATTATTTAATATTCAAAATAACATACCTGCTATGTATTCATTATATGATAGTATGAACAATGAT
TTACAACATCTCTTTTTTGAATTATATCAAAAGGAAATGATTTATTATTTACATAAACTAAAAGAGGAAA
ATCACATCAAAAAATTATTAGAGGAGCAAAAACAAATAACTGGAACATCATCTACATCCAGTCCTGGAAA
TACAACCGTAAATACTGCTCAATCCGCAACTCACAGTAATTCCCAAAACCAACAATCAAATGCATCCTCT
ACCAATACCCAAAATGGTGTAGCTGTATCATCTGGTCCTGCTGTAGTTGAAGAAAGTCATGATCCCTTAA
CAGTATTGTCTATTAGTAACGATTTGAAAGGTATTGTTAGTCTCTTAAATCTTGGAAATAAAACTAAAGT
ACCTAATCCATTAACCATTTCTACAACAGAGATGGAAAAATTTTATGAGAATATTTTAAAAAATAATGAT
ACCTATTTTAATGATGATATCAAACAATTCGTAAAATCTAATTCAAAAGTAATTACAGGTTTGACCGAAA
CACAAAAAAATGCATTAAATGATGAAATTAAAAAATTAAAAGATACTTTACAGTTATCATTTGATTTATA
TAATAAATATAAATTAAAATTAGATAGATTATTTAATAAGAAAAAAGAACTTGGCCAAGACAAAATGCAA
ATTAAAAAACTTACTTTATTAAAAGAACAATTAGAATCAAAATTGAATTCACTTAATAACCCACATAATG
TATTACAAAACTTTTCTGTTTTCTTTAACAAAAAAAAAGAAGCTGAAATAGCAGAAACTGAAAACACATT
AGAAAACACAAAAATATTATTGAAACATTATAAAGGACTTGTTAAATATTATAATGGTGAATCATCTCCA
TTAAAAACTTTAAGTGAAGTATCAATTCAAACAGAAGATAATTATGCCAATTTAGAAAAATTTAGAGCAT
TAAGTAAAATAGATGGAAAACTCAATGATAATTTACATTTAGGAAAGAAAAAATTATCTTTCTTATCAAG
TGGATTACATCATTTAATTACTGAATTAAAAGAAGTAATAAAAAATAAAAATTATACAGGTAATTCTCCA
AGTGAAAATAATAAGAAAGTTAACGAAGCTTTAAAATCTTACGAAAATTTTCTCCCAGAAGCAAAAGTTA
CAACAGTTGTAACTCCACCTCAACCAGATGTAACTCCATCTCCATTATCTGTAAGGGTAAGTGGTAGTTC
AGGATCCACAAAAGAAGAAACACAAATACCAACTTCAGGCTCTTTATTAACAGAATTACAACAAGTAGTA
CAATTACAAAATTATGACGAAGAAGATGATTCCTTAGTTGTATTACCCATTTTTGGAGAATCCGAAGATA
ATGACGAATATTTAGATCAAGTAGTAACTGGAGAAGCAATATCTGTCACAATGGATAATATCCTCTCAGG
ATTTGAAAATGAATATGATGTTATATATTTAAAACCTTTAGCTGGAGTATATAGAAGCTTAAAAAAACAA
ATTGAAAAAAACATTATTACATTTAATTTAAATTTGAACGATATCTTAAATTCACGTCTTAAGAAACGAA
AATATTTCTTAGATGTATTAGAATCTGATTTAATGCAATTTAAACATATATCCTCAAATGAATACATTAT
TGAAGATTCATTTAAATTATTGAATTCAGAACAAAAAAACACACTTTTAAAAAGTTACAAATATATAAAA
GAATCAGTAGAAAATGATATTAAATTTGCACAGGAAGGTATAAGTTATTATGAAAAGGTTTTAGCGAAAT
ATAAGGATGATTTAGAATCAATTAAAAAAGTTATCAAAGAAGAAAAGGAGTTCCCATCATCACCACCAAC
AACACCTCCGTCACCAGCAAAAACAGACGAACAAAAGAAGGAAAGTAAGTTCCTTCCATTTTTAACAAAC
ATTGAGACCTTATACAATAACTTAGTTAATAAAATTGACGATTACTTAATTAACTTAAAGGCAAAGATTA
ACGATTGTAATGTTGAAAAAGATGAAGCACATGTTAAAATAACTAAACTTAGTGATTTAAAAGCAATTGA
TGACAAAATAGATCTTTTTAAAAACACTAACGACTTCGAAGCAATTAAAAAATTGATAAATGATGATACG
AAAAAAGATATGCTTGGCAAATTACTTAGTACAGGATTAGTTCAAAATTTTCCTAATACAATAATATCAA
AATTAATTGAAGGAAAATTCCAAGATATGTTAAACATTTCACAACACCAATGCGTAAAAAAACAATGTCC
AGAAAATTCTGGATGTTTCAGACATTTAGATGAAAGAGAAGAATGTAAATGTTTATTAAATTACAAACAA
GAAGGTGATAAATGTGTTGAAAATCCAAATCCTACTTGTAACGAAAATAATGGTGGATGTGATGCAGATG
CCACATGTACCGAAGAAGATTCAGGTAGCAGCAGAAAGAAAATCACATGTGAATGTACTAAACCTGATTC
TTATCCACTTTTCGATGGTATTTTCTGCAGTTCCTCTAACTTCTTAGGAATATCATTCTTATTAATACTC
ATGTTAATATTATACAGTTTCATTTAA

>AB116601.1 Plasmodium falciparum msp1 gene for merozoite surface protein 1, complete cds, isolate:97B317-40
ATGAAGATCATATTCTTTTTATGTTCATTTCTTTTTTTTATTATAAATACACAATGTGTAACACATGAAA
GTTATCAAGAACTTGTCAAAAAACTAGAAGCTTTAGAAGATGCAGTATTGACAGGTTATAGTTTATTTCA
AAAGGAAAAAATGGTATTAAAGGATGGAGCAAATACTCAAGTTGTTGCAAAGCCTGCAGGTGCTGTAAGT
ACTCAAAGTGCTAAAAATCCTCCAGGTGCTACAGTACCTTCAGGTACTGCAAGTACTAAAGGTGCTATAA
GATCTCCAGGTGCTGCAAATCCTTCAGATGATTCAAGTGATTCAGATGCTAAATCTTACGCTGATTTAAA
ACATAGAGTTCAAAATTACTTGTTCACTATTAAAGAACTCAAATATCCCGAACTCTTTGATTTAACCAAT
CATATGTTGACTTTATCTAAAAATGTTGATGGTTTCAAATATTTAATTGATGGATATGAAGAAATTAATG
AATTATTATATAAATTAAACTTTTATTATGATTTATTAAGAGCCAAATTAAATGATGCATGTGCCAATAG
TTATTGTCAAATACCTTTCAATCTTAAAATTCGTGCAAATGAATTAGACGTACTTAAAAAAATTGTGTTC
GGATATAGAAAACCATTAGACAATATTAAAGATAATGTAGGAAAAATGGAAGATTACATTAAAAAAAATA
AAACAACCATAGCAAATATAAATGAATTAATTGAAGGAAGTAAGAAAACAATTGATCAAAATAAGAATGC
AGATAATGAAGAAGGAAAAAAAAAATTATACCAAGCTCAATATAATCTTTTTATTTACAATAAACAATTA
CAAGAAGCACATAATTTAATAAGCGTTTTAGAAAAACGTATTGACACTTTAAAAAAAAATGAAAACATAA
AGAAATTACTTGAAGATATAGATAAAATTAAAACAGATGCCGAAAAACCCACTACTGGAAGTAAACCAAA
TCCTCTCCCTGAGAATAAGAAAAAAGAAGTCGAGGGACACGAAGAAAAAATAAAAGAAATTGCCAAAACT
ATTAAATTTAACATTGATAGTTTATTTACTGATCCACTTGAATTAGAATATTATTTAAGAGAAAAAAATA
AAAAAGTTGATGTAACACCTAAATCACAAGATCCTACGAAATCTGTTCAAATACCAAAAGTTCCTTATCC
AAATGGTATTGTATATCCTTTACCACTCACTGATATTCATAATTCATTAGCTGCAGATAATGATAAAAAT
TCATATGGTGATTTAATGAATCCTGATACTAAAGAAAAAATTAATGAAAAAATTATTACAGATAATAAGG
AAAGAAAAATATTCATTAATAACATTAAAAAACAAATTGATTTAGAAGAAAAAAACATTAATCACACAAA
AGAACAAAATAAAAAATTACTTGAAGATTATGAAGAGTCAAAAAAGGATTATGAAAAATTACTTGAAAAA
TTTTATGAAATGAAATTTAATAATAATTTTGACAAAGATGTCGTAGATAAAATATTCAGTGCAAGATATA
CATATAATGTTGAAAAACAAAGATATAATAATAAATTTTCATCCTCTAATAATTCTGTATATAATGTTCA
AAAATTAAAAAAGGCTCTTTCATATCTTGAAGATTATTCTTTAAGAAAAGGAATTTCTGAAAAAGATTTT
AATCATTATTATACTTTGAAAACTGGCCTCGAAGCTGATATAAAAAAATTAACAGAAGAAATAAAGAGTA
GTGAAAACAAAATTCTAGAAAAAAATTTTAAAGGACTAACACATTCAGCAAATGCTTCCTTAGAAGTATC
TGATATTGTAAAATTACAAGTACAAAAAGTTTTATTAATTAAAAAAATAGAAGACTTAAGAAAGATAGAA
TTATTTTTAAAAAATGCACAACTAAAAGATAGTATTCATGTACCAAATATTTATAAACCACAAAATAAAC
CAGAACCATATTATTTAATTGTATTAAAAAAAGAAGTAGATAAATTAAAAGAATTTATACCAAAAGTAAA
AGACATGTTAAAGAAAGAACAAGCTGTCTTATCAAGTATTACACAACCTTTAGTTGCAGCAAGCGAAACA
ACTGAAGATGGGGGTCACTCCACACACACATTATCCCAATCAGGAGAAACAGAAGTAACAGAAGAAACAG
TAGGACACACAACAACGGTAACAATAACATTACCACCAACACAACCATCACCACCAAAAGAAGTAAAAGT
TGTTGAAAATTCAATAGAACATAAGAGTAATGACAATTCACAAGCCTTGACAAAAACAGTTTATCTAAAG
AAATTAGATGAATTTTTAACTAAATCATATATATGTCATAAATATATTTTAGTATCAAACTCTAGTATGG
ACCAAAAATTATTAGAGGTATATAATCTTACTCCAGAAGAAAAAAATGAATTAAAATCATGTGATCCATT
AGATTTATTATTTAATATTCAAAATAACATACCTGCTATGTATTCATTATATGATAGTATGAACAATGAT
TTACAACATCTCTTTTTTGAATTATATCAAAAGGAAATGATTTATTATTTACATAAACTAAAAGAGGAAA
ATCACATCAAAAAATTATTAGAGGAGCAAAAACAAATAACTGGAACATCATCTACATCCAGTCCTGGAAA
TACAACCGTAAATACTGCTCAATCCGCAACTCACAGTAATTCCCAAAACCAACAATCAAATGCATCCTCT
ACCAATACCCAAAATGGTGTAGCTGTATCATCTGGTCCTGCTGTAGTTGAAGAAAGTCATGATCCCTTAA
CAGTATTGTCTATTAGTAACGATTTGAAAGGTATTGTTAGTCTCTTAAATCTTGGAAATAAAACTAAAGT
ACCTAATCCATTAACCATTTCTACAACAGAGATGGAAAAATTTTATGAGAATATTTTAAAAAATAATGAT
ACCTATTTTAATGATGATATCAAACAATTCGTAAAATCTAATTCAAAAGTAATTACAGGTTTGACCGAAA
CACAAAAAAATGCATTAAATGATGAAATTAAAAAATTAAAAGATACTTTACAGTTATCATTTGATTTATA
TAATAAATATAAATTAAAATTAGATAGATTATTTAATAAGAAAAAAGAACTTGGCCAAGACAAAATGCAA
ATTAAAAAACTTACTTTATTAAAAGAACAATTAGAATCAAAATTGAATTCACTTAATAACCCACATAATG
TATTACAAAACTTTTCTGTTTTCTTTAACAAAAAAAAAGAAGCTGAAATAGCAGAAACTGAAAACACATT
AGAAAACACAAAAATATTATTGAAACATTATAAAGGACTTGTTAAATATTATAATGGTGAATCATCTCCA
TTAAAAACTTTAAGTGAAGTATCAATTCAAACAGAAGATAATTATGCCAATTTAGAAAAATTTAGAGTAT
TAAGTAAAATAGATGGAAAACTCAATGATAATTTACATTTAGGAAAGAAAAAATTATCTTTCTTATCAAG
TGGATTACATCATTTAATTACTGAATTAAAAGAAGTAATAAAAAATAAAAATTATACAGGTAATTCTCCA
AGTGAAAATAATAAGAAAGTTAACGAAGCTTTAAAATCTTACGAAAATTTTCTCCCAGAAGCAAAAGTTA
CAACAGTTGTAACTCCACCTCAACCAGATGTAACTCCATCTCCATTATCTGTAAGGGTAAGTGGTAGTTC
AGGATCCACAAAAGAAGAAACACAAATACCAACTTCAGGCTCTTTATTAACAGAATTACAACAAGTAGTA
CAATTACAAAATTATGACGAAGAAGATGATTCCTTAGTTGTATTACCCATTTTTGGAGAATCCGAAGATA
ATGACGAATATTTAGATCAAGTAGTAACTGGAGAAGCAATATCTGTCACAATGGATAATATCCTCTCAGG
ATTTGAAAATGAATATGATGTTATATATTTAAAACCTTTAGCTGGAGTATATAGAAGCTTAAAAAAACAA
ATTGAAAAAAACATTTTTACATTTAATTTAAATTTGAACGATATCTTAAATTCACGTCTTAAGAAACGAA
AATATTTCTTAGATGTATTAGAATCTGATTTAATGCAATTTAAACATATATCCTCAAATGAATACATTAT
TGAAGATTCATTTAAATTATTGAATTCAGAACAAAAAAACACACTTTTAAAAAGTTACAAATATATAAAA
GAATCAGTAGAAAATGATATTAAATTTGCACAGGAAGGTATAAGTTATTATGAAAAGGTTTTAGCGAAAT
ATAAGGATGATTTAGAATCAATTAAAAAAGTTATCAAAGAAGAAAAGGAGAAGTTCCCATCATCACCACC
AACAACACCTCCGTCACCAGCAAAAACAGACGAACAAAAGAAGGAAAGTAAGTTCCTTCCATTTTTAACA
AACATTGAGACCTTATACAATAACTTAGTTAATAAAATTGACCATTACTTAATTAACTTAAAGGCAAAGA
TTAACGATTGTAATGTTGAAAAAGATGAAGCACATGTTAAAATAACTAAACTTAGTGATTTAAAAGCAAT
TGATGACAAAATAGATCTTTTTAAAAACCATAACGACTTCGAAGCAATTAAAAAATTGATAAATGATGAT
ACGAAAAAAGATATGCTTGGCAAATTACTTAGTACAGGATTAGTTCAAAATTTTCCTAATACAATAATAT
CAAAATTAATTGAAGGAAAATTCCAAGATATGTTAAACATTTCACAACACCAATGCGTAAAAAAACAATG
TCCACAAAATTCTGGATGTTTCAGACATTTAGATGAAAGAGAAGAATGTAAATGTTTATTAAATTACAAA
CAAGAAGGTGATAAATGTGTTGAAAATCCAAATCCTACTTGTAACGAAAATAATGGTGGATGTGATGCAG
ATGCCAAATGTACCGAAGAAGATTCAGGTAGCAACGGAAAGAAAATCACATGTGAATGTACTAAACCTGA
TTCTTATCCATTTTTCGATGGTATTTTCTGCAGTTCCTCTAACTTCTTAGGAATATCATTCTTATTAATA
CTCATGTTAATATTATACAGTTTCATTTAA

>AB276001.1 Plasmodium falciparum msp1 gene for merozoite surface protein-1, complete cds, isolate: HB3
ATGAAGATCATATTCTTTTTATGTTCATTTCTTTTTTTTATTATAAATACACAATGTGTAACACATGAAA
GTTATCAAGAACTTGTCAAAAAACTAGAAGCTTTAGAAGATGCAGTATTGACAGGTTATAGTTTATTTCA
AAAGGAAAAAATGGTATTAAATGAAGGAACAAGTGGAACAGCTGTTACAACTAGTACACCTGGTTCAAAG
GGTTCAGTTGCTTCAGGTGGTTCAGGTGGCTCAGTTGCTTCAGGTGGCTCAGTTGCTTCAGGTGGTTCAG
GTAATTCAAGACGTACAAATCCTTCAGATAATTCAAGTGATTCAGATGCTAAATCTTACGCTGATTTAAA
ACACAGAGTACGAAATTACTTGTTAACTATCAAAGAACTCAAATATCCTCAACTCTTTGATTTAACTAAT
CATATGTTAACTTTGTGTGATAATATTCATGGTTTCAAATATTTAATTGATGGATATGAAGAAATTAATG
AATTATTATATAAATTAAACTTTTATTTTGATTTATTAAGAGCAAAATTAAATGATGTATGTGCTAATGA
TTATTGTCAAATACCTTTCAATCTTAAAATTCGTGCAAATGAATTAGACGTACTTAAAAAACTTGTGTTC
GGATATAGAAAACCATTAGACAATATTAAAGATAATGTAGGAAAAATGGAAGATTACATTAAAAAAAATA
AAAAAACCATAGAAAATATAAATGAATTAATTGAAGGAAGTAAGAAAACAATTGATAAAAATAAGAATGC
AACTAAAGAAGAAGAAAAAAAAAAATTATACCAAGCTCAATATGATCTTTCTATTTACAATAAACAATTA
GAAGAAGCACATAATTTAATAAGCGTTTTAGAAAAACGTATTGACACTTTAAAAAAAAATGAAAACATAA
AGAAATTACTTGATAAGATAAATGAAATTAAAAATCCCCCACCGGCCAATTCTGGAAATACACCAAATAC
TCTCCTTGATAAGAACAAAAAAATCGAGGAACACGAAAAAGAAATAAAAGAAATTGCCAAAACTATTAAA
TTTAATATTGATAGTTTATTTACTGATCCACTTGAATTAGAATACTATTTAAGAGAAAAAAATAAAAATA
TTGATATAAGTGCAAAGGTTGAAACAAAGGAATCAACTGAACCCAATGAATATCCAAATGGAGTTACTTA
TCCTTTGTCATATAACGATATTAACAATGCTTTAAATGAACTTAATTCTTTTGGTGATTTAATTAATCCA
TTTGATTATACAAAAGAACCAAGTAAAAACATATATACTGATAATGAAAGAAAAAAATTCATAAATGAAA
TTAAGGAAAAAATTAAAATAGAAAAAAAAAAAATTGAATCTGATAAAAAATCTTACGAAGACAGATCTAA
GTCTTTAAATGATATAACAAAAGAATATGAAAAATTACTTAATGAAATTTATGATAGCAAATTCAATAAT
AATATAGATTTAACTAATTTCGAAAAAATGATGGGTAAAAGATATTCATATAAAGTTGAGAAACTTACAC
ACCATAATACTTTTGCATCCTATGAAAATTCTAAACATAATCTTGAAAAGTTAACAAAAGCTCTTAAATA
TATGGAAGATTATTCTTTAAGGAATATAGTAGTTGAAAAAGAATTAAAATATTATAAAAATTTAATAAGC
AAAATAAAAAATGAGATTGAAACATTAGTTGAAAATATTAAAAAAGATGAAGAACAGCTTTTTGAAAAAA
AAATTACTAAAGACGAAAATAAACCAGATGAAAAAATTTTAGAAGTATCTGACATTGTAAAAGTACAAGT
TCAAAAAGTTTTATTAATGAACAAAATTGACGAATTAAAAAAGACTCAATTGATTTTAAAAAATGTAGAA
TTAAAACATAATATACATGTTCCCAATTCTTACAAACAAGAAAATAAGCAAGAACCTTATTATTTAATTG
TGTTGAAAAAAGAAATTGATAAATTAAAAGTGTTCATGCCTAAGGTAGAATCATTGATAAATGAAGAAAA
AAAAAACATAAAAACAGAAGGTCAATCGGATAATTCGGAACCATCAACCGAAGGAGAAATAACAGGACAA
GCAACTACAAAACCTGGACAACAAGCAGGATCTGCTTTAGAAGGAGATTCAGTACAAGCACAAGCACAAG
AACAAAAACAAGCACAACCACCAGTACCAGTACCAGTACCAGAAGCAAAAGCACAAGTCCCAACACCACC
AGCACCAGTAAATAATAAAACTGAAAATGTTTCCAAATTAGATTATCTTGAAAAATTATATGAATTTTTA
AATACTTCATATATATGTCACAAATATATTTTGGTTTCACACTCAACTATGAACGAAAAGATATTAAAAC
AATATAAAATTACAAAGGAGGAAGAAAGCAAATTAAGTTCATGTGATCCATTAGACTTATTGTTTAATAT
ACAAAATAACATACCTGTAATGTATTCTATGTTTGATAGCTTAAACAATAGTTTATCACAACTATTTATG
GAAATTTATGAAAAAGAAATGGTTTGTAATTTATATAAACTTAAGGATAATGACAAAATTAAAAATTTAT
TAGAGGAAGCGAAAAAAGTATCCACATCTGTAAAAACTCTTTCAAGTTCATCAATGCAACCATTATCATT
AACACCTCAGGATAAACCCGAAGTAAGTGCAAATGATGATACATCACATTCTACAAATTTGAATAATAGT
TTAAAATTATTTGAAAACATATTGAGTCTTGGAAAAAACAAAAATATATACCAAGAATTAATAGGTCAAA
AAAGTAGTGAAAACTTTTATGAAAAGATATTAAAAGATAGTGATACATTTTATAATGAATCTTTTACAAA
TTTTGTAAAATCTAAAGCTGATGATATTAATTCATTGAATGATGAATCAAAAAGGAAGAAATTAGAAGAA
GATATTAATAAATTAAAAAAAACTTTACAGTTATCATTTGATTTATATAATAAATATAAATTAAAATTAG
AAAGATTATTTGATAAAAAGAAAACAGTTGGTAAATATAAAATGCAAATTAAAAAACTTACTTTATTAAA
AGAACAATTAGAATCAAAATTGAATTCACTTAATAACCCAAAGCATGTATTACAAAACTTTTCTGTTTTC
TTCTACAAAAAAAAAGAAGCTGAAATAGCAGAAACTGAAAACACATTAGAAAACACAAAAATATTATTGA
AACATTATAAAGGACTTGTTAAATATTATAATGGTGAATCATCTCCATTAAAAACTTTAAGTGAAGAATC
AATTCAAACAGAAGATAATTATGCCAGTTTAGAAAACTTTAAAGTATTAAGTAAATTAGAAGGAAAATTA
AAGGATAATTTAAATTTAGAAAAGAAAAAATTATCATACTTATCAAGTGGATTACATCATTTAATTGCTG
AATTAAAAAAAGTAATAAAAAATAAAAATTATACAGGTAATTCTCCAAGTGAAAATAATACGGATGTTAA
CAATGCATTAGAATCTTACAAAAAATTTCTCCCAGAAGGAACAGATGTTGCAACAGTTGTAAGTGAAAGT
GGATCCGACACATTAGAACAAAGTCAACCAAAGAAACCAGCATCAACTCATGTAGGAGCAGAGTCTAACA
CAATAACAACATCACAAAATGTCGATGATGAAGTAGATGACGTAATCATAGTACCTATATTTGGAGAATC
CGAAGAAGATTATGATGATTTAGGACAAGTAGTAACAGGAGAAGCAGTAACTCCTTCCGTAATTGATAAC
ATACTTTCTAAAATTGAAAATGAATATGAGGTTTTATATTTAAAACCTTTAGCAGGTGTTTATAGAAGTT
TAAAAAAACAATTAGAAAATAACGTTATGACATTTAATGTTAATGTTAAGGATATTTTAAATTCACGATT
TAATAAACGTGAAAATTTCAAAAATGTTTTAGAATCAGATTTAATTCCATATAAAGATTTAACATCAAGT
AATTATGTTGTCAAAGATCCATATAAATTTCTTAATAAAGAAAAAAGAGATAAATTCTTAAGCAGTTATA
ATTATATTAAGGATTCAATAGATACGGATATAAATTTTGCAAATGATGTTCTTGGATATTATAAAATATT
ATCCGAAAAATATAAATCAGATTTAGATTCAATTAAAAAATATATCAACGACAAACAAGGTGAAAATGAG
AAATACCTTCCCTTTTTAAACAATATTGAGACCTTATATAAAACAGTTAATGATAAAATTGATTTATTTG
TAATTCATTTAGAAGCAAAAGTTCTAAATTATACATATGAGAAATCAAACGTAGAAGTTAAAATAAAAGA
ACTTAATTACTTAAAAACAATTCAAGACAAATTGGCAGATTTTAAAAAAAATAACAATTTCGTTGGAATT
GCTGATTTATCAACAGATTATAACCATAATAACTTATTGACAAAGTTCCTTAGTACAGGTATGGTTTTTG
AAAATCTTGCTAAAACCGTTTTATCTAATTTACTTGATGGAAACTTGCAAGGTATGTTAAACATTTCACA
ACACCAATGCGTAAAAAAACAATGTCCACAAAATTCTGGATGTTTCAGACATTTAGATGAAAGAGAAGAA
TGTAAATGTTTATTAAATTACAAACAAGAAGGTGATAAATGTGTTGAAAATCCAAATCCTACTTGTAACG
AAAATAATGGTGGATGTGATGCAGATGCCAAATGTACCGAAGAAGATTCAGGTAGCAACGGAAAGAAAAT
CACATGTGAATGTACTAAACCTGATTCTTATCCACTTTTCGATGGTATTTTCTGCAGTTCCTCTAACTTC
TTAGGAATATCATTCTTATTAATACTCATGTTAATATTATACAGTTTCATTTAA

>AB276002.1 Plasmodium falciparum msp1 gene for merozoite surface protein-1, complete cds, isolate: 7G8
ATGAAGATCATATTCTTTTTATGTTCATTTCTTTTTTTTATTATAAATACACAATGTGTAACACATGAAA
GTTATCAAGAACTTGTCAAAAAACTAGAAGCTTTAGAAGATGCAGTATTGACAGGTTATAGTTTATTTCA
AAAGGAAAAAATGGTATTAAAGGATGGAGCAAATACTCAAGTTGTTGCAAAGCCTGCAGGTGCTGTAAGT
ACTCAAAGTGCTAAAAATCCTCCAGGTGCTACAGTACCTTCAGGTACTGCAAGTACTAAAGGTGCTATAA
GATCTCCAGGTGCTGCAAATCCTTCAGATGATTCAAGTGATTCAGATGCTAAATCTTACGCTGATTTAAA
ACATAGAGTTCAAAATTACTTGTTCACTATTAAAGAACTCAAATATCCCGAACTCTTTGATTTAACCAAT
CATATGTTGACTTTATCTAAAAATGTTGATGGTTTCAAATATTTAATTGATGGATATGAAGAAATTAATG
AATTATTATATAAATTAAACTTTTATTATGATTTATTAAGAGCCAAATTAAATGATGCATGTGCCAATAG
TTATTGTCAAATACCTTTCAATCTTAAAATTCGTGCAAATGAATTAGACGTACTTAAAAAAATTGTGTTC
GGATATAGAAAACCATTAGACAATATTAAAGATAATGTAGGAAAAATGGAAGATTACATTAAAAAAAATA
AAACAACCATAGCAAATATAAATGAATTAATTGAAGGAAGTAAGAAAACAATTGATCAAAATAAGAATGC
AGATAATGAAGAAGGAAAAAAAAAATTATACCAAGCTCAATATGATCTTTTTATTTACAATAAACAATTA
CAAGAAGCACATAATTTAATAAGCGTTTTAGAAAAACGTATTGACACTTTAAAAAAAAATGAAAACATAA
AGAAATTACTTGAAGATATAGATAAAATTAAAACAGATGCCGAAAAACCCACTACTGGAAGTAAACCAAA
TACTCTCCTTGATAAGAACAAAAAAATCGAGGAACACGAAGAAAAAATAAAAGAAATTGCCAAAACTATT
AAATTTAACATTGATAGTTTATTTACTGATCCACTTGAATTAGAATATTATTTAAGAGAAAAAAATAAAA
AAGTTGATGTAACACCTAAATCACAAGATCCTACGAAATCTGTTCAAATACCAAAAGTTCCTTATCCAAA
TGGTATTGTATATCCTTTACCACTCACTGATATTCATAATTCATTAGCTGCAGATAATGATAAAAATTCA
TATGGTGATTTAATGAATCCTGATACTAAAGAAAAAATTAATGAAAAAATTATTACAGATAATAAGGAAA
GAAAAATATTCATTAATAACATTAAAAAACAAATTGATTTAGAAGAAAAAAACATTAATCACACAAAAGA
ACAAAATAAAAAATTACTTGAAGATTATGAAAAGTCAAAAAAGGATTATGAAGAATTACTTGAAAAATTT
TATGAAATGAAATTTAATAATAATTTTGACAAAGATGTCGTAGATAAAATATTCAGTGCAAGATATACAT
ATAATGTTGAAAAACAAAGATATAATAATAAATTTTCATCCTCTAATAATTCTGTATATAATGTTCAAAA
ATTAAAAAAGGCTCTTTCATATCTTGAAGATTATTCTTTAAGAAAAGGAATTTCTGAAAAAGATTTTAAT
CATTATTATACTTTGAAAACTGGCCTCGAAGCTGATATAAAAAAATTAACAGAAGAAATAAAGAGTAGTG
AAAACAAAATTCTAGAAAAAAATTTTAAAGGACTAACACATTCAGCAAATGCTTCCTTAGAAGTATCTGA
TATTGTAAAATTACAAGTACAAAAAGTTTTATTAATTAAAAAAATAGAAGACTTAAGAAAGATAGAATTA
TTTTTAAAAAATGCACAACTAAAAGATAGTATTCATGTACCAAATATTTATAAACCACAAAATAAACCAG
AACCATATTATTTAATTGTATTAAAAAAAGAAGTAGATAAATTAAAAGAATTTATACCAAAAGTAAAAGA
CATGTTAAAGAAAGAACAAGCTGTCTTATCAAGTATTACACAACCTTTAGTTGCAGCAAGCGAAACAACT
GAAGATGGGGGTCACTCCACACACACATTATCCCAATCAGGAGAAACAGAAGTAACAGAAGAAACAGTAG
GACACACAACAACGGTAACAATAACATTACCACCAAAAGAAGTAAAAGTTGTTGAAAATTCAATAGAACA
TAAGAGTAATGACAATTCACAAGCCTTGACAAAAACAGTTTATCTAAAGAAATTAGATGAATTTTTAACT
AAATCATATATATGTCATAAATATATTTTAGTATCAAACTCTAGTATGGACCAAAAATTATTAGAGGTAT
ATAATCTTACTCCAGAAGAAGAAAATGAATTAAAATCATGTGATCCATTAGATTTATTATTTAATATTCA
AAATAACATACCTGCTATGTATTCATTATATGATAGTATGAACAATGATTTACAACATCTCTTTTTTGAA
TTATATCAAAAGGAAATGATTTATTATTTACATAAACTAAAAGAGGAAAATCACATCAAAAAATTATTAG
AGGAGCAAAAACAAATAACTGGAACATCATCTACATCCAGTCCTGGAAATACAACCGTAAATACTGCTCA
ATCCGCAACTCACAGTAATTCCCAAAACCAACAATCAAATGCATCCTCTACCAATACCCAAAATGGTGTA
GCTGTATCATCTGGTCCTGCTGTAGTTGAAGAAAGTCATGATCCCTTAACAGTATTGTCTATTAGTAACG
ATTTGAAAGGTATTGTTAGTCTCTTAAATCTTGGAAATAAAACTAAAGTACCTAATCCATTAACCATTTC
TACAACAGAGATGGAAAAATTTTATGAGAATATTTTAAAAAATAATGATACCTATTTTAATGATGATATC
AAACAATTCGTAAAATCTAATTCAAAAGTAATTACAGGTTTGACCGAAACACAAAAAAATGCATTAAATG
ATGAAATTAAAAAATTAAAAGATACTTTACAGTTATCATTTGATTTATATAATAAATATAAATTAAAATT
AGATAGATTATTTAATAAGAAAAAAGAACTTGGCCAAGACAAAATGCAAATTAAAAAACTTACTTTATTA
AAAGAACAATTAGAATCAAAATTGAATTCACTTAATAACCCATATAATGTATTACAAAACTTTTCTGTTT
TCTTTAACAAAAAAAAAGAAGCTGAAATAGCAGAAACTGAAAACACATTAGAAAACACAAAAATATTATT
GAAACATTATAAAGGACTTGTTAAATATTATAATGGTGAATCATCTCCATTAAAAACTTTAAGTGAAGTA
TCAATTCAAACAGAAGATAATTATGCCAATTTAGAAAAATTTAGAGCATTAAGTAAAATAGATGGAAAAC
TCAATGATAATTTACATTTAGGAAAGAAAAAATTATCTTTCTTATCAAGTGGATTACATCATTTAATTAC
TGAATTAAAAGAAGTAATAAAAAATAAAAATTATACAGGTAATTCTCCAAGTGAAAATAATAAGAAAGTT
AACGAAGCTTTAAAATCTTACGAAAATTTTCTCCCAGAAGCAAAAGTTACAACAGTTGTAACTCCACCTC
AACCAGATGTAACTCCATCTCCATTATCTGTAAGTGTAAGTGGTAGTTCAGGATCCACAAAAGAAGAAAC
ACAAATACCAACTTCAGGCTCTTTATTAACAGAATTACAACAAGTAGTACAATTACAAAATTATGACGAA
GAAGATGATTCCTTAGTTGTATTACCCATTTTTGGAGAATCCGAAGATAATGACGAATATTTAGATCAAG
TAGTAACTGGAGAAGCAATATCTGTCACAATGGATAATATCCTCTCAGGATTTGAAAATGAATATGATGT
TATATATTTAAAACCTTTAGCTGGAGTATATAGAAGCTTAAAAAAACAAATTGAAAAAAACATTATTACA
TTTAATTTAAATTTGAACGATATCTTAAATTCACGTCTTAAGAAACGAAAATATTTCTTAGATGTATTAG
AATCTGATTTAATGCAATTTAAACATATATCCTCAAATGAATACATTATTGAAGATTCATTTAAATTATT
GAATTCAGAACAAAAAAACACACTTTTAAAAAGTTACAAATATATAAAAGAATCAGTAGAAAATGATATT
AAATTTGCACAGGAAGGTATAAGTTATTATGAAAAGGTTTTAGCGAAATATAAGGATGATTTAGAATCAA
TTAAAAAAGTTATCAAAGAAGAAAAGGAGAAGTTCCCATCATCACCACCAACAACACCTCCGTCACCAGC
AAAAACAGACGAACAAAAGAAGGAAAGTAAGTTCCTTCCATTTTTAACAAACATTGAGACCTTATACAAT
AACTTAGTTAATAAAATTGACGATTACTTAATTAACTTAAAGGCAAAGATTAACGATTGTAATGTTGAAA
AAAATGAAGCACATGTTAAAATAACTAAACTTAGTGATTTAAAAGCAATTGATGACAAAATAGATCTTTT
TAAAAACACTAACGACTTCGAAGCAATTAAAAAATTGATAAATGATGATACGAAAAAAGATATGCTTGGC
AAATTACTTAGTACAGGATTAGTTCAAAATTTTCCTAATACAATAATATCAAAATTAATTGAAGGAAAAT
TCCAAGATATGTTAAACATTTCACAACACCAATGCGTAAAAAAACAATGTCCAGAAAATTCTGGATGTTT
CAGACATTTAGATGAAAGAGAAGAATGTAAATGTTTATTAAATTACAAACAAGAAGGTGATAAATGTGTT
GAAAATCCAAATCCTACTTGTAACGAAAATAATGGTGGATGTGATGCAGATGCCACATGTACCGAAGAAG
ATTCAGGTAGCAGCAGAAAGAAAATCACATGTGAATGTACTAAACCTGATTCTTATCCACTTTTCGATGG
TATTTTCTGCAGTTCCTCTAACTTCTTAGGAATATCATTCTTATTAATACTCATGTTAATATTATACAGT
TTCATTTAA

>AB276003.1 Plasmodium falciparum msp1 gene for merozoite surface protein-1, complete cds, isolate: Dd2
ATGAAGATCATATTCTTTTTATGTTCATTTCTTTTTTTTATTATAAATACACAATGTGTAACACATGAAA
GTTATCAAGAACTTGTCAAAAAACTAGAAGCTTTAGAAGATGCAGTATTGACAGGTTATAGTTTATTTCA
AAAGGAAAAAATGGTATTAAATGAAGGAACAAGTGGAACAGCTGTTACAACTAGTACACCTGGTTCAAAG
GGTTCAGTTACTTCAGGTGGTTCAGGTGGTTCAGTTGCTTCAGGTGGTTCAGGTGGCTCAGTTGCTTCAG
GTGGTTCAGGTGGCTCAGTTGCTTCAGGTGGCTCAGTTGCTTCAGGTGGTTCAGGTAATTCAAGACGTAC
AAATCCTTCAGATAATTCAAGTGATTCAGATGCTAAATCTTACGCTGATTTAAAACATAGAGTTCAAAAT
TACTTGTTCACTATTAAAGAACTCAAATATCCCGAACTCTTTGATTTAACCAATCATATGTTAACTTTGT
GTGATAATATTCATGGTTTCAAATATTTAATTGATGGATATGAAGAAATTAATGAATTATTATATAAATT
AAACTTTTATTATGATTTATTAAGAGCCAAATTAAATGATGCATGTGCCAATAGTTATTGTCAAATACCT
TTCAATCTTAAAATTCGTGCAAATGAATTAGACGTACTTAAAAAAATTGTGTTCGGATATAGAAAACCAT
TAGACAATATTAAAGATAATGTAGGAAAAATGGAAGATTACATTAAAAAAAATAAAACAACCATAGCAAA
TATAAATGAATTAATTGAAGGAAGTAAGAAAACAATTGATCAAAATAAGAATGCAGATAATGAAGAAGGA
AAAAAAAAATTATACCAAGCTCAATATAATCTTTTTATTTACAATAAACAATTACAAGAAGCACATAATT
TAATAAGCGTTTTAGAAAAACGTATTGACACTTTAAAAAAAAATGAAAACATAAAGAAATTACTTGATAA
GATAAATGAAATTAAAAATCCCCCACCGGCCAATTCTGGAAATACACCAAATACTCTCCTTGATAAGAAC
AAAAAAATCGAGGAACACGAAGAAAAAATAAAAGAAATTGCCAAAACTATTAAATTTAACATTGATAGTT
TATTTACTGATCCACTTGAATTAGAATATTATTTAAGAGAAAAAAATAAAAAAGTTGATGTAACACCTAA
ATCACAAGATCCTACGAAATCTGTTCAAATACCAAAAGTTCCTTATCCAAATGGTATTGTATATCCTTTA
CCACTCACTGATATTCATAATTCATTAGCTGCAGATAATGATAAAAATTCATATGGTGATTTAATGAATC
CTGATACTAAAGAAAAAATTAATGAAAAAATTATTACAGATAATAAGGAAAGAAAAATATTCATTAATAA
CATTAAAAAACAAATTGATTTAGAAGAAAAAAACATTAATCACACAAAAGAACAAAATAAAAAATTACTT
GAAGATTATGAAAAGTCAAAAAAGGATTATGAAGAATTACTTGAAAAATTTTATGAAATGAAATTTAATA
ATAATTTTAACAAAGATGTCGTAGATAAAATGTTCAGTGCAAGATATACATATAATGTTGAAAAACAAAG
ATATAATAATAAATTTTCATCCTCTAATAATTCTGTATATAATGTTCAAAAATTAAAAAAGGCTCTTTCA
TATCTTGAAGATTATTCTTTAAGAAAAGGAATTTCTGAAAAAGATTTTAATCATTATTATACTTTGAAAA
CTGGCCTCGAAGCTGATATAAAAAAATTAACAGAAGAAATAAAGAGTAGTGAAAACAAAATTCTAGAAAA
AAATTTTAAAGGACTAACACATTCAGCAAATGCTTCCTTAGAAGTATCTGATATTGTAAAATTACAAGTA
CAAAAAGTTTTATTAATTAAAAAAATAGAAGACTTAAGAAAGATAGAATTATTTTTAAAAAATGCACAAC
TAAAAGATAGTATTCATGTACCAAATATTTATAAACCACAAAATAAACCAGAACCATATTATTTAATTGT
ATTAAAAAAAGAAGTAGATAAATTAAAAGAATTTATACCAAAAGTAAAAGACATGTTAAAGAAAGAACAA
GCTGTCTTATCAAGTATTACACAACCTTTAGTTGCAGCAAGCGAAACAACTGAAGATGGGGGTCACTCCA
CACACACATTATCCCAATCAGGAGAAACAGAAGTAACAGAAGAAACAGTAGGACACACAACAACGGTAAC
AATAACATTACCACCAACACAACCATCACCACCAAAAGAAGTAAAAGTTGTTGAAAATTCAATAGAACAT
AAGAGTAATGACAATTCACAAGCCTTGACAAAAACAGTTTATCTAAAGAAATTAGATGAATTTTTAACTA
AATCATATATATGTCATAAATATATTTTAGTATCAAACTCTAGTATGGACCAAAAATTATTAGAGGTATA
TAATCTTACTCCAGAAGAAAAAAATGAATTAAAATCATGTGATCCATTAGATTTATTATTTAATATTCAA
AATAACATACCTGCTATGTATTCATTATATGATAGTATGAACAATGATTTACAACATCTCTTTTTTGAAT
TATATCAAAAGGAAATGATTTATTATTTACATAAACTAAAAGAGGAAAATCACATCAAAAAATTATTAGA
GGAGCAAAAACAAATAACTGGAACATCATCTACATCCAGTCCTGGAAATACAACCGTAAATACTGCTCAA
TCCGCAACTCACAGTAATTCCCAAAACCAACAATCAAATGCATCCTCTACCAATACCCAAAATGGTGTAG
CTGTATCATCTGGTCCTGCTGTAGTTGAAGAAAGTCATGATCCCTTAACAGTATTGTCTATTAGTAACGA
TTTGAAAGGTATTGTTAGTCTCTTAAATCTTGGAAATAAAACTAAAGTACCTAATCCATTAACCATTTCT
ACAACAGAGATGGAAAAATTTTATGAGAATATTTTAAAAAATAATGATACCTATTTTAATGATGATATCA
AACAATTCGTAAAATCTAATTCAAAAGTAATTACAGGTTTGACCGAAACACAAAAAAATGCATTAAATGA
TGAAATTAAAAAATTAAAAGATACTTTACAGTTATCATTTGATTTATATAATAAATATAAATTAAAATTA
GATAGATTATTTAATAAGAAAAAAGAACTTGGCCAAGACAAAATGCAAATTAAAAAACTTACTTTATTAA
AAGAACAATTAGAATCAAAATTGAATTCACTTAATAACCCACATAATGTATTACAAAACTTTTCTGTTTT
CTTTAACAAAAAAAAAGAAGCTGAAATAGCAGAAACTGAAAACACATTAGAAAACACAAAAATATTATTG
AAACATTATAAAGGACTTGTTAAATATTATAATGGTGAATCATCTCCATTAAAAACTTTAAGTGAAGTAT
CAATTCAAACAGAAGATAATTATGCCAATTTAGAAAAATTTAGAGTATTAAGTAAAATAGATGGAAAACT
CAATGATAATTTACATTTAGGAAAGAAAAAATTATCTTTCTTATCAAGTGGATTACATCATTTAATTACT
GAATTAAAAGAAGTAATAAAAAATAAAAATTATACAGGTAATTCTCCAAGTGAAAATAATAAGAAAGTTA
ACGAAGCTTTAAAATCTTACGAAAATTTTCTCCCAGAAGCAAAAGTTACAACAGTTGTAACTCCACCTCA
ACCAGATGTAACTCCATCTCCATTATCTGTAAGGGTAAGTGGTAGTTCAGGATCCACAAAAGAAGAAACA
CAAATACCAACTTCAGGCTCTTTATTAACAGAATTACAACAAGTAGTACAATTACAAAATTATGACGAAG
AAGATGATTCCTTAGTTGTATTACCCATTTTTGGAGAATCCGAAGATAATGACGAATATTTAGATCAAGT
AGTAACTGGAGAAGCAATATCTGTCACAATGGATAATATCCTCTCAGGATTTGAAAATGAATATGATGTT
ATATATTTAAAACCTTTAGCTGGAGTATATAGAAGCTTAAAAAAACAAATTGAAAAAAACATTATTACAT
TTAATTTAAATTTGAACGATATCTTAAATTCACGTCTTAAGAAACGAAAATATTTCTTAGATGTATTAGA
ATCTGATTTAATGCAATTTAAACATATATCCTCAAATGAATACATTATTGAAGATTCATTTAAATTATTG
AATTCAGAACAAAAAAACACACTTTTAAAAAGTTACAAATATATAAAAGAATCAGTAGAAAATGATATTA
AATTTGCACAGGAAGGTATAAGTTATTATGAAAAGGTTTTAGCGAAATATAAGGATGATTTAGAATCAAT
TAAAAAAGTTATCAAAGAAGAAAAGGAGTTCCCATCATCACCACCAACAACACCTCCGTCACCAGCAAAA
ACAGACGAACAAAAGAAGGAAAGTAAGTTCCTTCCATTTTTAACAAACATTGAGACCTTATACAATAACT
TAGTTAATAAAATTGACGATTACTTAATTAACTTAAAGGCAAAGATTAACGATTGTAATGTTGAAAAAGA
TGAAGCACATGTTAAAATAACTAAACTTAGTGATTTAAAAGCAATTGATGACAAAATAGATCTTTTTAAA
AACACTAACGACTTCGAAGCAATTAAAAAATTGATAAATGATGATACGAAAAAAGATATGCTTGGCAAAT
TACTTAGTACAGGATTAGTTCAAAATTTTCCTAATACAATAATATCAAAATTAATTGAAGGAAAATTCCA
AGATATGTTAAACATTTCACAACACCAATGCGTAAAAAAACAATGTCCAGAAAATTCTGGATGTTTCAGA
CATTTAGATGAAAGAGAAGAATGTAAATGTTTATTAAATTACAAACAAGAAGGTGATAAATGTGTTGAAA
ATCCAAATCCTACTTGTAACGAAAATAATGGTGGATGTGATGCAGATGCCAAATGTACCGAAGAAGATTC
AGGTAGCAACGGAAAGAAAATCACATGTGAATGTACTAAACCTGATTCTTATCCACTTTTCGATGGTATT
TTCTGCAGTTCCTCTAACTTCTTAGGAATATCATTCTTATTAATACTCATGTTAATATTATACAGTTTCA
TTTAA

>AB276004.1 Plasmodium falciparum msp1 gene for merozoite surface protein-1, complete cds, isolate: FCR3
ATGAAGATCATATTCTTTTTATGTTCATTTCTTTTTTTTATTATAAATACACAATGTGTAACACATGAAA
GTTATCAAGAACTTGTCAAAAAACTAGAAGCTTTAGAAGATGCAGTATTGACAGGTTATAGTTTATTTCA
AAAGGAAAAAATGGTATTAAATGAAGGAACAAGTGGAACAGCTGTTACAACTAGTACACCTGGTTCAAAG
GGTTCAGTTGCTTCAGGTGGTTCAGGTGGCTCAGTTGCTTCAGGTGGCTCAGTTGCTTCAGGTGGCTCAG
TTGCTTCAGGTGGTTCAGGTAATTCAAGACGTACAAATCCTTCAGATAATTCAAGTGATTCAGATGCTAA
ATCTTACGCTGATTTAAAACACAGAGTACGAAATTACTTGTTAACTATCAAAGAACTCAAATATCCTCAA
CTCTTTGATTTAACTAATCATATGTTAACTTTGTGTGATAATATTCATGGTTTCAAATATTTAATTGATG
GATATGAAGAAATTAATGAATTATTATATAAATTAAACTTTTATTTTGATTTATTAAGAGCAAAATTAAA
TGATGTATGTGCTAATGATTATTGTCAAATACCTTTCAATCTTAAAATTCGTGCAAATGAATTAGACGTA
CTTAAAAAACTTGTGTTCGGATATAGAAAACCATTAGACAATATTAAAGATAATGTAGGAAAAATGGAAG
ATTACATTAAAAAAAATAAAAAAACCATAGAAAATATAAATGAATTAATTGAAGAAAGTAAGAAAACAAT
TGATAAAAATAAGAATGCAACTAAAGAAGAAGAAAAAAAAAAATTATACCAAGCTCAATATGATCTTTCT
ATTTACAATAAACAATTAGAAGAAGCACATAATTTAATAAGCGTTTTAGAAAAACGTATTGACACTTTAA
AAAAAAATGAAAACATTAAGGAATTACTTGATAAGATAAATGAAATTAAAAATCCCCCACCGGCCAATTC
TGGAAATACACCAAATACTCTCCTTGATAAGAACAAAAAAATCGAGGAACACGAAAAAGAAATAAAAGAA
ATTGCCAAAACTATTAAATTTAATATTGATAGTTTATTTACTGATCCACTTGAATTAGAATACTATTTAA
GAGAAAAAAATAAAAATATTGATATAAGTGCAAAGGTTGAAACAAAGGAATCAACTGAACCCAATGAATA
TCCAAATGGAGTTACTTATCCTTTGTCATATAACGATATTAACAATGCTTTAAATGAACTTAATTCTTTT
GGTGATTTAATTAATCCATTTGATTATACAAAAGAACCAAGTAAAAACATATATACTGATAATGAAAGAA
AAAAATTCATAAATGAAATTAAGGAAAAAATTAAAATAGAAAAAAAAAAAATTGAATCTGATAAAAAATC
TTACGAAGACAGATCTAAGTCTTTAAATGATATAACAAAAGAATATGAAAAATTACTTAATGAAATTTAT
GATAGCAAATTCAATAATAATATAGATTTAACTAATTTCGAAAAAATGATGGGTAAAAGATATTCATATA
AAGTTGAGAAACTTACACACCATAATACTTTTGCATCCTATGAAAATTCTAAACATAATCTTGAAAAGTT
AACAAAAGCTCTTAAATATATGGAAGATTATTCTTTAAGGAATATAGTAGTTGAAAAAGAATTAAAATAT
TATAAAAATTTAATAAGCAAAATAGAAAATGAGATTGAAACATTAGTTGAAAATATTAAAAAAGATGAAG
AACAGCTTTTTGAAAAAAAAATTACTAAAGACGAAAATAAACCAGATGAAAAAATTTTAGAAGTATCTGA
CATTGTAAAAGTACAAGTTCAAAAAGTTTTATTAATGAACAAAATTGACGAATTAAAAAAGACTCAATTG
ATTTTAAAAAATGTAGAATTAAAACATAATATACATGTTCCCAATTCTTACAAACAAGAAAATAAGCAAG
AACCTTATTATTTAATTGTGTTGAAAAAAGAAATTGATAAATTAAAAGTGTTCATGCCTAAGGTAGAATC
ATTGATAAATGAAGAAAAAAAAAACATAAAAACAGAAGGTCAATCGGATAATTCGGAACCATCAACCGAA
GGAGAAATAACAGGACAAGCAACTACAAAACCTGGACAACAAGCAGGATCTGCTTTAGAAGGAGATTCAG
TACAAGCACAAGCACAAGAACAAAAACAAGCACAACCACCAGTACCAGTACCAGTACCAGAAGCAAAAGC
ACAAGTCCCAACACCACCAGCACCAGTAAATAATAAAACTGAAAATGTTTCCAAATTAGATTATCTTGAA
AAATTATATGAATTTTTAAATACTTCATATATATGTCACAAATATATTTTGGTTTCACACTCAACTATGA
ACGAAAAGATATTAAAACAATATAAAATTACAAAGGAGGAAGAAAGCAAATTAAGTTCATGTGATCCATT
AGACTTATTGTTTAATATACAAAATAACATACCTGTAATGTATTCTATGTTTGATAGCTTAAACAATAGT
TTATCACAACTATTTATGGAAATTTATGAAAAAGAAATGGTTTGTAATTTATATAAACTTAAGGATAATG
ACAAAATTAAAAATTTATTAGAGGAAGCGAAAAAAGTATCCACATCTGTAAAAACTCTTTCAAGTTCATC
AATGCAACCATTATCATTAACACCTCAGGATAAACCCGAAGTAAGTGCAAATGATGATACATCACATTCT
ACAAATTTGAATAATAGTTTAAAATTATTTGAAAACATATTGAGTCTTGGAAAAAACAAAAATATATACC
AAGAATTAATAGGTCAAAAAAGTAGTGAAAACTTTTATGAAAAGATATTAAAAGATAGTGATACATTTTA
TAATGAATCTTTTACAAATTTTGTAAAATCTAAAGCTGATGATATTAATTCATTGAATGATGAATCAAAA
AGGAAGAAATTAGAAGAAGATATTAATAAATTAAAAAAAACTTTACAGTTATCATTTGATTTATATAATA
AATATAAATTAAAATTAGAAAGATTATTTGATAAAAAGAAAACAGTTGGTAAATATAAAATGCAAATTAA
AAAACTTACTTTATTAAAAGAACAATTAGAATCAAAATTGAATTCACTTAATAACCCAAAGCATGTATTA
CAAAACTTTTCTGTTTTCTTTAACAAAAAAAAAGAAGCTGAAATAGCAGAAACTGAAAACACATTAGAAA
ACACAAAAATATTATTGAAACATTATAAAGGACTTGTTAAATATTATAATGGTGAATCATCTCCATTAAA
AACTTTAAGTGAAGAATCAATTCAAACAGAAGATAATTATGCCAGTTTAGAAAACTTTAAAGTATTAAGT
AAATTAGAAGGAAAATTAAAGGATAATTTAAATTTAGAAAAGAAAAAATTATCATACTTATCAAGTGGAT
TACATCATTTAATTGCTGAATTAAAAGAAGTAATAAAAAATAAAAATTATACAGGTAATTCTCCAAGTGA
AAATAATACGGATGTTAACAATGCATTAGAATCTTACAAAAAATTTCTCCCAGAAGGAACAGATGTTGCA
ACAGTTGTAAGTGAAAGTGGATCCGACACATTAGAACAAAGTCAACCAAAGAAACCAGCATCAACTCATG
TAGGAGCAGAGTCTAACACAATAACAACATCACAAAATGTCGATGATGAAGTAGATGACGTAATCATAGT
ACCTATATTTGGAGAATCCGAAGAAGATTATGATGATTTAGGACAAGTAGTAACAGGAGAAGCAGTAACT
CCTTCCGTAATTGATAACATACTTTCTAAAATTGAAAATGAATATGAGGTTTTATATTTAAAACCTTTAG
CAGGTGTTTATAGAAGTTTAAAAAAACAATTAGAAAATAACGTTATGACATTTAATGTTAATGTTAAGGA
TATTTTAAATTCACGATTTAATAAACGTGAAAATTTCAAAAATGTTTTAGAATCAGATTTAATTCCATAT
AAAGATTTAACATCAAGTAATTATGTTGTCAAAGATCCATATAAATTTCTTAATAAAGAAAAAAGAGATA
AATTCTTAAGCAGTTATAATTATATTAAGGATTCAATAGATACGGATATAAATTTTGCAAATGATGTTCT
TGGATATTATAAAATATTATCCGAAAAATATAAATCAGATTTAGATTCAATTAAAAAATATATCAACGAC
AAACAAGGTGAAAATGAGAAATACCTTCCCTTTTTAAACAATATTGAGACCTTATATAAAACAGTTAATG
ATAAAATTGATTTATTTGTAATTCATTTAGAAGCAAAAGTTCTAAATTATACATATGAGAAATCAAACGT
AGAAGTTAAAATAAAAGAACTTAATTACTTAAAAACAATTCAAGACAAATTGGCAGATTTTAAAAAAAAT
AACAATTTCGTTGGAATTGCTGATTTATCAACAGATTATAACCATAATAACTTATTGACAAAGTTCCTTA
GTACAGGTATGGTTTTTGAAAATCTTGCTAAAACCGTTTTATCTAATTTACTTGATGGAAACTTGCAAGG
TATGTTAAACATTTCACAACACCAATGCGTAAAAAAACAATGTCCACAAAATTCTGGATGTTTCAGACAT
TTAGATGAAAGAGAAGAATGTAAATGTTTATTAAATTACAAACAAGAAGGTGATAAATGTGTTGAAAATC
CAAATCCTACTTGTAACGAAAATAATGGTGGATGTGATGCAGATGCCAAATGTACCGAAGAAGATTCAGG
TAGCAACGGAAAGAAAATCACATGTGAATGTACTAAACCTGATTCTTATCCACTTTTCGATGGTATTTTC
TGCAGTTCCTCTAACTTCTTAGGAATATCATTCTTATTAATACTCATGTTAATATTATACAGTTTCATTT
AA

>AB276006.1 Plasmodium falciparum msp1 gene for merozoite surface protein-1, complete cds, isolate: T9/94
ATGAAGATCATATTCTTTTTATGTTCATTTCTTTTTTTTATTATAAATACACAATGTGTAACACATGAAA
GTTATCAAGAACTTGTCAAAAAACTAGAAGCTTTAGAAGATGCAGTATTGACAGGTTATAGTTTATTTCA
AAAGGAAAAAATGGTATTAAATGAAGGAACAAGTGGAACAGCTGTTACAACTAGTACACCTGGTTCAAAG
GGTTCAGTTGCTTCAGGTGGTTCAGGTGGCTCAGTTGCTTCAGGTGGCTCAGTTGCTTCAGGTGGCTCAG
TTGCTTCAGGTGGCTCAGTTGCTTCAGGTGGTTCAGGTAATTCAAGACGTACAAATCCTTCAGATAATTC
AAGTGATTCAGATGCTAAATCTTACGCTGATTTAAAACACAGAGTACGAAATTACTTGTTAACTATCAAA
GAACTCAAATATCCTCAACTCTTTGATTTAACTAATCATATGTTAACTTTGTGTGATAATATTCATGGTT
TCAAATATTTAATTGATGGATATGAAGAAATTAATGAATTATTATATAAATTAAACTTTTATTTTGATTT
ATTAAGAGCAAAATTAAATGATGTATGTGCTAATGATTATTGTCAAATACCTTTCAATCTTAAAATTCGT
GCAAATGAATTAGACGTACTTAAAAAACTTGTGTTCGGATATAGAAAACCATTAGACAATATTAAAGATA
ATGTAGGAAAAATGGAAGATTACATTAAAAAAAATAAAAAAACCATAGAAAATATAAATGAATTAATTGA
AGAAAGTAAGAAAACAATTGATAAAAATAAGAATGCAACTAAAGAAGAAGAAAAAAAAAAATTATACCAA
GCTCAATATGATCTTTCTATTTACAATAAACAATTAGAAGAAGCACATAATTTAATAAGCGTTTTAGAAA
AACGTATTGACACTTTAAAAAAAAATGAAAACATTAAGGAATTACTTGATAAGATAAATGAAATTAAAAA
TCCCCCACCGGCCAATTCTGGAAATACACCAAATACTCTCCTTGATAAGAACAAAAAAATCGAGGAACAC
GAAAAAGAAATAAAAGAAATTGCCAAAACTATTAAATTTAATATTGATAGTTTATTTACTGATCCACTTG
AATTAGAATACTATTTAAGAGAAAAAAATAAAAATATTGATATAAGTGCAAAGGTTGAAACAAAGGAATC
AACTGAACCCAATGAATATCCAAATGGAGTTACTTATCCTTTGTCATATAACGATATTAACAATGCTTTA
AATGAACTTAATTCTTTTGGTGATTTAATTAATCCATTTGATTATACAAAAGAACCAAGTAAAAACATAT
ATACTGATAATGAAAGAAAAAAATTCATAAATGAAATTAAGGAAAAAATTAAAATAGAAAAAAAAAAAAT
TGAATCTGATAAAAAATCTTACGAAGACAGATCTAAGTCTTTAAATGATATAACAAAAGAATATGAAAAA
TTACTTAATGAAATTTATGATAGCAAATTCAATAATAATATAGATTTAACTAATTTCGAAAAAATGATGG
GTAAAAGATATTCATATAAAGTTGAGAAACTTACACACCATAATACTTTTGCATCCTATGAAAATTCTAA
ACATAATCTTGAAAAGTTAACAAAAGCTCTTAAATATATGGAAGATTATTCTTTAAGGAATATAGTAGTT
GAAAAAGAATTAAAATATTATAAAAATTTAATAAGCAAAATAGAAAATGAGATTGAAACATTAGTTGAAA
ATATTAAAAAAGATGAAGAACAGCTTTTTGAAAAAAAAATTACTAAAGACGAAAATAAACCAGATGAAAA
AATTTTAGAAGTATCTGACATTGTAAAAGTACAAGTTCAAAAAGTTTTATTAATGAACAAAATTGACGAA
TTAAAAAAGACTCAATTGATTTTAAAAAATGTAGAATTAAAACATAATATACATGTTCCCAATTCTTACA
AACAAGAAAATAAGCAAGAACCTTATTATTTAATTGTGTTGAAAAAAGAAATTGATAAATTAAAAGTGTT
CATGCCTAAGGTAGAATCATTGATAAATGAAGAAAAAAAAAACATAAAAACAGAAGGTCAATCGGATAAT
TCGGAACCATCAACCGAAGGAGAAATAACAGGACAAGCAACTACAAAACCTGGACAACAAGCAGGATCTG
CTTTAGAAGGAGATTCAGTACAAGCACAAGCACAAGAACAAAAACAAGCACAACCACCAGTACCAGTACC
AGTACCAGAAGCAAAAGCACAAGTCCCAACACCACCAGCACCAGTAAATAATAAAACTGAAAATGTTTCC
AAATTAGATTATCTTGAAAAATTATATGAATTTTTAAATACTTCATATATATGTCACAAATATATTTTGG
TTTCACACTCAACTATGAACGAAAAGATATTAAAACAATATAAAATTACAAAGGAGGAAGAAAGCAAATT
AAGTTCATGTGATCCATTAGACTTATTGTTTAATATACAAAATAACATACCTGTAATGTATTCTATGTTT
GATAGCTTAAACAATAGTTTATCACAACTATTTATGGAAATTTATGAAAAAGAAATGGTTTGTAATTTAT
ATAAACTTAAGGATAATGACAAAATTAAAAATTTATTAGAGGAAGCGAAAAAAGTATCCACATCTGTAAA
AACTCTTTCAAGTTCATCAATGCAACCATTATCATTAACACCTCAGGATAAACCCGAAGTAAGTGCAAAT
GATGATACATCACATTCTACAAATTTGAATAATAGTTTAAAATTATTTGAAAACATATTGAGTCTTGGAA
AAAACAAAAATATATACCAAGAATTAATAGGTCAAAAAAGTAGTGAAAACTTTTATGAAAAGATATTAAA
AGATAGTGATACATTTTATAATGAATCTTTTACAAATTTTGTAAAATCTAAAGCTGATGATATTAATTCA
TTGAATGATGAATCAAAAAGGAAGAAATTAGAAGAAGATATTAATAAATTAAAAAAAACTTTACAGTTAT
CATTTGATTTATATAATAAATATAAATTAAAATTAGAAAGATTATTTGATAAAAAGAAAACAGTTGGTAA
ATATAAAATGCAAATTAAAAAACTTACTTTATTAAAAGAACAATTAGAATCAAAATTGAATTCACTTAAT
AACCCAAAGCATGTATTACAAAACTTTTCTGTTTTCTTTAACAAAAAAAAAGAAGCTGAAATAGCAGAAA
CTGAAAACACATTAGAAAACACAAAAATATTATTGAAACATTATAAAGGACTTGTTAAATATTATAATGG
TGAATCATCTCCATTAAAAACTTTAAGTGAAGAATCAATTCAAACAGAAGATAATTATGCCAGTTTAGAA
AACTTTAAAGTATTAAGTAAATTAGAAGGAAAATTAAAGGATAATTTAAATTTAGAAAAGAAAAAATTAT
CATACTTATCAAGTGGATTACATCATTTAATTGCTGAATTAAAAGAAGTAATAAAAAATAAAAATTATAC
AGGTAATTCTCCAAGTGAAAATAATACGGATGTTAACAATGCATTAGAATCTTACAAAAAATTTCTCCCA
GAAGGAACAGATGTTGCAACAGTTGTAAGTGAAAGTGGATCCGACACATTAGAACAAAGTCAACCAAAGA
AACCAGCATCAACTCATGTAGGAGCAGAGTCTAACACAATAACAACATCACAAAATGTCGATGATGAAGT
AGATGACGTAATCATAGTACCTATATTTGGAGAATCCGAAGAAGATTATGATGATTTAGGACAAGTAGTA
ACAGGAGAAGCAGTAACTCCTTCCGTAATTGATAACATACTTTCTAAAATTGAAAATGAATATGAGGTTT
TATATTTAAAACCTTTAGCAGGTGTTTATAGAAGTTTAAAAAAACAATTAGAAAATAACGTTATGACATT
TAATGTTAATGTTAAGGATATTTTAAATTCACGATTTAATAAACGTGAAAATTTCAAAAATGTTTTAGAA
TCAGATTTAATTCCATATAAAGATTTAACATCAAGTAATTATGTTGTCAAAGATCCATATAAATTTCTTA
ATAAAGAAAAAAGAGATAAATTCTTAAGCAGTTATAATTATATTAAGGATTCAATAGATACGGATATAAA
TTTTGCAAATGATGTTCTTGGATATTATAAAATATTATCCGAAAAATATAAATCAGATTTAGATTCAATT
AAAAAATATATCAACGACAAACAAGGTGAAAATGAGAAATACCTTCCCTTTTTAAACAATATTGAGACCT
TATATAAAACAGTTAATGATAAAATTGATTTATTTGTAATTCATTTAGAAGCAAAAGTTCTAAATTATAC
ATATGAGAAATCAAACGTAGAAGTTAAAATAAAAGAACTTAATTACTTAAAAACAATTCAAGACAAATTG
GCAGATTTTAAAAAAAATAACAATTTCGTTGGAATTGCTGATTTATCAACAGATTATAACCATAATAACT
TATTGACAAAGTTCCTTAGTACAGGTATGGTTTTTGAAAATCTTGCTAAAACCGTTTTATCTAATTTACT
TGATGGAAACTTGCAAGGTATGTTAAACATTTCACAACACCAATGCGTAAAAAAACAATGTCCACAAAAT
TCTGGATGTTTCAGACATTTAGATGAAAGAGAAGAATGTAAATGTTTATTAAATTACAAACAAGAAGGTG
ATAAATGTGTTGAAAATCCAAATCCTACTTGTAACGAAAATAATGGTGGATGTGATGCAGATGCCAAATG
TACCGAAGAAGATTCAGGTAGCAACGGAAAGAAAATCACATGTGAATGTACTAAACCTGATTCTTATCCA
CTTTTCGATGGTATTTTCTGCAGTTCCTCTAACTTCTTAGGAATATCATTCTTATTAATACTCATGTTAA
TATTATACAGTTTCATTTAA

>AB276007.1 Plasmodium falciparum msp1 gene for merozoite surface protein-1, complete cds, isolate: T9/96
ATGAAGATCATATTCTTTTTATGTTCATTTCTTTTTTTTATTATAAATACACAATGTGTAACACATGAAA
GTTATCAAGAACTTGTCAAAAAACTAGAAGCTTTAGAAGATGCAGTATTGACAGGTTATAGTTTATTTCA
AAAGGAAAAAATGGTATTAAATGAAGAAGAAATTACTACAAAAGGTGCAAGTGCTCAAAGTGGTGCAAGT
GCTCAAAGTGGTGCAAGTGCTCAAAGTGGTGCAAGTGCTCAAAGTGGTACAAGTGGTCCAAGTGGTCCAA
GTGGTACAAGTCCATCATCTCGTTCAAACACTTTACCTCGTTCAAATACTTCATCTGGTGCAAGCCCTCC
AGCTGATGCAAGCGATTCAGATGCTAAATCTTACGCTGATTTAAAACACAGAGTACGAAATTACTTGTTC
ACTATTAAAGAACTCAAATATCCCGAACTCTTTGATTTAACCAATCATATGTTAACTTTGTGTGATAATA
TTCATGGTTTCAAATATTTAATTGATGGATATGAAGAAATTAATGAATTATTATATAAATTAAACTTTTA
TTTTGATTTATTAAGAGCAAAATTAAATGATGTATGTGCTAATGATTATTGTCAAATACCTTTCAATCTT
AAAATTCGTGCAAATGAATTAGACGTACTTAAAAAACTTGTGTTCGGATATAGAAAACCATTAGACAATA
TTAAAGATAATGTAGGAAAAATGGAAGATTACATTAAAAAAAATAAAACAACCATAGCAAATATAAATGA
ATTAATTGAAGGAAGTAAGAAAACAATTGATCAAAATAAGAATGCAGATAATGAAGAAGGAAAAAAAAAA
TTATACCAAGCTCAATATGATCTTTCTATTTACAATAAACAATTAGAAGAAGCACATAATTTAATAAGCG
TTTTAGAAAAACGTATTGACACTTTAAAAAAAAATGAAAACATAAAGAAATTACTTGAAGATATAGATAA
AATTAAAACAGATGCCGAAAAACTCACTACTGGAAGTAAACCAAATCCTCTCCCTGAGAATAAGAAAAAA
GAAGTCGAGGGACACGAAGAAAAAATAAAAGAAATTGCCAAAACTATTAAATTTAACATTGATAGTTTAT
TTACTGATCCACTTGAATTAGAATATTATTTAAGAGAAAAAAATAAAAAAGTTGATGTAACACCTAAATC
ACAAGATCCTACGAAATCTGTTCAAATACCAAAAGTTCCTTATCCAAATGGTATTGTATATCCTTTACCA
CTCACTGATATTCATAATTCATTAGCTGCAGATAATGATAAAAATTCATATGGTGATTTAATGAATCCTC
ATACTAAAGAAAAAATTAATGAAAAAATTATTACAGATAATAAGGAAAGAAAAATATTCATTAATAACAT
TAAAAAACAAATTGATTTAGAAGAAAAAAACATTAATCACACAAAAGAACAAAATAAAAAATTACTTGAA
GATTATGAAAAGTCAAAAAAGGATTATGAAGAATTACTTGAAAAATTTTATGAAATGAAATTTAATAATA
ATTTTGACAAAGATGTCGTAGATAAAATATTCAGTGCAAGATATACATATAATGTTGAAAAACAAAGATA
TAATAATAAATTTTCATCCTCTAATAATTCTGTATATAATGTTCAAAAATTAAAAAAGGCTCTTTCATAT
CTTGAAGATTATTCTTTAAGAAAAGGAATTTCTGAAAAAGATTTTAATCATTATTATACTTTGAAAACTG
GCCTCGAAGCTGATATAAAAAAATTAACAGAAGAAATAAAGAGTAGTGAAAACAAAATTCGAGAAAAAAA
TTTTAAAGGACTAACACATTCAGCAAATGCTTCCTTAGAAGTATCTGATATTGTAAAATTACAAGTACAA
AAAGTTTTATTAATTAAAAAAATAGAAGACTTAAGAAAGATAGAATTATTTTTAAAAAATGCACAACTAA
AAGATAGTATTCATGTACCAAATATTTATAAACCACAAAATAAACCAGAACCATATTATTTAATTGTATT
AAAAAAAGAAGTAGATAAATTAAAAGAATTTATACCAAAAGTAAAAGACATGTTAAAGAAAGAACAAGCT
GTCTTATCAAGTATTACACAACCTTTAGTTGCAGCAAGCGAAACAACTGAAGATGGGGGTCACTCCACAC
ACACATTATCCCAATCAGGAGAAACAGAAGTAACAGAAGAAACAGAAGTAACAGAAGAAACAGTAGGACA
CACAACAACGGTAACAATAACATTACCACCAACACAACCATCACCACCAAAAGAAGTAAAAGTTGTTGAA
AATTCAATAGAACATAAGAGTAATGACAATTCACAAGCCTTGACAAAAACAGTTTATCTAAAGAAATTAG
ATGAATTTTTAACTAAATCATATATATGTCATAAATATATTTTAGTATCAAACTCTAGTATGGACCAAAA
ATTATTAGAGGTATATAATCTTACTCCAGAAGAAAAAAATGAATTAAAATCATGTGATCCATTAGATTTA
TTATTTAATATTCAAAATAACATACCTGCTATGTATTCATTATATGATAGTATGAACAATGATTTACAAC
ATCTCTTTTTTGAATTATATCAAAAGGAAATGATTTATTATTTACATAAACTAAAAGAGGAAAATCACAT
CAAAAAATTATTAGAGGAGCAAAAACAAATAACTGGAACATCATCTACATCCAGTCCTGGAAATACAACC
GTAAATACTGCTCAATCCGCAACTCACAGTAATTCCCAAAACCAACAATCAAATGCATCCTCTACCAATA
CCCAAAATGGTGTAGCTGTATCATCTGGTCCTGCTGTAGTTGAAGAAAGTCATGATCCCTTAACAGTATT
GTCTATTAGTAACGATTTGAAAGGTATTGTTAGTCTCTTAAATCTTGGAAATAAAACTAAAGTACCTAAT
CCATTAACCATTTCTACAACAGAGATGGAAAAATTTTATGAGAATATTTTAAAAAATAATGATACCTATT
TTAATGATGATATCAAACAATTCGTAAAATCTAATTCAAAAGTAATTACAGGTTTGACCGAAACACAAAA
AAATGCATTAAATGATGAAATTAAAAAATTAAAAGATACTTTACAGTTATCATTTGATTTATATAATAAA
TATAAATTAAAATTAGATAGATTATTTAATAAGAAAAAAGAACTTGGCCAAGACAAAATGCAAATTAAAA
AACTTACTTTATTAAAAGAACAATTAGAATCAAAATTGAATTCACTTAATAACCCACATAATGTATTACA
AAACTTTTCTGTTTTCTTTAACAAAAAAAAAGAAGCTGAAATAGCAGAAACTGAAAACACATTAGAAAAC
ACAAAAATATTATTGAAACATTATAAAGGACTTGTTAAATATTATAATGGTGAATCATCTCCATTAAAAA
CTTTAAGTGAAGTATCAATTCAAACAGAAGATAATTATGCCAATTTAGAAAAATTTAGAGTATTAAGTAA
AATAGATGGAAAACTCAATGATAATTTACATTTAGGAAAGAAAAAATTATCTTTCTTATCAAGTGGATTA
CATCATTTAATTACTGAATTAAAAGAAGTAATAAAAAATAAAAATTATACAGGTAATTCTCCAAGTGAAA
ATAATAAGAAAGTTAACGAAGCTTTAAAATCTTACGAAAATTTTCTCCCAGAAGCAAAAGTTACAACAGT
TGTAACTCCACCTCAACCAGATGTAACTCCATCTCCATTATCTGTAAGGGTAAGTGGTAGTTCAGGATCC
ACAAAAGAAGAAACACAAATACCAACTTCAGGCTCTTTATTAACAGAATTACAACAAGTAGTACAATCAC
AAAATTATGACGAAGAAGATGATTCCTTAGTTGTATTACCCATTTTTGGAGAATCCGAAGATAATGACGA
ATATTTAGATCAAGTAGTAACTGGAGAAGCAATATCTGTCACAATGGATAATATCCTCTCAGGATTTGAA
AATGAATATGATGTTATATATTTAAAACCTTTAGCTGGAGTATATAGAAGCTTAAAAAAACAAATTGAAA
AAAACATTTTTACATTTAATTTAAATTTGAACGATATCTTAAATTCACGTCTTAAGAAACGAAAATATTT
CTTAGATGTATTAGAATCTGATTTAATGCAATTTAAACATATATCCTCAAATGAATACATTATTGAAGAT
TCATTTAAATTATTGAATTCAGAACAAAAAAACACACTTTTAAAAAGTTACAAATATATAAAAGAATCAG
TAGAAAATGATATTAAATTTGCACAGGAAGGTATAAGTTATTATGAAAAGGTTTTAGCGAAATATAAGGA
TGATTTAGAATCAATTAAAAAAGTTATCAAAGAAGAAAAGGAGAAGTTCCCATCATCACCACCAACAACA
CCTCCGTCACCAGCAAAAACAGACGAACAAAAGAAGGAAAGTAAGTTCCTTCCATTTTTAACAAACATTG
AGACCTTATACAATAACTTAGTTAATAAAATTGACGATTACTTAATTAACTTAAAGGCAAAGATTAACGA
TTGTAATGTTGAAAAAGATGAAGCACATGTTAAAATAACTAAACTTAGTGATTTAAAAGCAATTGATGAC
AAAATAGATCTTTTTAAAAACCCTTACGACTTCGAAGCAATTAAAAAATTGATAAATGATGATACGAAAA
AAGATATGCTTGGCAAATTACTTAGTACAGGATTAGTTCAAAATTTTCCTAATACAATAATATCAAAATT
AATTGAAGGAAAATTCCAAGATATGTTAAACATTTCACAACACCAATGCGTAAAAAAACAATGTCCAGAA
AATTCTGGATGTTTCAGACATTTAGATGAAAGAGAAGAATGTAAATGTTTATTAAATTACAAACAAGAAG
GTGATAAATGTGTTGAAAATCCAAATCCTACTTGTAACGAAAATAATGGTGGATGTGATGCAGATGCCAC
ATGTACCGAAAAAGATTCAGGTAGCAGCGGAAAGAAAATCACATGTGAATGTACTAAACCTGATTCTTAT
CCACTTTTCGATGGTATTTTCTGCAGTTCCTCTAACTTCTTAGGAATATCATTCTTATTAATACTCATGT
TAATATTATACAGTTTCATTTAA

>AB276008.1 Plasmodium falciparum msp1 gene for merozoite surface protein-1, complete cds, isolate: T9/102
ATGAAGATCATATTCTTTTTATGTTCATTTCTTTTTTTTATTATAAATACACAATGTGTAACACATGAAA
GTTATCAAGAACTTGTCAAAAAACTAGAAGCTTTAGAAGATGCAGTATTGACAGGTTATGGTTTATTTCA
TAAGGAAAAAATGATCTTAAATGAAGAAGAAATTACTACAAAAGGTGCAAGTGCTCAAAGTGGTACAAGT
GGTACAAGTGGTACAAGTGGTACAAGTGGTACAAGTGGTCCAAGTGGTCCAAGTGGTACAAGTCCATCAT
CTCGTTCAAACACTTTACCTCGTTCAAATACTTCATCTGGTGCAAGCCCTCCAGCTGATGCAAGCGATTC
AGATGCTAAATCTTACGCTGATTTAAAACACAGAGTACGAAATTACTTGTTCACTATTAAAGAACTCAAA
TATCCCGAACTCTTTGATTTAACCAATCATATGTTAACTTTGTGTGATAATATTCATGGTTTCAAATATT
TAATTGATGGATATGAAGAAATTAATGAATTATTATATAAATTAAACTTTTATTTTGATTTATTAAGAGC
AAAATTAAATGATGCATGTGCCAATAGTTATTGTCAAATACCTTTCAATCTTAAAATTCGTGCAAATGAA
TTAGACGTACTTAAAAAACTTGTGTTCGGATATAGAAAACCATTAGACAATATTAAAGATAATGTAGGAA
AAATGGAAGATTACATTAAAAAAAATAAAACAACCATAGCAAATATAAATGAATTAATTGAAGGAAGTAA
GAAAACAATTGATCAAAATAAGAATGCAGATAATGAAGAAGGAAAAAAAAAATTATACCAAGCTCAATAT
AATCTTTTTATTTACAATAAACAATTACAAGAAGCACATAATTTAATAAGCGTTTTAGAAAAACGTATTG
ACACTTTAAAAAAAAATGAAAACATAAAGAAATTACTTGAAGATATAGATAAAATTAAAACAGATGCCGA
AAAACTCACTACTGGAAGTAAACCAAATCCTCTCCCTGAGAATAAGAAAAAAGAAGTCGAGGGACACGAA
GAAAAAATAAAAGAAATTGCCAAAACTATTAAATTTAACATTGATAGTTTATTTACTGATCCACTTGAAT
TAGAATATTATTTAAGAGAAAAAAATAAAAAAGTTGATGTAACACCTAAATCACAAGATCCTACGAAATC
TGTTCAAATACCAAAAGTTCCTTATCCAAATGGTATTGTATATCCTTTACCACTCACTGATATTCATAAT
TCATTAGCTGCAGATAATGATAAAAATTCATATGGTGATTTAATGAATCCTGATACTAAAGAAAAAATTA
ATGAAAAAATTATTACAGATAATAAGGAAAGAAAAATATTCATTAATAACATTAAAAAACAAATTGATTT
AGAAGAAAAAAACATTAATCACACAAAAGAACAAAATAAAAAATTACTTGAAGATTATGAAAAGTCAAAA
AAGGATTATGAAGAATTACTTGAAAAATTTTATGAAATGAAATTTAATAATAATTTTAACAAAGATGTCG
TAGATAAAATGTTCAGTGCAAGATATACATATAATGTTGAAAAACAAAGATATAATAATAAATTTTCATC
CTCTAATAATTCTGTATATAATGTTCAAAAATTAAAAAAGGCTCTTTCATATCTTGAAGATTATTCTTTA
AGAAAAGGAATTTCTGAAAAAGATTTTAATCATTATTATACTTTGAAAACTGGCCTCGAAGCTGATATAA
AAAAATTAACAGAAGAAATAAAGAGTAGTGAAAACAAAATTTTAGAAAAAAATTTTAAAGGACTAACACA
TTCAGCAAATGCTTCCTTAGAAGTATCTGATATTGTAAAATTACAAGTACAAAAAGTTTTATTAATTAAA
AAAATAGAAGACTTAAGAAAGATAGAATTATTTTTAAAAAATGCACAACTAAAAGATAGTATTCATGTAC
CAAATATTTATAAACCACAAAATAAACCAGAACCATATTATTTAATTGTATTAAAAAAAGAAGTAGATAA
ATTAAAAGAATTTATACCAAAAGTAAAAGACATGTTAAAGAAAGAACAAGCTGTCTTATCAAGTATTACA
CAACCTTTAGTTGCAGCAAGCGAAACAACTGAAGATGGGGGTCACTCCACACACACATTATCCCAATCAG
GAGAAACAGAAGTAACAGAAGAAACAGTAGGACACACAACAACGGTAACAATAACATTACCACCAAAAGA
AGAATCAGCACCAAAAGAAGTAAAAGTTGTTGAAAATTCAATAGAACATAAGAGTAATGACAATTCACAA
GCCTTGACAAAAACAGTTTATCTAAAGAAATTAGATGAATTTTTAACTAAATCATATATATGTCATAAAT
ATATTTTAGTATCAAACTCTAGTATGGACCAAAAATTATTAGAGGTATATAATCTTACTCCAGAAGAAAA
AAATGAATTAAAATCATGTGATCCATTAGATTTATTATTTAATATTCAAAATAACATACCTGCTATGTAT
TCATTATATGATAGTATGAACAATGATTTACAACATCTCTTTTTTGAATTATATCAAAAGGAAATGATTT
ATTATTTACATAAACTAAAAGAGGAAAATCACATCAAAAAATTATTAGAGGAGCAAAAACAAATAACTGG
AACATCATCTACATCCAGTCCTGGAAATACAACCGTAAATACTGCTCAATCCGCAACTCACAGTAATTCC
CAAAACCAACAATCAAATGCATCCTCTACCAATACCCAAAATGGTGTAGCTGTATCATCTGGTCCTGCTG
TAGTTGAAGAAAGTCATGATCCCTTAACAGTATTGTCTATTAGTAACGATTTGAAAGGTATTGTTAGTCT
CTTAAATCTTGGAAATAAAACTAAAGTACCTAATCCATTAACCATTTCTACAACAGAGATGGAAAAATTT
TATGAGAATATTTTAAAAAATAATGATACCTATTTTAATGATGATATCAAACAATTCGTAAAATCTAATT
CAAAAGTAATTACAGGTTTGACCGAAACACAAAAAAATGCATTAAATGATGAAATTAAAAAATTAAAAGA
TACTTTACAGTTATCATTTGATTTATATAATAAATATAAATTAAAATTAGATAGATTATTTAATAAGAAA
AAAGAACTTGGCCAAGACAAAATGCAAATTAAAAAACTTACTTTATTAAAAGAACAATTAGAATCAAAAT
TGAATTCACTTAATAACCCACATAATGTATTACAAAACTTTTCTGTTTTCTTTAACAAAAAAAAAGAAGC
TGAAATAGCAGAAACTGAAAACACATTAGAAAACACAAAAATATTATTGAAACATTATAAAGGACTTGTT
AAATATTATAATGGTGAATCATCTCCATTAAAAACTTTAAGTGAAGTATCAATTCAAACAGAAGATAATT
ATGCCAATTTAGAAAAATTTAGAGTATTAAGTAAAATAGATGGAAAACTCAATGATAATTTACATTTAGG
AAAGAAAAAATTATCTTTCTTATCAAGTGGATTACATCATTTAATTACTGAATTAAAAGAAGTAATAAAA
AATAAAAATTATACAGGTAATTCTCCAAGTGAAAATAATAAGAAAGTTAACGAAGCTTTAAAATCTTACG
AAAATTTTCTCCCAGAAGCAAAAGTTACAACAGTTGTAACTCCACCTCAACCAGATGTAACTCCATCTCC
ATTATCTGTAAGGGTAAGTGGTAGTTCAGGATCCACAAAAGAAGAAACACAAATACCAACTTCAGGCTCT
TTATTAACAGAATTACAACAAGTAGTACAATTACAAAATTATGACGAAGAAGATGATTCCTTAGTTGTAT
TACCCATTTTTGGAGAATCCGAAGATAATGACGAATATTTAGATCAAGTAGTAACTGGAGAAGCAATATC
TGTCACAATGGATAATATCCTCTCAGGATTTGAAAATGAATATGATGTTATATATTTAAAACCTTTAGCT
GGAGTATATAGAAGCTTAAAAAAACAAATTGAAAAAAACATTATTACATTTAATTTAAATTTGAACGATA
TCTTAAATTCACGTCTTAAGAAACGAAAATATTTCTTAGATGTATTAGAATCTGATTTAATGCAATTTAA
ACATATATCCTCAAATGAATACATTATTGAAGATTCATTTAAATTATTGAATTCAGAACAAAAAAACACA
CTTTTAAAAAGTTACAAATATATAAAAGAATCAGTAGAAAATGATATTAAATTTGCACAGGAAGGTATAA
GTTATTATGAAAAGGTTTTAGCGAAATATAAGGATGATTTAGAATCAATTAAAAAAGTTATCAAAGAAGA
AAAGGAGTTCCCATCATCACCACCAACAACACCTCCGTCACCAGCAAAAACAGACGAACAAAAGAAGGAA
AGTAAGTTCCTTCCATTTTTAACAAACATTGAGACCTTATACAATAACTTAGTTAATAAAATTGACGATT
ACTTAATTAACTTAAAGGCAAAGATTAACGATTGTAATGTTGAAAAAGATGAAGCACATGTTAAAATAAC
TAAACTTAGTGATTTAAAAGCAATTGATGACAAAATAGATCTTTTTAAAAACACTAACGACTTCGAAGCA
ATTAAAAAATTGATAAATGATGATACGAAAAAAGATATGCTTGGCAAATTACTTAGTACAGGATTAGTTC
AAAATTTTCCTAATACAATAATATCAAAATTAATTGAAGGAAAATTCCAAGATATGTTAAACATTTCACA
ACACCAATGCGTAAAAAAACAATGTCCAGAAAATTCTGGATGTTTCAGACATTTAGATGAAAGAGAAGAA
TGTAAATGTTTATTAAATTACAAACAAGAAGGTGATAAATGTGTTGAAAATCCAAATCCTACTTGTAACG
AAAATAATGGTGGATGTGATGCAGATGCCAAATGTACCGAAGAAGATTCAGGTAGCAACGGAAAGAAAAT
CACATGTGAATGTACTAAACCTGATTCTTATCCACTTTTCGATGGTATTTTCTGCAGTTCCTCTAACTTC
TTAGGAATATCATTCTTATTAATACTCATGTTAATATTATACAGTTTCATTTAA

>AB276009.1 Plasmodium falciparum msp1 gene for merozoite surface protein-1, complete cds, isolate: T806
ATGAAGATCATATTCTTTTTATGTTCATTTCTTTTTTTTATTATAAATACACAATGTGTAACACATGAAA
GTTATCAAGAACTTGTCAAAAAACTAGAAGCTTTAGAAGATGCAGTATTGACAGGTTATAGTTTATTTCA
AAAGGAAAAAATGGTATTAAATGAAGGAACAAGTGGAACAGCTGTTACAACTAGTACACCTGGTTCAAAG
GGTTCAGTTGCTTCAGGTGGTTCAGGTGGCTCAGTTGCTTCAGGTGGCTCAGTTGCTTCAGGTGGCTCAG
TTGCTTCAGGTGGCTCAGTTGCTTCAGGTGGTTCAGGTAATTCAAGACGTACAAATCCTTCAGATAATTC
AAGTGATTCAGATGCTAAATCTTACGCTGATTTAAAACACAGAGTACGAAATTACTTGTTAACTATCAAA
GAACTCAAATATCCTCAACTCTTTGATTTAACTAATCATATGTTAACTTTGTGTGATAATATTCATGGTT
TCAAATATTTAATTGATGGATATGAAGAAATTAATGAATTATTATATAAATTAAACTTTTATTTTGATTT
ATTAAGAGCAAAATTAAATGATGTATGTGCTAATGATTATTGTCAAATACCTTTCAATCTTAAAATTCGT
GCAAATGAATTAGACGTACTTAAAAAACTTGTGTTCGGATATAGAAAACCATTAGACAATATTAAAGATA
ATGTAGGAAAAATGGAAGATTACATTAAAAAAAATAAAAAAACCATAGAAAATATAAATGAATTAATTGA
AGAAAGTAAGAAAACAATTGATAAAAATAAGAATGCAACTAAAGAAGAAGAAAAAAAAAAATTATACCAA
GCTCAATATGATCTTTCTATTTACAATAAACAATTAGAAGAAGCACATAATTTAATAAGCGTTTTAGAAA
AACGTATTGACACTTTAAAAAAAAATGAAAACATTAAGGAATTACTTGATAAGATAAATGAAATTAAAAA
TCCCCCACCGGCCAATTCTGGAAATACACCAAATACTCTCCTTGATAAGAACAAAAAAATCGAGGAACAC
GAAAAAGAAATAAAAGAAATTGCCAAAACTATTAAATTTAATATTGATAGTTTATTTACTGATCCACTTG
AATTAGAATACTATTTAAGAGAAAAAAATAAAAATATTGATATAAGTGCAAAGGTTGAAACAAAGGAATC
AACTGAACCCAATGAATATCCAAATGGAGTTACTTATCCTTTGTCATATAACGATATTAACAATGCTTTA
AATGAACTTAATTCTTTTGGTGATTTAATTAATCCATTTGATTATACAAAAGAACCAAGTAAAAACATAT
ATACTGATAATGAAAGAAAAAAATTCATAAATGAAATTAAGGAAAAAATTAAAATAGAAAAAAAAAAAAT
TGAATCTGATAAAAAATCTTACGAAGACAGATCTAAGTCTTTAAATGATATAACAAAAGAATATGAAAAA
TTACTTAATGAAATTTATGATAGCAAATTCAATAATAATATAGATTTAACTAATTTCGAAAAAATGATGG
GTAAAAGATATTCATATAAAGTTGAGAAACTTACACACCATAATACTTTTGCATCCTATGAAAATTCTAA
ACATAATCTTGAAAAGTTAACAAAAGCTCTTAAATATATGGAAGATTATTCTTTAAGGAATATAGTAGTT
GAAAAAGAATTAAAATATTATAAAAATTTAATAAGCAAAATAGAAAATGAGATTGAAACATTAGTTGAAA
ATATTAAAAAAGATGAAGAACAGCTTTTTGAAAAAAAAATTACTAAAGACGAAAATAAACCAGATGAAAA
AATTTTAGAAGTATCTGACATTGTAAAAGTACAAGTTCAAAAAGTTTTATTAATGAACAAAATTGACGAA
TTAAAAAAGACTCAATTGATTTTAAAAAATGTAGAATTAAAACATAATATACATGTTCCCAATTCTTACA
AACAAGAAAATAAGCAAGAACCTTATTATTTAATTGTGTTGAAAAAAGAAATTGATAAATTAAAAGTGTT
CATGCCTAAGGTAGAATCATTGATAAATGAAGAAAAAAAAAACATAAAAACAGAAGGTCAATCGGATAAT
TCGGAACCATCAACCGAAGGAGAAATAACAGGACAAGCAACTACAAAACCTGGACAACAAGCAGGATCTG
CTTTAGAAGGAGATTCAGTACAAGCACAAGCACAAGAACAAAAACAAGCACAACCACCAGTACCAGTACC
AGTACCAGAAGCAAAAGCACAAGTCCCAACACCACCAGCACCAGTAAATAATAAAACTGAAAATGTTTCC
AAATTAGATTATCTTGAAAAATTATATGAATTTTTAAATACTTCATATATATGTCACAAATATATTTTGG
TTTCACACTCAACTATGAACGAAAAGATATTAAAACAATATAAAATTACAAAGGAGGAAGAAAGCAAATT
AAGTTCATGTGATCCATTAGACTTATTGTTTAATATACAAAATAACATACCTGTAATGTATTCTATGTTT
GATAGCTTAAACAATAGTTTATCACAACTATTTATGGAAATTTATGAAAAAGAAATGGTTTGTAATTTAT
ATAAACTTAAGGATAATGACAAAATTAAAAATTTATTAGAGGAAGCGAAAAAAGTATCCACATCTGTAAA
AACTCTTTCAAGTTCATCAATGCAACCATTATCATTAACACCTCAGGATAAACCCGAAGTAAGTGCAAAT
GATGATACATCACATTCTACAAATTTGAATAATAGTTTAAAATTATTTGAAAACATATTGAGTCTTGGAA
AAAACAAAAATATATACCAAGAATTAATAGGTCAAAAAAGTAGTGAAAACTTTTATGAAAAGATATTAAA
AGATAGTGATACATTTTATAATGAATCTTTTACAAATTTTGTAAAATCTAAAGCTGATGATATTAATTCA
TTGAATGATGAATCAAAAAGGAAGAAATTAGAAGAAGATATTAATAAATTAAAAAAAACTTTACAGTTAT
CATTTGATTTATATAATAAATATAAATTAAAATTAGAAAGATTATTTGATAAAAAGAAAACAGTTGGTAA
ATATAAAATGCAAATTAAAAAACTTACTTTATTAAAAGAACAATTAGAATCAAAATTGAATTCACTTAAT
AACCCAAAGCATGTATTACAAAACTTTTCTGTTTTCTTTAACAAAAAAAAAGAAGCTGAAATAGCAGAAA
CTGAAAACACATTAGAAAACACAAAAATATTATTGAAACATTATAAAGGACTTGTTAAATATTATAATGG
TGAATCATCTCCATTAAAAACTTTAAGTGAAGAATCAATTCAAACAGAAGATAATTATGCCAGTTTAGAA
AACTTTAAAGTATTAAGTAAATTAGAAGGAAAATTAAAGGATAATTTAAATTTAGAAAAGAAAAAATTAT
CATACTTATCAAGTGGATTACATCATTTAATTGCTGAATTAAAAGAAGTAATAAAAAATAAAAATTATAC
AGGTAATTCTCCAAGTGAAAATAATACGGATGTTAACAATGCATTAGAATCTTACAAAAAATTTCTCCCA
GAAGGAACAGATGTTGCAACAGTTGTAAGTGAAAGTGGATCCGACACATTAGAACAAAGTCAACCAAAGA
AACCAGCATCAACTCATGTAGGAGCAGAGTCTAACACAATAACAACATCACAAAATGTCGATGATGAAGT
AGATGACGTAATCATAGTACCTATATTTGGAGAATCCGAAGAAGATTATGATGATTTAGGACAAGTAGTA
ACAGGAGAAGCAGTAACTCCTTCCGTAATTGATAACATACTTTCTAAAATTGAAAATGAATATGAGGTTT
TATATTTAAAACCTTTAGCAGGTGTTTATAGAAGTTTAAAAAAACAATTAGAAAATAACGTTATGACATT
TAATGTTAATGTTAAGGATATTTTAAATTCACGATTTAATAAACGTGAAAATTTCAAAAATGTTTTAGAA
TCAGATTTAATTCCATATAAAGATTTAACATCAAGTAATTATGTTGTCAAAGATCCATATAAATTTCTTA
ATAAAGAAAAAAGAGATAAATTCTTAAGCAGTTATAATTATATTAAGGATTCAATAGATACGGATATAAA
TTTTGCAAATGATGTTCTTGGATATTATAAAATATTATCCGAAAAATATAAATCAGATTTAGATTCAATT
AAAAAATATATCAACGACAAACAAGGTGAAAATGAGAAATACCTTCCCTTTTTAAACAATATTGAGACCT
TATATAAAACAGTTAATGATAAAATTGATTTATTTGTAATTCATTTAGAAGCAAAAGTTCTAAATTATAC
ATATGAGAAATCAAACGTAGAAGTTAAAATAAAAGAACTTAATTACTTAAAAACAATTCAAGACAAATTG
GCAGATTTTAAAAAAAATAACAATTTCGTTGGAATTGCTGATTTATCAACAGATTATAACCATAATAACT
TATTGACAAAGTTCCTTAGTACAGGTATGGTTTTTGAAAATCTTGCTAAAACCGTTTTATCTAATTTACT
TGATGGAAACTTGCAAGGTATGTTAAACATTTCACAACACCAATGCGTAAAAAAACAATGTCCACAAAAT
TCTGGATGTTTCAGACATTTAGATGAAAGAGAAGAATGTAAATGTTTATTAAATTACAAACAAGAAGGTG
ATAAATGTGTTGAAAATCCAAATCCTACTTGTAACGAAAATAATGGTGGATGTGATGCAGATGCCAAATG
TACCGAAGAAGATTCAGGTAGCAACGGAAAGAAAATCACATGTGAATGTACTAAACCTGATTCTTATCCA
CTTTTCGATGGTATTTTCTGCAGTTCCTCTAACTTCTTAGGAATATCATTCTTATTAATACTCATGTTAA
TATTATACAGTTTCATTTAA

>AB276010.1 Plasmodium falciparum msp1 gene for merozoite surface protein-1, complete cds, isolate: T807
ATGAAGATCATATTCTTTTTATGTTCATTTCTTTTTTTTATTATAAATACACAATGTGTAACACATGAAA
GTTATCAAGAACTTGTCAAAAAACTAGAAGCTTTAGAAGATGCAGTATTGACAGGTTATAGTTTATTTCA
AAAGGAAAAAATGGTATTAAATGAAGGAACAAGTGGAACAGCTGTTACAACTAGTACACCTGGTTCAGGT
GGTTCAGTTACTTCAGGTGGTTCAGTTACTTCAGGTGGTTCAGTTACTTCAGTTGCTTCAGTTGCTTCAG
TTGCTTCAGTTGCTTCAGTTGCTTCAGGTGGTTCAGGTAATTCAAGACGTACAAATCCTTCAGATAATTC
AAGTGATTCAGATGCTAAATCTTACGCTGATTTAAAACATAGAGTTCAAAATTACTTGTTCACTATTAAA
GAACTCAAATATCCCGAACTCTTTGATTTAACCAATCATATGTTAACTTTGTGTGATAATATTCATGGTT
TCAAATATTTAATTGATGGATATGAAGAAATTAATGAATTATTATATAAATTAAACTTTTATTTTGATTT
ATTAAGAGCAAAATTAAATGATGTATGTGCTAATGATTATTGTCAAATACCTTTCAATCTTAAAATTCGT
GCAAATGAATTAGACGTACTTAAAAAACTTGTGTTCGGATATAGAAAACCATTAGACAATATTAAAGATA
ATGTAGGAAAAATGGAAGATTACATTAAAAAAAATAAAACAACCATAGCAAATATAAATGAATTAATTGA
AGGAAGTAAGAAAACAATTGATCAAAATAAGAATGCAGATAATGAAGAAGGAAAAAAAAAATTATACCAA
GCTCAATATAATCTTTTTATTTACAATAAACAATTACAAGAAGCACATAATTTAATAAGCGTTTTAGAAA
AACGTATTGACACTTTAAAAAAAAATGAAAACATAAAGAAATTACTTGAAGATATAGATAAAATTAAAAC
AGATGCCGAAAAACCCACTACTGGAAGTAAACCAAATACTCTCCTTGATAAGAACAAAAAAATCGAGGAA
CACGAAGAAAAAATAAAAGAAATTGCCAAAACTATTAAATTTAACATTGATAGTTTATTTACTGATCCAC
TTGAATTAGAATATTATTTAAGAGAAAAAAATAAAAAAGTTGATGTAACACCTAAATCACAAGATCCTAC
GAAATCTGTTCAAATACCAAAAGTTCCTTATCCAAATGGTATTGTATATCCTTTACCACTCACTGATATT
CATAATTCATTAGCTGCAGATAATGATAAAAATTCATATGGTGATTTAATGAATCCTGATACTAAAGAAA
AAATTAATGAAAAAATTATTACAGATAATAAGGAAAGAAAAATATTCATTAATAACATTAAAAAACAAAT
TGATTTAGAAGAAAAAAACATTAATCACACAAAAGAACAAAATAAAAAATTACTTGAAGATTATGAAAAG
TCAAAAAAGGATTATGAAGAATTACTTGAAAAATTTTATGAAATGAAATTTAATAATAATTTTGACAAAG
ATGTCGTAGATAAAATATTCAGTGCAAGATATACATATAATGTTGAAAAACAAAAATATAATAATAAATT
TTCATCCTCTAATAATTCTGTATATAATGTTCAAAAATTAAAAAAGGCTCTTTCATATCTTGAAGATTAT
TCTTTAAGAAAAGGAATTTCTGAAAAAGATTTTAATCATTATTATACTTTGAAAACTGGCCTCGAAGCTG
ATATAAAAAAATTAACAGAAGAAATAAAGAGTAGTGAAAACAAAATTTTAGAAAAAAATTTTAAAGGACT
AACACATTCAGCAAATGCTTCCTTAGAAGTATCTGATATTGTAAAATTACAAGTACAAAAAGTTTTATTA
ATTAAAAAAATAGAAGACTTAAGAAAGATAGAATTATTTTTAAAAAATGCACAACTAAAAGATAGTATTC
ATGTACCAAATATTTATAAACCACAAAATAAACCAGAACCATATTATTTAATTGTATTAAAAAAAGAAGT
AGATAAATTAAAAGAATTTATACCAAAAGTAAAAGACATGTTAAAGAAAGAACAAGCTGTCTTATCAAGT
ATTACACAACCTTTAGTTGCAGCAAGCGAAACAACTGAAGATGGGGGTCACTCCACACACACATTATCCC
AATCAGGAGAAACAGAAGTAACAGAAGAAACAGTAGGACACACAACAACGGTAACAATAACATTACCACC
AAAAGAAGTAAAAGTTGTTGAAAATTCAATAGAACATAAGAGTAATGACAATTCACAAGCCTTGACAAAA
ACAGTTTATCTAAAGAAATTAGATGAATTTTTAACTAAATCATATATATGTCATAAATATATTTTAGTAT
CAAACTCTAGTATGGACCAAAAATTATTAGAGGTATATAATCTTACTCCAGAAGAAAAAAATGAATTAAA
ATCATGTGATCCATTAGATTTATTATTTAATATTCAAAATAACATACCTGCTATGTATTCATTATATGAT
AGTATGAACAATGATTTACAACATCTCTTTTTTGAATTATATCAAAAGGAAATGATTTATTATTTACATA
AACTAAAAGAGGAAAATCACATCAAAAAATTATTAGAGGAGCAAAAACAAATAACTGGAACATCATCTAC
ATCCAGTCCTGGAAATACAACCGTAAATACTGCTCAATCCGCAACTCACAGTAATTCCCAAAACCAACAA
TCAAATGCATCCTCTACCAATACCCAAAATGGTGTAGCTGTATCATCTGGTCCTGCTGTAGTTGAAGAAA
GTCATGATCCCTTAACAGTATTGTCTATTAGTAACGATTTGAAAGGTATTGTTAGTCTCTTAAATCTTGG
AAATAAAACTAAAGTACCTAATCCATTAACCATTTCTACAACAGAGATGGAAAAATTTTATGAGAATATT
TTAAAAAATAATGATACCTATTTTAATGATGATATCAAACAATTCGTAAAATCTAATTCAAAAGTAATTA
CAGGTTTGACCGAAACACAAAAAAATGCATTAAATGATGAAATTAAAAAATTAAAAGATACTTTACAGTT
ATCATTTGATTTATATAATAAATATAAATTAAAATTAGATAGATTATTTAATAAGAAAAAAGAACTTGGC
CAAGACAAAATGCAAATTAAAAAACTTACTTTATTAAAAGAACAATTAGAATCAAAATTGAATTCACTTA
ATAACCCACATAATGTATTACAAAACTTTTCTGTTTTCTTTAACAAAAAAAAAGAAGCTGAAATAGCAGA
AACTGAAAACACATTAGAAAACACAAAAATATTATTGAAACATTATAAAGGACTTGTTAAATATTATAAT
GGTGAATCATCTCCATTAAAAACTTTAAGTGAAGTATCAATTCAAACAGAAGATAATTATGCCAATTTAG
AAAAATTTAGAGTATTAAGTAAAATAGATGGAAAACTCAATGATAATTTACATTTAGGAAAGAAAAAATT
ATCTTTCTTATCAAGTGGATTACATCATTTAATTACTGAATTAAAAGAAGTAATAAAAAATAAAAATTAT
ACAGGTAATTCTCCAAGTGAAAATAATAAGAAAGTTAACGAAGCTTTAAAATCTTACGAAAATTTTCTCC
CAGAAGCAAAAGTTACAACAGTTGTAACTCCACCTCAACCAGATGTAACTCCATCTCCATTATCTGTAAG
GGTAAGTGGTAGTTCAGGATCCACAAAAGAAGAAACACAAATACCAACTTCAGGCTCTTTATTAACAGAA
TTACAACAAGTAGTACAATCACAAAATTATGACGAAGAAGATGATTCCTTAGTTGTATTACCCATTTTTG
GAGAATCCGAAGATAATGACGAATATTTAGATCAAGTAGTAACTGGAGAAGCAATATCTGTCACAATGGA
TAATATCCTCTCAGGATTTGAAAATGAATATGATGTTATATATTTAAAACCTTTAGCTGGAGTATATAGA
AGCTTAAAAAAACAAATTGAAAAAAACATTATTACATTTAATTTAAATTTGAACGATATCTTAAATTCAC
GTCTTAAGAAACGAAAATATTTCTTAGATGTATTAGAATCTGATTTAATGCAATTTAAACATATATCCTC
AAATGAATACATTATTGAAGATTCATTTAAATTATTGAATTCAGAACAAAAAAACACACTTTTAAAAAGT
TACAAATATATAAAAGAATCAGTAGAAAATGATATTAAATTTGCACAGGAAGGTATAAGTTATTATGAAA
AGGTTTTAGCGAAATATAAGGATGATTTAGAATCAATTAAAAAAGTTATCAAAGAAGAAAAGGAGTTCCC
ATCATCACCACCAACAACACCTCCGTCACCAGCAAAAACAGACGAACAAAAGAAGGAAAGTAAGTTCCTT
CCATTTTTAACAAACATTGAGACCTTATACAATAACTTAGTTAATAAAATTGGCGATTACTTAATTAACT
TAAAGGCAAAGATTAACGATTGTAATGTTGAAAAAGATGAAGCACATGTTAAAATAACTAAACTTAGTGA
TTTAAAAGCAATTGATGACAAAATAGATCTTTTTAAAAACACTGACGACTTCGAAGCAATTAAAAAATTG
ATAAATGATGATACGAAAAAAGATATGCTTGGCAAATTACTTAGTACAGGATTAGTTCAAAATTTTCCTA
ATACAATAATATCAAAATTAATTGAAGGAAAATTCCAAGATATGTTAAACATTTCACAACACCAATGCGT
AAAAAAACAATGTCCACAAAATTCTGGATGTTTCAGACATTTAGATGAAAGAGAAGAATGTAAATGTTTA
TTAAATTACAAACAAGAAGGTGATAAATGTGTTGAAAATCCAAATCCTACTTGTAACGAAAATAATGGTG
GATGTGATGCAGATGCCAAATGTACCGAAGAAGATTCAGGTAGCAACGGAAAGAAAATCACATGTGAATG
TACTAAACCTGATTCTTATCCATTTTTCGATGGTATTTTCTGCAGTTCCTCTAACTTCTTAGGAATATCA
TTCTTATTAATACTCATGTTAATATTATACAGTTTCATTTAA

>AB276011.1 Plasmodium falciparum msp1 gene for merozoite surface protein-1, complete cds, isolate: T815
ATGAAGATCATATTCTTTTTATGTTCATTTCTTTTTTTTATTATAAATACACAATGTGTAACACATGAAA
GTTATCAAGAACTTGTCAAAAAACTAGAAGCTTTAGAAGATGCAGTATTGACAGGTTATAGTTTATTTCA
AAAGGAAAAAATGGTATTAAATGAAGGAACAAGTGGAACAGCTGTTACAACTAGTACACCTGGTTCAGGT
GGTTCAGTTACTTCAGGTGGTTCAGTTACTTCAGGTGGTTCAGTTACTTCAGTTGCTTCAGTTGCTTCAG
TTGCTTCAGTTGCTTCAGTTGCTTCAGGTGGTTCAGGTAATTCAAGACGTACAAATCCTTCAGATAATTC
AAGTGATTCAGATGCTAAATCTTACGCTGATTTAAAACATAGAGTTCAAAATTACTTGTTCACTATTAAA
GAACTCAAATATCCCGAACTCTTTGATTTAACCAATCATATGTTAACTTTGTGTGATAATATTCATGGTT
TCAAATATTTAATTGATGGATATGAAGAAATTAATGAATTATTATATAAATTAAACTTTTATTTTGATTT
ATTAAGAGCAAAATTAAATGATGTATGTGCTAATGATTATTGTCAAATACCTTTCAATCTTAAAATTCGT
GCAAATGAATTAGACGTACTTAAAAAACTTGTGTTCGGATATAGAAAACCATTAGACAATATTAAAGATA
ATGTAGGAAAAATGGAAGATTACATTAAAAAAAATAAAACAACCATAGCAAATATAAATGAATTAATTGA
AGGAAGTAAGAAAACAATTGATCAAAATAAGAATGCAGATAATGAAGAAGGAAAAAAAAAATTATACCAA
GCTCAATATAATCTTTTTATTTACAATAAACAATTACAAGAAGCACATAATTTAATAAGCGTTTTAGAAA
AACGTATTGACACTTTAAAAAAAAATGAAAACATAAAGAAATTACTTGATAAGATAAATGAAATTAAAAA
TCCCCCACCGGCCAATTCTGGAAATACACCAAATCCTCTCCCTGAGAATAAGAAAAAAGAAGTCGAGGGA
CACGAAGAAAAAATAAAAGAAATTGCCAAAACTATTAAATTTAACATTGATAGTTTATTTACTGATCCAC
TTGAATTAGAATATTATTTAAGAGAAAAAAATAAAAAAGTTGATGTAACACCTAAATCACAAGATCCTAC
GAAATCTGTTCAAATACCAAAAGTTCCTTATCCAAATGGTATTGTATATCCTTTACCACTCACTGATATT
CATAATTCATTAGCTGCAGATAATGATAAAAATTCATATGGTGATTTAATGAATCCTGATACTAAAGAAA
AAATTAATGAAAAAATTATTACAGATAATAAGGAAAGAAAAATATTCATTAATAACATTAAAAAACAAAT
TGATTTAGAAGAAAAAAACATTAATCACACAAAAGAACAAAATAAAAAATTACTTGAAGATTATGAAAAG
TCAAAAAAGGATTATGAAGAATTACTTGAAAAATTTTATGAAATGAAATTTAATAATAATTTTGACAAAG
ATGTCGTAGATAAAATATTCAGTGCAAGATATACATATAATGTTGAAAAACAAAAATATAATAATAAATT
TTCATCCTCTAATAATTCTGTATATAATGTTCAAAAATTAAAAAAGGCTCTTTCATATCTTGAAGATTAT
TCTTTAAGAAAAGGAATTTCTGAAAAAGATTTTAATCATTATTATACTTTGAAAACTGGCCTCGAAGCTG
ATATAAAAAAATTAACAGAAGAAATAAAGAGTAGTGAAAACAAAATTCTAGAAAAAAATTTTAAAGGACT
AACACATTCAGCAAATGCTTCCTTAGAAGTATCTGATATTGTAAAATTACAAGTACAAAAAGTTTTATTA
ATTAAAAAAATAGAAGACTTAAGAAAGATAGAATTATTTTTAAAAAATGCACAACTAAAAGATAGTATTC
ATGTACCAAATATTTATAAACCACAAAATAAACCAGAACCATATTATTTAATTGTATTAAAAAAAGAAGT
AGATAAATTAAAAGAATTTATACCAAAAGTAAAAGACATGTTAAAGAAAGAACAAGCTGTCTTATCAAGT
ATTACACAACCTTTAGTTGCAGCAAGCGAAACAACTGAAGATGGGGGTCACTCCACACACACATTATCCC
AATCAGGAGAAACAGAAGTAACAGAAGAAACAGTAGGACACACAACAACGGTAACAATAACATTACCACC
AACACAACCATCACCACCAAAAGAAGTAAAAGTTGTTGAAAATTCAATAGAACATAAGAGTAATGACAAT
TCACAAGCCTTGACAAAAACAGTTTATCTAAAGAAATTAGATGAATTTTTAACTAAATCATATATATGTC
ATAAATATATTTTAGTATCAAACTCTAGTATGGACCAAAAATTATTAGAGGTATATAATCTTACTCCAGA
AGAAGAAAATGAATTAAAATCATGTGATCCATTAGATTTATTATTTAATATTCAAAATAACATACCTGCT
ATGTATTCATTATATGATAGTATGAACAATGATTTACAACATCTCTTTTTTGAATTATATCAAAAGGAAA
TGATTTATTATTTACATAAACTAAAAGAGGAAAATCACATCAAAAAATTATTAGAGGAGCAAAAACAAAT
AACTGGAACATCATCTACATCCAGTCCTGGAAATACAACCGTAAATACTGCTCAATCCGCAACTCACAGT
AATTCCCAAAACCAACAATCAAATGCATCCTCTACCAATACCCAAAATGGTGTAGCTGTATCATCTGGTC
CTGCTGTAGTTGAAGAAAGTCATGATCCCTTAACAGTATTGTCTATTAGTAACGATTTGAAAGGTATTGT
TAGTCTCTTAAATCTTGGAAATAAAACTAAAGTACCTAATCCATTAACCATTTCTACAACAGAGATGGAA
AAATTTTATGAGAATATTTTAAAAAATAATGATACCTATTTTAATGATGATATCAAACAATTCGTAAAAT
CTAATTCAAAAGTAATTACAGGTTTGACCGAAACACAAAAAAATGCATTAAATGATGAAATTAAAAAATT
AAAAGATACTTTACAGTTATCATTTGATTTATATAATAAATATAAATTAAAATTAGATAGATTATTTAAT
AAGAAAAAAGAACTTGGCCAAGACAAAATGCAAATTAAAAAACTTACTTTATTAAAAGAACAATTAGAAT
CAAAATTGAATTCACTTAATAACCCACATAATGTATTACAAAACTTTTCTGTTTTCTTTAACAAAAAAAA
AGAAGCTGAAATAGCAGAAACTGAAAACACATTAGAAAACACAAAAATATTATTGAAACATTATAAAGGA
CTTGTTAAATATTATAATGGTGAATCATCTCCATTAAAAACTTTAAGTGAAGTATCAATTCAAACAGAAG
ATAATTATGCCAATTTAGAAAAATTTAGAGTATTAAGTAAAATAGATGGAAAACTCAATGATAATTTACA
TTTAGGAAAGAAAAAATTATCTTTCTTATCAAGTGGATTACATCATTTAATTACTGAATTAAAAGAAGTA
ATAAAAAATAAAAATTATACAGGTAATTCTCCAAGTGAAAATAATAAGAAAGTTAACGAAGCTTTAAAAT
CTTACGAAAATTTTCTCCCAGAAGCAAAAGTTACAACAGTTGTAACTCCACCTCAACCAGATGTAACTCC
ATCTCCATTATCTGTAAGGGTAAGTGGTAGTTCAGGATCCACAAAAGAAGAAACACAAATACCAACTTCA
GGCTCTTTATTAACAGAATTACAACAAGTAGTACAATTACAAAATTATGACGAAGAAGATGATTCCTTAG
TTGTATTACCCATTTTTGGAGAATCCGAAGATAATGACGAATATTTAGATCAAGTAGTAACTGGAGAAGC
AATATCTGTCACAATGGATAATATCCTCTCAGGATTTGAAAATGAATATGATGTTATATATTTAAAACCT
TTAGCTGGAGTATATAGAAGCTTAAAAAAACAAATTGAAAAAAACATTATTACATTTAATTTAAATTTGA
ACGATATCTTAAATTCACGTCTTAAGAAACGAAAATATTTCTTAGATGTATTAGAATCTGATTTAATGCA
ATTTAAACATATATCCTCAAATGAATACATTATTGAAGATTCATTTAAATTATTGAATTCAGAACAAAAA
AACACACTTTTAAAAAGTTACAAATATATAAAAGAATCAGTAGAAAATGATATTAAATTTGCACAGGAAG
GTATAAGTTATTATGAAAAGGTTTTAGCGAAATATAAGGATGATTTAGAATCAATTAAAAAAGTTATCAA
AGAAGAAAAGGAGTTCCCATCATCACCACCAACAACACCTCCGTCACCAGCAAAAACAGACGAACAAAAG
AAGGAAAGTAAGTTCCTTCCATTTTTAACAAACATTGAGACCTTATACAATAACTTAGTTAATAAAATTG
ACGATTACTTAATTAACTTAAAGGCAAAGATTAACGATTGTAATGTTGAAAAAGATGAAGCACATGTTAA
AATAACTAAACTTAGTGATTTAAAAGCAATTGATGACAAAATAGATCTTTTTAAAAACACTAACGACTTC
GAAGCAATTAAAAAATTGATAAATGATGATACGAAAAAAGATATGCTTGGCAAATTACTTAGTACAGGAT
TAGTTCAAAATTTTCCTAATACAATAATATCAAAATTAATTGAAGGAAAATTCCAAGATATGTTAAACAT
TTCACAACACCAATGCGTAAAAAAACAATGTCCAGAAAATTCTGGATGTTTCAGACATTTAGATGAAAGA
GAAGAATGTAAATGTTTATTAAATTACAAACAAGAAGGTGATAAATGTGTTGAAAATCCAAATCCTACTT
GTAACGAAAATAATGGTGGATGTGATGCAGATGCCAAATGTACCGAAGAAGATTCAGGTAGCAACGGAAA
GAAAATCACATGTGAATGTACTAAACCTGATTCTTATCCACTTTTCGATGGTATTTTCTGCAGTTCCTCT
AACTTCTTAGGAATATCATTCTTATTAATACTCATGTTAATATTATACAGTTTCATTTAA

>AB276012.1 Plasmodium falciparum msp1 gene for merozoite surface protein-1, complete cds, isolate: T828
ATGAAGATCATATTCTTTTTATGTTCATTTCTTTTTTTTATTATAAATACACAATGTGTAACACATGAAA
GTTATCAAGAACTTGTCAAAAAACTAGAAGCTTTAGAAGATGCAGTATTGACAGGTTATAGTTTATTTCA
AAAGGAAAAAATGGTATTAAATGAAGGAACAAGTGGAACAGCTGTTACAACTAGTACACCTGGTTCAAAG
GGTTCAGTTGCTTCAGGTGGTTCAGGTGGCTCAGTTGCTTCAGGTGGCTCAGTTGCTTCAGGTGGCTCAG
TTGCTTCAGGTGGCTCAGTTGCTTCAGGTGGTTCAGGTAATTCAAGACGTACAAATCCTTCAGATAATTC
AAGTGATTCAGATGCTAAATCTTACGCTGATTTAAAACACAGAGTACGAAATTACTTGTTAACTATCAAA
GAACTCAAATATCCTCAACTCTTTGATTTAACTAATCATATGTTAACTTTGTGTGATAATATTCATGGTT
TCAAATATTTAATTGATGGATATGAAGAAATTAATGAATTATTATATAAATTAAACTTTTATTTTGATTT
ATTAAGAGCAAAATTAAATGATGTATGTGCTAATGATTATTGTCAAATACCTTTCAATCTTAAAATTCGT
GCAAATGAATTAGACGTACTTAAAAAACTTGTGTTCGGATATAGAAAACCATTAGACAATATTAAAGATA
ATGTAGGAAAAATGGAAGATTACATTAAAAAAAATAAAAAAACCATAGAAAATATAAATGAATTAATTGA
AGAAAGTAAGAAAACAATTGATAAAAATAAGAATGCAACTAAAGAAGAAGAAAAAAAAAAATTATACCAA
GCTCAATATGATCTTTCTATTTACAATAAACAATTAGAAGAAGCACATAATTTAATAAGCGTTTTAGAAA
AACGTATTGACACTTTAAAAAAAAATGAAAACATTAAGGAATTACTTGATAAGATAAATGAAATTAAAAA
TCCCCCACCGGCCAATTCTGGAAATACACCAAATACTCTCCTTGATAAGAACAAAAAAATCGAGGAACAC
GAAAAAGAAATAAAAGAAATTGCCAAAACTATTAAATTTAATATTGATAGTTTATTTACTGATCCACTTG
AATTAGAATACTATTTAAGAGAAAAAAATAAAAATATTGATATAAGTGCAAAGGTTGAAACAAAGGAATC
AACTGAACCCAATGAATATCCAAATGGAGTTACTTATCCTTTGTCATATAACGATATTAACAATGCTTTA
AATGAACTTAATTCTTTTGGTGATTTAATTAATCCATTTGATTATACAAAAGAACCAAGTAAAAACATAT
ATACTGATAATGAAAGAAAAAAATTCATAAATGAAATTAAGGAAAAAATTAAAATAGAAAAAAAAAAAAT
TGAATCTGATAAAAAATCTTACGAAGACAGATCTAAGTCTTTAAATGATATAACAAAAGAATATGAAAAA
TTACTTAATGAAATTTATGATAGCAAATTCAATAATAATATAGATTTAACTAATTTCGAAAAAATGATGG
GTAAAAGATATTCATATAAAGTTGAGAAACTTACACACCATAATACTTTTGCATCCTATGAAAATTCTAA
ACATAATCTTGAAAAGTTAACAAAAGCTCTTAAATATATGGAAGATTATTCTTTAAGGAATATAGTAGTT
GAAAAAGAATTAAAATATTATAAAAATTTAATAAGCAAAATAGAAAATGAGATTGAAACATTAGTTGAAA
ATATTAAAAAAGATGAAGAACAGCTTTTTGAAAAAAAAATTACTAAAGACGAAAATAAACCAGATGAAAA
AATTTTAGAAGTATCTGACATTGTAAAAGTACAAGTTCAAAAAGTTTTATTAATGAACAAAATTGACGAA
TTAAAAAAGACTCAATTGATTTTAAAAAATGTAGAATTAAAACATAATATACATGTTCCCAATTCTTACA
AACAAGAAAATAAGCAAGAACCTTATTATTTAATTGTGTTGAAAAAAGAAATTGATAAATTAAAAGTGTT
CATGCCTAAGGTAGAATCATTGATAAATGAAGAAAAAAAAAACATAAAAACAGAAGGTCAATCGGATAAT
TCGGAACCATCAACCGAAGGAGAAATAACAGGACAAGCAACTACAAAACCTGGACAACAAGCAGGATCTG
CTTTAGAAGGAGATTCAGTACAAGCACAAGCACAAGAACAAAAACAAGCACAACCACCAGTACCAGTACC
AGTACCAGAAGCAAAAGCACAAGTCCCAACACCACCAGCACCAGTAAATAATAAAACTGAAAATGTTTCC
AAATTAGATTATCTTGAAAAATTATATGAATTTTTAAATACTTCATATATATGTCACAAATATATTTTGG
TTTCACACTCAACTATGAACGAAAAGATATTAAAACAATATAAAATTACAAAGGAGGAAGAAAGCAAATT
AAGTTCATGTGATCCATTAGACTTATTGTTTAATATACAAAATAACATACCTGTAATGTATTCTATGTTT
GATAGCTTAAACAATAGTTTATCACAACTATTTATGGAAATTTATGAAAAAGAAATGGTTTGTAATTTAT
ATAAACTTAAGGATAATGACAAAATTAAAAATTTATTAGAGGAAGCGAAAAAAGTATCCACATCTGTAAA
AACTCTTTCAAGTTCATCAATGCAACCATTATCATTAACACCTCAGGATAAACCCGAAGTAAGTGCAAAT
GATGATACATCACATTCTACAAATTTGAATAATAGTTTAAAATTATTTGAAAACATATTGAGTCTTGGAA
AAAACAAAAATATATACCAAGAATTAATAGGTCAAAAAAGTAGTGAAAACTTTTATGAAAAGATATTAAA
AGATAGTGATACATTTTATAATGAATCTTTTACAAATTTTGTAAAATCTAAAGCTGATGATATTAATTCA
TTGAATGATGAATCAAAAAGGAAGAAATTAGAAGAAGATATTAATAAATTAAAAAAAACTTTACAGTTAT
CATTTGATTTATATAATAAATATAAATTAAAATTAGAAAGATTATTTGATAAAAAGAAAACAGTTGGTAA
ATATAAAATGCAAATTAAAAAACTTACTTTATTAAAAGAACAATTAGAATCAAAATTGAATTCACTTAAT
AACCCAAAGCATGTATTACAAAACTTTTCTGTTTTCTTTAACAAAAAAAAAGAAGCTGAAATAGCAGAAA
CTGAAAACACATTAGAAAACACAAAAATATTATTGAAACATTATAAAGGACTTGTTAAATATTATAATGG
TGAATCATCTCCATTAAAAACTTTAAGTGAAGAATCAATTCAAACAGAAGATAATTATGCCAGTTTAGAA
AACTTTAAAGTATTAAGTAAATTAGAAGGAAAATTAAAGGATAATTTAAATTTAGAAAAGAAAAAATTAT
CATACTTATCAAGTGGATTACATCATTTAATTGCTGAATTAAAAGAAGTAATAAAAAATAAAAATTATAC
AGGTAATTCTCCAAGTGAAAATAATACGGATGTTAACAATGCATTAGAATCTTACAAAAAATTTCTCCCA
GAAGGAACAGATGTTGCAACAGTTGTAAGTGAAAGTGGATCCGACACATTAGAACAAAGTCAACCAAAGA
AACCAGCATCAACTCATGTAGGAGCAGAGTCTAACACAATAACAACATCACAAAATGTCGATGATGAAGT
AGATGACGTAATCATAGTACCTATATTTGGAGAATCCGAAGAAGATTATGATGATTTAGGACAAGTAGTA
ACAGGAGAAGCAGTAACTCCTTCCGTAATTGATAACATACTTTCTAAAATTGAAAATGAATATGAGGTTT
TATATTTAAAACCTTTAGCAGGTGTTTATAGAAGTTTAAAAAAACAATTAGAAAATAACGTTATGACATT
TAATGTTAATGTTAAGGATATTTTAAATTCACGATTTAATAAACGTGAAAATTTCAAAAATGTTTTAGAA
TCAGATTTAATTCCATATAAAGATTTAACATCAAGTAATTATGTTGTCAAAGATCCATATAAATTTCTTA
ATAAAGAAAAAAGAGATAAATTCTTAAGCAGTTATAATTATATTAAGGATTCAATAGATACGGATATAAA
TTTTGCAAATGATGTTCTTGGATATTATAAAATATTATCCGAAAAATATAAATCAGATTTAGATTCAATT
AAAAAATATATCAACGACAAACAAGGTGAAAATGAGAAATACCTTCCCTTTTTAAACAATATTGAGACCT
TATATAAAACAGTTAATGATAAAATTGATTTATTTGTAATTCATTTAGAAGCAAAAGTTCTAAATTATAC
ATATGAGAAATCAAACGTAGAAGTTAAAATAAAAGAACTTAATTACTTAAAAACAATTCAAGACAAATTG
GCAGATTTTAAAAAAAATAACAATTTCGTTGGAATTGCTGATTTATCAACAGATTATAACCATAATAACT
TATTGACAAAGTTCCTTAGTACAGGTATGGTTTTTGAAAATCTTGCTAAAACCGTTTTATCTAATTTACT
TGATGGAAACTTGCAAGGTATGTTAAACATTTCACAACACCAATGCGTAAAAAAACAATGTCCACAAAAT
TCTGGATGTTTCAGACATTTAGATGAAAGAGAAGAATGTAAATGTTTATTAAATTACAAACAAGAAGGTG
ATAAATGTGTTGAAAATCCAAATCCTACTTGTAACGAAAATAATGGTGGATGTGATGCAGATGCCAAATG
TACCGAAGAAGATTCAGGTAGCAACGGAAAGAAAATCACATGTGAATGTACTAAACCTGATTCTTATCCA
CTTTTCGATGGTATTTTCTGCAGTTCCTCTAACTTCTTAGGAATATCATTCTTATTAATACTCATGTTAA
TATTATACAGTTTCATTTAA

>AB276013.1 Plasmodium falciparum msp1 gene for merozoite surface protein-1, complete cds, isolate: T836
ATGAAGATCATATTCTTTTTATGTTCATTTCTTTTTTTTATTATAAATACACAATGTGTAACACATGAAA
GTTATCAAGAACTTGTCAAAAAACTAGAAGCTTTAGAAGATGCAGTATTGACAGGTTATAGTTTATTTCA
AAAGGAAAAAATGGTATTAAATGAAGGAACAAGTGGAACAGCTGTTACAACTAGTACACCTGGTTCAGGT
GGTTCAGTTACTTCAGGTGGTTCAGTTACTTCAGGTGGTTCAGTTACTTCAGTTGCTTCAGTTGCTTCAG
TTGCTTCAGTTGCTTCAGTTGCTTCAGGTGGTTCAGGTAATTCAAGACGTACAAATCCTTCAGATAATTC
AAGTGATTCAGATGCTAAATCTTACGCTGATTTAAAACATAGAGTTCAAAATTACTTGTTCACTATTAAA
GAACTCAAATATCCCGAACTCTTTGATTTAACCAATCATATGTTAACTTTGTGTGATAATATTCATGGTT
TCAAATATTTAATTGATGGATATGAAGAAATTAATGAATTATTATATAAATTAAACTTTTATTTTGATTT
ATTAAGAGCAAAATTAAATGATGTATGTGCTAATGATTATTGTCAAATACCTTTCAATCTTAAAATTCGT
GCAAATGAATTAGACGTACTTAAAAAACTTGTGTTCGGATATAGAAAACCATTAGACAATATTAAAGATA
ATGTAGGAAAAATGGAAGATTACATTAAAAAAAATAAAACAACCATAGCAAATATAAATGAATTAATTGA
AGGAAGTAAGAAAACAATTGATCAAAATAAGAATGCAGATAATGAAGAAGGAAAAAAAAAATTATACCAA
GCTCAATATAATCTTTTTATTTACAATAAACAATTACAAGAAGCACATAATTTAATAAGCGTTTTAAAAA
AACGTATTGACACTTTAAAAAAAAATGAAAACATAAAGAAATTACTTGAAGATATAGATAAAATTAAAAC
AGATGCCGAAAAACCCACTACTGGAAGTAAACCAAATACTCTCCTTGATAAGAACAAAAAAATCGAGGAA
CACGAAGAAAAAATAAAAGAAATTGCCAAAACTATTAAATTTAACATTGATAGTTTATTTACTGATCCAC
TTGAATTAGAATATTATTTAAGAGAAAAAAATAAAAAAGTTGATGTAACACCTAAATCACAAGATCCTAC
GAAATCTGTTCAAATACCAAAAGTTCCTTATCCAAATGGTATTGTATATCCTTTACCACTCACTGATATT
CATAATTCATTAGCTGCAGATAATGATAAAAATTCATATGGTGATTTAATGAATCCTGATACTAAAGAAA
AAATTAATGAAAAAATTATTACAGATAATAAGGAAAGAAAAATATTCATTAATAACATTAAAAAACAAAT
TGATTTAGAAGAAAAAAACATTAATCACACAAAAGAACAAAATAAAAAATTACTTGAAGATTATGAAAAG
TCAAAAAAGGATTATGAAGAATTACTTGAAAAATTTTATGAAATGAAATTTAATAATAATTTTGACAAAG
ATGTCGTAGATAAAATATTCAGTGCAAGATATACATATAATGTTGAAAAACAAAAATATAATAATAAATT
TTCATCCTCTAATAATTCTGTATATAATGTTCAAAAATTAAAAAAGGCTCTTTCATATCTTGAAGATTAT
TCTTTAAGAAAAGGAATTTCTGAAAAAGATTTTAATCATTATTATACTTTGAAAACTGGCCTCGAAGCTG
ATATAAAAAAATTAACAGAAGAAATAAAGAGTAGTGAAAACAAAATTTTAGAAAAAAATTTTAAAGGACT
AACACATTCAGCAAATGCTTCCTTAGAAGTATCTGATATTGTAAAATTACAAGTACAAAAAGTTTTATTA
ATTAAAAAAATAGAAGACTTAAGAAAGATAGAATTATTTTTAAAAAATGCACAACTAAAAGATAGTATTC
ATGTACCAAATATTTATAAACCACAAAATAAACCAGAACCATATTATTTAATTGTATTAAAAAAAGAAGT
AGATAAATTAAAAGAATTTATACCAAAAGTAAAAGACATGTTAAAGAAAGAACAAGCTGTCTTATCAAGT
ATTACACAACCTTTAGTTGCAGCAAGCGAAACAACTGAAGATGGGGGTCACTCCACACACACATTATCCC
AATCAGGAGAAACAGAAGTAACAGAAGAAACAGTAGGACACACAACAACGGTAACAATAACATTACCACC
AAAAGAAGTAAAAGTTGTTGAAAATTCAATAGAACATAAGAGTAATGACAATTCACAAGCCTTGACAAAA
ACAGTTTATCTAAAGAAATTAGATGAATTTTTAACTAAATCATATATATGTCATAAATATATTTTAGTAT
CAAACTCTAGTATGGACCAAAAATTATTAGAGGTATATAATCTTACTCCAGAAGAAAAAAATGAATTAAA
ATCATGTGATCCATTAGATTTATTATTTAATATTCAAAATAACATACCTGCTATGTATTCATTATATGAT
AGTATGAACAATGATTTACAACATCTCTTTTTTGAATTATATCAAAAGGAAATGATTTATTATTTACATA
AACTAAAAGAGGAAAATCACATCAAAAAATTATTAGAGGAGCAAAAACAAATAACTGGAACATCATCTAC
ATCCAGTCCTGGAAATACAACCGTAAATACTGCTCAATCCGCAACTCACAGTAATTCCCAAAACCAACAA
TCAAATGCATCCTCTACCAATACCCAAAATGGTGTAGCTGTATCATCTGGTCCTGCTGTAGTTGAAGAAA
GTCATGATCCCTTAACAGTATTGTCTATTAGTAACGATTTGAAAGGTATTGTTAGTCTCTTAAATCTTGG
AAATAAAACTAAAGTACCTAATCCATTAACCATTTCTACAACAGAGATGGAAAAATTTTATGAGAATATT
TTAAAAAATAATGATACCTATTTTAATGATGATATCAAACAATTCGTAAAATCTAATTCAAAAGTAATTA
CAGGTTTGACCGAAACACAAAAAAATGCATTAAATGATGAAATTAAAAAATTAAAAGATACTTTACAGTT
ATCATTTGATTTATATAATAAATATAAATTAAAATTAGATAGATTATTTAATAAGAAAAAAGAACTTGGC
CAAGACAAAATGCAAATTAAAAAACTTACTTTATTAAAAGAACAATTAGAATCAAAATTGAATTCACTTA
ATAACCCACATAATGTATTACAAAACTTTTCTGTTTTCTTTAACAAAAAAAAAGAAGCTGAAATAGCAGA
AACTGAAAACACATTAGAAAACACAAAAATATTATTGAAACATTATAAAGGACTTGTTAAATATTATAAT
GGTGAATCATCTCCATTAAAAACTTTAAGTGAAGTATCAATTCAAACAGAAGATAATTATGCCAATTTAG
AAAAATTTAGAGTATTAAGTAAAATAGATGGAAAACTCAATGATAATTTACATTTAGGAAAGAAAAAATT
ATCTTTCTTATCAAGTGGATTACATCATTTAATTACTGAATTAAAAGAAGTAATAAAAAATAAAAATTAT
ACAGGTAATTCTCCAAGTGAAAATAATAAGAAAGTTAACGAAGCTTTAAAATCTTACGAAAATTTTCTCC
CAGAAGCAAAAGTTACAACAGTTGTAACTCCACCTCAACCAGATGTAACTCCATCTCCATTATCTGTAAG
GGTAAGTGGTAGTTCAGGATCCACAAAAGAAGAAACACAAATACCAACTTCAGGCTCTTTATTAACAGAA
TTACAACAAGTAGTACAATCACAAAATTATGACGAAGAAGATGATTCCTTAGTTGTATTACCCATTTTTG
GAGAATCCGAAGATAATGACGAATATTTAGATCAAGTAGTAACTGGAGAAGCAATATCTGTCACAATGGA
TAATATCCTCTCAGGATTTGAAAATGAATATGATGTTATATATTTAAAACCTTTAGCTGGAGTATATAGA
AGCTTAAAAAAACAAATTGAAAAAAACATTATTACATTTAATTTAAATTTGAACGATATCTTAAATTCAC
GTCTTAAGAAACGAAAATATTTCTTAGATGTATTAGAATCTGATTTAATGCAATTTAAACATATATCCTC
AAATGAATACATTATTGAAGATTCATTTAAATTATTGAATTCAGAACAAAAAAACACACTTTTAAAAAGT
TACAAATATATAAAAGAATCAGTAGAAAATGATATTAAATTTGCACAGGAAGGTATAAGTTATTATGAAA
AGGTTTTAGCGAAATATAAGGATGATTTAGAATCAATTAAAAAAGTTATCAAAGAAGAAAAGGAGTTCCC
ATCATCACCACCAACAACACCTCCGTCACCAGCAAAAACAGACGAACAAAAGAAGGAAAGTAAGTTCCTT
CCATTTTTAACAAACATTGAGACCTTATACAATAACTTAGTTAATAAAATTGGCGATTACTTAATTAACT
TAAAGGCAAAGATTAACGATTGTAATGTTGAAAAAGATGAAGCACATGTTAAAATAACTAAACTTAGTGA
TTTAAAAGCAATTGATGACAAAATAGATCTTTTTAAAAACACTGACGACTTCGAAGCAATTAAAAAATTG
ATAAATGATGATACGAAAAAAGATATGCTTGGCAAATTACTTAGTACAGGATTAGTTCAAAATTTTCCTA
ATACAATAATATCAAAATTAATTGAAGGAAAATTCCAAGATATGTTAAACATTTCACAACACCAATGCGT
AAAAAAACAATGTCCACAAAATTCTGGATGTTTCAGACATTTAGATGAAAGAGAAGAATGTAAATGTTTA
TTAAATTACAAACAAGAAGGTGATAAATGTGTTGAAAATCCAAATCCTACTTGTAACGAAAATAATGGTG
GATGTGATGCAGATGCCAAATGTACCGAAGAAGATTCAGGTAGCAACGGAAAGAAAATCACATGTGAATG
TACTAAACCTGATTCTTATCCATTTTTCGATGGTATTTTCTGCAGTTCCTCTAACTTCTTAGGAATATCA
TTCTTATTAATACTCATGTTAATATTATACAGTTTCATTTAA

>AB276014.1 Plasmodium falciparum msp1 gene for merozoite surface protein-1, complete cds, isolate: T837
ATGAAGATCATATTCTTTTTATGTTCATTTCTTTTTTTTATTATAAATACACAATGTGTAACACATGAAA
GTTATCAAGAACTTGTCAAAAAACTAGAAGCTTTAGAAGATGCAGTATTGACAGGTTATAGTTTATTTCA
AAAGGAAAAAATGGTATTAAATGAAGGAACAAGTGGAACAGCTGTTACAACTAGTACACCTGGTTCAAAG
GGTTCAGTTGCTTCAGGTGGTTCAGGTGGCTCAGTTGCTTCAGGTGGCTCAGTTGCTTCAGGTGGCTCAG
TTGCTTCAGGTGGCTCAGTTGCTTCAGGTGGTTCAGGTAATTCAAGACGTACAAATCCTTCAGATAATTC
AAGTGATTCAGATGCTAAATCTTACGCTGATTTAAAACACAGAGTACGAAATTACTTGTTAACTATCAAA
GAACTCAAATATCCTCAACTCTTTGATTTAACTAATCATATGTTAACTTTGTGTGATAATATTCATGGTT
TCAAATATTTAATTGATGGATATGAAGAAATTAATGAATTATTATATAAATTAAACTTTTATTTTGATTT
ATTAAGAGCAAAATTAAATGATGTATGTGCTAATGATTATTGTCAAATACCTTTCAATCTTAAAATTCGT
GCAAATGAATTAGACGTACTTAAAAAACTTGTGTTCGGATATAGAAAACCATTAGACAATATTAAAGATA
ATGTAGGAAAAATGGAAGATTACATTAAAAAAAATAAAAAAACCATAGAAAATATAAATGAATTAATTGA
AGAAAGTAAGAAAACAATTGATAAAAATAAGAATGCAACTAAAGAAGAAGAAAAAAAAAAATTATACCAA
GCTCAATATGATCTTTCTATTTACAATAAACAATTAGAAGAAGCACATAATTTAATAAGCGTTTTAGAAA
AACGTATTGACACTTTAAAAAAAAATGAAAACATTAAGGAATTACTTGATAAGATAAATGAAATTAAAAA
TCCCCCACCGGCCAATTCTGGAAATACACCAAATACTCTCCTTGATAAGAACAAAAAAATCGAGGAACAC
GAAAAAGAAATAAAAGAAATTGCCAAAACTATTAAATTTAATATTGATAGTTTATTTACTGATCCACTTG
AATTAGAATACTATTTAAGAGAAAAAAATAAAAATATTGATATAAGTGCAAAGGTTGAAACAAAGGAATC
AACTGAACCCAATGAATATCCAAATGGAGTTACTTATCCTTTGTCATATAACGATATTAACAATGCTTTA
AATGAACTTAATTCTTTTGGTGATTTAATTAATCCATTTGATTATACAAAAGAACCAAGTAAAAACATAT
ATACTGATAATGAAAGAAAAAAATTCATAAATGAAATTAAGGAAAAAATTAAAATAGAAAAAAAAAAAAT
TGAATCTGATAAAAAATCTTACGAAGACAGATCTAAGTCTTTAAATGATATAACAAAAGAATATGAAAAA
TTACTTAATGAAATTTATGATAGCAAATTCAATAATAATATAGATTTAACTAATTTCGAAAAAATGATGG
GTAAAAGATATTCATATAAAGTTGAGAAACTTACACACCATAATACTTTTGCATCCTATGAAAATTCTAA
ACATAATCTTGAAAAGTTAACAAAAGCTCTTAAATATATGGAAGATTATTCTTTAAGGAATATAGTAGTT
GAAAAAGAATTAAAATATTATAAAAATTTAATAAGCAAAATAGAAAATGAGATTGAAACATTAGTTGAAA
ATATTAAAAAAGATGAAGAACAGCTTTTTGAAAAAAAAATTACTAAAGACGAAAATAAACCAGATGAAAA
AATTTTAGAAGTATCTGACATTGTAAAAGTACAAGTTCAAAAAGTTTTATTAATGAACAAAATTGACGAA
TTAAAAAAGACTCAATTGATTTTAAAAAATGTAGAATTAAAACATAATATACATGTTCCCAATTCTTACA
AACAAGAAAATAAGCAAGAACCTTATTATTTAATTGTGTTGAAAAAAGAAATTGATAAATTAAAAGTGTT
CATGCCTAAGGTAGAATCATTGATAAATGAAGAAAAAAAAAACATAAAAACAGAAGGTCAATCGGATAAT
TCGGAACCATCAACCGAAGGAGAAATAACAGGACAAGCAACTACAAAACCTGGACAACAAGCAGGATCTG
CTTTAGAAGGAGATTCAGTACAAGCACAAGCACAAGAACAAAAACAAGCACAACCACCAGTACCAGTACC
AGTACCAGAAGCAAAAGCACAAGTCCCAACACCACCAGCACCAGTAAATAATAAAACTGAAAATGTTTCC
AAATTAGATTATCTTGAAAAATTATATGAATTTTTAAATACTTCATATATATGTCACAAATATATTTTGG
TTTCACACTCAACTATGAACGAAAAGATATTAAAACAATATAAAATTACAAAGGAGGAAGAAAGCAAATT
AAGTTCATGTGATCCATTAGACTTATTGTTTAATATACAAAATAACATACCTGTAATGTATTCTATGTTT
GATAGCTTAAACAATAGTTTATCACAACTATTTATGGAAATTTATGAAAAAGAAATGGTTTGTAATTTAT
ATAAACTTAAGGATAATGACAAAATTAAAAATTTATTAGAGGAAGCGAAAAAAGTATCCACATCTGTAAA
AACTCTTTCAAGTTCATCAATGCAACCATTATCATTAACACCTCAGGATAAACCCGAAGTAAGTGCAAAT
GATGATACATCACATTCTACAAATTTGAATAATAGTTTAAAATTATTTGAAAACATATTGAGTCTTGGAA
AAAACAAAAATATATACCAAGAATTAATAGGTCAAAAAAGTAGTGAAAACTTTTATGAAAAGATATTAAA
AGATAGTGATACATTTTATAATGAATCTTTTACAAATTTTGTAAAATCTAAAGCTGATGATATTAATTCA
TTGAATGATGAATCAAAAAGGAAGAAATTAGAAGAAGATATTAATAAATTAAAAAAAACTTTACAGTTAT
CATTTGATTTATATAATAAATATAAATTAAAATTAGAAAGATTATTTGATAAAAAGAAAACAGTTGGTAA
ATATAAAATGCAAATTAAAAAACTTACTTTATTAAAAGAACAATTAGAATCAAAATTGAATTCACTTAAT
AACCCAAAGCATGTATTACAAAACTTTTCTGTTTTCTTTAACAAAAAAAAAGAAGCTGAAATAGCAGAAA
CTGAAAACACATTAGAAAACACAAAAATATTATTGAAACATTATAAAGGACTTGTTAAATATTATAATGG
TGAATCATCTCCATTAAAAACTTTAAGTGAAGAATCAATTCAAACAGAAGATAATTATGCCAGTTTAGAA
AACTTTAAAGTATTAAGTAAATTAGAAGGAAAATTAAAGGATAATTTAAATTTAGAAAAGAAAAAATTAT
CATACTTATCAAGTGGATTACATCATTTAATTGCTGAATTAAAAGAAGTAATAAAAAATAAAAATTATAC
AGGTAATTCTCCAAGTGAAAATAATACGGATGTTAACAATGCATTAGAATCTTACAAAAAATTTCTCCCA
GAAGGAACAGATGTTGCAACAGTTGTAAGTGAAAGTGGATCCGACACATTAGAACAAAGTCAACCAAAGA
AACCAGCATCAACTCATGTAGGAGCAGAGTCTAACACAATAACAACATCACAAAATGTCGATGATGAAGT
AGATGACGTAATCATAGTACCTATATTTGGAGAATCCGAAGAAGATTATGATGATTTAGGACAAGTAGTA
ACAGGAGAAGCAGTAACTCCTTCCGTAATTGATAACATACTTTCTAAAATTGAAAATGAATATGAGGTTT
TATATTTAAAACCTTTAGCAGGTGTTTATAGAAGTTTAAAAAAACAATTAGAAAATAACGTTATGACATT
TAATGTTAATGTTAAGGATATTTTAAATTCACGATTTAATAAACGTGAAAATTTCAAAAATGTTTTAGAA
TCAGATTTAATTCCATATAAAGATTTAACATCAAGTAATTATGTTGTCAAAGATCCATATAAATTTCTTA
ATAAAGAAAAAAGAGATAAATTCTTAAGCAGTTATAATTATATTAAGGATTCAATAGATACGGATATAAA
TTTTGCAAATGATGTTCTTGGATATTATAAAATATTATCCGAAAAATATAAATCAGATTTAGATTCAATT
AAAAAATATATCAACGACAAACAAGGTGAAAATGAGAAATACCTTCCCTTTTTAAACAATATTGAGACCT
TATATAAAACAGTTAATGATAAAATTGATTTATTTGTAATTCATTTAGAAGCAAAAGTTCTAAATTATAC
ATATGAGAAATCAAACGTAGAAGTTAAAATAAAAGAACTTAATTACTTAAAAACAATTCAAGACAAATTG
GCAGATTTTAAAAAAAATAACAATTTCGTTGGAATTGCTGATTTATCAACAGATTATAACCATAATAACT
TATTGACAAAGTTCCTTAGTACAGGTATGGTTTTTGAAAATCTTGCTAAAACCGTTTTATCTAATTTACT
TGATGGAAACTTGCAAGGTATGTTAAACATTTCACAACACCAATGCGTAAAAAAACAATGTCCACAAAAT
TCTGGATGTTTCAGACATTTAGATGAAAGAGAAGAATGTAAATGTTTATTAAATTACAAACAAGAAGGTG
ATAAATGTGTTGAAAATCCAAATCCTACTTGTAACGAAAATAATGGTGGATGTGATGCAGATGCCAAATG
TACCGAAGAAGATTCAGGTAGCAACGGAAAGAAAATCACATGTGAATGTACTAAACCTGATTCTTATCCA
CTTTTCGATGGTATTTTCTGCAGTTCCTCTAACTTCTTAGGAATATCATTCTTATTAATACTCATGTTAA
TATTATACAGTTTCATTTAA

>AB276015.1 Plasmodium falciparum msp1 gene for merozoite surface protein-1, complete cds, isolate: T838
ATGAAGATCATATTCTTTTTATGTTCATTTCTTTTTTTTATTATAAATACACAATGTGTAACACATGAAA
GTTATCAAGAACTTGTCAAAAAACTAGAAGCTTTAGAAGATGCAGTATTGACAGGTTATGGTTTATTTCA
AAAGGAAAAAATGGTATTAAAGGATGGAGCAAATACTCAAGTTGTTGCAAAGCCTGCAGGTGCTGTAAGT
ACTCAAAGTGCTAAAAATCCTCCAGGTGCTACAGTACCTTCAGGTACTGCAAGTACTAAAGGTGCTATAA
GATCTCCAGGTGCTGCAAATCCTTCAGATGATTCAAGTGATTCAGATGCTAAATCTTACGCTGATTTAAA
ACATAGAGTTCAAAATTACTTGTTCACTATTAAAGAACTCAAATATCCCGAACTCTTTGATTTAACCAAT
CATATGTTAACTTTGTGTGATAATATTCATGGTTTCAAATATTTAATTGATGGATATGAAGAAATTAATG
AATTATTATATAAATTAAACTTTTATTATGATTTATTAAGAGCCAAATTAAATGATGCATGTGCCAATAG
TTATTGTCAAATACCTTTCAATCTTAAAATTCGTGCAAATGAATTAGACGTACTTAAAAAAATTGTGTTC
GGATATAGAAAACCATTAGACAATATTAAAGATAATGTAGGAAAAATGGAAGATTACATTAAAAAAAATA
AAACAACCATAGCAAATATAAATGAATTAATTGAAGGAAGTAAGAAAACAATTGATCAAAATAAGAATGC
AGATAATGAAGAAGGAAAAAAAAAATTATACCAAGCTCAATATAATCTTTTTATTTACAATAAACAATTA
CAAGAAGCACATAATTTAATAAGCGTTTTAGAAAAACGTATTGACACTTTAAAAAAAAATGAAAACATAA
AGAAATTACTTGATAAGATAAATGAAATTAAAAATCCCCCACCGGCCAATTCTGGAAATACACCAAATCC
TCTCCCTGAGAATAAGAAAAAAGAAGTCGAGGGACACGAAGAAAAAATAAAAGAAATTGCCAAAACTATT
AAATTTAACATTGATAGTTTATTTACTGATCCACTTGAATTAGAATATTATTTAAGAGAAAAAAATAAAA
AAGTTGATGTAACACCTAAATCACAAGATCCTACGAAATCTGTTCAAATACCAAAAGTTCCTTATCCAAA
TGGTATTGTATATCCTTTACCACTCACTGATATTCATAATTCATTAGCTGCAGATAATGATAAAAATTCA
TATGGTGATTTAATGAATCCTGATACTAAAGAAAAAATTAATGAAAAAATTATTACAGATAATAAGGAAA
GAAAAATATTCATTAATAACATTAAAAAACAAATTGATTTAGAAGAAAAAAACATTAATCACACAAAAGA
ACAAAATAAAAAATTACTTGAAGATTATGAAAAGTCAAAAAAGGATTATGAAGAATTACTTGAAAAATTT
TATGAAATGAAATTTAATAATAATTTTGACAAAGATGTCGTAGATAAAATGTTCAGTGCAAGATATACAT
ATAATGTTGAAAAACAAAAATATAATAATAAATTTTCATCCTCTAATAATTCTGTATATAATGTTCAAAA
ATTAAAAAAGGCTCTTTCATATCTTGAAGATTATTCTTTAAGAAAAGGAATTTCTGAAAAAGATTTTAAT
CATTATTATACTTTGAAAACTGGCCTCGAAGCTGATATAAAAAAATTAACAGAAGAAATAAAGAGTAGTG
AAAACAAAATTCTAGAAAAAAATTTTAAAGGACTAACACATTCAGCAAATGCTTCCTTAGAAGTATCTGA
TATTGTAAAATTACAAGTACAAAAAGTTTTATTAATTAAAAAAATAGAAGACTTAAGAAAGATAGAATTA
TTTTTAAAAAATGCACAACTAAAAGATAGTATTCATGTACCAAATATTTATAAACCACAAAATAAACCAG
AACCATATTATTTAATTGTATTAAAAAAAGAAGTAGATAAATTAAAAGAATTTATACCAAAAGTAAAAGA
CATGTTAAAGAAAGAACAAGCTGTCTTATCAAGTATTACACAACCTTTAGTTGCAGCAAGCGAAACAACT
GAAGATGGGGGTCACTCCACACACACATTATCCCAATCAGGAGAAACAGAAGTAACAGAAGAAACAGTAG
GACACACAACGGTAACAATAACATTACCACCAAAAGAAGTAAAAGTTGTTGAAAATTCAATAGAACATAA
GAGTAATGACAATTCACAAGCCTTGACAAAAACAGTTTATCTAAAGAAATTAGATGAATTTTTAACTAAA
TCATATATATGTCATAAATATATTTTAGTATCAAACTCTAGTATGGACCAAAAATTATTAGAGGTATATA
ATCTTACTCCAGAAGAAAAAAATGAATTAAAATCATGTGATCCATTAGATTTATTATTTAATATTCAAAA
TAACATACCTGCTATGTATTCATTATATGATAGTATGAACAATGATTTACAACATCTCTTTTTTGAATTA
TATCAAAAGGAAATGATTTATTATTTACATAAACTAAAAGAGGAAAATCACATCAAAAAATTATTAGAGG
AGCAAAAACAAATAACTGGAACATCATCTACATCCAGTCCTGGAAATACAACCGTAAATACTGCTCAATC
CGCAACTCACAGTAATTCCCAAAACCAACAATCAAATGCATCCTCTACCAATACCCAAAATGGTGTAGCT
GTATCATCTGGTCCTGCTGTAGTTGAAGAAAGTCATGATCCCTTAACAGTATTGTCTATTAGTAACGATT
TGAAAGGTATTGTTAGTCTCTTAAATCTTGGAAATAAAACTAAAGTACCTAATCCATTAACCATTTCTAC
AACAGAGATGGAAAAATTTTATGAGAATATTTTAAAAAATAATGATACCTATTTTAATGATGATATCAAA
CAATTCGTAAAATCTAATTCAAAAGTAATTACAGGTTTGACCGAAACACAAAAAAATGCATTAAATGATG
AAATTAAAAAATTAAAAGATACTTTACAGTTATCATTTGATTTATATAATAAATATAAATTAAAATTAGA
TAGATTATTTAATAAGAAAAAAGAACTTGGCCAAGACAAAATGCAAATTAAAAAACTTACTTTATTAAAA
GAACAATTAGAATCAAAATTGAATTCACTTAATAACCCACATAATGTATTACAAAACTTTTCTGTTTTCT
TTAACAAAAAAAAAGAAGCTGAAATAGCAGAAACTGAAAACACATTAGAAAACACAAAAATATTATTGAA
ACATTATAAAGGACTTGTTAAATATTATAATGGTGAATCATCTCCATTAAAAACTTTAAGTGAAGTATCA
ATTCAAACAGAAGATAATTATGCCAATTTAGAAAAATTTAGAGTATTAAGTAAAATAGATGGAAAACTCA
ATGATAATTTACATTTAGGAAAGAAAAAATTATCTTTCTTATCAAGTGGATTACATCATTTAATTACTGA
ATTAAAAGAAGTAATAAAAAATAAAAATTATACAGGTAATTCTCCAAGTGAAAATAATAAGAAAGTTAAC
GAAGCTTTAAAATCTTACGAAAATTTTCTCCCAGAAGCAAAAGTTACAACAGTTGTAACTCCACCTCAAC
CAGATGTAACTCCATCTCCATTATCTGTAAGGGTAAGTGGTAGTTCAGGATCCACAAAAGAAGAAACACA
AATACCAACTTCAGGCTCTTTATTAACAGAATTACAACAAGTAGTACAATTACAAAATTATGACGAAGAA
GATGATTCCTTAGTTGTATTACCCATTTTTGGAGAATCCGAAGATAATGACGAATATTTAGATCAAGTAG
TAACTGGAGAAGCAATATCTGTCACAATGGATAATATCCTCTCAGGATTTGAAAATGAATATGATGTTAT
ATATTTAAAACCTTTAGCTGGAGTATATAGAAGCTTAAAAAAACAAATTGAAAAAAACATTATTACATTT
AATTTAAATTTGAACGATATCTTAAATTCACGTCTTAAGAAACGAAAATATTTCTTAGATGTATTAGAAT
CTGATTTAATGCAATTTAAACATATATCCTCAAATGAATACATTATTGAAGATTCATTTAAATTATTGAA
TTCAGAACAAAAAAACACACTTTTAAAAAGTTACAAATATATAAAAGAATCAGTAGAAAATGATATTAAA
TTTGCACAGGAAGGTATAAGTTATTATGAAAAGGTTTTAGCGAAATATAAGGATGATTTAGAATCAATTA
AAAAAGTTATCAAAGAAGAAAAGGAGTTCCCATCATCACCACCAACAACACCTCCGTCACCAGCAAAAAC
AGACGAACAAAAGAAGGAAAGTAAGTTCCTTCCATTTTTAACAAACATTGAGACCTTATACAATAACTTA
GTTAATAAAATTGACGATTACTTAATTAACTTAAAGGCAAAGATTAACGATTGTAATGTTGAAAAAGATG
AAGCACATGTTAAAATAACTAAACTTAGTGATTTAAAAGCAATTGATGACAAAATAGATCTTTTTAAAAA
CACTAACGACTTCGAAGCAATTAAAAAATTGATAAATGATGATACGAAAAAAGATATGCTTGGCAAATTA
CTTAGTACAGGATTAGTTCAAAATTTTCCTAATACAATAATATCAAAATTAATTGAAGGAAAATTCCAAG
ATATGTTAAACATTTCACAACACCAATGCGTAAAAAAACAATGTCCAGAAAATTCTGGATGTTTCAGACA
TTTAGATGAAAGAGAAGAATGTAAATGTTTATTAAATTACAAACAAGAAGGTGATAAATGTGTTGAAAAT
CCAAATCCTACTTGTAACGAAAATAATGGTGGATGTGATGCAGATGCCAAATGTACCGAAGAAGATTCAG
GTAGCAACGGAAAGAAAATCACATGTGAATGTACTAAACCTGATTCTTATCCACTTTTCGATGGTATTTT
CTGCAGTTCCTCTAACTTCTTAGGAATATCATTCTTATTAATACTCATGTTAATATTATACAGTTTCATT
TAA

>AB276016.1 Plasmodium falciparum msp1 gene for merozoite surface protein-1, complete cds, isolate: T842
ATGAAGATCATATTCTTTTTATGTTCATTTCTTTTTTTTATTATAAATACACAATGTGTAACACATGAAA
GTTATCAAGAACTTGTCAAAAAACTAGAAGCTTTAGAAGATGCAGTATTGACAGGTTATAGTTTATTTCA
AAAGGAAAAAATGGTATTAAATGAAGGAACAAGTGGAACAGCTGTTACAACTAGTACACCTGGTTCAGGT
GGTTCAGTTACTTCAGGTGGTTCAGGTGGTTCAGTTGCTTCAGTTGCTTCAGGTGGTTCAGGTGGCTCAG
TTGCTTCAGGTGGTTCAGGTAATTCAAGACGTACAAATCCTTCAGATAATTCAAGTGATTCAGATGCTAA
ATCTTACGCTGATTTAAAACATAGAGTTCAAAATTACTTGTTCACTATTAAAGAACTCAAATATCCCGAA
CTCTTTGATTTAACCAATCATATGTTAACTTTGTGTGATAATATTCATGGTTTCAAATATTTAATTGATG
GATATGAAGAAATTAATGAATTATTATATAAATTAAACTTTTATTATGATTTATTAAGAGCCAAATTAAA
TGATGCATGTGCCAATAGTTATTGTCAAATACCTTTCAATCTTAAAATTCGTGCAAATGAATTAGACGTA
CTTAAAAAAATTGTGTTCGGATATAGAAAACCATTAGACAATATTAAAGATAATGTAGGAAAAATGGAAG
ATTACATTAAAAAAAATAAAACAACCATAGCAAATATAAATGAATTAATTGAAGGAAGTAAGAAAACAAT
TGATCAAAATAAGAATGCAGATAATGAAGAAGGAAAAAAAAAATTATACCAAGCTCAATATAATCTTTTT
ATTTACAATAAACAATTACAAGAAGCACATAATTTAATAAGCGTTTTAGAAAAACGTATTGACACTTTAA
AAAAAAATGAAAACATAAAGAAATTACTTGAAGATATAGATAAAATTAAAACAGATGCCGAAAAACCCAC
TACTGGAAGTAAACCAAATACTCTCCTTGATAAGAACAAAAAAATCGAGGAACACGAAGAAAAAATAAAA
GAAATTGCCAAAACTATTAAATTTAACATTGATAGTTTATTTACTGATCCACTTGAATTAGAATATTATT
TAAGAGAAAAAAATAAAAAAGTTGATGTAACACCTAAATCACAAGATCCTACGAAATCTGTTCAAATACC
AAAAGTTCCTTATCCAAATGGTATTGTATATCCTTTACCACTCACTGATATTCATAATTCATTAGCTGCA
GATAATGATAAAAATTCATATGGTGATTTAATGAATCCTGATACTAAAGAAAAAATTAATGAAAAAATTA
TTACAGATAATAAGGAAAGAAAAATATTCATTAATAACATTAAAAAACAAATTGATTTAGAAGAAAAAAA
CATTAATCACACAAAAGAACAAAATAAAAAATTACTTGAAGATTATGAAAAGTCAAAAAAGGATTATGAA
GAATTACTTGAAAAATTTTATGAAATGAAATTTAATAATAATTTTAACAAAGATGTCGTAGATAAAATGT
TCAGTGCAAGATATACATATAATGTTGAAAAACAAAGATATAATAATAAATTTTCATCCTCTAATAATTC
TGTATATAATGTTCAAAAATTAAAAAAGGCTCTTTCATATCTTGAAGATTATTCTTTAAGAAAAGGAATT
TCTGAAAAAGATTTTAATCATTATTATACTTTGAAAACTGGCCTCGAAGCTGATATAAAAAAATTAACAG
AAGAAATAAAGAGTAGTGAAAACAAAATTTTAGAAAAAAATTTTAAAGGACTAACACATTCAGCAAATGC
TTCCTTAGAAGTATCTGATATTGTAAAATTACAAGTACAAAAAGTTTTATTAATTAAAAAAATAGAAGAC
TTAAGAAAGATAGAATTATTTTTAAAAAATGCACAACTAAAAGATAGTATTCATGTACCAAATATTTATA
AACCACAAAATAAACCAGAACCATATTATTTAATTGTATTAAAAAAAGAAGTAGATAAATTAAAAGAATT
TATACCAAAAGTAAAAGACATGTTAAAGAAAGAACAAGCTGTCTTATCAAGTATTACACAACCTTTAGTT
GCAGCAAGCGAAACAACTGAAGATGGGGGTCACTCCACACACACATTATCCCAATCAGGAGAAACAGAAG
TAACAGAAGAAACAGTAGGACACACAACAACGGTAACAATAACATTACCACCAACACAACCATCACCACC
AAAAGAAGTAAAAGTTGTTGAAAATTCAATAGAACATAAGAGTAATGACAATTCACAAGCCTTGACAAAA
ACAGTTTATCTAAAGAAATTAGATGAATTTTTAACTAAATCATATATATGTCATAAATATATTTTAGTAT
CAAACTCTAGTATGGACCAAAAATTATTAGAGGTATATAATCTTACTCCAGAAGAAAAAAATGAATTAAA
ATCATGTGATCCATTAGATTTATTATTTAATATTCAAAATAACATACCTGCTATGTATTCATTATATGAT
AGTATGAACAATGATTTACAACATCTCTTTTTTGAATTATATCAAAAGGAAATGATTTATTATTTACATA
AACTAAAAGAGGAAAATCACATCAAAAAATTATTAGAGGAGCAAAAACAAATAACTGGAACATCATCTAC
ATCCAGTCCTGGAAATACAACCGTAAATACTGCTCAATCCGCAACTCACAGTAATTCCCAAAACCAACAA
TCAAATGCATCCTCTACCAATACCCAAAATGGTGTAGCTGTATCATCTGGTCCTGCTGTAGTTGAAGAAA
GTCATGATCCCTTAACAGTATTGTCTATTAGTAACGATTTGAAAGGTATTGTTAGTCTCTTAAATCTTGG
AAATAAAACTAAAGTACCTAATCCATTAACCATTTCTACAACAGAGATGGAAAAATTTTATGAGAATATT
TTAAAAAATAATGATACCTATTTTAATGATGATATCAAACAATTCGTAAAATCTAATTCAAAAGTAATTA
CAGGTTTGACCGAAACACAAAAAAATGCATTAAATGATGAAATTAAAAAATTAAAAGATACTTTACAGTT
ATCATTTGATTTATATAATAAATATAAATTAAAATTAGATAGATTATTTAATAAGAAAAAAGAACTTGGC
CAAGACAAAATGCAAATTAAAAAACTTACTTTATTAAAAGAACAATTAGAATCAAAATTGAATTCACTTA
ATAACCCACATAATGTATTACAAAACTTTTCTGTTTTCTTTAACAAAAAAAAAGAAGCTGAAATAGCAGA
AACTGAAAACACATTAGAAAACACAAAAATATTATTGAAACATTATAAAGGACTTGTTAAATATTATAAT
GGTGAATCATCTCCATTAAAAACTTTAAGTGAAGTATCAATTCAAACAGAAGATAATTATGCCAATTTAG
AAAAATTTAGAGTATTAAGTAAAATAGATGGAAAACTCAATGATAATTTACATTTAGGAAAGAAAAAATT
ATCTTTCTTATCAAGTGGATTACATCATTTAATTACTGAATTAAAAGAAGTAATAAAAAATAAAAATTAT
ACAGGTAATTCTCCAAGTGAAAATAATAAGAAAGTTAACGAAGCTTTAAAATCTTACGAAAATTTTCTCC
CAGAAGCAAAAGTTACAACAGTTGTAACTCCACCTCAACCAGATGTAACTCCATCTCCATTATCTGTAAG
GGTAAGTGGTAGTTCAGGATCCACAAAAGAAGAAACACAAATACCAACTTCAGGCTCTTTATTAACAGAA
TTACAACAAGTAGTACAATTACAAAATTATGACGAAGAAGATGATTCCTTAGTTGTATTACCCATTTTTG
GAGAATCCGAAGATAATGACGAATATTTAGATCAAGTAGTAACTGGAGAAGCAATATCTGTCACAATGGA
TAATATCCTCTCAGGATTTGAAAATGAATATGATGTTATATATTTAAAACCTTTAGCTGGAGTATATAGA
AGCTTAAAAAAACAAATTGAAAAAAACATTATTACATTTAATTTAAATTTGAACGATATCTTAAATTCAC
GTCTTAAGAAACGAAAATATTTCTTAGATGTATTAGAATCTGATTTAATGCAATTTAAACATATATCCTC
AAATGAATACATTATTGAAGATTCATTTAAATTATTGAATTCAGAACAAAAAAACACACTTTTAAAAAGT
TACAAATATATAAAAGAATCAGTAGAAAATGATATTAAATTTGCACAGGAAGGTATAAGTTATTATGAAA
AGGTTTTAGCGAAATATAAGGATGATTTAGAATCAATTAAAAAAGTTATCAAAGAAGAAAAGGAGTTCCC
ATCATCACCACCAACAACACCTCCGTCACCAGCAAAAACAGACGAACAAAAGAAGGAAAGTAAGTTCCTT
CCATTTTTAACAAACATTGAGACCTTATACAATAACTTAGTTAATAAAATTGACGATTACTTAATTAACT
TAAAGGCAAAGATTAACGATTGTAATGTTGAAAAAGATGAAGCACATGTTAAAATAACTAAACTTAGTGA
TTTAAAAGCAATTGATGACAAAATAGATCTTTTTAAAAACACTAACGACTTCGAAGCAATTAAAAAATTG
ATAAATGATGATACGAAAAAAGATATGCTTGGCAAATTACTTAGTACAGGATTAGTTCAAAATTTTCCTA
ATACAATAATATCAAAATTAATTGAAGGAAAATTCCAAGATATGTTAAACATTTCACAACACCAATGCGT
AAAAAAACAATGTCCAGAAAATTCTGGATGTTTCAGACATTTAGATGAAAGAGAAGAATGTAAATGTTTA
TTAAATTACAAACAAGAAGGTGATAAATGTGTTGAAAATCCAAATCCTACTTGTAACGAAAATAATGGTG
GATGTGATGCAGATGCCAAATGTACCGAAGAAGATTCAGGTAGCAACGGAAAGAAAATCACATGTGAATG
TACTAAACCTGATTCTTATCCACTTTTCGATGGTATTTTCTGCAGTTCCTCTAACTTCTTAGGAATATCA
TTCTTATTAATACTCATGTTAATATTATACAGTTTCATTTAA

>AB276017.1 Plasmodium falciparum msp1 gene for merozoite surface protein-1, complete cds, isolate: T844
ATGAAGATCATATTCTTTTTATGTTCATTTCTTTTTTTTATTATAAATACACAATGTGTAACACATGAAA
GTTATCAAGAACTTGTCAAAAAACTAGAAGCTTTAGAAGATGCAGTATTGACAGGTTATAGTTTATTTCA
TAAGGAAAAAATGATCTTAAATGAAGAAGAAATTACTACAAAAGGTGCAAGTGCTCAAAGTGGTACAAGT
GGTACAAGTGGTCCAAGTGGTCCAAGTGGTACAAGTCCATCATCTCGTTCAAACACTTTACCTCGTTCAA
ATACTTCATCTGGTGCAAGCCCTCCAGCTGATGCAAGCGATTCAGATGCTAAATCTTACGCTGATTTAAA
ACACAGAGTACGAAATTACTTGTTAACTATCAAAGAACTCAAATATCCTCAACTCTTTGATTTAACTAAT
CATATGTTAACTTTGTGTGATAATATTCATGGTTTCAAATATTTAATTGATGGATATGAAGAAATTAATG
AATTATTATATAAATTAAACTTTTATTTTGATTTATTAAGAGCAAAATTAAATGATGTATGTGCTAATGA
TTATTGTCAAATACCTTTCAATCTTAAAATTCGTGCAAATGAATTAGACGTACTTAAAAAACTTGTGTTC
GGATATAGAAAACCATTAGACAATATTAAAGATAATGTAGGAAAAATGGAAGATTACATTAAAAAAAATA
AAAAAACCATAGAAAATATAAATGAATTAATTGAAGAAAGTAAGAAAACAATTGATAAAAATAAGAATGC
AACTAAAGAAGAAGAAAAAAAAAAATTATACCAAGCTCAATATGATCTTTTTATTTACAATAAACAATTA
GAAGAAGCACATAATTTAATAAGCGTTTTAGAAAAACGTATTGACACTTTAAAAAAAAATGAAAACATTA
AGGAATTACTTGATAAGATAAATGAAATTAAAAATCCCCCACCGGCCAATTCTGGAAATACACCAAATAC
TCTCCTTGATAAGAACAAAAAAATCGAGGAACACGAAAAAGAAATAAAAGAAATTGCCAAAACTATTAAA
TTTAATATTGATAGTTTATTTACTGATCCACTTGAATTAGAATACTATTTAAGAGAAAAAAATAAAAATA
TTGATATAAGTGCAAAGGTTGAAACAAAGGAATCAACTGAACCCAATGAATATCCAAATGGAGTTACTTA
TCCTTTGTCATATAACGATATTAACAATGCTTTAAATGAACTTAATTCTTTTGGTGATTTAATTAATCCA
TTTGATTATACAAAAGAACCAAGTAAAAACATATATACTGATAATGAAAGAAAAAAATTCATAAATGAAA
TTAAGGAAAAAATTAAAATAGAAAAAAAAAAAATTGAATCTGATAAAAAATCTTACGAAGACAGATCTAA
GTCTTTAAATGATATAACAAAAGAATATGAAAAATTACTTAATGAAATTTATGATAGCAAATTCAATAAT
AATATAGATTTAACTAATTTCGAAAAAATGATGGGTAAAAGATATTCATATAAAGTTGAGAAACTTACAC
ACCATAATACTTTTGCATCCTATGAAAATTCTAAACATAATCTTGAAAAGTTAACAAAAGCTCTTAAATA
TATGGAAGATTATTCTTTAAGGAATATAGTAGTTGAAAAAGAATTAAAATATTATAAAAATTTAATAAGC
AAAATAAAAAATGAGATTGAAACATTAGTTGAAAATATTAAAAAAGATGAAGAACAGCTTTTTGAAAAAA
AAATTACTAAAGACGAAAATAAACCAGATGAAAAAATTTTAGAAGTATCTGACATTGTAAAAGTACAAGT
TCAAAAAGTTTTATTAATGAACAAAATTGACGAATTAAAAAAGACTCAATTGATTTTAAAAAATGTAGAA
TTAAAACATAATATACATGTTCCCAATTCTTACAAACAAGAAAATAAGCAAGAACCTTATTATTTAATTG
TGTTGAAAAAAGAAATTGATAAATTAAAAGTGTTCATGCCTAAGGTAGAATCATTGATAAATGAAGAAAA
AAAAAACATAAAAACAGAAGGTCAATCGGATAATTCGGAACCATCAACCGAAGGAGAAATAACAGGACAA
GCAACTACAAAACCTGGACAACAAGCAGGATCTGCTTTAGAAGGAGATTCAGTACAAGCACAAGCACAAG
AACAAAAACAAGCACAACCACCAGTACCAGTACCAGTACCAGAAGCAAAAGCACAAGTCCCAACACCACC
AGCACCAGTAAATAATAAAACTGAAAATGTTTCCAAATTAGATTATCTTGAAAAATTATATGAATTTTTA
AATACTTCATATATATGTCACAAATATATTTTGGTTTCACACTCAACTATGAACGAAAAGATATTAAAAC
AATATAAAATTACAAAGGAGGAAGAAAGCAAATTAAGTTCATGTGATCCATTAGACTTATTGTTTAATAT
ACAAAATAACATACCTGTAATGTATTCTATGTTTGATAGCTTAAACAATAGTTTATCACAACTATTTATG
GAAATTTATGAAAAAGAAATGGTTTGTAATTTATATAAACTTAAGGATAATGACAAAATTAAAAATTTAT
TAGAGGAAGCGAAAAAAGTATCCACATCTGTAAAAACTCTTTCAAGTTCATCAATGCAACCATTATCATT
AACACCTCAGGATAAACCCGAAGTAAGTGCAAATGATGATACATCACATTCTACAAATTTGAATAATAGT
TTAAAATTATTTGAAAACATATTGAGTCTTGGAAAAAACAAAAATATATACCAAGAATTAATAGGTCAAA
AAAGTAGTGAAAACTTTTATGAAAAGATATTAAAAGATAGTGATACATTTTATAATGAATCTTTTACAAA
TTTTGTAAAATCTAAAGCTGATGATATTAATTCATTGAATGATGAATCAAAAAGGAAGAAATTAGAAGAA
GATATTAATAAATTAAAAAAAACTTTACAGTTATCATTTGATTTATATAATAAATATAAATTAAAATTAG
AAAGATTATTTGATAAAAAGAAAACAGTTGGTAAATATAAAATGCAAATTAAAAAACTTACTTTATTAAA
AGAACAATTAGAATCAAAATTGAATTCACTTAATAACCCAAAGCATGTATTACAAAACTTTTCTGTTTTC
TTTAACAAAAAAAAAGAAGCTGAAATAGCAGAAACTGAAAACACATTAGAAAACACAAAAATATTATTGA
AACATTATAAAGGACTTGTTAAATATTATAATGGTGAATCATCTCCATTAAAAACTTTAAGTGAAGAATC
AATTCAAACAGAAGATAATTATGCCAGTTTAGAAAACTTTAAAGTATTAAGTAAATTAGAAGGAAAATTA
AAGGATAATTTAAATTTAGAAAAGAAAAAATTATCATACTTATCAAGTGGATTACATCATTTAATTGCTG
AATTAAAAGAAGTAATAAAAAATAAAAATTATACAGGTAATTCTCCAAGTGAAAATAATACGGATGTTAA
CAATGCATTAGAATCTTACAAAAAATTTCTCCCAGAAGGAACAGATGTTGCAACAGTTGTAAGTGAAAGT
GGATCCGACACATTAGAACAAAGTCAACCAAAGAAACCAGCATCAACTCATGTAGGAGCAGAGTCTAACA
CAATAACAACATCACAAAATGTCGATGATGAAGTAGATGACGTAATCATAGTACCTATATTTGGAGAATC
CGAAGAAGATTATGATGATTTAGGACAAGTAGTAACAGGAGAAGCAGTAACTCCTTCCGTAATTGATAAC
ATACTTTCTAAAATTGAAAATGAATATGAGGTTTTATATTTAAAACCTTTAGCAGGTGTTTATAGAAGTT
TAAAAAAACAATTAGAAAATAACGTTATGACATTTAATGTTAATGTTAAGGATATTTTAAATTCACGATT
TAATAAACGTGAAAATTTCAAAAATGTTTTAGAATCAGATTTAATTCCATATAAAGATTTAACATCAAGT
AATTATGTTGTCAAAGATCCATATAAATTTCTTAATAAAGAAAAAAGAGATAAATTCTTAAGCAGTTATA
ATTATATTAAGGATTCAATAGATACGGATATAAATTTTGCAAATGATGTTCTTGGATATTATAAAATATT
ATCCGAAAAATATAAATCAGATTTAGATTCAATTAAAAAATATATCAACGACAAACAAGGTGAAAATGAG
AAATACCTTCCCTTTTTAAACAATATTGAGACCTTATATAAAACAGTTAATGATAAAATTGATTTATTTG
TAATTCATTTAGAAGCAAAAGTTCTAAATTATACATATGAGAAATCAAACGTAGAAGTTAAAATAAAAGA
ACTTAATTACTTAAAAACAATTCAAGACAAATTGGCAGATTTTAAAAAAAATAACAATTTCGTTGGAATT
GCTGATTTATCAACAGATTATAACCATAATAACTTATTGACAAAGTTCCTTAGTACAGGTATGGTTTTTG
AAAATCTTGCTAAAACCGTTTTATCTAATTTACTTGATGGAAACTTGCAAGGTATGTTAAACATTTCACA
ACACCAATGCGTAAAAAAACAATGTCCAGAAAATTCTGGATGTTTCAGACATTTAGATGAAAGAGAAGAA
TGTAAATGTTTATTAAATTACAAACAAGAAGGTGATAAATGTGTTGAAAATCCAAATCCTACTTGTAACG
AAAATAATGGTGGATGTGATGCAGATGCCAAATGTACCGAAGAAGATTCAGGTAGCAACGGAAAGAAAAT
CACATGTGAATGTACTAAACCTGATTCTTATCCACTTTTCGATGGTATTTTCTGCAGTTCCTCTAACTTC
TTAGGAATATCATTCTTATTAATACTCATGTTAATATTATACAGTTTCATTTAA

>AB276018.1 Plasmodium falciparum msp1 gene for merozoite surface protein-1, complete cds, isolate: T946
ATGAAGATCATATTCTTTTTATGTTCATTTCTTTTTTTTATTATAAATACACAATGTGTAACACATGAAA
GTTATCAAGAACTTGTCAAAAAACTAGAAGCTTTAGAAGATGCAGTATTGACAGGTTATGGTTTATTTCA
TAAGGAAAAAATGATCTTAAATGAAGAAGAAATTACTACAAAAGGTGCAAGTGCTCAAAGTGGTACAAGT
GGTACAAGTGGTACAAGTGGTACAAGTGGTACAAGTGGTACAAGTGGTCCAAGTGGTCCAAGTGGTACAA
GTCCATCATCTCGTTCAAACACTTTACCTCGTTCAAATACTTCATCTGGTGCAAGCCCTCCAGCTGATGC
AAGCGATTCAGATGCTAAATCTTACGCTGATTTAAAACACAGAGTACGAAATTACTTGTTCACTATTAAA
GAACTCAAATATCCCGAACTCTTTGATTTAACCAATCATATGTTAACTTTGTGTGATAATATTCATGGTT
TCAAATATTTAATTGATGGATATGAAGAAATTAATGAATTATTATATAAATTAAACTTTTATTTTGATTT
ATTAAGAGCAAAATTAAATGATGTATGTGCTAATGATTATTGTCAAATACCTTTCAATCTTAAAATTCGT
GCAAATGAATTAGACGTACTTAAAAAACTTGTGTTCGGATATAGAAAACCATTAGACAATATTAAAGATA
ATGTAGGAAAAATGGAAGATTACATTAAAAAAAATAAAACAACCATAGCAAATATAAATGAATTAATTGA
AGGAAGTAAGAAAACAATTGATCAAAATAAGAATGCAGATAATGAAGAAGGAAAAAAAAAATTATACCAA
GCTCAATATAATCTTTTTATTTACAATAAACAATTACAAGAAGCACATAATTTAATAAGCGTTTTAGAAA
AACGTATTGACACTTTAAAAAAAAATGAAAACATAAAGAAATTACTTGAAGATATAGATAAAATTAAAAC
AGATGCCGAAAAACTCACTACTGGAAGTAAACCAAATCCTCTCCCTGAGAATAAGAAAAAAGAAGTCGAG
GGACACGAAGAAAAAATAAAAGAAATTGCCAAAACTATTAAATTTAACATTGATAGTTTATTTACTGATC
CACTTGAATTAGAATATTATTTAAGAGAAAAAAATAAAAAAGTTGATGTAACACCTAAATCACAAGATCC
TACGAAATCTGTTCAAATACCAAAAGTTCCTTATCCAAATGGTATTGTATATCCTTTACCACTCACTGAT
ATTCATAATTCATTAGCTGCAGATAATGATAAAAATTCATATGGTGATTTAATGAATCCTGATACTAAAG
AAAAAATTAATGAAAAAATTATTACAGATAATAAGGAAAGAAAAATATTCATTAATAACATTAAAAAACA
AATTGATTTAGAAGAAAAAAACATTAATCACACAAAAGAACAAAATAAAAAATTACTTGAAGATTATGAA
AAGTCAAAAAAGGATTATGAAGAATTACTTGAAAAATTTTATGAAATGAAATTTAATAATAATTTTAACA
AAGATGTCGTAGATAAAATGTTCAGTGCAAGATATACATATAATGTTGAAAAACAAAGATATAATAATAA
ATTTTCATCCTCTAATAATTCTGTATATAATGTTCAAAAATTAAAAAAGGCTCTTTCATATCTTGAAGAT
TATTCTTTAAGAAAAGGAATTTCTGAAAAAGATTTTAATCATTATTATACTTTGAAAACTGGCCTCGAAG
CTGATATAAAAAAATTAACAGAAGAAATAAAGAGTAGTGAAAACAAAATTTTAGAAAAAAATTTTAAAGG
ACTAACACATTCAGCAAATGCTTCCTTAGAAGTATCTGATATTGTAAAATTACAAGTACAAAAAGTTTTA
TTAATTAAAAAAATAGAAGACTTAAGAAAGATAGAATTATTTTTAAAAAATGCACAACTAAAAGATAGTA
TTCATGTACCAAATATTTATAAACCACAAAATAAACCAGAACCATATTATTTAATTGTATTAAAAAAAGA
AGTAGATAAATTAAAAGAATTTATACCAAAAGTAAAAGACATGTTAAAGAAAGAACAAGCTGTCTTATCA
AGTATTACACAACCTTTAGTTGCAGCAAGCGAAACAGCTGAAGATGGGGGTCACTCCACACACACATTAT
CCCAATCAGGAGAAACAGAAGTAACAGAAGAAACAGTAGGACACACAACAACGGTAACAATAACATTACC
ACCAACACAACCATCACCACCAAAAGAAGTAAAAGTTGTTGAAAATTCAATAGAACATAAGAGTAATGAC
AATTCACAAGCCTTGACAAAAACAGTTTATCTAAAGAAATTAGATGAATTTTTAACTAAATCATATATAT
GTCATAAATATATTTTAGTATCAAACTCTAGTATGGACCAAAAATTATTAGAGGTATATAATCTTACTCC
AGAAGAAAAAAATGAATTAAAATCATGTGATCCATTAGATTTATTATTTAATATTCAAAATAACATACCT
GCTATGTATTCATTATATGATAGTATGAACAATGATTTACAACATCTCTTTTTTGAATTATATCAAAAGG
AAATGATTTATTATTTACATAAACTAAAAGAGGAAAATCACATCAAAAAATTATTAGAGGAGCAAAAACA
AATAACTGGAACATCATCTACATCCAGTCCTGGAAATACAACCGTAAATACTGCTCAATCCGCAACTCAC
AGTAATTCCCAAAACCAACAATCAAATGCATCCTCTACCAATACCCAAAATGGTGTAGCTGTATCATCTG
GTCCTGCTGTAGTTGAAGAAAGTCATGATCCCTTAACAGTATTGTCTATTAGTAACGATTTGAAAGGTAT
TGTTAGTCTCTTAAATCTTGGAAATAAAACTAAAGTACCTAATCCATTAACCATTTCTACAACAGAGATG
GAAAAATTTTATGAGAATATTTTAAAAAATAATGATACCTATTTTAATGATGATATCAAACAATTCGTAA
AATCTAATTCAAAAGTAATTACAGGTTTGACCGAAACACAAAAAAATGCATTAAATGATGAAATTAAAAA
ATTAAAAGATACTTTACAGTTATCATTTGATTTATATAATAAATATAAATTAAAATTAGATAGATTATTT
AATAAGAAAAAAGAACTTGGCCAAGACAAAATGCAAATTAAAAAACTTACTTTATTAAAAGAACAATTAG
AATCAAAATTGAATTCACTTAATAACCCACATAATGTATTACAAAACTTTTCTGTTTTCTTTAACAAAAA
AAAAGAAGCTGAAATAGCAGAAACTGAAAACACATTAGAAAACACAAAAATATTATTGAAACATTATAAA
GGACTTGTTAAATATTATAATGGTGAATCATCTCCATTAAAAACTTTAAGTGAAGTATCAATTCAAACAG
AAGATAATTATGCCAATTTAGAAAAATTTAGAGTATTAAGTAAAATAGATGGAAAACTCAATGATAATTT
ACATTTAGGAAAGAAAAAATTATCTTTCTTATCAAGTGGATTACATCATTTAATTACTGAATTAAAAGAA
GTAATAAAAAATAAAAATTATACAGGTAATTCTCCAAGTGAAAATAATAAGAAAGTTAACGAAGCTTTAA
AATCTTACGAAAATTTTCTCCCAGAAGCAAAAGTTACAACAGTTGTAACTCCACCTCAACCAGATGTAAC
TCCATCTCCATTATCTGTAAGGGTAAGTGGTAGTTCAGGATCCACAAAAGAAGAAACACAAATACCAACT
TCAGGCTCTTTATTAACAGAATTACAACAAGTAGTACAATTACAAAATTATGACGAAGAAGATGATTCCT
TAGTTGTATTACCCATTTTTGGAGAATCCGAAGATAATGACGAATATTTAGATCAAGTAGTAACTGGAGA
AGCAATATCTGTCACAATGGATAATATCCTCTCAGGATTTGAAAATGAATATGATGTTATATATTTAAAA
CCTTTAGCTGGAGTATATAGAAGCTTAAAAAAACAAATTGAAAAAAACATTATTACATTTAATTTAAATT
TGAACGATATCTTAAATTCACGTCTTAAGAAACGAAAATATTTCTTAGATGTATTAGAATCTGATTTAAT
GCAATTTAAACATATATCCTCAAATGAATACATTATTGAAGATTCATTTAAATTATTGAATTCAGAACAA
AAAAACACACTTTTAAAAAGTTACAAATATATAAAAGAATCAGTAGAAAATGATATTAAATTTGCACAGG
AAGGTATAAGTTATTATGAAAAGGTTTTAGCGAAATATAAGGATGATTTAGAATCAATTAAAAAAGTTAT
CAAAGAAGAAAAGGAGTTCCCATCATCACCACCAACAACACCTCCGTCACCAGCAAAAACAGACGAACAA
AAGAAGGAAAGTAAGTTCCTTCCATTTTTAACAAACATTGAGACCTTATACAATAACTTAGTTAATAAAA
TTGACGATTACTTAATTAACTTAAAGGCAAAGATTAACGATTGTAATGTTGAAAAAGATGAAGCACATGT
TAAAATAACTAAACTTAGTGATTTAAAAGCAATTGATGACAAAATAGATCTTTTTAAAAACACTAACGAC
TTCGAAGCAATTAAAAAATTGATAAATGATGATACGAAAAAAGATATGCTTGGCAAATTACTTAGTACAG
GATTAGTTCAAAATTTTCCTAATACAATAATATCAAAATTAATTGAAGGAAAATTCCAAGATATGTTAAA
CATTTCACAACACCAATGCGTAAAAAAACAATGTCCAGAAAATTCTGGATGTTTCAGACATTTAGATGAA
AGAGAAGAATGTAAATGTTTATTAAATTACAAACAAGAAGGTGATAAATGTGTTGAAAATCCAAATCCTA
CTTGTAACGAAAATAATGGTGGATGTGATGCAGATGCCACATGTACCGAAGAAGATTCAGGTAGCAGCAG
AAAGAAAATCACATGTGAATGTACTAAACCTGATTCTTATCCACTTTTCGATGGTATTTTCTGCAGTTCC
TCTAACTTCTTAGGAATATCATTCTTATTAATACTCATGTTAATATTATACAGTTTCATTTAA

>AB300614.1 Plasmodium falciparum msp1 gene for merozoite surface protein-1, complete cds, isolate: Sud-60-93-3
ATGAAGATCATATTCTTTTTATGTTCATTTCTTTTTTTTATTATAAATACACAATGTGTAACACATGAAA
GTTATCAAGAACTTGTCAAAAAACTAGAAGCTTTAGAAGATGCAGTATTGACAGGTTATAGTTTATTTCA
AAAGGAAAAAATGGTATTAAAGGATGGAGCAAATACTCAAGTTGTTGCAAAGCCTGCAGATGCTGTAAGT
ACTCAAAGTGCTAAAAATCCTCCAGGTGCTACAGTACCTTCAGGTACTGCAAGTACTAAAGGTGCTATAA
GATCTCCAGGTGCTGCAAATCCTTCAGATGATTCAAGTGATTCAGATGCTAAATCTTACGCTGATTTAAA
ACATAGAGTTCAAAATTACTTGTTCACTATTAAAGAACTCAAATATCCCGAACTCTTTGATTTAACCAAT
CATATGTTAACTTTGTGTGATAATATTCATGGTTTCAAATATTTAATTGATGGATATGAAGAAATTAATG
AATTATTATATAAATTAAACTTTTATTTTGATTTATTAAGAGCAAAATTAAATGATGTATGTGCTAATGA
TTATTGTCAAATACCTTTCAATCTTAAAATTCGTGCAAATGAATTAGACGTACTTAAAAAACTTGTGTTC
GGATATAGAAAACCATTAGACAATATTAAAGATAATGTAGGAAAAATGGAAGATTACATTAAAAAAAATA
AAACAACCATAGCAAATATAAATGAATTAATTGAAGGAAGTAAGAAAACAATTGATCAAAATAAGAATGC
AGATAATGAAGAAGGAAAAAAAAAATTATACCAAGCTCAATATGATCTTTTTATTTACAATAAACAATTA
CAAGAAGCACATAATTTAATAAGCGTTTTAGAAAAACGTATTGACACTTTAAAAAAAAATGAAAACATAA
AGAAATTACTTGAAGATATAGATAAAATTAAAACAGATGCCGAAAAACTCACTACTGGAAGTAAACCAAA
TCCTCTCCCTGAGAATAAGAAAAAAGAAGTCGAGGGACACGAAGAAAAAATAAAAGAAATTGCCAAAACT
ATTAAATTTAACATTGATAGTTTATTTACTGATCCACTTGAATTAGAATATTATTTAAGAGAAAAAAATA
AAAAAGTTGATGTAACACCTAAATCACAAGATCCTACGAAATCTGTTCAAATACCAAAAGTTCCTTATCC
AAATGGTATTGTATATCCTTTACCACTCACTGATATTCATAATTCATTAGCTGCAGATAATGATAAAAAT
TCATATGGTGATTTAATGAATCCTGATACTAAAGAAAAAATTAATGAAAAAATTATTACAGATAATAAGG
AAAGAAAAATATTCATTAATAACATTAAAAAACAAATTGATTTAGAAGAAAAAAACATTAATCACACAAA
AGAACAAAATAAAAAATTACTTGAAGATTATGAAGAGTCAAAAAAGGATTATGAAAAATTACTTGAAAAA
TTTTATGAAATGAAATTTAATAATAATTTTGACAAAGATGTCGTAGATAAAATGTTCAGTGCAAGATATA
CATATAATGTTGAAAAACAAAGATATAATAATAAATTTTCATCCTCTAATAATTCTGTATATAATGTTCA
AAAATTAAAAAAGGCTCTTTCATATCTTGAAGATTATTCTTTAAGAAAAGGAATTTCTGAAAAAGATTTT
AATCATTATTATACTTTGAAAACTGGCCTCGAAGCTGATATAAAAAAATTAACAGAAGAAATAAAGAGTA
GTGAAAACAAAATTCTAGAAAAAAATTTTAAAGGACTAACACATTCAGCAAATGCTTCCTTAGAAGTATC
TGATATTGTAAAATTACAAGTACAAAAAGTTTTATTAATTAAAAAAATAGAAGACTTAAGAAAGATAGAA
TTATTTTTAAAAAATGCACAACTAAAAGATAGTATTCATGTACCAAATATTTATAAACCACAAAATAAAC
CAGAACCATATTATTTAATTGTATTAAAAAAAGAAGTAGATAAATTAAAAGAATTTATACCAAAAGTAAA
AGACATGTTAAAGAAAGAACAAGCTGTCTTATCAAGTATTACACAACCTTTAGTTGCAGCAAGCGAAACA
ACTGAAGATGGGGGTCACTCCACACACACATTATCCCAATCAGGAGAAACAGAAGTAACAGAAGAAACAG
AAGAAACAGAAGAAACAGTAGGACACACAACAACGGTAACAATAACATTACCACCAAAAGAAGTAAAAGT
TGTTGAAAATTCAATAGAACATAAGAGTAATGACAATTCACAAGCCTTGACAAAAACAGTTTATCTAAAG
AAATTAGATGAATTTTTAACTAAATCATATATATGTCATAAATATATTTTAGTATCAAACTCTAGTATGG
ACCAAAAATTATTAGAGGTATATAATCTTACTCCAGAAGAAAAAAATGAATTAAAATCATGTGATCCATT
AGATTTATTATTTAATATTCAAAATAACATACCTGCTATGTATTCATTATATGATAGTATGAACAATGAT
TTACAACATCTCTTTTTTGAATTATATCAAAAGGAAATGATTTATTATTTACATAAACTAAAAGAGGAAA
ATCACATCAAAAAATTATTAGAGGAGCAAAAACAAATAACTGGAACATCATCTACATCCAGTCCTGGAAA
TACAACCGTAAATACTGCTCAATCCGCAACTCACAGTAATTCCCAAAACCAACAATCAAATGCATCCTCT
ACCAATACCCAAAATGGTGTAGCTGTATCATCTGGTCCTGCTGTAGTTGAAGAAAGTCATGATCCCTTAA
CAGTATTGTCTATTAGTAACGATTTGAAAGGTATTGTTAGTCTCTTAAATCTTGGAAATAAAACTAAAGT
ACCTAATCCATTAACCATTTCTACAACAGAGATGGAAAAATTTTATGAGAATATTTTAAAAAATAATGAT
ACCTATTTTAATGATGATATCAAACAATTCGTAAAATCTAATTCAAAAGTAATTACAGGTTTGACCGAAA
CACAAAAAAATGCATTAAATGATGAAATTAAAAAATTAAAAGATACTTTACAGTTATCATTTGATTTATA
TAATAAATATAAATTAAAATTAGATAGATTATTTAATAAGAAAAAAGAACTTGGCCAAGACAAAATGCAA
ATTAAAAAACTTACTTTATTAAAAGAACAATTAGAATCAAAATTGAATTCACTTAATAACCCACATAATG
TATTACAAAACTTTTCTGTTTTCTTTAACAAAAAAAAAGAAGCTGAAATAGCAGAAACTGAAAACACATT
AGAAAACACAAAAATATTATTGAAACATTATAAAGGACTTGTTAAATATTATAATGGTGAATCATCTCCA
TTAAAAACTTTAAGTGAAGTATCAATTCAAACAGAAGATAATTATGCCAATTTAGAAAAATTTAGAGTAT
TAAGTAAAATAGATGGAAAACTCAATGATAATTTACATTTAGGAAAGAAAAAATTATCTTTCTTATCAAG
TGGATTACATCATTTAATTACTGAATTAAAAGAAGTAATAAAAAATAAAAATTATACAGGTAATTCTCCA
AGTGAAAATAATAAGAAAGTTAACGAAGCTTTAAAATCTTACGAAAATTTTCTCCCAGAAGCAAAAGTTA
CAACAGTTGTAACTCCACCTCAACCAGATGTAACTCCATCTCCATTATCTGTAAGGGTAAGTGGTAGTTC
AGGATCCACAAAAGAAGAAACACAAATACCAACTTCAGGCTCTTTATTAACAGAATTACAACAAGTAGTA
CAATTACAAAATTATGACGAAGAAGATGATTCCTTAGTTGTATTACCCATTTTTGGAGAATCCGAAGATA
ATGACGAATATTTAGATCAAGTAGTAACTGGAGAAGCAATATCTGTCACAATGGATAATATCCTCTCAGG
ATTTGAAAATGAATATGATGTTATATATTTAAAACCTTTAGCTGGAGTATATAGAAGCTTAAAAAAACAA
ATTGAAAAAAACATTTTTACATTTAATTTAAATTTGAACGATATCTTAAATTCACGTCTTAAGAAACGAA
AATATTTCTTAGATGTATTAGAATCTGATTTAATGCAATTTAAACATATATCCTCAAATGAATACATTAT
TGAAGATTCATTTAAATTATTGAATTCAGAACAAAAAAACACACTTTTAAAAAGTTACAAATATATAAAA
GAATCAGTAGAAAATGATATTAAATTTGCACAGGAAGGTATAAGTTATTATGAAAAGGTTTTAGCGAAAT
ATAAGGATGATTTAGAATCAATTAAAAAAGTTATCAAAGAAGAAAAGGAGAAGTTCCCATCATCACCACC
AACAACACCTCCGTCACCAGCAAAAACAGACGAACAAAAGAAGGAAAGTAAGTTCCTTCCATTTTTAACA
AACATTGAGACCTTATACAATAACTTAGTTAATAAAATTGACGATTACTTAATTAACTTAAAGGCAAAGA
TTAACGATTGTAATGTTGAAAAAAATGAAGCACATGTTAAAATAACTAAACTTAGTGATTTAAAAGCAAT
TGATGACAAAATAGATCTTTTTAAAAACCATAACGACTTCGAAGCAATTAAAAAATTGATAAATGATGAT
ACGAAAAAAGATATGCTTGGCAAATTACTTAGTACAGGATTAGTTCAAAATTTTCCTAATACAATAATAT
CAAAATTAATTGAAGGAAAATTCCAAGATATGTTAAACATTTCACAACACCAATGCGTAAAAAAACAATG
TCCACAAAATTCTGGATGTTTCAGACATTTAGATGAAAGAGAAGAATGTAAATGTTTATTAAATTACAAA
CAAGAAGGTGATAAATGTGTTGAAAATCCAAATCCTACTTGTAACGAAAATAATGGTGGATGTGATGCAG
ATGCCAAATGTACCGAAGAAGATTCAGGTAGCAACGGAAAGAAAATCACATGTGAATGTACTAAACCTGA
TTCTTATCCATTTTTCGATGGTATTTTCTGCAGTTCCTCTAACTTCTTAGGAATATCATTCTTATTAATA
CTCATGTTAATATTATACAGTTTCATTTAA

>AB300615.1 Plasmodium falciparum msp1 gene for merozoite surface protein-1, complete cds, isolate: Sud-60-93-11
ATGAAGATCATATTCTTTTTATGTTCATTTCTTTTTTTTATTATAAATACACAATGTGTAACACATGAAA
GTTATCAAGAACTTGTCAAAAAACTAGAAGCTTTAGAAGATGCAGTATTGACAGGTTATAGTTTATTTCA
AAAGGAAAAAATGGTATTAAAGGATGGAGCAAATACTCAAGTTGTTGCAAAGCCTGCAGATGCTGTAAGT
ACTCAAAGTGCTAAAAATCCTCCAGGTGCTACAGTACCTTCAGGTACTGCAAGTACTAAAGGTGCTATAA
GATCTCCAGGTGCTGCAAATCCTTCAGATGATTCAAGTGATTCAGATGCTAAATCTTACGCTGATTTAAA
ACATAGAGTTCAAAATTACTTGTTCACTATTAAAGAACTCAAATATCCCGAACTCTTTGATTTAACCAAT
CATATGTTGACTTTATCTAAAAATGTTGATGGTTTCAAATATTTAATTGATGGATATGAAGAAATTAATG
AATTATTATATAAATTAAACTTTTATTTTGATTTATTAAGAGCAAAATTAAATGATGTATGTGCTAATGA
TTATTGTCAAATACCTTTCAATCTTAAAATTCGTGCAAATGAATTAGACGTACTTAAAAAACTTGTGTTC
GGATATAGAAAACCATTAGACAATATTAAAGATAATGTAGGAAAAATGGAAGATTACATTAAAAAAAATA
AAACAACCATAGCAAATATAAATGAATTAATTGAAGGAAGTAAGAAAACAATTGATCAAAATAAGAATGC
AGATAATGAAGAAGGAAAAAAAAAATTATACCAAGCTCAATATGATCTTTCTATTTACAATAAACAATTA
GAAGAAGCACATAATTTAATAAGCGTTTTAGAAAAACGTATTGACACTTTAAAAAAAAATGAAAACATAA
AGAAATTACTTGAAGATATAGATAAAATTAAAACAGATGCCGAAAAACTCACTACTGGAAGTAAACCAAA
TCCTCTCCCTGAGAATAAGAAAAAAGAAGTCGAGGGACACGAAGAAAAAATAAAAGAAATTGCCAAAACT
ATTAAATTTAACATTGATAGTTTATTTACTGATCCACTTGAATTAGAATATTATTTAAGAGAAAAAAATA
AAAAAGTTGATGTAACACCTAAATCACAAGATCCTACGAAATCTGTTCAAATACCAAAAGTTCCTTATCC
AAATGGTATTGTATATCCTTTACCACTCACTGATATTCATAATTCATTAGCTGCAGATAATGATAAAAAT
TCATATGGTGATTTAATGAATCCTAATACTAAAGAAAAAATTAATGAAAAAATTATTACAGATAATAAGG
AAAGAAAAATATTCATTAATAACATTAAAAAACAAATTGATTTAGAAGAAAAAAACATTAATCACACAAA
AGAACAAAATAAAAAATTACTTGAAGATTATGAAAAGTCAAAAAAGGATTATGAAGAATTACTTGAAAAA
TTTTATGAAATGAAATTTAATAATAATTTTAACAAAGATGTCGTAGATAAAATGTTCAGTGCAAGATATA
CATATAATGTTGAAAAACAAAGATATAATAATAAATTTTCATCCTCTAATAATTCTGTATATAATGTTCA
AAAATTAAAAAAGGCTCTTTCATATCTTGAAGATTATTCTTTAAGAAAAGGAATTTCTGAAAAAGATTTT
AATCATTATTATACTTTGAAAACTGGCCTCGAAGCTGATATAAAAAAATTAACAGAAGAAATAAAGAGTA
GTGAAAACAAAATTCGAGAAAAAAATTTTAAAGGACTAACACATTCAGCAAATGCTTCCTTAGAAGTATA
TGATATTGTAAAATTACAAGTACAAAAAGTTTTATTAATTAAAAAAATAGAAGACTTAAGAAAGATAGAA
TTATTTTTAAAAAATGCACAACTAAAAGATAGTATTCATGTACCAAATATTTATAAACCACAAAATAAAC
CAGAACCATATTATTTAATTGTATTAAAAAAAGAAGTAGATAAATTAAAAGAATTTATACCAAAAGTAAA
AGACATGTTAAAGAAAGAACAAGCTGTCTTATCAAGTATTACACAACCTTTAGTTGCAGCAAGCGAAACA
ACTGAAGATGGGGGTCACTCCACACACACATTATCCCAATCAGGAGAAACAGAAGTAACAGAAGAAACAG
AAGAAACAGAAGAAACAGTAGGACACACAACAACGGTAACAATAACATTACCACCAACACAACCATCACC
ACCAAAAGAAGTAAAAGTTGTTGAAAATTCAATAGAACATAAGAGTAATGACAATTCACAAGCCTTGACA
AAAACAGTTTATCTAAAGAAATTAGATGAATTTTTAACTAAATCATATATATGTCATAAATATATTTTAG
TATCAAACTCTAGTATGGACCAAAAATTATTAGAGGTATATAATCTTACTCCAGAAGAAAAAAATGAATT
AAAATCATGTGATCCATTAGATTTATTATTTAATATTCAAAATAACATACCTGCTATGTATTCATTATAT
GATAGTATGAACAATGATTTACAACATCTCTTTTTTGAATTATATCAAAAGGAAATGATTTATTATTTAC
ATAAACTAAAAGAGGAAAATCACATCAAAAAATTATTAGAGGAGCAAAAACAAATAACTGGAACATCATC
TACATCCAGTCCTGGAAATACAACCGTAAATACTGCTCAATCCGCAACTCACAGTAATTCCCAAAACCAA
CAATCAAATGCATCCTCTACCAATACCCAAAATGGTGTAGCTGTATCATCTGGTCCTGCTGTAGTTGAAG
AAAGTCATGATCCCTTAACAGTATTGTCTATTAGTAACGATTTGAAAGGTATTGTTAGTCTCTTAAATCT
TGGAAATAAAACTAAAGTACCTAATCCATTAACCATTTCTACAACAGAGATGGAAAAATTTTATGAGAAT
ATTTTAAAAAATAATGATACCTATTTTAATGATGATATCAAACAATTCGTAAAATCTAATTCAAAAGTAA
TTACAGGTTTGACCGAAACACAAAAAAATGCATTAAATGATGAAATTAAAAAATTAAAAGATACTTTACA
GTTATCATTTGATTTATATAATAAATATAAATTAAAATTAGATAGATTATTTAATAAGAAAAAAGAACTT
GGCCAAGACAAAATGCAAATTAAAAAACTTACTTTATTAAAAGAACAATTAGAATCAAAATTGAATTCAC
TTAATAACCCACATAATGTATTACAAAACTTTTCTGTTTTCTTTAACAAAAAAAAAGAAGCTGAAATAGC
AGAAACTGAAAACACATTAGAAAACACAAAAATATTATTGAAACATTATAAAGGACTTGTTAAATATTAT
AATGGTGAATCATCTCCATTAAAAACTTTAAGTGAAGTATCAATTCAAACAGAAGATAATTATGCCAATT
TAGAAAAATTTAGAGTATTAAGTAAAATAGATGGAAAACTCAATGATAATTTACATTTAGGAAAGAAAAA
ATTATCTTTCTTATCAAGTGGATTACATCATTTAATTACTGAATTAAAAGAAGTAATAAAAAATAAAAAT
TATACAGGTAATTCTCCAAGTGAAAATAATAAGAAAGTTAACGAAGCTTTAAAATCTTACGAAAATTTTC
TCCCAGAAGCAAAAGTTACAACAGTTGTAACTCCACCTCAACCAGATGTAACTCCATCTCCATTATCTGT
AAGGGTAAGTGGTAGTTCAGGATCCACAAAAGAAGAAACACAAATACCAACTTCAGGCTCTTTATTAACA
GAATTACAACAAGTAGTACAATCACAAAATTATGACGAAGAAGATGATTCCTTAGTTGTATTACCCATTT
TTGGAGAATCCGAAGATAATGACGAATATTTAGATCAAGTAGTAACTGGAGAAGCAATATCTGTCACAAT
GGATAATATCCTCTCAGGATTTGAAAATGAATATGATGTTATATATTTAAAACCTTTAGCTGGAGTATAT
AGAAGCTTAAAAAAACAAATTGAAAAAAACATTTTTACATTTAATTTAAATTTGAACGATATCTTAAATT
CACGTCTTAAGAAACGAAAATATTTCTTAGATGTATTAGAATCTGATTTAATGCAATTTAAACATATATC
CTCAAATGAATACATTATTGAAGATTCATTTAAATTATTGAATTCAGAACAAAAAAACACACTTTTAAAA
AGTTACAAATATATAAAAGAATCAGTAGAAAATGATATTAAATTTGCACAGGAAGGTATAAGTTATTATG
AAAAGGTTTTAGCGAAATATAAGGATGATTTAGAATCAATTAAAAAAGTTATCAAAGAAGAAAAGGAGTT
CCCATCATCACCACCAACAACACCTCCGTCACCAGCAAAAACAGACGAACAAAAGAAGGAAAGTAAGTTC
CTTCCATTTTTAACAAACATTGAGACCTTATACAATAACTTAGTTAATAAAATTGACGATTACTTAATTA
ACTTAAAGGCAAAGATTAACGATTGTAATGTTGAAAAAAATGAAGCACATGTTAAAATAACTAAACTTAG
TGATTTAAAAGCAATTGATGACAAAATAGATCTTTTTAAAAACCATAACGACTTCGAAGCAATTAAAAAA
TTGATAAATGATGATACGAAAAAAGATATGCTTGGCAAATTACTTAGTACAGGATTAGTTCAAAATTTTC
CTAATACAATAATATCAAAATTAATTGAAGGAAAATTCCAAGATATGTTAAACATTTCACAACACCAATG
CGTAAAAAAACAATGTCCAGAAAATTCTGGATGTTTCAGACATTTAGATGAAAGAGAAGAATGTAAATGT
TTATTAAATTACAAACAAGAAGGTGATAAATGTGTTGAAAATCCAAATCCTACTTGTAACGAAAATAATG
GTGGATGTGATGCAGATGCCAAATGTACCGAAGAAGATTCAGGTAGCAACGGAAAGAAAATCACATGTGA
ATGTACTAAACCTGATTCTTATCCACTTTTCGATGGTATTTTCTGCAGTTCCTCTAACTTCTTAGGAATA
TCATTCTTATTAATACTCATGTTAATATTATACAGTTTCATTTAA

>AB502443.1 Plasmodium falciparum msp1 gene for merozoite surface protein-1, complete cds, isolate: Tz03-002
ATGAAGATCATATTCTTTTTATGTTCATTTCTTTTTTTTATTATAAATACACAATGTGTAACACATGAAA
GTTATCAAGAACTTGTCAAAAAACTAGAAGCTTTAGAAGATGCAGTATTGACAGGTTATAGTTTATTTCA
AAAGGAAAAAATGGTATTAAAGGATGGAGCAAATACTCAAGTTGTTGCAAAGCCTGCAGATGCTGTAAGT
ACTCAAAGTGCTAAAAATCCTCCAGGTGCTACAGTACCTTCAGGTACTGCAAGTACTAATGGTGCTATAA
GATCTCCAGGTGCTGCAAATCCTTCAGATGATTCAAGTGATTCAGATGCTAAATCTTACGCTGATTTAAA
ACATAGAGTTCAAAATTACTTGTTCACTATTAAAGAACTCAAATATCCCGAACTCTTTGATTTAACCAAT
CATATGTTGACTTTATCTAAAAATGTTGATGGTTTCAAATATTTAATTGATGGATATGAAGAAATTAATG
AATTATTATATAAATTAAACTTTTATTATGATTTATTAAGAGCCAAATTAAATGATGCATGTGCCAATAG
TTATTGTCAAATACCTTTCAATCTTAAAATTCGTGCAAATGAATTAGACGTACTTAAAAAAATTGTGTTC
GGATATAGAAAACCATTAGACAATATTAAAGATAATGTAGGAAAAATGGAAGATTACATTAAAAAAAATA
AAACAACCATAGCAAATATAAATGAATTAATTGAAGGAAGTAAGAAAACAATTGATCAAAATAAGAATGC
AGATAATGAAGAAGGAAAAAAAAAATTATACCAAGCTCAATATGATCTTTTTATTTACAATAAACAATTA
CAAGAAGCACATAATTTAATAAGCGTTTTAGAAAAACGTATTGACACTTTAAAAAAAAATGAAAACATAA
AGAAATTACTTGAAGATATAGATAAAATTAAAACAGATGCCGAAAAACTCACTACTGGAAGTAAACCAAA
TACTCTCCTTGATAAGAACAAAAAAATCGAGGAACACGAAGAAAAAATAAAAGAAATTGCCAAAACTATT
AAATTTAACATTGATAGTTTATTTACTGATCCACTTGAATTAGAATATTATTTAAGAGAAAAAAATAAAA
AAGTTGATGTAACACCTAAATCACAAGATCCTACGAAATCTGTTCAAATACCAAAAGTTCCTTATCCAAA
TGGTATTGTATATCCTTTACCACTCACTGATATTCATAATTCATTAGCTGCAGATAATGATAAAAATTCA
TATGGTGATTTAATGAATCCTAATACTAAAGAAAAAATTAATGAAAAAATTATTACAGATAATAAGGAAA
GAAAAATATTCATTAATAACATTAAAAAACAAATTGATTTAGAAGAAAAAAACATTAATTACACAAAAGA
ACAAAATAAAAAATTACTTGAAGATTATGAAAAGTCAAAAAAGGATTATGAAGAATTACTTGAAAAATTT
TATGAAATGAAATTTAATAATAATTTTGACAAAGATGTCGTAGATAAAATATTCAGTGCAAGATATACAT
ATAATGTTGAAAAACAAAGATATAATAATAAATTTTCATCCTCTAATAATTCTGTATATAATGTTCAAAA
ATTAAAAAAGGCTCTTTCATATCTTGAAGATTATTCTTTAAGAAAAGGAATTTCTGAAAAAGATTTTAAT
CATTATTATACTTTGAAAACTGGCCTCGAAGCTGATATAAAAAAATTAACAGAAGAAATAAAGAGTAGTG
AAAACAAAATTCGAGAAAAAAATTTTAAAGGACTAACACATTCAGCAAATGGTTCCTTAGAAGTATCTGA
TATTGTAAAATTACAAGTACAAAAAGTTTTATTAATTAAAAAAATAGAAGACTTAAGAAAGATAGAATTA
TTTTTAAAAAATGCACAACTAAAAGATAGTATTCATGTACCAAATATTTATAAACCACAAAATAAACCAG
AACCATATTATTTAATTGTATTAAAAAAAGAAGTAGATAAATTAAAAGAATTTATACCAAAAGTAAAAGA
CATGTTAAAGAAAGAACAAGCTGTCTTATCAAGTATTACACAACCTTTAGTTGCAGCAAGCGAAACAACT
GAAGATGGGGGTCACTCCACACACACATTATCCCAATCAGGAGAAACAGAAGTAACAGAAGAAACAGAAG
AAACAGTAGGACACACAACAACGGTAACAATAACATTACCACCAAAAGAAGTAAAAGTTGTTGAAAATTC
AATAGAACATAAGAGTAATGACAATTCACAAGCCTTGACAAAAACAGTTTATCTAAAGAAATTAGATGAA
TTTTTAACTAAATCATATATATGTCATAAATATATTTTAGTATCAAACTCTAGTATGGACCAAAAATTAT
TAGAGGTATATAATCTTACTCCAGAAGAAAAAAATGAATTAAAATCATGTGATCCATTAGATTTATTATT
TAATATTCAAAATAACATACCTGCTATGTATTCATTATATGATAGTATGAACAATGATTTACAACATCTC
TTTTTTGAATTATATCAAAAGGAAATGATTTATTATTTACATAAACTAAAAGAGGAAAATCACATCAAAA
AATTATTAGAGGAGCAAAAACAAATAACTGGAACATCATCTACATCCAGTCCTGGAAATACAACCGTAAA
TACTGCTCAATCCGCAACTCACAGTAATTCCCAAAACCAACAATCAAATGCATCCTCTACCAATACCCAA
AATGGTGTAGCTGTATCATCTGGTCCTGCTGTAGTTGAAGAAAGTCATGATCCCTTAACAGTATTGTCTA
TTAGTAACGATTTGAAAGGTATTGTTAGTCTCTTAAATCTTGGAAATAAAACTAAAGTACCTAATCCATT
AACCATTTCTACAACAGAGATGGAAAAATTTTATGAGAATATTTTAAAAAATAATGATACCTATTTTAAT
GATGATATCAAACAATTCGTAAAATCTAATTCAAAAGTAATTACAGGTTTGACCGAAACACAAAAAAATG
CATTAAATGATGAAATTAAAAAATTAAAAGATACTTTACAGTTATCATTTGATTTATATAATAAATATAA
ATTAAAATTAGATAGATTATTTAATAAGAAAAAAGAACTTGGCCAAGACAAAATGCAAATTAAAAAACTT
ACTTTATTAAAAGAACAATTAGAATCAAAATTGAATTCACTTAATAACCCACATAATGTATTACAAAACT
TTTCTGTTTTCTTTAACAAAAAAAAAGAAGCTGAAATAGCAGAAACTGAAAACACATTAGAAAACACAAA
AATATTATTGAAACATTATAAAGGACTTGTTAAATATTATAATGGTGAATCATCTCCATTAAAAACTTTA
AGTGAAGTATCAATTCAAACAGAAGATAATTATGCCAATTTAGAAAAATTTAGAGTATTAAGTAAAATAG
ATGGAAAACTCAATGATAATTTACATTTAGGAAAGAAAAAATTATCTTTCTTATCAAGTGGATTACATCA
TTTAATTACTGAATTAAAAGAAGTAATAAAAAATAAAAATTATACAGGTAATTCTCCAAGTGAAAATAAT
AAGAAAGTTAACGAAGCTTTAAAATCTTACGAAAATTTTCTCCCAGAAGCAAAAGTTACAACAGTTGTAA
CTCCACCTCAACCAGATGTAACTCCATCTCCATTATCTGTAAGGGTAAGTGGTAGTTCAGGATCCACAAA
AGAAGAAACACAAATACCAACTTCAGGCTCTTTATTAACAGAATTACAACAAGTAGTACAATCACAAAAT
TATGACGAAGAAGATGATTCCTTAGTTGTATTACCCATTTTTGGAGAATCCGAAGATAATGACGAATATT
TAGATCAAGTAGTAACTGGAGAAGCAATATCTGTCACAATGGATAATATCCTCTCAGGATTTGAAAATGA
ATATGATGTTATATATTTAAAACCTTTAGCTGGAGTATATAGAAGCTTAAAAAAACAAATTGAAAAAAAC
ATTTTTACATTTAATTTAAATTTGAACGATATCTTAAATTCACGTCTTAAGAAACGAAAATATTTCTTAG
ATGTATTAGAATCTGATTTAATGCAATTTAAACATATATCCTCAAATGAATACATTATTGAAGATTCATT
TAAATTATTGAATTCAGAACAAAAAAACACACTTTTAAAAAGTTACAAATATATAAAAGAATCAGTAGAA
AATGATATTAAATTTGCACAGGAAGGTATAAGTTATTATGAAAAGGTTTTAGCGAAATATAAGGATGATT
TAGAATCAATTAAAAAAGTTATCAAAGAAGAAAAGGAGTTCCCATCATCACCACCAACAACACCTCCGTC
ACCAGCAAAAACAGACGAACAAAAGAAGGAAAGTAAGTTCCTTCCATTTTTAACAAACATTGAGACCTTA
TACAATAACTTAGTTAATAAAATTGACGATTACTTAATTAACTTAAAGGCAAAGATTAACGATTGTAATG
TTGAAAAAGATGAAGCACATGTTAAAATAACTAAACTTAGTGATTTAAAAGCAATTGATGACAAAATAGA
TCTTTTTAAAAACCATAACGACTTCGAAGCAATTAAAAAATTGATAAATGATGATACGAAAAAAGATATG
CTTAGCAAATTACTTAGTACAGGATTAGTTCAAAATTTTCCTAATACAATAATATCAAAATTAATTGAAG
GAAAATTCCAAGATATGTTAAACATTTCACAACACCAATGCGTAAAAAAACAATGTCCACAAAATTCTGG
ATGTTTCAGACATTTAGATGAAAGAGAAGAATGTAAATGTTTATTAAATTACAAACAAGAAGGTGATAAA
TGTGTTGAAAATCCAAATCCTACTTGTAACGAAAATAATGGTGGATGTGATGCAGATGCCAAATGTACCG
AAGAAGATTCAGGTAGCAACGGAAAGAAAATCACATGTGAATGTACTAAACCTGATTCTTATCCACTTTT
CGATGGTATTTTCTGCAGTTCCTCTAACTTCTTAGGAATATCATTCTTATTAATACTCATGTTAATATTA
TACAGTTTCATTTAA

>AB502444.1 Plasmodium falciparum msp1 gene for merozoite surface protein-1, complete cds, isolate: Tz03-025
ATGAAGATCATATTCTTTTTATGTTCATTTCTTTTTTTTATTATAAATACACAATGTGTAACACATGAAA
GTTATCAAGAACTTGTCAAAAAACTAGAAGCTTTAGAAGATGCAGTATTGACAGGTTATAGTTTATTTCA
AAAGGAAAAAATGGTATTAAATGAAGAAGAAATTACTACAAAAGGTGCAAGTGCTCAAAGTGGTGCAAGT
GCTCAAAGTGGTGCAAGTGCTCAAAGTGGTGCAAGTGCTCAAAGTGGTGCAAGTGCTCAAAGTGGTACAA
GTGGTCCAAGTGGTCCAAGTGGTACAAGTCCATCATCTCGTTCAAACACTTTACCTCGTTCAAATACTTC
ATCTGGTGCAAGCCCTCCAGCTGATGCAAGCGATTCAGATGCTAAATCTTACGCTGATTTAAAACACAGA
GTACGAAATTACTTGTTCACTATTAAAGAACTCAAATATCCCGAACTCTTTGATTTAACCAATCATATGT
TAACTTTGTGTGATAATATTCATGGTTTCAAATATTTAATTGATGGATATGAAGAAATTAATGAATTATT
ATATAAATTAAACTTTTATTATGATTTATTAAGAGCAAAATTAAATGATGTATGTGCTAATGATTATTGT
CAAATACCTTTCAATCTTAAAATTCGTGCAAATGAATTAGACGTACTTAAAAAACTTGTGTTCGGATATA
GAAAACCATTAGACAATATTAAAGATAATGTAGGAAAAATGGAAGATTACATTAAAAAAAATAAAACAAC
CATAGCAAATATAAATGAATTAATTGAAGGAAGTAAGAAAACAATTGATCAAAATAAGAATGCAGATAAT
GAAGAAGGAAAAAAAAAATTATACCAAGCTCAATATGATCTTTCTATTTACAATAAACAATTAGAAGAAG
CACATAATTTAATAAGCGTTTTAGAAAAACGTATTGACACTTTAAAAAAAAATGAAAACATAAAGAAATT
ACTTGAAGATATAGATAAAATTAAAACAGATGCCGAAAAACCCACTACTGGAAGTAAACCAAATACTCTC
CTTGATAAGAACAAAAAAATCGAGGAACACGAAGAAAAAATAAAAGAAATTGCCAAAACTATTAAATTTA
ACATTGATAGTTTATTTACTGATCCACTTGAATTAGAATATTATTTAAGAGAAAAAAATAAAAAAGTTGA
TGTAACACCTAAATCACAAGATCCTACGAAATCTGTTCAAATACCAAAAGTTCCTTATCCAAATGGTATT
GTATATCCTTTACCACTCACTGATATTCATAATTCATTAGCTGCAGATAATGATAAAAATTCATATGGTG
ATTTAATGAATCCTGATACTAAAGAAAAAATTAATGAAAAAATTATTACAGATAATAAGGAAAGAAAAAT
ATTCATTAATAACATTAAAAAACAAATTGATTTAGAAGAAAACAACATTAATCACACAAAAGAACAAAAT
AAAAAATTACTTGAAGATTATGAAAAGTCAAAAAAGGATTATGAAGAATTACTTGAAAAATTTTATGAAA
TGAAATTTAATAATAATTTTGACAAAGATGTCGTAGATAAAATATTCAGTGCAAGATATACATATAATGT
TGAAAAACAAAGATATAATAATAAATTTTCATCCTCTAATAATTCTGTATATAATGTTCAAAAATTAAAA
AAGGCTCTTTCATATCTTGAAGATTATTCTTTAAGAAAAGGAATTTCTGAAAAAGATTTTAATCATTATT
ATACTTTGAAAACTGGCCTCGAAGCTGATATAAAAAAATTAACAGAAGAAATAAAGAGTAGTGAAAACAA
AATTCTAGAAAAAAATTTTAAAGGACTAACACATTCAGCAAATGCTTCCTTAGAAGTATATGATATTGTA
AAATTACAAGTACAAAAAGTTTTATTAATTAAAAAAATAGAAGACTTAAGAAAGATAGAATTATTTTTAA
AAAATGCACAACTAAAAGATAGTATTCATGTACCAAATATTTATAAACCACAAAATAAACCAGAACCATA
TTATTTAATTGTATTAAAAAAAGAAGTAGATAAATTAAAAGAATTTATACCAAAAGTAAAAGACATGTTA
AAGAAAGAACAAGCTGTCTTATCAAGTATTACACAACCTTTAGTTGCAGCAAGCGAAACAACTGAAGATG
GGGGTCACTCCACACACACATTATCCCAATCAGGAGAAACAGAAGTAACAGAAGAAACAGAAGAAACAGA
AGAAACAGTAGGACACACAACAACGGTAACAATAACATTACCACCAACACAACCATCACCACCAAAAGAA
GTAAAAGTTGTTGAAAATTCAATAGAACATAAGAGTAATGACAATTCACAAGCCTTGACAAAAACAGTTT
ATCTAAAGAAATTAGATGAATTTTTAACTAAATCATATATATGTCATAAATATATTTTAGTATCAAACTC
TAGTATGGACCAAAAATTATTAGAGGTATATAATCTTACTCCAGAAGAAAAAAATGAATTAAAATCATGT
GATCCATTAGATTTATTATTTAATATTCAAAATAACATACCTGCTATGTATTCATTATATGATAGTATGA
ACAATGATTTACAACATCTCTTTTTTGAATTATATCAAAAGGAAATGATTTATTATTTACATAAACTAAA
AGAGGAAAATCACATCAAAAAATTATTAGAGGAGCAAAAACAAATAACTGGAACATCATCTACATCCAGT
CCTGGAAATACAACCGTAAATACTGCTCAATCCGCAACTCACAGTAATTCCCAAAACCAACAATCAAATG
CATCCTCTACCAATACCCAAAATGGTGTAGCTGTATCATCTGGTCCTGCTGTAGTTGAAGAAAGTCATGA
TCCCTTAACAGTATTGTCTATTAGTAACGATTTGAAAGGTATTGTTAGTCTCTTAAATCTTGGAAATAAA
ACTAAAGTACCTAATCCATTAACCATTTCTACAACAGAGATGGAAAAATTTTATGAGAATATTTTAAAAA
ATAATGATACCTATTTTAATGATGATATCAAACAATTCGTAAAATCTAATTCAAAAGTAATTACAGGTTT
GACCGAAACACAAAAAAATGCATTAAATGATGAAATTAAAAAATTAAAAGATACTTTACAGTTATCATTT
GATTTATATAATAAATATAAATTAAAATTAGATAGATTATTTAATAAGAAAAAAGAACTTGGCCAAGACA
AAATGCAAATTAAAAAACTTACTTTATTAAAAGAACAATTAGAATCAAAATTGAATTCACTTAATAACCC
ACATAATGTATTACAAAACTTTTCTGTTTTCTTTAACAAAAAAAAAGAAGCTGAAATAGCAGAAACTGAA
AACACATTAGAAAACACAAAAATATTATTGAAACATTATAAAGGACTTGTTAAATATTATAATGGTGAAT
CATCTCCATTAAAAACTTTAAGTGAAGTATCAATTCAAACAGAAGATAATTATGCCAATTTAGAAAAATT
TAGAGTATTAAGTAAAATAGATGGAAAACTCAATGATAATTTACATTTAGGAAAGAAAAAATTATCTTTC
TTATCAAGTGGATTACATCATTTAATTACTGAATTAAAAGAAGTAATAAAAAATAAAAATTATACAGGTA
ATTCTCCAAGTGAAAATAATAAGAAAGTTAACGAAGCTTTAAAATCTTACGAAAATTTTCTCCCAGAAGC
AAAAGTTACAACAGTTGTAACTCCACCTCAACCAGATGTAACTCCATCTCCATTATCTGTAAGGGTAAGT
GGTAGTTCAGGATCCACAAAAGAAGAAACACAAATACCAACTTCAGGCTCTTTATTAACAGAATTACAAC
AAGTAGTACAATTACAAAATTATGACGAAGAAGATGATTCCTTAGTTGTATTACCCATTTTTGGAGAATC
CGAAGATAATGACGAATATTTAGATCAAGTAGTAACTGGAGAAGCAATATCTGTCACAATGGATAATATC
CTCTCAGGATTTGAAAATGAATATGATGTTATATATTTAAAACCTTTAGCTGGAGTATATAGAAGCTTAA
AAAAACAAATTGAAAAAAACATTTTTACATTTAATTTAAATTTGAACGATATCTTAAATTCACGTCTTAA
GAAACGAAAATATTTCTTAGATGTATTAGAATCTGATTTAATGCAATTTAAACATATATCCTCAAATGAA
TACATTATTGAAGATTCATTTAAATTATTGAATTCAGAACAAAAAAACACACTTTTAAAAAGTTACAAAT
ATATAAAAGAATCAGTAGAAAATGATATTAAATTTGCACAGGAAGGTATAAGTTATTATGAAAAGGTTTT
AGCGAAATATAAGGATGATTTAGAATCAATTAAAAAAGTTATCAAAGAAGAAAAGGAGTTCCCATCATCA
CCACCAACAACACCTCCGTCACCAGCAAAAACAGACGAACAAAAGAAGGAAAGTAAGTTCCTTCCATTTT
TAACAAACATTGAGACCTTATACAATAACTTAGTTAATAAAATTGACGATTACTTAATTAACTTAAAGGC
AAAGATTAACGATTGTAATGTTGAAAAAGATGAAGCACATGTTAAAATAACTAAACTTAGTGATTTAAAA
GCAATTGATGACAAAATAGATCTTTTTAAAAACCATAACGACTTCGAAGCAATTAAAAAATTGATAAATG
ATGATACGAAAAAAGATATGCTTGGCAAATTACTTAGTACAGGATTAGTTCAAAATTTTCCTAATACAAT
AATATCAAAATTAATTGAAGGAAAATTCCAAGATATGTTAAACATTTCACAACACCAATGCGTAAAAAAA
CAATGTCCACAAAATTCTGGATGTTTCAGACATTTAGATGAAAGAGAAGAATGTAAATGTTTATTAAATT
ACAAACAAGAAGGTGATAAATGTGTTGAAAATCCAAATCCTACTTGTAACGAAAATAATGGTGGATGTGA
TGCAGATGCCAAATGTACCGAAGAAGATTCAGGTAGCAACGGAAAGAAAATCACATGTGAATGTACTAAA
CCTGATTCTTATCCACTTTTCGATGGTATTTTCTGCAGTTCCTCTAACTTCTTAGGAATATCATTCTTAT
TAATACTCATGTTAATATTATACAGTTTCATTTAA

>AB502445.1 Plasmodium falciparum msp1 gene for merozoite surface protein-1, complete cds, isolate: Tz03-032
ATGAAGATCATATTCTTTTTATGTTCATTTCTTTTTTTTATTATAAATACACAATGTGTAACACATGAAA
GTTATCAAGAACTTGTCAAAAAACTAGAAGCTTTAGAAGATGCAGTATTGACAGGTTATAGTTTATTTCA
AAAGGAAAAAATGGTATTAAATGAAGAAGAAATTACTACAAAAGGTGCAAGTGCTCAAAGTGGTACAAGT
GGTACAAGTGGTACAAGTGGTACAAGTGGTACAAGTGGTACAAGTGGTACAAGTGGTACAAGTGGTACAA
GTGGTACAAGTGGTACAAGTGGTACAAGTGGTCCAAGTGGTACAAGTCCATCATCTCGTTCAAACACTTT
ACCTCGTTCAAATACTTCATCTGGTGCAAGCCCTCCAGCTGATGCAAGCGATTCAGATGCTAAATCTTAC
GCTGATTTAAAACACAGAGTACGAAATTACTTGTTCACTATTAAAGAACTCAAATATCCCGAACTCTTTG
ATTTAACCAATCATATGTTAACTTTGTGTGATAATATTCATGGTTTCAAATATTTAATTGATGGATATGA
AGAAATTAATGAATTATTATATAAATTAAACTTTTATTTTGATTTATTAAGAGCAAAATTAAATGATGTA
TGTGCTAATGATTATTGTCAAATACCTTTCAATCTTAAAATTCGTGCAAATGAATTAGACGTACTTAAAA
AACTTGTGTTCGGATATAGAAAACCATTAGACAATATTAAAGATAATGTAGGAAAAATGGAAGATTACAT
TAAAAAAAATAAAACAACCATAGCAAATATAAATGAATTAATTGAAGGAAGTAAGAAAACAATTGATCAA
AATAAGAATGCAACTAAAGAAGAAGAAAAAAAAAAATTATACCAAGCTCAATATGATCTTTCTATTTACA
ATAAACAATTAGAAGAAGCACATAATTTAATAAGCGTTTTAGAAAAACGTATTGACACTTTAAAAAAAAA
TGAAAACATAAAGAAATTACTTGAAGATATAGATAAAATTAAAACAGATGCCGAAAAACCCACTACTGAA
AGTAAACCAAATACTCTCCTTGATAAGAACAAAAAAATCGAGGAACACGAAGAAAAAATAAAAGAAATTG
CCAAAACTATTAAATTTAACATTGATAGTTTATTTACTGATCCACTTGAATTAGAATATTATTTAAGAGA
AAAAAATAAAAAAGTTGATGTAACACCTAAATCACAAGATCCTACGAAATCTGTTCAAATACCAAAAGTT
CCTTATCCAAATGGTATTGTATATCCTTTACCACTCACTGATATTCATAATTCATTAGCTGCAGATAATG
ATAAAAATTCATATGGTGATTTAATGAATCCTGATACTAAAGAAAAAATTAATGAAAAAATTATTACAGA
TAATAAGGAAAGAAAAATATTCATTAATAACATTAAAAAACAAATTGATTTAGAAGAAAAAAAAATTAAT
CACACAAAAGAACAAAATAAAAAATTACTTGAAGATTATGAAAAGTCAAAAAAGGATTATGAAGAATTAC
TTGAAAAATTTTATGAAATGAAATTTAATAATAATTTTAACAAAGATGTCGTAGATAAAATGTTCAGTGC
AAGATATACATATAATGTTGAAAAACAAAGATATAATAATAAATTTTCATCCTCTAATAATTCTGTATAT
AATGTTCAAAAATTAAAAAAGGCTCTTTCATATCTTGAAGATTATTCTTTAAGAAAAGGAATTTCTGAAA
AAGATTTTAATCATTATTATACTTTGAAAACTGGCCTCGAAGCTGATATAAAAAAATTAACAGAAGAAAT
AAAGAGTAGTGAAAACAAAATTCTAGAAAAAAATTTTAAAGGACTAACACATTCAGCAAATGCTTCCTTA
GAAGTATCTGATATTGTAAAATTACAAGTACAAAAAGTTTTATTAATTAAAAAAATAGAAGACTTAAGAA
AGATAGAATTATTTTTAAAAAATGCACAACTAAAAGATAGTATTCATGTACCAAATATTTATAAACCACA
AAATAAACCAGAACCATATTATTTAATTGTATTAAAAAAAGAAGTAGATAAATTAAAAGAATTTATACCA
AAAGTAAAAGACATGTTAAAGAAAGAACAAGCTGTCTTATCAAGTATTACACAACCTTTAGTTGCAGCAA
GCGAAACAACTGAAGATGGGGGTCACTCCACACACACATTATCCCAATCAGGAGAAACAGAAGTAACAGA
AGAAACAGAAGAAACAGAAGAAACAGTAGGACACACAACAACGGTAACAATAACATTACCACCAACACAA
CCATCACCACCAAAAGAAGTAAAAGTTGTTGAAAATTCAATAGAACATAAGAGTAATGACAATTCACAAG
CCTTGACAAAAACAGTTTATCTAAAGAAATTAGATGAATTTTTAACTAAATCATATATATGTCATAAATA
TATTTTAGTATCAAACTCTAGTATGGACCAAAAATTATTAGAGGTATATAATCTTACTCCAGAAGAAAAA
AATGAATTAAAATCATGTGATCCATTAGATTTATTATTTAATATTCAAAATAACATACCTGCTATGTATT
CATTATATGATAGTATGAACAATGATTTACAACATCTCTTTTTTGAATTATATCAAAAGGAAATGATTTA
TTATTTACATAAACTAAAAGAGGAAAATCACATCAAAAAATTATTAGAGGAGCAAAAACAAATAACTGGA
ACATCATCTACATCCAGTCCTGGAAATACAACCGTAAATACTGCTCAATCCGCAACTCACAGTAATTCCC
AAAACCAACAATCAAATGCATCCTCTACCAATACCCAAAATGGTGTAGCTGTATCATCTGGTCCTGCTGT
AGTTGAAGAAAGTCATGATCCCTTAACAGTATTGTCTATTAGTAACGATTTGAAAGGTATTGTTAGTCTC
TTAAATCTTGGAAATAAAACTAAAGTACCTAATCCATTAACCATTTCTACAACAGAGATGGAAAAATTTT
ATGAGAATATTTTAAAAAATAATGATACCTATTTTAATGATGATATCAAACAATTCGTAAAATCTAATTC
AAAAGTAATTACAGGTTTGACCGAAACACAAAAAAATGCATTAAATGATGAAATTAAAAAATTAAAAGAT
ACTTTACAGTTATCATTTGATTTATATAATAAATATAAATTAAAATTAGATAGATTATTTAATAAGAAAA
AAGAACTTGGCCAAGACAAAATGCAAATTAAAAAACTTACTTTATTAAAAGAACAATTAGAATCAAAATT
GAATTCACTTAATAACCCACATAATGTATTACAAAACTTTTCTGTTTTCTTTAACAAAAAAAAAGAAGCT
GAAATAGCAGAAACTGAAAACACATTAGAAAACACAAAAATATTATTGAAACATTATAAAGGACTTGTTA
AATATTATAATGGTGAATCATCTCCATTAAAAACTTTAAGTGAAGTATCAATTCAAACAGAAGATAATTA
TGCCAATTTAGAAAAATTTAGAGTATTAAGTAAAATAGATGGAAAACTCAATGATAATTTACATTTAGGA
AAGAAAAAATTATCTTTCTTATCAAGTGGATTACATCATTTAATTACTGAATTAAAAGAAGTAATAAAAA
ATAAAAATTATACAGGTAATTCTCCAAGTGAAAATAATAAGAAAGTTAACGAAGCTTTAAAATCTTACGA
AAATTTTCTCCCAGAAGCAAAAGTTACAACAGTTGTAACTCCACCTCAACCAGATGTAACTCCATCTCCA
TTATCTGTAAGGGTAAGTGGTAGTTCAGGATCCACAAAAGAAGAAACACAAATACCAACTTCAGGCTCTT
TATTAACAGAATTACAACAAGTAGTACAATCACAAAATTATGACGAAGAAGATGATTCCTTAGTTGTATT
ACCCATTTTTGGAGAATCCGAAGATAATGACGAATATTTAGATCAAGTAGTAACTGGAGAAGCAATATCT
GTCACAATGGATAATATCCTCTCAGGATTTGAAAATGAATATGATGTTATATATTTAAAACCTTTAGCTG
GAGTATATAGAAGCTTAAAAAAACAAATTGAAAAAAACATTTTTACATTTAATTTAAATTTGAACGATAT
CTTAAATTCACGTCTTAAGAAACGAAAATATTTCTTAGATGTATTAGAATCTGATTTAATGCAATTTAAA
CATATATCCTCAAATGAATACATTATTGAAGATTCATTTAAATTATTGAATTCAGAACAAAAAAACACAC
TTTTAAAAAGTTACAAATATATAAAAGAATCAGTAGAAAATGATATTAAATTTGCACAGGAAGGTATAAG
TTATTATGAAAAGGTTTTAGCGAAATATAAGGATGATTTAGAATCAATTAAAAAAGTTATCAAAGAAGAA
AAGGAGTTCCCATCATCACCACCAACAACACCTCCGTCACCAGCAAAAACAGACGAACAAAAGAAGGAAA
GTAAGTTCCTTCCATTTTTAACAAACATTGAGACCTTATACAATAACTTAGTTAATAAAATTGACGATTA
CTTAATTAACTTAAAGGCAAAGATTAACGATTGTAATGTTGAAAAAGATGAAGCACATGTTAAAATAACT
AAACTTAGTGATTTAAAAGCAATTGATGACAAAATAGATCTTTTTAAAAACACTGACGACTTCGAAGCAA
TTAAAAAATTGATAAATGATGATACGAAAAAAGATATGCTTGGCAAATTACTTAGTACAGGATTAGTTCA
AAATTTTCCTAATACAATAATATCAAAATTAATTGAAGGAAAATTCCAAGATATGTTAAACATTTCACAA
CACCAATGCGTAAAAAAACAATGTCCACAAAATTCTGGATGTTTCAGACATTTAGATGAAAGAGAAGAAT
GTAAATGTTTATTAAATTACAAACAAGAAGGTGATAAATGTGTTGAAAATCCAAATCCTACTTGTAACGA
AAATAATGGTGGATGTGATGCAGATGCCAAATGTACCGAAGAAGATTCAGGTAGCAACGGAAAGAAAATC
ACATGTGAATGTACTAAACCTGATTCTTATCCATTTTTCGATGGTATTTTCTGCAGTTCCTCTAACTTCT
TAGGAATATCATTCTTATTAATACTCATGTTAATATTATACAGTTTCATTTAA

>AB502446.1 Plasmodium falciparum msp1 gene for merozoite surface protein-1, complete cds, isolate: Tz03-033
ATGAAGATCATATTCTTTTTATGTTCATTTCTTTTTTTTATTATAAATACACAATGTGTAACACATGAAA
GTTATCAAGAACTTGTCAAAAAACTAGAAGCTTTAGAAGATGCAGTATTGACAGGTTATAGTTTATTTCA
AAAGGAAAAAATGGTATTAAAGGATGGAGCAAATACTCAAGTTGTTGCAAAGCCTGCAGATGCTGTAAGT
ACTCAAAGTGCTAAAAATCCTCCAGGTGCTACAGTACCTTCAGGTACTGCAAGTACTAAAGGTGCTATAA
GATCTCCAGATGCTGCAAATCCTTCAGATGATTCAAGTGATTCAGATGCTAAATCTTACGCTGATTTAAA
ACATAGAGTTCAAAATTACTTGTTCACTATTAAAGAACTCAAATATCCCGAACTCTTTGATTTAACCAAT
CATATGTTAACTTTGTGTGATAATATTCATGGTTTCAAATATTTAATTGATGGATATGAAGAAATTAATG
AATTATTATATAAATTAAACTTTTATTTTGATTTATTAAGAGCAAAATTAAATGATGTATGTGCTAATGA
TTATTGTCAAATACCTTTCAATCTTAAAATTCGTGCAAATGAATTAGACGTACTTAAAAAACTTGTGTTC
GGATATAGAAAACCATTAGACAATATTAAAGATAATGTAGGAAAAATGGAAGATTACATTAAAAAAAATA
AAACAACCATAGCAAATATAAATGAATTAATTGAAGGAAGTAAGAAAACAATTGATCAAAATAAGAATGC
AGATAATGAAGAAGGAAAAAAAAAATTATACCAAGCTCAATATGATCTTTCTATTTACAATAAACAATTA
GAAGAAGCACATAATTTAATAAGCGTTTTAGAAAAACGTATTGACACTTTAAAAAAAAATGAAAACATAA
AGAAATTACTTGAAGATATAGATAAAATTAAAACAGATGCCGAAAAACCCACTACTGGAAGTAAACCAAA
TACTCTCCTTGATAAGAACAAAAAAATCGAGGAACACGAAGAAAAAATAAAAGAAATTGCCAAAACTATT
AAATTTAACATTGATAGTTTATTTACTGATCCACTTGAATTAGAATATTATTTAAGAGAAAAAAATAAAA
AAGTTGATGTAACACCTAAATCACAAGATCCTACGAAATCTGTTCAAATACCAAAAGTTCCTTATCCAAA
TGGTATTGTATATCCTTTACCACTCACTGATATTCATAATTCATTAGCTGCAGATAATGATAAAAATTCA
TATGGTGATTTAATGAATCCTGATACTAAAGAAAAAATTAATGAAAAAATTATTACAGATAATAAGGAAA
GAAAAATATTCATTAATAACATTAAAAAACAAATTGATTTAGAAGAAAAAAACATTAATCACACAAAAGA
ACAAAATAAAAAATTACTTGAAGATTATGAAAAGTCAAAAAAGGATTATGAAGAATTACTTGAAAAATTT
TATGAAATGAAATTTAATAATAATTTTGACAAAGATGTCGTAGATAAAATGTTCAGTGCAAGATATACAT
ATAATGTTGAAAAACAAAGATATAATAATAAATTTTCATCCTCTAATAATTCTGTATATAATGTTCAAAA
ATTAAAAAAGGCTCTTTCATATCTTGAAGATTATTCTTTAAGAAAAGGAATTTCTGAAAAAGATTTTAAT
CATTATTATACTTTGAAAACTGGCCTCGAAGCTGATATAAAAAAATTAACAGAAGAAATAAAGAGTAGTG
AAAACAAAATTCTAGAAAAAAATTTTAAAGGACTAACACATTCAGCAAATGCTTCCTTAGAAGTATATGA
TATTGTAAAATTACAAGTACAAAAAGTTTTATTAATTAAAAAAATAGAAGACTTAAGAAAGATAGAATTA
TTTTTAAAAAATGCACAACTAAAAGATAGTATTCATGTACCAAATATTTATAAACCACAAAATAAACCAG
AACCATATTATTTAATTGTATTAAAAAAAGAAGTAGATAAATTAAAAGAATTTATACCAAAAGTAAAAGA
CATGTTAAAGAAAGAACAAGCTGTCTTATCAAGTATTACACAACCTTTAGTTGCAGCAAGCGAAACAACT
GAAGATGGGGGTCACTCCACACACACATTATCCCAATCAGGAGAAACAGAAGTAACAGAAGAAACAGAAG
TAACAGAAGAAACAGTAGGACACACAACAACGGTAACAATAACATTACCACCAACACAACCATCACCACC
AAAAGAAGTAAAAGTTGTTGAAAATTCAATAGAACATAAGAGTAATGACAATTCACAAGCCTTGACAAAA
ACAGTTTATCTAAAGAAATTAGATGAATTTTTAACTAAATCATATATATGTCATAAATATATTTTAGTAT
CAAACTCTAGTATGGACCAAAAATTATTAGAGGTATATAATCTTACTCCAGAAGAAGAAAATGAATTAAA
ATCATGTGATCCATTAGATTTATTATTTAATATTCAAAATAACATACCTGCTATGTATTCATTATATGAT
AGTATGAACAATGATTTACAACATCTCTTTTTTGAATTATATCAAAAGGAAATGATTTATTATTTACATA
AACTAAAAGAGGAAAATCACATCAAAAAATTATTAGAGGAGCAAAAACAAATAACTGGAACATCATCTAC
ATCCAGTCCTGGAAATACAACCGTAAATACTGCTCAATCCGCAACTCACAGTAATTCCCAAAACCAACAA
TCAAATGCATCCTCTACCAATACCCAAAATGGTGTAGCTGTATCATCTGGTCCTGCTGTAGTTGAAGAAA
GTCATAATCCCTTAACAGTATTGTCTATTAGTAACGATTTGAAAGGTATTGTTAGTCTCTTAAATCTTGG
AAATAAAACTAAAGTACCTAATCCATTAACCATTTCTACAACAGAGATGGAAAAATTTTATGAGAATATT
TTAAAAAATAATGATACCTATTTTAATGATGATATCAAACAATTCGTAAAATCTAATTCAAAAGTAATTA
CAGGTTTGACCGAAACACAAAAAAATGCATTAAATGATGAAATTAAAAAATTAAAAGATACTTTACAGTT
ATCATTTGATTTATATAATAAATATAAATTAAAATTAGATAGATTATTTAATAAGAAAAAAGAACTTGGC
CAAGACAAAATGCAAATTAAAAAACTTACTTTATTAAAAGAACAATTAGAATCAAAATTGAATTCACTTA
ATAACCCACATAATGTATTACAAAACTTTTCTGTTTTCTTTAACAAAAAAAAAGAAGCTGAAATAGCAGA
AACTGAAAACACATTAGAAAACACAAAAATATTATTGAAACATTATAAAGGACTTGTTAAATATTATAAT
GGTGAATCATCTCCATTAAAAACTTTAAGTGAAGTATCAATTCAAACAGAAGATAATTATGCCAATTTAG
AAAAATTTAGAGTATTAAGTAAAATAGATGGAAAACTCAATGATAATTTACATTTAGGAAAGAAAAAATT
ATCTTTCTTATCAAGTGGATTACATCATTTAATTACTGAATTAAAAGAAGTAATAAAAAATAAAAATTAT
ACAGGTAATTCTCCAAGTGAAAATAATAAGAAAGTTAACGAAGCTTTAAAATCTTACGAAAATTTTCTCC
CAGAAGCAAAAGTTACAACAGTTGTAACTCCACCTCAACCAGATGTAACTCCATCTCCATTATCTGTAAG
GGTAAGTGGTAGTTCAGGATCCACAAAAGAAGAAACACAAATACCAACTTCAGGCTCTTTATTAACAGAA
TTACAACAAGTAGTACAATCACAAAATTATGACGAAGAAGATGATTCCTTAGTTGTATTACCCATTTTTG
GAGAATCCGAAGATAATGACGAATATTTAGATCAAGTAGTAACTGGAGAAGCAATATCTGTCACAATGGA
TAATATCCTCTCAGGATTTGAAAATGAATATGATGTTATATATTTAAAACCTTTAGCTGGAGTATATAGA
AGCTTAAAAAAACAAATTGAAAAAAACATTTTTACATTTAATTTAAATTTGAACGATATCTTAAATTCAC
GTCTTAAGAAACGAAAATATTTCTTAGATGTATTAGAATCTGATTTAATGCAATTTAAACATATATCCTC
AAATGAATACATTATTGAAGATTCATTTAAATTATTGAATTCAGAACAAAAAAACACACTTTTAAAAAGT
TACAAATATATAAAAGAATCAGTAGAAAATGATATTAAATTTGCACAGGAAGGTATAAGTTATTATGAAA
AGGTTTTAGCGAAATATAAGGATGATTTAGAATCAATTAAAAAAGTTATCAAAGAAGAAAAGGAGTTCCC
ATCATCACCACCAACAACACCTCCGTCACCAGCAAAAACAGACGAACAAAAGAAGGAAAGTAAGTTCCTT
CCATTTTTAACAAACATTGAGACCTTATACAATAACTTAGTTAATAAAATTGACCATTACTTAATTAACT
TAAAGGCAAAGATTAACGATTGTAATGTTGAAAAAGATGAAGCACATGTTAAAATAACTAAACTTAGTGA
TTTAAAAGCAATTGATGACAAAATAGATCTTTTTAAAAACCATAACGACTTCGAAGCAATTAAAAAATTG
ATAAATGATGATACGAAAAAAGATATGCTTGGCAAATTACTTAGTACAGGATTAGTTCAAAATTTTCCTA
ATACAATAATATCAAAATTAATTGAAGGAAAATTCCAAGATATGTTAAACATTTCACAACACCAATGCGT
AAAAAAACAATGTCCACAAAATTCTGGATGTTTCAGACATTTAGATGAAAGAGAAGAATGTAAATGTTTA
TTAAATTACAAACAAGAAGGTGATAAATGTGTTGAAAATCCAAATCCTACTTGTAACGAAAATAATGGTG
GATGTGATGCAGATGCCAAATGTACCGAAGAAGATTCAGGTAACAACGGAAAGAAAATCACATGTGAATG
TACTAAACCTGATTCTTATCCACTTTTCGATGGTATTTTCTGCAGTTCCTCTAACTTCTTAGGAATATCA
TTCTTATTAATACTCATGTTAATATTATACAGTTTCATTTAA

>AB502447.1 Plasmodium falciparum msp1 gene for merozoite surface protein-1, complete cds, isolate: Tz03-038
ATGAAGATCATATTCTTTTTATGTTCATTTCTTTTTTTTATTATAAATACACAATGTGTAACACATGAAA
GTTATCAAGAACTTGTCAAAAAACTAGAAGCTTTAGAAGATGCAGTATTGACAGGTTATGGTTTATTTCA
TAAGGAAAAAATGATCTTAAATGAAGAAGAAATTACTACAAAAGGTGCAAGTGCTCAAAGTGGTACAAGT
GGTACAAGTGGTACAAGTGGTACAAGTGGTACAAGTGGTACAAGTGCTCAAAGTGGTACAAGTGGTACAA
GTGGTACAAGTGGTACAAGTGGTACAAGTGGTCCAAGTGGTACAAGTCCATCATCTCGTTCAAACACTTT
ACCTCGTTCAAATACTTCATCTGGTGCAAGCCCTCCAGCTGATGCAAGCGATTCAGATGCTAAATCTTAC
GCTGATTTAAAACACAGAGTACGAAATTACTTGTTCACTATTAAAGAACTCAAATATCCCGAACTCTTTG
ATTTAACCAATCATATGTTAACTTTGTGTGATAATATTCATGGTTTCAAATATTTAATTGATGGATATGA
AGAAATTAATGAATTATTATATAAATTAAACTTTTATTTTGATTTATTAAGAGCAAAATTAAATGATGTA
TGTGCTAATGATTATTGTCAAATACCTTTCAATCTTAAAATTCGTGCAAATGAATTAGACGTACTTAAAA
AACTTGTGTTCGGATATAGAAAACCATTAGACAATATTAAAGATAATGTAGGAAAAATGGAAGATTACAT
TAAAAAAAATAAAACAACCATAGCAAATATAAATGAATTAATTGAAGGAAGTAAGAAAACAATTGATCAA
AATAAGAATGCAGATAATGAAGAAGGAAAAAAAAAATTATACCAAGCTCAATATGATCTTTCTATTTACA
ATAAACAATTACAAGAAGCACATAATTTAATAAGCGTTTTAGAAAAACGTATTGACACTTTAAAAAAAAA
TGAAAACATAAAGAAATTACTTGAAGATATAGATAAAATTAAAACAGATGCCGAAAAACCCACTACTGGA
AGTAAACCAAATACTCTCCTTGATAAGAACAAAAAAATCGAGGAACACGAAGAAAAAATAAAAGAAATTG
CCAAAACTATTAAATTTAACATTGATAGTTTATTTACTGATCCACTTGAATTAGAATATTATTTAAGAGA
AAAAAATAAAAAAGTTGATGTAACACCTAAATCACAAGATCCTACGAAATCTGTTCAAATACCAAAAGTT
CCTTATCCAAATGGTATTGTATATCCTTTACCACTCACTGATATTCATAATTCATTAGCTGCAGATAATG
ATAAAAATTCATATGGTGATTTAATGAATCCTAATACTAAAGAAAAAATTAATGAAAAAATTATTACAGA
TAATAAGGAAAGAAAAATATTCATTAATAACATTAAAAAACAAATTGATTTAGAAGAAAAAAACATTAAT
CACACAAAAGAACAAAATAAAAAATTACTTGAAGATTATGAAAAGTCAAAAAAGGATTATGAAGAATTAC
TTGAAAAATTTTATGAAATGAAATTTAATAATAATTTTGACAAAGATGTCGTAGATAAAATATTCAGTGC
AAGATATACATATAATGTTGAAAAACAAAGATATAATAATAAATTTTCATCCTCTAATAATTCTGTATAT
AATGTTCAAAAATTAAAAAAGGCTCTTTCATATCTTGAAGATTATTCTTTAAGAAAAGGAATTTCTGAAA
AAGATTTTAATCATTATTATACTTTGAAAACTGGCCTCGAAGCTGATATAAAAAAATTAACAGAAGAAAT
AAAGAGTAGTGAAAACAAAATTCTAGAAAAAAATTTTAAAGGACTAACACATTCAGCAAATGCTTCCTTA
GAAGTATATGATATTGTAAAATTACAAGTACAAAAAGTTTTATTAATTAAAAAAATAGAAGACTTAAGAA
AGATAGAATTATTTTTAAAAAATGCACAACTAAAAGATAGTATTCATGTACCAAATATTTATAAACCACA
AAATAAACCAGAACCATATTATTTAATTGTATTAAAAAAAGAAGTAGATAAATTAAAAGAATTTATACCA
AAAGTAAAAGACATGTTAAAGAAAGAACAAGCTGTCTTATCAAGTATTACACAACCTTTAGTTGCAGCAA
GCGAAACAACTGAAGATGGGGGTCACTCCACACACACATTATCCCAATCAGGAGAAACAGAAGTAACAGA
AGAAACAGAAGAAACAGAAGAAACAGTAGGACACACAACAACGGTAACAATAACATTACCACCAAAAGAA
GTAAAAGTTGTTGAAAATTCAATAGAACATAAGAGTAATGACAATTCACAAGCCTTGACAAAAACAGTTT
ATCTAAAGAAATTAGATGAATTTTTAACTAAATCATATATATGTCATAAATATATTTTAGTATCAAACTC
TAGTATGGACCAAAAATTATTAGAGGTATATAATCTTACTCCAGAAGAAGAAAATGAATTAAAATCATGT
GATCCATTAGATTTATTATTTAATATTCAAAATAACATACCTGCTATGTATTCATTATATGATAGTATGA
ACAATGATTTACAACATCTCTTTTTTGAATTATATCAAAAGGAAATGATTTATTATTTACATAAACTAAA
AGAGGAAAATCACATCAAAAAATTATTAGAGGAGCAAAAACAAATAACTGGAACATCATCTACATCCAGT
CCTGGAAATACAACCGTAAATACTGCTCAATCCGCAACTCACAGTAATTCCCAAAACCAACAATCAAATG
CATCCTCTACCAATACCCAAAATGGTGTAGCTGTATCATCTGGTCCTGCTGTAGTTGAAGAAAGTCATGA
TCCCTTAACAGTATTGTCTATTAGTAACGATTTGAAAGGTATTGTTAGTCTCTTAAATCTTGGAAATAAA
ACTAAAGTACCTAATCCATTAACCATTTCTACAACAGAGATGGAAAAATTTTATGAGAATATTTTAAAAA
ATAATGATACCTATTTTAATGATGATATCAAACAATTCGTAAAATCTAATTCAAAAGTAATTACAGGTTT
GACCGAAACACAAAAAAATGCATTAAATGATGAAATTAAAAAATTAAAAGATACTTTACAGTTATCATTT
GATTTATATAATAAATATAAATTAAAATTAGATAGATTATTTAATAAGAAAAAAGAACTTGGCCAAGACA
AAATGCAAATTAAAAAACTTACTTTATTAAAAGAACAATTAGAATCAAAATTGAATTCACTTAATAACCC
ACATAATGTATTACAAAACTTTTCTGTTTTCTTTAACAAAAAAAAAGAAGCTGAAATAGCAGAAACTGAA
AACACATTAGAAAACACAAAAATATTATTGAAACATTATAAAGGACTTGTTAAATATTATAATGGTGAAT
CATCTCCATTAAAAACTTTAAGTGAAGTATCAATTCAAACAGAAGATAATTATGCCAATTTAGAAAAATT
TAGAGTATTAAGTAAAATAGATGGAAAACTCAATGATAATTTACATTTAGGAAAGAAAAAATTATCTTTC
TTATCAAGTGGATTACATCATTTAATTACTGAATTAAAAGAAGTAATAAAAAATAAAAATTATACAGGTA
ATTCTCCAAGTGAAAATAATAAGAAAGTTAACGAAGCTTTAAAATCTTACGAAAATTTTCTCCCAGAAGC
AAAAGTTACAACAGTTGTAACTCCACCTCAACCAGATGTAACTCCATCTCCATTATCTGTAAGGGTAAGT
GGTAGTTCAGGATCCACAAAAGAAGAAACACAAATACCAACTTCAGGCTCTTTATTAACAGAATTACAAC
AAGTAGTACAATTACAAAATTATGACGAAGAAGATGATTCCTTAGTTGTATTACCCATTTTTGGAGAATC
CGAAGATAATGACGAATATTTAGATCAAGTAGTAACTGGAGAAGCAATATCTGTCACAATGGATAATATC
CTCTCAGGATTTGAAAATGAATATGATGTTATATATTTAAAACCTTTAGCTGGAGTATATAGAAGCTTAA
AAAAACAAATTGAAAAAAACATTTTTACATTTAATTTAAATTTGAACGATATCTTAAATTCACGTCTTAA
GAAACGAAAATATTTCTTAGATGTATTAGAATCTGATTTAATGCAATTTAAACATATATCCTCAAATGAA
TACATTATTGAAGATTCATTTAAATTATTGAATTCAGAACAAAAAAACACACTTTTAAAAAGTTACAAAT
ATATAAAAGAATCAGTAGAAAATGATATTAAATTTGCACAGGAAGGTATAAGTTATTATGAAAAGGTTTT
AGCGAAATATAAGGATGATTTAGAATCAATTAAAAAAGTTATCAAAGAAGAAAAGGAGAAGTTCCCATCA
TCACCACCAACAACACCTCCGTCACCAGCAAAAACAGACGAACAAAAGAAGGAAAGTAAGTTCCTTCCAT
TTTTAACAAACATTGAGACCTTATACAATAACTTAGTTAATAAAATTGACGATTACTTAATTAACTTAAA
GGCAAAGATTAACGATTGTAATGTTGAAAAAGATGAAGCACATGTTAAAATAACTAAACTTAGTGATTTA
AAAGCAATTGATGACAAAATAGATCTTTTTAAAAACCATAACGACTTCGAAGCAATTAAAAAATTGATAA
ATGATGATACGAAAAAAGATATGCTTGGCAAATTACTTAGTACAGGATTAGTTCAAAATTTTCCTAATAC
AATAATATCAAAATTAATTGAAGGAAAATTCCAAGATATGTTAAACATTTCACAACACCAATGCGTAAAA
AAACAATGTCCAGAAAATTCTGGATGTTTCAGACATTTAGATGAAAGAGAAGAATGTAAATGTTTATTAA
ATTACAAACAAGAAGGTGATAAATGTGTTGAAAATCCAAATCCTACTTGTAACGAAAATAATGGTGGATG
TGATGCAGATGCCAAATGTACCGAAGAAGATTCAGGTAGCAACGGAAAGAAAATCACATGTGAATGTACT
AAACCTGATTCTTATCCACTTTTCGATGGTATTTTCTGCAGTTCCTCTAACTTCTTAGGAATATCATTCT
TATTAATACTCATGTTAATATTATACAGTTTCATTTAA

>AB502448.1 Plasmodium falciparum msp1 gene for merozoite surface protein-1, complete cds, isolate: Tz03-068
ATGAAGATCATATTCTTTTTATGTTCATTTCTTTTTTTTATTATAAATACACAATGTGTAACACATGAAA
GTTATCAAGAACTTGTCAAAAAACTAGAAGCTTTAGAAGATGCAGTATTGACAGGTTATGGTTTATTTCA
TAAGGAAAAAATGATCTTAAATGAAGAAGAAATTACTACAAAAGGTGCAAGTGCTCAAAGTGGTACAAGT
GGTACAAGTGGTCCAAGTGGTACAAGTCCATCATCTCGTTCAAACACTTTACCTCGTTCAAATACTTCAT
CTGGTGCAAGCCCTCCAGCTGATGCAAGCCCTCCAGCTGATGCAAGCCCTCCAGCTGATGCAAGCCCTCC
AGCTGATGCAAGCGATTCAGATGCTAAATCTTACGCTGATTTAAAACACAGAGTACGAAATTACTTGTTC
ACTATTAAAGAACTCAAATATCCCGAACTCTTTGATTTAACCAATCATATGTTAACTTTGTGTGATAATA
TTCATGGTTTCAAATATTTAATTGATGGATATGAAGAAATTAATGAATTATTATATAAATTAAACTTTTA
TTTTGATTTATTAAGAGCAAAATTAAATGATGTATGTGCTAATGATTATTGTCAAATACCTTTCAATCTT
AAAATTCGTGCAAATGAATTAGACGTACTTAAAAAACTTGTGTTCGGATATAGAAAACCATTAGACAATA
TTAAAGATAATGTAGGAAAAATGGAAGATTACATTAAAAAAAATAAAACAACCATAGCAAATATAAATGA
ATTAATTGAAGGAAGTAAGAAAACAATTGATCAAAATAAGAATGCAGATAATGAAGAAGGAAAAAAAAAA
TTATACCAAGCTCAATATGATCTTTCTATTTACAATAAACAATTAGAAGAAGCACATAATTTAATAAGCG
TTTTAGAAAAACGTATTGACACTTTAAAAAAAAATGAAAACATAAAGAAATTACTTGAAGATATAGATAA
AATTAAAACAGATGCCGAAAAACCCACTACTGGAAGTAAACCAAATACTCTCCTTGATAAGAACAAAAAA
ATCGAGGAACACGAAGAAAAAATAAAAGAAATTGCCAAAACTATTAAATTTAACATTGATAGTTTATTTA
CTGATCCACTTGAATTAGAATATTATTTAAGAGAAAAAAATAAAAAAGTTGATGTAACACCTAAATCACA
AGATCCTACGAAATCTGTTCAAATACCAAAAGTTCCTTATCCAAATGGTATTGTATATCCTTTACCACTC
ACTGATATTCATAATTCATTAGCTGCAGATAATGATAAAAATTCATATGGTGATTTAATGAATCCTGATA
CTAAAGAAAAAATTAATGAAAAAATTATTACAGATAATAAGGAAAGAAAAATATTCATTAATAACATTAA
AAAACAAATTGATTTAGAAGAAAAAAACATTAATCACACAAAAGAACAAAATAAAAAATTACTTGAAGAT
TATGAAAAGTCAAAAAAGGATTATGAAGAATTACTTGAAAAATTTTATGAAATGAAATTTAATAATAATT
TTGACAAAGATGTCGTAGATAAAATATTCAGTGCAAGATATACATATAATGTTGAAAAACAAAGATATAA
TAATAAATTTTCATCCTCTAATAATTCTGTATATAATGTTCAAAAATTAAAAAAGGCTCTTTCATATCTT
GAAGATTATTCTTTAAGAAAAGGAATTTCTGAAAAAGATTTTAATCATTATTATACTTTGAAAACTGGCC
TCGAAGCTGATATAAAAAAATTAACAGAAGAAATAAAGAGTAGTGAAAACAAAATTCTAGAAAAAAATTT
TAAAGGACTAACACATTCAGCAAATGCTTCCTTAGAAGTATATGATATTGTAAAATTACAAGTACAAAAA
GTTTTATTAATTAAAAAAATAGAAGACTTAAGAAAGATAGAATTATTTTTAAAAAATGCACAACTAAAAG
ATAGTATTCATGTACCAAATATTTATAAACCACAAAATAAACCAGAACCATATTATTTAATTGTATTAAA
AAAAGAAGTAGATAAATTAAAAGAATTTATACCAAAAGTAAAAGACATGTTAAAGAAAGAACAAGCTGTC
TTATCAAGTATTACACAACCTTTAGTTGCAGCAAGCGAAACAACTGAAGATGGGGGTCACTCCACACACA
CATTATCCCAATCAGGAGAAACAGAAGTAACAGAAGAAACAGAAGGACACACAACAACGGTAACAATAAC
ATTACCACCAACACAACCATCACCACCAAAAGAAGTAAAAGTTGTTGAAAATTCAATAGAACATAAGAGT
AATGACAATTCACAAGCCTTGACAAAAACAGTTTATCTAAAGAAATTAGATGAATTTTTAACTAAATCAT
ATATATGTCATAAATATATTTTAGTATCAAACTCTAGTATGGACCAAAAATTATTAGAGGTATATAATCT
TACTCCAGAAGAAGAAAATGAATTAAAATCATGTGATCCATTAGATTTATTATTTAATATTCAAAATAAC
ATACCTGCTATGTATTCATTATATGATAGTATGAACAATGATTTACAACATCTCTTTTTTGAATTATATC
AAAAGGAAATGATTTATTATTTACATAAACTAAAAGAGGAAAATCACATCAAAAAATTATTAGAGGAGCA
AAAACAAATAACTGGAACATCATCTACATCCAGTCCTGGAAATACAACCGTAAATACTGCTCAATCCGCA
ACTCACAGTAATTCCCAAAACCAACAATCAAATGCATCCTCTACCAATACCCAAAATGGTGTAGCTGTAT
CATCTGGTCCTGCTGTAGTTGAAGAAAGTCATGATCCCTTAACAGTATTGTCTATTAGTAACGATTTGAA
AGGTATTGTTAGTCTCTTAAATCTTGGAAATAAAACTAAAGTACCTAATCCATTAACCATTTCTACAACA
GAGATGGAAAAATTTTATGAGAATATTTTAAAAAATAATGATACCTATTTTAATGATGATATCAAACAAT
TCGTAAAATCTAATTCAAAAGTAATTACAGGTTTGACCGAAACACAAAAAAATGCATTAAATGATGAAAT
TAAAAAATTAAAAGATACTTTACAGTTATCATTTGATTTATATAATAAATATAAATTAAAATTAGATAGA
TTATTTAATAAGAAAAAAGAACTTGGCCAAGACAAAATGCAAATTAAAAAACTTACTTTATTAAAAGAAC
AATTAGAATCAAAATTGAATTCACTTAATAACCCACATAATGTATTACAAAACTTTTCTGTTTTCTTTAA
CAAAAAAAAAGAAGCTGAAATAGCAGAAACTGAAAACACATTAGAAAACACAAAAATATTATTGAAACAT
TATAAAGGACTTGTTAAATATTATAATGGTGAATCATCTCCATTAAAAACTTTAAGTGAAGTATCAATTC
AAACAGAAGATAATTATGCCAATTTAGAAAAATTTAGAGTATTAAGTAAAATAGATGGAAAACTCAATGA
TAATTTACATTTAGGAAAGAAAAAATTATCTTTCTTATCAAGTGGATTACATCATTTAATTACTGAATTA
AAAGAAGTAATAAAAAATAAAAATTATACAGGTAATTCTCCAAGTGAAAATAATAAGAAAGTTAACGAAG
CTTTAAAATCTTACGAAAATTTTCTCCCAGAAGCAAAAGTTACAACAGTTGTAACTCCACCTCAACCAGA
TGTAACTCCATCTCCATTATCTGTAAGGGTAAGTGGTAGTTCAGGATCCACAAAAGAAGAAACACAAATA
CCAACTTCAGGCTCTTTATTAACAGAATTACAACAAGTAGTACAATTACAAAATTATGACGAAGAAGATG
ATTCCTTAGTTGTATTACCCATTTTTGGAGAATCCGAAGATAATGACGAATATTTAGATCAAGTAGTAAC
TGGAGAAGCAATATCTGTCACAATGGATAATATCCTCTCAGGATTTGAAAATGAATATGATGTTATATAT
TTAAAACCTTTAGCTGGAGTATATAGAAGCTTAAAAAAACAAATTGAAAAAAACATTTTTACATTTAATT
TAAATTTGAACGATATCTTAAATTCACGTCTTAAGAAACGAAAATATTTCTTAGATGTATTAGAATCTGA
TTTAATGCAATTTAAACATATATCCTCAAATGAATACATTATTGAAGATTCATTTAAATTATTGAATTCA
GAACAAAAAAACACACTTTTAAAAAGTTACAAATATATAAAAGAATCAGTAGAAAATGATATTAAATTTG
CACAGGAAGGTATAAGTTATTATGAAAAGGTTTTAGCGAAATATAAGGATGATTTAGAATCAATTAAAAA
AGTTATCAAAGAAGAAAAGGAGAAGTTCCCATCATCACCACCAACAACACCTCCGTCACCAGCAAAAACA
GACGAACAAAAGAAGGAAAGTAAGTTCCTTCCATTTTTAACAAACATTGAGACCTTATACAATAACTTAG
TTAATAAAATTGACGATTACTTAATTAACTTAAAGGCAAAGATTAACGATTGTAATGTTGAAAAAGATGA
AGCACATGTTAAAATAACTAAACTTAGTGATTTAAAAGCAATTGATGACAAAATAGATCTTTTTAAAAAC
CATAACGACTTCGAAGCAATTAAAAAATTGATAAATGATGATACGAAAAAAGATATGCTTGGCAAATTAC
TTAGTACAGGATTAGTTCAAAATTTTCCTAATACAATAATATCAAAATTAATTGAAGGAAAATTCCAAGA
TATGTTAAACATTTCACAACACCAATGCGTAAAAAAACAATGTCCAGAAAATTCTGGATGTTTCAGACAT
TTAGATGAAAGAGAAGAATGTAAATGTTTATTAAATTACAAACAAGAAGGTGATAAATGTGTTGAAAATC
CAAATCCTACTTGTAACGAAAATAATGGTGGATGTGATGCAGATGCCAAATGTACCGAAGAAGATTCAGG
TAGCAACGGAAAGAAAATCACATGTGAATGTACTAAACCTGATTCTTATCCACTTTTCGATGGTATTTTC
TGCAGTTCCTCTAACTTCTTAGGAATATCATTCTTATTAATACTCATGTTAATATTATACAGTTTCATTT
AA

>AB502449.1 Plasmodium falciparum msp1 gene for merozoite surface protein-1, complete cds, isolate: Tz03-070
ATGAAGATCATATTCTTTTTATGTTCATTTCTTTTTTTTATTATAAATACACAATGTGTAACACATGAAA
GTTATCAAGAACTTGTCAAAAAACTAGAAGCTTTAGAAGATGCAGTATTGACAGGTTATAGTTTATTTCA
AAAGGAAAAAATGGTATTAAATGAAGGAACAAGTGGAACAGCTGTTACAACTAGTACACCTGGTTCAAAG
GGTTCAGTTACTTCAGGTGGTTCAGGTGGTTCAGTTGCTTCAGGTGGTTCAGGTGGCTCAGTTGCTTCAG
GTGGCTCAGTTGCTTCAGGTGGCTCAGTTGCTTCAGGTGGTTCAGGTAATTCAAGACGTACAAATCCTTC
AGATAATTCAAGTGATTCAGATGCTAAATCTTACGCTGATTTAAAACATAGAGTTCAAAATTACTTGTTC
ACTATTAAAGAACTCAAATATCCCGAACTCTTTGATTTAACCAATCATATGTTAACTTTGTGTGATAATA
TTCATGGTTTCAAATATTTAATTGATGGATATGAAGAAATTAATGAATTATTATATAAATTAAACTTTTA
TTTTGATTTATTAAGAGCAAAATTAAATGATGTATGTGCTAATGATTATTGTCAAATACCTTTCAATCTT
AAAATTCGTGCAAATGAATTAGACGTACTTAAAAAACTTGTGTTCGGATATAGAAAACCATTAGACAATA
TTAAAGATAATGTAGGAAAAATGGAAGATTACATTAAAAAAAATAAAACAACCATAGCAAATATAAATGA
ATTAATTGAAGGAAGTAAGAAAACAATTGATCAAAATAAGAATGCAGATAATGAAGAAGGAAAAAAAAAA
TTATACCAAGCTCAATATGATCTTTCTATTTACAATAAACAATTAGAAGAAGCACATAATTTAATAAGCG
TTTTAGAAAAACGTATTGACACTTTAAAAAAAAATGAAAACATAAAGAAATTACTTGAAGATATAGATAA
AATTAAAACAGATGCCGAAAAACCCACTACTGGAAGTAAACCAAATACTCTCCTTGATAAGAACAAAAAA
ATCGAGGAACACGAAGAAAAAATAAAAGAAATTGCCAAAACTATTAAATTTAACATTGATAGTTTATTTA
CTGATCCACTTGAATTAGAATATTATTTAAGAGAAAAAAATAAAAAAGTTGATGTAACACCTAAATCACA
AGATCCTACGAAATCTGTTCAAATACCAAAAGTTCCTTATCCAAATGGTATTGTATATCCTTTACCACTC
ACTGATATTCATAATTCATTAGCTGCAGATAATGATAAAAATTCATATGGTGATTTAATGAATCCTGATA
CTAAAGAAAAAATTAATGAAAAAATTATTACAGATAATAAGGAAAGAAAAATATTCATTAATAACATTAA
AAAACAAATTGATTTAGAAGAAAAAAAAATTAATCACACAAAAGAACAAAATAAAAAATTACTTGAAGAT
TATGAAAAGTCAAAAAAGGATTATGAAGAATTACTTGAAAAATTTTATGAAATGAAATTTAATAATAATT
TTGACAAAGATGTCGTAGATAAAATATTCAGTGCAAGATATACATATAATGTTGAAAAACAAAGATATAA
TAATAAATTTTCATCCTCTAATAATTCTGTATATAATGTTCAAAAATTAAAAAAGGCTCTTTCATATCTT
GAAGATTATTCTTTAAGAAAAGGAATTTCTGAAAAAGATTTTAATCATTATTATACTTTGAAAACTGGCC
TCGAAGCTGATATAAAAAAATTAACAGAAGAAATAAAGAGTAGTGAAAACAAAATTCGAGAAAAAAATTT
TAAAGGACTAACACATTCAGCAAATGCTTCCTTAGAAGTATCTGATATTGTAAAATTACAAGTACAAAAA
GTTTTATTAATTAAAAAAATAGAAGACTTAAGAAAGATAGAATTATTTTTAAAAAATGCACAACTAAAAG
ATAGTATTCATGTACCAAATATTTATAAACCACAAAATAAACCAGAACCATATTATTTAATTGTATTAAA
AAAAGAAGTAGATAAATTAAAAGAATTTATACCAAAAGTAAAAGACATGTTAAAGAAAGAACAAGCTGTC
TTATCAAGTATTACACAACCTTTAGTTGCAGCAAGCGAAACAACTGAAGATGGGGGTCACTCCACACACA
CATTATCCCAATCAGGAGAAACAGAAGTAACAGAAGAAACAGAAGAAACAGAAGAAACAGTAGGACACAC
AACAACGGTAACAATAACATTACCACCAACACAACCATCACCACCAAAAGAAGTAAAAGTTGTTGAAAAT
TCAATAGAACATAAGAGTAATGACAATTCACAAGCCTTGACAAAAACAGTTTATCTAAAGAAATTAGATG
AATTTTTAACTAAATCATATATATGTCATAAATATATTTTAGTATCAAACTCTAGTATGGACCAAAAATT
ATTAGAGGTATATAATCTTACTCCAGAAGAAAAAAATGAATTAAAATCATGTGATCCATTAGATTTATTA
TTTAATATTCAAAATAACATACCTGCTATGTATTCATTATATGATAGTATGAACAATGATTTACAACATC
TCTTTTTTGAATTATATCAAAAGGAAATGATTTATTATTTACATAAACTAAAAGAGGAAAATCACATCAA
AAAATTATTAGAGGAGCAAAAACAAATAACTGGAACATCATCTACATCCAGTCCTGGAAATACAACCGTA
AATACTGCTCAATCCGCAACTCACAGTAATTCCCAAAACCAACAATCAAATGCATCCTCTACCAATACCC
AAAATGGTGTAGCTGTATCATCTGGTCCTGCTGTAGTTGAAGAAAGTCATGATCCCTTAACAGTATTGTC
TATTAGTAACGATTTGAAAGGTATTGTTAGTCTCTTAAATCTTGGAAATAAAACTAAAGTACCTAATCCA
TTAACCATTTCTACAACAGAGATGGAAAAATTTTATGAGAATATTTTAAAAAATAATGATACCTATTTTA
ATGATGATATCAAACAATTCGTAAAATCTAATTCAAAAGTAATTACAGGTTTGACCGAAACACAAAAAAA
TGCATTAAATGATGAAATTAAAAAATTAAAAGATACTTTACAGTTATCATTTGATTTATATAATAAATAT
AAATTAAAATTAGATAGATTATTTAATAAGAAAAAAGAACTTGGCCAAGACAAAATGCAAATTAAAAAAC
TTACTTTATTAAAAGAACAATTAGAATCAAAATTGAATTCACTTAATAACCCACATAATGTATTACAAAA
CTTTTCTGTTTTCTTTAACAAAAAAAAAGAAGCTGAAATAGCAGAAACTGAAAACACATTAGAAAACACA
AAAATATTATTGAAACATTATAAAGGACTTGTTAAATATTATAATGGTGAATCATCTCCATTAAAAACTT
TAAGTGAAGTATCAATTCAAACAGAAGATAATTATGCCAATTTAGAAAAATTTAGAGTATTAAGTAAAAT
AGATGGAAAACTCAATGATAATTTACATTTAGGAAAGAAAAAATTATCTTTCTTATCAAGTGGATTACAT
CATTTAATTACTGAATTAAAAGAAGTAATAAAAAATAAAAATTATACAGGTAATTCTCCAAGTGAAAATA
ATAAGAAAGTTAACGAAGCTTTAAAATCTTACGAAAATTTTCTCCCAGAAGCAAAAGTTACAACAGTTGT
AACTCCACCTCAACCAGATGTAACTCCATCTCCATTATCTGTAAGGGTAAGTGGTAGTTCAGGATCCACA
AAAGAAGAAACACAAATACCAACTTCAGGCTCTTTATTAACAGAATTACAACAAGTAGTACAATCACAAA
ATTATGACGAAGAAGATGATTCCTTAGTTGTATTACCCATTTTTGGAGAATCCGAAGATAATGACGAATA
TTTAGATCAAGTAGTAACTGGAGAAGCAATATCTGTCACAATGGATAATATCCTCTCAGGATTTGAAAAT
GAATATGATGTTATATATTTAAAACCTTTAGCTGGAGTATATAGAAGCTTAAAAAAACAAATTGAAAAAA
ACATTTTTACATTTAATTTAAATTTGAACGATATCTTAAATTCACGTCTTAAGAAACGAAAATATTTCTT
AGATGTATTAGAATCTGATTTAATGCAATTTAAACATATATCCTCAAATGAATACATTATTGAAGATTCA
TTTAAATTATTGAATTCAGAACAAAAAAACACACTTTTAAAAAGTTACAAATATATAAAAGAATCAGTAG
AAAATGATATTAAATTTGCACAGGAAGGTATAAGTTATTATGAAAAGGTTTTAGCGAAATATAAGGATGA
TTTAGAATCAATTAAAAAAGTTATCAAAGAAGAAAAGGAGAAGTTCCCATCATCACCACCAACAACACCT
CCGTCACCAGCAAAAACAGACGAACAAAAGAAGGAAAGTAAGTTCCTTCCATTTTTAACAAACATTGAGA
CCTTATACAATAACTTAGTTAATAAAATTGACGATTACTTAATTAACTTAAAGGCAAAGATTAACGATTG
TAATGTTGAAAAAGATGAAGCACATGTTAAAATAACTAAACTTAGTGATTTAAAAGCAATTGATGACAAA
ATAGATCTTTTTAAAAACCATAACGACTTCGAAGCAATTAAAAAATTGATAAATGATGATACGAAAAAAG
ATATGCTTGGCAAATTACTTAGTACAGGATTAGTTCAAAATTTTCCTAATACAATAATATCAAAATTAAT
TGAAGGAAAATTCCAAGATATGTTAAACATTTCACAACACCAATGCGTAAAAAAACAATGTCCAGAAAAT
TCTGGATGTTTCAGACATTTAGATGAAAGAGAAGAATGTAAATGTTTATTAAATTACAAACAAGAAGGTG
ATAAATGTGTTGAAAATCCAAATCCTACTTGTAACGAAAATAATGGTGGATGTGATGCAGATGCCACATG
TACCGAAGAAGATTCAGGTAGCAGCAGAAAGAAAATCACATGTGAATGTACTAAACCTGATTCTTATCCA
CTTTTCGATGGTATTTTCTGCAGTTCCTCTAACTTCTTAGGAATATCATTCTTATTAATACTCATGTTAA
TATTATACAGTTTCATTTAA

>AB502450.1 Plasmodium falciparum msp1 gene for merozoite surface protein-1, complete cds, isolate: Tz03-076
ATGAAGATCATATTCTTTTTATGTTCATTTCTTTTTTTTATTATAAATACACAATGTGTAACACATGAAA
GTTATCAAGAACTTGTCAAAAAACTAGAAGCTTTAGAAGATGCAGTATTGACAGGTTATAGTTTATTTCA
AAAGGAAAAAATGGTATTAAATGAAGAAGAAATTACTACAAAAGGTGCAAGTGCTCAAAGTGGTGCAAGT
GCTCAAAGTGGTGCAAGTGCTCAAAGTGGTGCAAGTGCTCAAAGTGGTGCAAGTGCTCAAAGTGGTACAA
GTGGTCCAAGTGGTACAAGTGGTCCAAGTGGTCCAAGTGGTACAAGTCCATCATCTCGTTCAAACACTTT
ACCTCGTTCAAATACTTCATCTGGTGCAAGCCCTCCAGCTGATGCAAGCGATTCAGATGCTAAATCTTAC
GCTGATTTAAAACACAGAGTACGAAATTACTTGTTCACTATTAAAGAACTCAAATATCCCGAACTCTTTG
ATTTAACCAATCATATGTTAACTTTGTGTGATAATATTCATGGTTTCAAATATTTAATTGATGGATATGA
AGAAATTAATGAATTATTATATAAATTAAACTTTTATTTTGATTTATTAAGAGCAAAATTAAATGATGTA
TGTGCTAATGATTATTGTCAAATACCTTTCAATCTTAAAATTCGTGCAAATGAATTAGACGTACTTAAAA
AACTTGTGTTCGGATATAGAAAACCATTAGACAATATTAAAGATAATGTAGGAAAAATGGAAGATTACAT
TAAAAAAAATAAAACAACCATAGCAAATATAAATGAATTAATTGAAGGAAGTAAGAAAACAATTGATCAA
AATAAGAATGCAGATAATGAAGAAGGAAAAAAAAAATTATACCAAGCTCAATATGATCTTTTTATTTACA
ATAAACAATTACAAGAAGCACATAATTTAATAAGCGTTTTAGAAAAACGTATTGACACTTTAAAAAAAAA
TGAAAACATAAAGAAATTACTTGAAGATATAGATAAAATTAAAACAGATGCCGAAAAACTCACTACTGGA
AGTAAACCAAATACTCTCCTTGATAAGAACAAAAAAATCGAGGAACACGAAGAAAAAATAAAAGAAATTG
CCAAAACTATTAAATTTAACATTGATAGTTTATTTACTGATCCACTTGAATTAGAATATTATTTAAGAGA
AAAAAATAAAAAAGTTGATGTAACACCTAAATCACAAGATCCTACGAAATCTGTTCAAATACCAAAAGTT
CCTTATCCAAATGGTATTGTATATCCTTTACCACTCACTGATATTCATAATTCATTAGCTGCAGATAATG
ATAAAAATTCATATGGTGATTTAATGAATCCTAATACTAAAGAAAAAATTAATGAAAAAATTATTACAGA
TAATAAGGAAAGAAAAATATTCATTAATAACATTAAAAAACAAATTGATTTAGAAGAAAAAAACATTAAT
CACACAAAAGAACAAAATAAAAAATTACTTGAAGATTATGAAAAGTCAAAAAAGGATTATGAAGAATTAC
TTGAAAAATTTTATGAAATGAAATTTAATAATAATTTTGACAAAGATGTCGTAGATAAAATATTCAGTGC
AAGATATACATATAATGTTGAAAAACAAAGATATAATAATAAATTTTCATCCTCTAATAATTCTGTATAT
AATGTTCAAAAATTAAAAAAGGCTCTTTCATATCTTGAAGATTATTCTTTAAGAAAAGGAATTTCTGAAA
AAGATTTTAATCATTATTATACTTTGAAAACTGGCCTCGAAGCTGATATAAAAAAATTAACAGAAGAAAT
AAAGAGTAGTGAAAACAAAATTCGAGAAAAAAATTTTAAAGGACTAACACATTCAGCAAATGCTTCCTTA
GAAGTATCTGATATTGTAAAATTACAAGTACAAAAAGTTTTATTAATTAAAAAAATAGAAGACTTAAGAA
AGATAGAATTATTTTTAAAAAATGCACAACTAAAAGATAGTATTCATGTACCAAATATTTATAAACCACA
AAATAAACCAGAACCATATTATTTAATTGTATTAAAAAAAGAAGTAGATAAATTAAAAGAATTTATACCA
AAAGTAAAAGACATGTTAAAGAAAGAACAAGCTGTCTTATCAAGTATTACACAACCTTTAGTTGCAGCAA
GCGAAACAACTGAAGATGGGGGTCACTCCACACACACATTATCCCAATCAGGAGAAACAGAAGTAACAGA
AGAAACAGAAGAAACAGAAGAAACAGGAGGACACACAACAACGGTAACAATAACATTACCACCAACACAA
CCATCACCACCAAAAGAAGTAAAAGTTGTTGAAAATTCAATAGAACATAAGAGTAATGACAATTCACAAG
CCTTGACAAAAACAGTTTATCTAAAGAAATTAGATGAATTTTTAACTAAATCATATATATGTCATAAATA
TATTTTAGTATCAAACTCTAGTATGGACCAAAAATTATTAGAGGTATATAATCTTACTCCAGAAGAAGAA
AATGAATTAAAATCATGTGATCCATTAGATTTATTATTTAATATTCAAAATAACATACCTGCTATGTATT
CATTATATGATAGTATGAACAATGATTTACAACATCTCTTTTTTGAATTATATCAAAAGGAAATGATTTA
TTATTTACATAAACTAAAAGAGGAAAATCACATCAAAAAATTATTAGAGGAGCAAAAACAAATAACTGGA
ACATCATCTACATCCAGTCCTGGAAATACAACCGTAAATACTGCTCAATCCGCAACTCACAGTAATTCCC
AAAACCAACAATCAAATGCATCCTCTACCAATACCCAAAATGGTGTAGCTGTATCATCTGGTCCTGCTGT
AGTTGAAGAAAGTCATGATCCCTTAACAGTATTGTCTATTAGTAACGATTTGAAAGGTATTGTTAGTCTC
TTAAATCTTGGAAATAAAACTAAAGTACCTAATCCATTAACCATTTCTACAACAGAGATGGAAAAATTTT
ATGAGAATATTTTAAAAAATAATGATACCTATTTTAATGATGATATCAAACAATTCGTAAAATCTAATTC
AAAAGTAATTACAGGTTTGACCGAAACACAAAAAAATGCATTAAATGATGAAATTAAAAAATTAAAAGAT
ACTTTACAGTTATCATTTGATTTATATAATAAATATAAATTAAAATTAGATAGATTATTTAATAAGAAAA
AAGAACTTGGCCAAGACAAAATGCAAATTAAAAAACTTACTTTATTAAAAGAACAATTAGAATCAAAATT
GAATTCACTTAATAACCCACATAATGTATTACAAAACTTTTCTGTTTTCTTTAACAAAAAAAAAGAAGCT
GAAATAGCAGAAACTGAAAACACATTAGAAAACACAAAAATATTATTGAAACATTATAAAGGACTTGTTA
AATATTATAATGGTGAATCATCTCCATTAAAAACTTTAAGTGAAGTATCAATTCAAACAGAAGATAATTA
TGCCAATTTAGAAAAATTTAGAGTATTAAGTAAAATAGATGGAAAACTCAATGATAATTTACATTTAGGA
AAGAAAAAATTATCTTTCTTATCAAGTGGATTACATCATTTAATTACTGAATTAAAAGAAGTAATAAAAA
ATAAAAATTATACAGGTAATTCTCCAAGTGAAAATAATAAGAAAGTTAACGAAGCTTTAAAATCTTACGA
AAATTTTCTCCCAGAAGCAAAAGTTACAACAGTTGTAACTCCACCTCAACCAGATGTAACTCCATCTCCA
TTATCTGTAAGGGTAAGTGGTAGTTCAGGATCCACAAAAGAAGAAACACAAATACCAACTTCAGGCTCTT
TATTAACAGAATTACAACAAGTAGTACAATCACAAAATTATGACGAAGAAGATGATTCCTTAGTTGTATT
ACCCATTTTTGGAGAATCCGAAGATAATGACGAATATTTAGATCAAGTAGTAACTGGAGAAGCAATATCT
GTCACAATGGATAATATCCTCTCAGGATTTGAAAATGAATATGATGTTATATATTTAAAACCTTTAGCTG
GAGTATATAGAAGCTTAAAAAAACAAATTGAAAAAAACATTTTTACATTTAATTTAAATTTGAACGATAT
CTTAAATTCACGTCTTAAGAAACGAAAATATTTCTTAGATGTATTAGAATCTGATTTAATGCAATTTAAA
CATATATCCTCAAATGAATACATTATTGAAGATTCATTTAAATTATTGAATTCAGAACAAAAAAACACAC
TTTTAAAAAGTTACAAATATATAAAAGAATCAGTAGAAAATGATATTAAATTTGCACAGGAAGGTATAAG
TTATTATGAAAAGGTTTTAGCGAAATATAAGGATGATTTAGAATCAATTAAAAAAGTTATCAAAGAAGAA
AAGGAGAAGTTCCCATCATCACCACCAACAACACCTCCGTCACCAGCAAAAACAGACGAACAAAAGAAGG
AAAGTAAGTACCTTCCATTTTTAACAAACATTGAGACCTTATACAATAACTTAGTTAATAAAATTGACGA
TTACTTAATTAACTTAAAGGCAAAGATTAACGATTGTAATGTTGAAAAAAATGAAGCACATGTTAAAATA
ACTAAACTTAGTGATTTAAAAGCAATTGATGACAAAATAGATCTTTTTAAAAACCCTTACGACTTCGAAG
CAATTAAAAAATTGATAAATGATGATACGAAAAAAGATATGCTTGGCAAATTACTTAGTACAGGATTAGT
TCAAAATTTTCCTAATACAATAATATCAAAATTAATTGAAGGAAAATTCCAAGATATGTTAAACATTTCA
CAACACCAATGCGTAAAAAAACAATGTCCACAAAATTCTGGATGTTTCAGACATTTAGATGAAAGAGAAG
AATGTAAATGTTTATTAAATTACAAACAAGAAGGTGATAAATGTGTTGAAAATCCAAATCCTACTTGTAA
CGAAAATAATGGTGGATGTGATGCAGATGCCAAATGTACCGAAGAAGATTCAGGTAGCAACGGAAAGAAA
ATCACATGTGAATGTACTAAACCTGATTCTTATCCACTTTTCGATGGTATTTTCTGCAGTTCCTCTAACT
TCTTAGGAATATCATTCTTATTAATACTCATGTTAATATTATACAGTTTCATTTAA

>AB502451.1 Plasmodium falciparum msp1 gene for merozoite surface protein-1, complete cds, isolate: Tz03-081
ATGAAGATCATATTCTTTTTATGTTCATTTCTTTTTTTTATTATAAATACACAATGTGTAACACATGAAA
GTTATCAAGAACTTGTCAAAAAACTAGAAGCTTTAGAAGATGCAGTATTGACAGGTTATGGTTTATTTCA
TAAGGAAAAAATGATCTTAAATGAAGAAGAAATTACTACAAAAGGTGCAAGTGCTCAAAGTGGTACAAGT
GGTACAAGTGGTACAAGTGGTACAAGTGGTCCAAGTGGTACAAGTGGTACAAGTCCATCATCTCGTTCAA
ACACTTTACCTCGTTCAAATACTTCATCTGGTGCAAGCCCTCCAGCTGATGCAAGCGATTCAGATGCTAA
ATCTTACGCTGATTTAAAACACAGAGTACGAAATTACTTGTTCACTATTAAAGAACTCAAATATCCCGAA
CTCTTTGATTTAACCAATCATATGTTAACTTTGTGTGATAATATTCATGGTTTCAAATATTTAATTGATG
GATATGAAGAAATTAATGAATTATTATATAAATTAAACTTTTATTTTGATTTATTAAGAGCAAAATTAAA
TGATGTATGTGCTAATGATTATTGTCAAATACCTTTCAATCTTAAAATTCGTGCAAATGAATTAGACGTA
CTTAAAAAACTTGTGTTCGGATATAGAAAACCATTAGACAATATTAAAGATAATGTAGGAAAAATGGAAG
ATTACATTAAAAAAAATAAAACAACCATAGCAAATATAAATGAATTAATTGAAGGAAGTAAGAAAACAAT
TGATCAAAATAAGAATGCAACTAAAGAAGAAGAAAAAAAAAAATTATACCAAGCTCAATATGATCTTTCT
ATTTACAATAAACAATTAGAAGAAGCACATAATTTAATAAGCGTTTTAGAAAAACGTATTGACACTTTAA
AAAAAAATGAAAACATAAAGAAATTACTTGAAGATATAGATAAAATTAAAACAGATGCCGAAAAACCCAC
TACTGGAAGTAAACCAAATACTCTCCTTGATAAGAACAAAAAAATCGAGGAACACGAAGAAAAAATAAAA
GAAATTGCCAAAACTATTAAATTTAACATTGATAGTTTATTTACTGATCCACTTGAATTAGAATATTATT
TAAGAGAAAAAAATAAAAAAGTTGATGTAACACCTAAATCACAAGATCCTACGAAATCTGTTCAAATACC
AAAAGTTCCTTATCCAAATGGTATTGTATATCCTTTACCACTCACTGATATTCATAATTCATTAGCTGCA
GATAATGATAAAAATTCATATGGTGATTTAATGAATCCTGATACTAAAGAAAAAATTAATGAAAAAATTA
TTACAGATAATAAGGAAAGAAAAATATTCATTAATAACATTAAAAAACAAATTGATTTAGAAGAAAAAAA
CATTAATCACACAAAAGAACAAAATAAAAAATTACTTGAAGATTATGAAAAGTCAAAAAAGGATTATGAA
GAATTACTTGAAAAATTTTATGAAATGAAATTTAATAATAATTTTAACAAAGATGTCGTAGATAAAATGT
TCAGTGCAAGATATACATATAATGTTGAAAAACAAAGATATAATAATAAATTTTCATCCTCTAATAATTC
TGTATATAATGTTCAAAAATTAAAAAAGGCTCTTTCATATCTTGAAGATTATTCTTTAAGAAAAGGAATT
TCTGAAAAAGATTTTAATCATTATTATACTTTGAAAACTGGCCTCGAAGCTGATATAAAAAAATTAACAG
AAGAAATAAAGAGTAGTGAAAACAAAATTCTAGAAAAAAATTTTAAAGGACTAACACATTCAGCAAATGC
TTCCTTAGAAGTATCTGATATTGTAAAATTACAAGTACAAAAAGTTTTATTAATTAAAAAAATAGAAGAC
TTAAGAAAGATAGAATTATTTTTAAAAAATGCACAACTAAAAGATAGTATTCATGTACCAAATATTTATA
AACCACAAAATAAACCAGAACCATATTATTTAATTGTATTAAAAAAAGAAGTAGATAAATTAAAAGAATT
TATACCAAAGGTAAAAGACATGTTAAAGAAAGAACAAGCTGTCTTATCAAGTATTACACAACCTTTAGTT
GCAGCAAGCGAAACAACTGAAGATGGGGGTCACTCCACACACACATTATCCCAATCAGGAGAAACAGAAG
TAACAGAAGAAACAGTAGGACACACAACAACGGTAACAATAACATTACCACCAACACAACCATCACCACC
AAAAGAAGTAAAAGTTGTTGAAAATTCAATAGAACATAAGAGTAATGACAATTCACAAGCCTTGACAAAA
ACAGTTTATCTAAAGAAATTAGATGAATTTTTAACTAAATCATATATATGTCATAAATATATTTTAGTAT
CAAACTCTAGTATGGACCAAAAATTATTAGAGGTATATAATCTTACTCCAGAAGAAAAAAATGAATTAAA
ATCATGTGATCCATTAGATTTATTATTTAATATTCAAAATAACATACCTGCTATGTATTCATTATATGAT
AGTATGAACAATGATTTACAACATCTCTTTTTTGAATTATATCAAAAGGAAATGATTTATTATTTACATA
AACTAAAAGAGGAAAATCACATCAAAAAATTATTAGAGGAGCAAAAACAAATAACTGGAACATCATCTAC
ATCCAGTCCTGGAAATACAACCGTAAATACTGCTCAATCCGCAACTCACAGTAATTCCCAAAACCAACAA
TCAAATGCATCCTCTACCAATACCCAAAATGGTGTAGCTGTATCATCTGGTCCTGCTGTAGTTGAAGAAA
GTCATGATCCCTTAACAGTATTGTCTATTAGTAACGATTTGAAAGGTATTGTTAGTCTCTTAAATCTTGG
AAATAAAACTAAAGTACCTAATCCATTAACCATTTCTACAACAGAGATGGAAAAATTTTATGAGAATATT
TTAAAAAATAATGATACCTATTTTAATGATGATATCAAACAATTCGTAAAATCTAATTCAAAAGTAATTA
CAGGTTTGACCGAAACACAAAAAAATGCATTAAATGATGAAATTAAAAAATTAAAAGATACTTTACAGTT
ATCATTTGATTTATATAATAAATATAAATTAAAATTAGATAGATTATTTAATAAGAAAAAAGAACTTGGC
CAAGACAAAATGCAAATTAAAAAACTTACTTTATTAAAAGAACAATTAGAATCAAAATTGAATTCACTTA
ATAACCCACATAATGTATTACAAAACTTTTCTGTTTTCTTTAACAAAAAAAAAGAAGCTGAAATAGCAGA
AACTGAAAACACATTAGAAAACACAAAAATATTATTGAAACATTATAAAGGACTTGTTAAATATTATAAT
GGTGAATCATCTCCATTAAAAACTTTAAGTGAAGTATCAATTCAAACAGAAGATAATTATGCCAATTTAG
AAAAATTTAGAGTATTAAGTAAAATAGATGGAAAACTCAATGATAATTTACATTTAGGAAAGAAAAAATT
ATCTTTCTTATCAAGTGGATTACATCATTTAATTACTGAATTAAAAGAAGTAATAAAAAATAAAAATTAT
ACAGGTAATTCTCCAAGTGAAAATAATAAGAAAGTTAACGAAGCTTTAAAATCTTACGAAAATTTTCTCC
CAGAAGCAAAAGTTACAACAGTTGTAACTCCACCTCAACCAGATGTAACTCCATCTCCATTATCTGTAAG
GGTAAGTGGTAGTTCAGGATCCACAAAAGAAGAAACACAAATACCAACTTCAGGCTCTTTATTAACAGAA
TTACAACAAGTAGTACAATTACAAAATTATGACGAAGAAGATGATTCCTTAGTTGTATTACCCATTTTTG
GAGAATCCGAAGATAATGACGAATATTTAGATCAAGTAGTAACTGGAGAAGCAATATCTGTCACAATGGA
TAATATCCTCTCGGGATTTGAAAATGAATATGATGTTATATATTTAAAACCTTTAGCTGGAGTATATAGA
AGCTTAAAAAAACAAATTGAAAAAAACATTTTTACATTTAATTTAAATTTGAACGATATCTTAAATTCAC
GTCTTAAGAAACGAAAATATTTCTTAGATGTATTAGAATCTGATTTAATGCAATTTAAACATATATCCTC
AAATGAATACATTATTGAAGATTCATTTAAATTATTGAATTCAGAACAAAAAAACACACTTTTAAAAAGT
TACAAATATATAAAAGAATCAGTAGAAAATGATATTAAATTTGCACAGGAAGGTATAAGTTATTATGAAA
AGGTTTTAGCGAAATATAAGGATGATTTAGAATCAATTAAAAAAGTTATCAAAGAAGAAAAGGAGAAGTT
CCCATCATCACCACCAACAACACCTCCGTCACCAGCAAAAACAGACGAACAAAAGAAGGAAAGTAAGTTC
CTTCCATTTTTAACAAACATTGAGACCTTATACAATAACTTAGTTAATAAAATTGACGATTACTTAATTA
ACTTAAAGGCAAAGATTAACGATTGTAATGTTGAAAAAGATGAAGCACATGTTAAAATAACTAAACTTAG
TGATTTAAAAGCAATTGATGACAAAATAGATCTTTTTAAAAACCCTTACGACTTCGAAGCAATTAAAAAA
TTGATAAATGATGATACGAAAAAAGATATGCTTGGCAAATTACTTAGTACAGGATTAGTTCAAAATTTTC
CTAATACAATAATATCAAAATTAATTGAAGGAAAATTCCAAGATATGTTAAACATTTCACAACACCAATG
CGTAAAAAAACAATGTCCAGAAAATTCTGGATGTTTCAGACATTTAGATGAAAGAGAAGAATGTAAATGT
TTATTAAATTACAAACAAGAAGGTGATAAATGTGTTGAAAATCCAAATCCTACTTGTAACGAAAATAATG
GTGGATGTGATGCAGATGCCAAATGTACCGAAGAAGATTCAGGTAGCAACGGAAAGAAAATCACATGTGA
ATGTACTAAACCTGATTCTTATCCACTTTTCGATGGTATTTTCTGCAGTTCCTCTAACTTCTTAGGAATA
TCATTCTTATTAATACTCATGTTAATATTATACAGTTTCATTTAA

>AB502452.1 Plasmodium falciparum msp1 gene for merozoite surface protein-1, complete cds, isolate: Tz03-086
ATGAAGATCATATTCTTTTTATGTTCATTTCTTTTTTTTATTATAAATACACAATGTGTAACACATGAAA
GTTATCAAGAACTTGTCAAAAAACTAGAAGCTTTAGAAGATGCAGTATTGACAGGTTATGGTTTATTTCA
TAAGGAAAAAATGGTATTAAAGGATGGAGCAAATACTCAAGTTGTTGCAAAGCCTGCAGATGCTGTAAGT
ACTCAAAGTGCTAAAAATCCTCCAGGTGCTACAGTACCTTCAGGTACTGCAAGTACTAAAGGTGCTATAA
GATCTCCAGGTGCTGCAAATCCTTCAGATGATTCAAGTGATTCAGATGCTAAATCTTACGCTGATTTAAA
ACATAGAGTTCAAAATTACTTGTTCACTATTAAAGAACTCAAATATCCCGAACTCTTTGATTTAACCAAT
CATATGTTAACTTTGTGTGATAATATTCATGGTTTCAAATATTTAATTGATGGATATGAAGAAATTAATG
AATTATTATATAAATTAAACTTTTATTTTGATTTATTAAGAGCAAAATTAAATGATGTATGTGCTAATGA
TTATTGTCAAATACCTTTCAATCTTAAAATTCGTGCAAATGAATTAGACGTACTTAAAAAACTTGTGTTC
GGATATAGAAAACCATTAGACAATATTAAAGATAATGTAGGAAAAATGGAAGATTACATTAAAAAAAATA
AAACAACCATAGCAAATATAAATGAATTAATTGAAGGAAGTAAGAAAACAATTGATCAAAATAAGAATGC
AGATAATGAAGAAGGAAAAAAAAAATTATACCAAGCTCAATATGATCTTTCTATTTACAATAAACAATTA
GAAGAAGCACATAATTTAATAAGCGTTTTAGAAAAACGTATTGACACTTTAAAAAAAAATGAAAACATAA
AGAAATTACTTGAAGATATAGATAAAATTAAAACAGATGCCGAAAAACCCACTACTGGAAGTAAACCAAA
TACTCTCCTTGATAAGAACAAAAAAATCGAGGAACACGAAGAAAAAATAAAAGAAATTGCCAAAACTATT
AAATTTAACATTGATAGTTTATTTACTGATCCACTTGAATTAGAATATTATTTAAGAGAAAAAAATAAAA
AAGTTGATGTAACACCTAAATCACAAGATCCTACGAAATCTGTTCAAATACCAAAAGTTCCTTATCCAAA
TGGTATTGTATATCCTTTACCACTCACTGATATTCATAATTCATTAGCTGCAGATAATGATAAAAATTCA
TATGGTGATTTAATGAATCCTAATACTAAAGAAAAAATTAATGAAAAAATTATTACAGATAATAAGGAAA
GAAAAATATTCATTAATAACATTAAAAAACAAATTGATTTAGAAGAAAAAAACATTAATCACACAAAAGA
ACAAAATAAAAAATTACTTGAAGATTATGAAAAGTCAAAAAAGGATTATGAAGAATTACTTGAAAAATTT
TATGAAATGAAATTTAATAATAATTTTAACAAAGATGTCGTAGATAAAATGTTCAGTGCAAGATATACAT
ATAATGTTGAAAAACAAAGATATAATAATAAATTTTCATCCTCTAATAATTCTGTATATAATGTTCAAAA
ATTAAAAAAGGCTCTTTCATATCTTGAAGATTATTCTTTAAGAAAAGGAATTTCTGAAAAAGATTTTAAT
CATTATTATACTTTGAAAACTGGCCTCGAAGCTGATATAAAAAAATTAACAGAAGAAATAAAGAGTAGTG
AAAACAAAATTCTAGAAAAAAATTTTAAAGGACTAACACATTCAGCAAATGCTTCCTTAGAAGTATATGA
TATTGTAAAATTACAAGTACAAAAAGTTTTATTAATTAAAAAAATAGAAGACTTAAGAAAGATAGAATTA
TTTTTAAAAAATGCACAACTAAAAGATAGTATTCATGTACCAAATATTTATAAACCACAAAATAAACCAG
AACCATATTATTTAATTGTATTAAAAAAAGAAGTAGATAAATTAAAAGAATTTATACCAAAAGTAAAAGA
CATGTTAAAGAAAGAACAAGCTGTCTTATCAAGTATTACACAACCTTTAGTTGCAGCAAGCGAAACAACT
GAAGATGGGGGTCACTCCACACACACATTATCCCAATCAGGAGAAACAGAAGTAACAGAAGAAACAGAAG
AAACAGAAGAAACAGTAGGACACACAACAACGGTAACAATAACATTACCACCAAAAGAAGTAAAAGTTGT
TGAAAATTCAATAGAACATAAGAGTAATGACAATTCACAAGCCTTGACAAAAACAGTTTATCTAAAGAAA
TTAGATGAATTTTTAACTAAATCATATATATGTCATAAATATATTTTAGTATCAAACTCTAGTATGGACC
AAAAATTATTAGAGGTATATAATCTTACTCCAGAAGAAAAAAATGAATTAAAATCATGTGATCCATTAGA
TTTATTATTTAATATTCAAAATAACATACCTGCTATGTATTCATTATATGATAGTATGAACAATGATTTA
CAACATCTCTTTTTTGAATTATATCAAAAGGAAATGATTTATTATTTACATAAACTAAAAGAGGAAAATC
ACATCAAAAAATTATTAGAGGAGCAAAAACAAATAACTGGAACATCATCTACATCCAGTCCTGGAAATAC
AACCGTAAATACTGCTCAATCCGCAACTCACAGTAATTCCCAAAACCAACAATCAAATGCATCCTCTACC
AATACCCAAAATGGTGTAGCTGTATCATCTGGTCCTGCTGTAGTTGAAGAAAGTCATGATCCCTTAACAG
TATTGTCTATTAGTAACGATTTGAAAGGTATTGTTAGTCTCTTAAATCTTGGAAATAAAACTAAAGTACC
TAATCCATTAACCATTTCTACAACAGAGATGGAAAAATTTTATGAGAATATTTTAAAAAATAATGATACC
TATTTTAATGATGATATCAAACAATTCGTAAAATCTAATTCAAAAGTAATTACAGGTTTGACCGAAACAC
AAAAAAATGCATTAAATGATGAAATTAAAAAATTAAAAGATACTTTACAGTTATCATTTGATTTATATAA
TAAATATAAATTAAAATTAGATAGATTATTTAATAAGAAAAAAGAACTTGGCCAAGACAAAATGCAAATT
AAAAAACTTACTTTATTAAAAGAACAATTAGAATCAAAATTGAATTCACTTAATAACCCACATAATGTAT
TACAAAACTTTTCTGTTTTCTTTAACAAAAAAAAAGAAGCTGAAATAGCAGAAACTGAAAACACATTAGA
AAACACAAAAATATTATTGAAACATTATAAAGGACTTGTTAAATATTATAATGGTGAATCATCTCCATTA
AAAACTTTAAGTGAAGTATCAATTCAAACAGAAGATAATTATGCCAATTTAGAAAAATTTAGAGTATTAA
GTAAAATAGATGGAAAACTCAATGATAATTTACATTTAGGAAAGAAAAAATTATCTTTCTTATCAAGTGG
ATTACATCATTTAATTACTGAATTAAAAGAAGTAATAAAAAATAAAAATTATACAGGTAATTCTCCAAGT
GAAAATAATAAGAAAGTTAACGAAGCTTTAAAATCTTACGAAAATTTTCTCCCAGAAGCAAAAGTTACAA
CAGTTGTAACTCCACCTCAACCAGATGTAACTCCATCTCCATTATCTGTAAGGGTAAGTGGTAGTTCAGG
ATCCACAAAAGAAGAAACACAAATACCAACTTCAGGCTCTTTATTAACAGAATTACAACAAGTAGTACAA
TTACAAAATTATGACGAAGAAGATGATTCCTTAGTTGTATTACCCATTTTTGGAGAATCCGAAGATAATG
ACGAATATTTAGATCAAGTAGTAACTGGAGAAGCAATATCTGTCACAATGGATAATATCCTCTCAGGATT
TGAAAATGAATATGATGTTATATATTTAAAACCTTTAGCTGGAGTATATAGAAGCTTAAAAAAACAAATT
GAAAAAAACATTTTTACATTTAATTTAAATTTGAACGATATCTTAAATTCACGTCTTAAGAAACGAAAAT
ATTTCTTAGATGTATTAGAATCTGATTTAATGCAATTTAAACATATATCCTCAAATGAATACATTATTGA
AGATTCATTTAAATTATTGAATTCAGAACAAAAAAACACACTTTTAAAAAGTTACAAATATATAAAAGAA
TCAGTAGAAAATGATATTAAATTTGCACAGGAAGGTATAAGTTATTATGAAAAGGTTTTAGCGAAATATA
AGGATGATTTAGAATCAATTAAAAAAGTTATCAAAGAAGAAAAGGAGAAGTTCCCATCATCACCACCAAC
AACACCTCCGTCACCAGCAAAAACAGACGAACAAAAGAAGGAAAGTAAGTTCCTTCCATTTTTAACAAAC
ATTGAGACCTTATACAATAACTTAGTTAATAAAATTGACGATTACTTAATTAACTTAAAGGCAAAGATTA
ACGATTGTAATGTTGAAAAAGATGAAGCACATGTTAAAATAACTAAACTTAGTGATTTAAAAGCAATTGA
TGACAAAATAGATCTTTTTAAAAACACTGACGACTTCGAAGCAATTAAAAAATTGATAAATGATGATACG
AAAAAAGATATGCTTGGCAAATTACTTAGTACAGGATTAGTTCAAAATTTTCCTAATACAATAATATCAA
AATTAATTGAAGGAAAATTCCAAGATATGTTAAACATTTCACAACACCAATGCGTAAAAAAACAATGTCC
ACAAAATTCTGGATGTTTCAGACATTTAGATGAAAGAGAAGAATGTAAATGTTTATTAAATTACAAACAA
GAAGGTGATAAATGTGTTGAAAATCCAAATCCTACTTGTAACGAAAATAATGGTGGATGTGATGCAGATG
CCAAATGTACCGAAGAAGATTCAGGTAGCAACGGAAAGAAAATCACATGTGAATGTACTAAACCTGATTC
TTATCCATTTTTCGATGGTATTTTCTGCAGTTCCTCTAACTTCTTAGGAATATCATTCTTATTAATACTC
ATGTTAATATTATACAGTTTCATTTAA

>AB502453.1 Plasmodium falciparum msp1 gene for merozoite surface protein-1, complete cds, isolate: Tz03-101
ATGAAGATCATATTCTTTTTATGTTCATTTCTTTTTTTTATTATAAATACACAATGTGTAACACATGAAA
GTTATCAAGAACTTGTCAAAAAACTAGAAGCTTTAGAAGATGCAGTATTGACAGGTTATGGTTTATTTCA
TAAGGAAAAAATGATCTTAAATGAAGAAGAAATTACTACAAAAGGTGCAAGTGCTCAAAGTGGTACAAGT
GGTACAAGTGGTCCAAGTGGTACAAGTGGTACAAGTGGTACAAGTGCTCAAAGTGGTACAAGTGGTACAA
GTGCTCAAAGTGGTACAAGTGGTACAAGTGGTACAAGTGGTACAAGTGGTACAAGTGGTCCAAGTGGTAC
AAGTCCATCATCTCGTTCAAACACTTTACCTCGTTCAAATACTTCATCTGGTGCAAGCCCTCCAGCTGAT
GCAAGCGATTCAGATGCTAAATCTTACGCTGATTTAAAACACAGAGTACGAAATTACTTGTTCACTATTA
AAGAACTCAAATATCCCGAACTCTTTGATTTAACCAATCATATGTTAACTTTGTGTGATAATATTCATGG
TTTCAAATATTTAATTGATGGATATGAAGAAATTAATGAATTATTATATAAATTAAACTTTTATTTTGAT
TTATTAAGAGCAAAATTAAATGATGTATGTGCTAATGATTATTGTCAAATACCTTTCAATCTTAAAATTC
GTGCAAATGAATTAGACGTACTTAAAAAACTTGTGTTCGGATATAGAAAACCATTAGACAATATTAAAGA
TAATGTAGGAAAAATGGAAGATTACATTAAAAAAAATAAAACAACCATAGCAAATATAAATGAATTAATT
GAAGGAAGTAAGAAAACAATTGATCAAAATAAGAATGCAGATAATGAAGAAGGAAAAAAAAAATTATACC
AAGCTCAATATGATCTTTTTATTTACAATAAACAATTACAAGAAGCACATAATTTAATAAGCGTTTTAGA
AAAACGTATTGACACTTTAAAAAAAAATGAAAACATAAAGAAATTACTTGAAGATATAGATAAAATTAAA
ACAGATGCCGAAAAACTCACTACTGGAAGTAAACCAAATACTCTCCTTGATAAGAACAAAAAAATCGAGG
AACACGAAGAAAAAATAAAAGAAATTGCCAAAACTATTAAATTTAACATTGATAGTTTATTTACTGATCC
ACTTGAATTAGAATATTATTTAAGAGAAAAAAATAAAAAAGTTGATGTAACACCTAAATCACAAGATCCT
ACGAAATCTGTTCAAATACCAAAAGTTCCTTATCCAAATGGTATTGTATATCCTTTACCACTCACTGATA
TTCATAATTCATTAGCTGCAGATAATGATAAAAATTCATATGGTGATTTAATGAATCCTGATACTAAAGA
AAAAATTAATGAAAAAATTATTACAGATAATAAGGAAAGAAAAATATTCATTAATAACATTAAAAAACAA
ATTGATTTAGAAGAAAAAAACATTAATCACACAAAAGAACAAAATAAAAAATTACTTGAAGATTATGAAA
AGTCAAAAAAGGATTATGAAGAATTACTTGAAAAATTTTATGAAATGAAATTTAATAATAATTTTGACAA
AGATGTCGTAGATAAAATGTTCAGTGCAAGATATACATATAATGTTGAAAAACAAAGATATAATAATAAA
TTTTCATCCTCTAATAATTCTGTATATAATGTTCAAAAATTAAAAAAGGCTCTTTCATATCTTGAAGATT
ATTCTTTAAGAAAAGGAATTTCTGAAAAAGATTTTAATCATTATTATACTTTGAAAACTGGCCTCGAAGC
TGATATAAAAAAATTAACAGAAGAAATAAAGAGTAGTGAAAACAAAATTCGAGAAAAAAATTTTAAAGGA
CTAACACATTCAGCAAATGCTTCCTTAGAAGTATATGATATTGTAAAATTACAAGTACAAAAAGTTTTAT
TAATTAAAAAAATAGAAGACTTAAGAAAGATAGAATTATTTTTAAAAAATGCACAACTAAAAGATAGTAT
TCATGTACCAAATATTTATAAACCACAAAATAAACCAGAACCATATTATTTAATTGTATTAAAAAAAGAA
GTAGATAAATTAAAAGAATTTATACCAAAAGTAAAAGACATGTTAAAGAAAGAACAAGCTGTCTTATCAA
GTATTACACAACCTTTAGTTGCAGCAAGCGAAACAACTGAAGATGGGGGTCACTCCACACACACATTATC
CCAATCAGGAGAAACAGAAGTAACAGAAGAAACAGAAGAAACAGTAGGACACACAACAACGGTAACAATA
ACATTACCACCAACACAACCATCACCACCAAAAGAAGTAAAAGTTGTTGAAAATTCAATAGAACATAAGA
GTAATGACAATTCACAAGCCTTGACAAAAACAGTTTATCTAAAGAAATTAGATGAATTTTTAACTAAATC
ATATATATGTCATAAATATATTTTAGTATCAAACTCTAGTATGGACCAAAAATTATTAGAGGTATATAAT
CTTACTCCAGAAGAAAAAAATGAATTAAAATCATGTGATCCATTAGATTTATTATTTAATATTCAAAATA
ACATACCTGCTATGTATTCATTATATGATAGTATGAACAATGATTTACAACATCTCTTTTTTGAATTATA
TCAAAAGGAAATGATTTATTATTTACATAAACTAAAAGAGGAAAATCACATCAAAAAATTATTAGAGGAG
CAAAAACAAATAACTGGAACATCATCTACATCCAGTCCTGGAAATACAACCGTAAATACTGCTCAATCCG
CAACTCACAGTAATTCCCAAAACCAACAATCAAATGCATCCTCTACCAATACCCAAAATGGTGTAGCTGT
ATCATCTGGTCCTGCTGTAGTTGAAGAAAGTCATGATCCCTTAACAGTATTGTCTATTAGTAACGATTTG
AAAGGTATTGTTAGTCTCTTAAATCTTGGAAATAAAACTAAAGTACCTAATCCATTAACCATTTCTACAA
CAGAGATGGAAAAATTTTATGAGAATATTTTAAAAAATAATGATACCTATTTTAATGATGATATCAAACA
ATTCGTAAAATCTAATTCAAAAGTAATTACAGGTTTGACCGAAACACAAAAAAATGCATTAAATGATGAA
ATTAAAAAATTAAAAGATACTTTACAGTTATCATTTGATTTATATAATAAATATAAATTAAAATTAGATA
GATTATTTAATAAGAAAAAAGAACTTGGCCAAGACAAAATGCAAATTAAAAAACTTACTTTATTAAAAGA
ACAATTAGAATCAAAATTGAATTCACTTAATAACCCACATAATGTATTACAAAACTTTTCTGTTTTCTTT
AACAAAAAAAAAGAAGCTGAAATAGCAGAAACTGAAAACACATTAGAAAACACAAAAATATTATTGAAAC
ATTATAAAGGACTTGTTAAATATTATAATGGTGAATCATCTCCATTAAAAACTTTAAGTGAAGTATCAAT
TCAAACAGAAGATAATTATGCCAATTTAGAAAAATTTAGAGTATTAAGTAAAATAGATGGAAAACTCAAT
GATAATTTACATTTAGGAAAGAAAAAATTATCTTTCTTATCAAGTGGATTACATCATTTAATTACTGAAT
TAAAAGAAGTAATAAAAAATAAAAATTATACAGGTAATTCTCCAAGTGAAAATAATAAGAAAGTTAACGA
AGCTTTAAAATCTTACGAAAATTTTCTCCCAGAAGCAAAAGTTACAACAGTTGTAACTCCACCTCAACCA
GATGTAACTCCATCTCCATTATCTGTAAGGGTAAGTGGTAGTTCAGGATCCACAAAAGAAGAAACACAAA
TACCAACTTCAGGCTCTTTATTAACAGAATTACAACAAGTAGTACAATTACAAAATTATGACGAAGAAGA
TGATTCCTTAGTTGTATTACCCATTTTTGGAGAATCCGAAGATAATGACGAATATTTAGATCAAGTAGTA
ACTGGAGAAGCAATATCTGTCACAATGGATAATATCCTCTCAGGATTTGAAAATGAATATGATGTTATAT
ATTTAAAACCTTTAGCTGGAGTATATAGAAGCTTAAAAAAACAAATTGAAAAAAACATTTTTACATTTAA
TTTAAATTTGAACGATATCTTAAATTCACGTCTTAAGAAACGAAAATATTTCTTAGATGTATTAGAATCT
GATTTAATGCAATTTAAACATATATCCTCAAATGAATACATTATTGAAGATTCATTTAAATTATTGAATT
CAGAACAAAAAAACACACTTTTAAAAAGTTACAAATATATAAAAGAATCAGTAGAAAATGATATTAAATT
TGCACAGGAAGGTATAAGTTATTATGAAAAGGTTTTAGCGAAATATAAGGATGATTTAGAATCAATTAAA
AAAGTTATCAAAGAAGAAAAGGAGTTCCCATCATCACCACCAACAACACCTCCGTCACCAGCAAAAACAG
ACGAACAAAAGAAGGAAAGTAAGTTCCTTCCATTTTTAACAAACATTGAGACCTTATACAATAACTTAGT
TAATAAAATTGACCATTACTTAATTAACTTAAAGGCAAAGATTAACGATTGTAATGTTGAAAAAGATGAA
GCACATGTTAAAATAACTAAACTTAGTGATTTAAAAGCAATTGATGACAAAATAGATCTTTTTAAAAACC
ATAACGACTTCGAAGCAATTAAAAAATTGATAAATGATGATACGAAAAAAGATATGCTTGGCAAATTACT
TAGTACAGGATTAGTTCAAAATTTTCCTAATACAATAATATCAAAATTAATTGAAGGAAAATTCCAAGAT
ATGTTAAACATTTCACAACACCAATGCGTAAAAAAACAATGTCCACAAAATTCTGGATGTTTCAGACATT
TAGATGAAAGAGAAGAATGTAAATGTTTATTAAATTACAAACAAGAAGGTGATAAATGTGTTGAAAATCC
AAATCCTACTTGTAACGAAAATAATGGTGGATGTGATGCAGATGCCAAATGTACCGAAGAAGATTCAGGT
AGCAACGGAAAGAAAATCACATGTGAATGTACTAAACCTGATTCTTATCCATTTTTCGATGGTATTTTCT
GCAGTTCCTCTAACTTCTTAGGAATATCATTCTTATTAATACTCATGTTAATATTATACAGTTTCATTTA
A

>AB502454.1 Plasmodium falciparum msp1 gene for merozoite surface protein-1, complete cds, isolate: Tz03-105
ATGAAGATCATATTCTTTTTATGTTCATTTCTTTTTTTTATTATAAATACACAATGTGTAACACATGAAA
GTTATCAAGAACTTGTCAAAAAACTAGAAGCTTTAGAAGATGCAGTATTGACAGGTTATAGTTTATTTCA
AAAGGAAAAAATGGTATTAAATGAAGAAGAAATTACTACAAAAGGTGCAAGTGCTCAAAGTGGTGCAAGT
GCTCAAAGTGGTACAAGTGCTCAAAGTGGTACAAGTGCTCAAAGTGGTACAAGTGGTACAAGTGGTACAA
GTGGTACAAGTGGTACAAGTGGTACAAGTGGTACAAGTGGTACAAGTGGTACAAGTGGTACAAGTGGTAC
AAGTGGTCCAAGTGGTCCAAGTGGTACAAGTCCATCATCTCGTTCAAACACTTTACCTCGTTCAAATACT
TCATCTGGTGCAAGCCCTCCAGCTGATGCAAGCGATTCAGATGCTAAATCTTACGCTGATTTAAAACACA
GAGTACGAAATTACTTGTTCACTATTAAAGAACTCAAATATCCCGAACTCTTTGATTTAACCAATCATAT
GTTAACTTTGTGTGATAATATTCATGGTTTCAAATATTTAATTGATGGATATGAAGAAATTAATGAATTA
TTATATAAATTAAACTTTTATTTTGATTTATTAAGAGCAAAATTAAATGATGTATGTGCTAATGATTATT
GTCAAATACCTTTCAATCTTAAAATTCGTGCAAATGAATTAGACGTACTTAAAAAACTTGTGTTCGGATA
TAGAAAACCATTAGACAATATTAAAGATAATGTAGGAAAAATGGAAGATTACATTAAAAAAAATAAAACA
ACCATAGCAAATATAAATGAATTAATTGAAGGAAGTAAGAAAACAATTGATCAAAATAAGAATGCAGATA
ATGAAGAAGGAAAAAAAAAATTATACCAAGCTCAATATGATCTTTCTATTTACAATAAACAATTAGAAGA
AGCACATAATTTAATAAGCGTTTTAGAAAAACGTATTGACACTTTAAAAAAAAATGAAAACATTAAGGAA
TTACTTGATAAGATAAATGAAATTAAAAATCCCCCACCGGCCAATTCTGGAAATACACCAAATACTCTCC
TTGATAAGAACAAAAAAATCGAGGAACACGAAGAAAAAATAAAAGAAATTGCCAAAACTATTAAATTTAA
CATTGATAGTTTATTTACTGATCCACTTGAATTAGAATATTATTTAAGAGAAAAAAATAAAAAAGTTGAT
GTAACACCTAAATCACAAGATCCTACGAAATCTGTTCAAATACCAAAAGTTCCTTATCCAAATGGTATTG
TATATCCTTTACCACTCACTGATATTCATAATTCATTAGCTGCAGATAATGATAAAAATTCATATGGTGA
TTTAATGAATCCTCATACTAAAGAAAAAATTAATGAAAAAATTATTACAGATAATAAGGAAAGAAAAATA
TTCATTAATAACATTAAAAAACAAATTGATTTAGAAGAAAAAAACATTAATCACACAAAAGAACAAAATA
AAAAATTACTTGAAGATTATGAAAAGTCAAAAAAGGATTATGAAGAATTACTTGAAAAATTTTATGAAAT
GAAATTTAATAATAATTTTAACAAAGATGTCGTAGATAAAATATTCAGTGCAAGATATACATATAATGTT
GAAAAACAAAGATATAATAATAAATTTTCATCCTCTAATAATTCTGTATATAATGTTCAAAAATTAAAAA
AGGCTCTTTCATATCTTGAAGATTATTCTTTAAGAAAAGGAATTTCTGAAAAAGATTTTAATCATTATTA
TACTTTGAAAACTGGCCTCGAAGCTGATATAAAAAAATTAACAGAAGAAATAAAGAGTAGTGAAAACAAA
ATTCGAGAAAAAAATTTTAAAGGACTAACACATTCAGCAAATGCTTCCTTAGAAGTATATGATATTGTAA
AATTACAAGTACAAAAAGTTTTATTAATTAAAAAAATAGAAGACTTAAGAAAGATAGAATTATTTTTAAA
AAATGCACAACTAAAAGATAGTATTCATGTACCAAATATTTATAAACCACAAAATAAACCAGAACCATAT
TATTTAATTGTATTAAAAAAAGAAGTAGATAAATTAAAAGAATTTATACCAAAAGTAAAAGACATGTTAA
AGAAAGAACAAGCTGTCTTATCAAGTATTACACAACCTTTAGTTGCAGCAAGCGAAACAACTGAAGATGG
GGGTCACTCCACACACACATTATCCCAATCAGGAGAAACAGAAGTAACAGAAGAAACAGAAGTAACAGAA
GAAACAGTAGGACACACAACAACGGTAACAATAACATTACCACCAACACAACCATCACCACCAAAAGAAG
TAAAAGTTGTTGAAAATTCAATAGAACATAAGAGTAATGACAATTCACAAGCCTTGACAAAAACAGTTTA
TCTAAAGAAATTAGATGAATTTTTAACTAAATCATATATATGTCATAAATATATTTTAGTATCAAACTCT
AGTATGGACCAAAAATTATTAGAGGTATATAATCTTACTCCAGAAGAAAAAAATGAATTAAAATCATGTG
ATCCATTAGATTTATTATTTAATATTCAAAATAACATACCTGCTATGTATTCATTATATGATAGTATGAA
CAATGATTTACAACATCTCTTTTTTGAATTATATCAAAAGGAAATGATTTATTATTTACATAAACTAAAA
GAGGAAAATCACATCAAAAAATTATTAGAGGAGCAAAAACAAATAACTGGAACATCATCTACATCCAGTC
CTGGAAATACAACCGTAAATACTGCTCAATCCGCAACTCACAGTAATTCCCAAAACCAACAATCAAATGC
ATCCTCTACCAATACCCAAAATGGTGTAGCTGTATCATCTGGTCCTGCTGTAGTTGAAGAAAGTCATGAT
CCCTTAACAGTATTGTCTATTAGTAACGATTTGAAAGGTATTGTTAGTCTCTTAAATCTTGGAAATAAAA
CTAAAGTACCTAATCCATTAACCATTTCTACAACAGAGATGGAAAAATTTTATGAGAATATTTTAAAAAA
TAATGATACCTATTTTAATGATGATATCAAACAATTCGTAAAATCTAATTCAAAAGTAATTACAGGTTTG
ACCGAAACACAAAAAAATGCATTAAATGATGAAATTAAAAAATTAAAAGATACTTTACAGTTATCATTTG
ATTTATATAATAAATATAAATTAAAATTAGATAGATTATTTAATAAGAAAAAAGAACTTGGCCAAGACAA
AATGCAAATTAAAAAACTTACTTTATTAAAAGAACAATTAGAATCAAAATTGAATTCACTTAATAACCCA
CATAATGTATTACAAAACTTTTCTGTTTTCTTTAACAAAAAAAAAGAAGCTGAAATAGCAGAAACTGAAA
ACACATTAGAAAACACAAAAATATTATTGAAACATTATAAAGGACTTGTTAAATATTATAATGGTGAATC
ATCTCCATTAAAAACTTTAAGTGAAGTATCAATTCAAACAGAAGATAATTATGCCAATTTAGAAAAATTT
AGAGTATTAAGTAAAATAGATGGAAAACTCAATGATAATTTACATTTAGGAAAGAAAAAATTATCTTTCT
TATCAAGTGGATTACATCATTTAATTACTGAATTAAAAGAAGTAATAAAAAATAAAAATTATACAGGTAA
TTCTCCAAGTGAAAATAATAAGAAAGTTAACGAAGCTTTAAAATCTTACGAAAATTTTCTCCCAGAAGCA
AAAGTTACAACAGTTGTAACTCCACCTCAACCAGATGTAACTCCATCTCCATTATCTGTAAGGGTAAGTG
GTAGTTCAGGATCCACAAAAGAAGAAACACAAATACCAACTTCAGGCTCTTTATTAACAGAATTACAACA
AGTAGTACAATCACAAAATTATGACGAAGAAGATGATTCCTTAGTTGTATTACCCATTTTTGGAGAATCC
GAAGATAATGACGAATATTTAGATCAAGTAGTAACTGGAGAAGCAATATCTGTCACAATGGATAATATCC
TCTCAGGATTTGAAAATGAATATGATGTTATATATTTAAAACCTTTAGCTGGAGTATATAGAAGCTTAAA
AAAACAAATTGAAAAAAACATTTTTACATTTAATTTAAATTTGAACGATATCTTAAATTCACGTCTTAAG
AAACGAAAATATTTCTTAGATGTATTAGAATCTGATTTAATGCAATTTAAACATATATCCTCAAATGAAT
ACATTATTGAAGATTCATTTAAATTATTGAATTCAGAACAAAAAAACACACTTTTAAAAAGTTACAAATA
TATAAAAGAATCAGTAGAAAATGATATTAAATTTGCACAGGAAGGTATAAGTTATTATGAAAAGGTTTTA
GCGAAATATAAGGATGATTTAGAATCAATTAAAAAAGTTATCAAAGAAGAAAAGGAGAAGTTCCCATCAT
CACCACCAACAACACCTCCGTCACCAGCAAAAACAGACGAACAAAAGAAGGAAAGTAAGTTCCTTCCATT
TTTAACAAACATTGAGACCTTATACAATAACTTAGTTAATAAAATTGACCATTACTTAATTAACTTAAAG
GCAAAGATTAACGATTGTAATGTTGAAAAAAATGAAGCACATGTTAAAATAACTAAACTTAGTGATTTAA
AAGCAATTGATGACAAAATAGATCTTTTTAAAAACCATAACGACTTCGAAGCAATTAAAAAATTGATAAA
TGATGATACGAAAAAAGATATGCTTGGCAAATTACTTAGTACAGGATTAGTTCAAAATTTTCCTAATACA
ATAATATCAAAATTAATTGAAGGAAAATTCCAAGATATGTTAAACATTTCACAACACCAATGCGTAAAAA
AACAATGTCCACAAAATTCTGGATGTTTCAGACATTTAGATGAAAGAGAAGAATGTAAATGTTTATTAAA
TTACAAACAAGAAGGTGATAAATGTGTTGAAAATCCAAATCCTACTTGTAACGAAAATAATGGTGGATGT
GATGCAGATGCCAAATGTACCGAAGAAGATTCAGGTAGCAACGGAAAGAAAATCACATGTGAATGTACTA
AACCTGATTCTTATCCACTTTTCGATGGTATTTTCTGCAGTTCCTCTAACTTCTTAGGAATATCATTCTT
ATTAATACTCATGTTAATATTATACAGTTTCATTTAA

>AB502455.1 Plasmodium falciparum msp1 gene for merozoite surface protein-1, complete cds, isolate: Tz98-003
ATGAAGATCATATTCTTTTTATGTTCATTTCTTTTTTTTATTATAAATACACAATGTGTAACACATGAAA
GTTATCAAGAACTTGTCAAAAAACTAGAAGCTTTAGAAGATGCAGTATTGACAGGTTATGGTTTATTTCA
TAAGGAAAAAATGATCTTAAATGAAGAAGAAATTACTACAAAAGGTGCAAGTGCTCAAAGTGGTACAAGT
GGTACAAGTGGTACAAGTGGTACAAGTGGTACAAGTGGTACAAGTGGTACAAGTGGTACAAGTGGTACAA
GTGGTACAAGTGGTACAAGTGGTACAAGTGGTCCAAGTGGTCCAAGTGGTACAAGTCCATCATCTCGTTC
AAACACTTTACCTCGTTCAAATACTTCATCTGGTGCAAGCCCTCCAGCTGATGCAAGCGATTCAGATGCT
AAATCTTACGCTGATTTAAAACACAGAGTACGAAATTACTTGTTCACTATTAAAGAACTCAAATATCCCG
AACTCTTTGATTTAACCAATCATATGTTAACTTTGTGTGATAATATTCATGGTTTCAAATATTTAATTGA
TGGATATGAAGAAATTAATGAATTATTATATAAATTAAACTTTTATTTTGATTTATTAAGAGCAAAATTA
AATGATGTATGTGCTAATGATTATTGTCAAATACCTTTCAATCTTAAAATTCGTGCAAATGAATTAGACG
TACTTAAAAAACTTGTGTTCGGATATAGAAAACCATTAGACAATATTAAAGATAATGTAGGAAAAATGGA
AGATTACATTAAAAAAAATAAAACAACCATAGCAAATATAAATGAATTAATTGAAGGAAGTAAGAAAACA
ATTGATCAAAATAAGAATGCAGATAATGAAGAAGGAAAAAAAAAATTATACCAAGCTCAATATGATCTTT
TTATTTACAATAAACAATTACAAGAAGCACATAATTTAATAAGCGTTTTAGAAAAACGTATTGACACTTT
AAAAAAAAATGAAAACATAAAGAAATTACTTGAAGATATAGATAAAATTAAAACAGATGCCGAAAAATCC
ACTACTGGAAGTAAACCAAATACTCTCCTTGATAAGAACAAAAAAATCGAGGAACACGAAGAAAAAATAA
AAGAAATTGCCAAAACTATTAAATTTAACATTGATAGTTTATTTACTGATCCACTTGAATTAGAATATTA
TTTAAGAGAAAAAAATAAAAAAGTTGATGTAACACCTAAATCACAAGATCCTACGAAATCTGTTCAAATA
CCAAAAGTTCCTTATCCAAATGGTATTGTATATCCTTTACCACTCACTGATATTCATAATTCATTAGCTG
CAGATAATGATAAAAATTCATATGGTGATTTAATGAATCCTCATACTAAAGAAAAAATTAATGAAAAAAT
TATTACAGATAATAAGGAAAGAAAAATATTCATTAATAACATTAAAAAACAAATTGATTTAGAAGAAAAA
AACATTAATCACACAAAAGAACAAAATAAAAAATTACTTGAAGATTATGAAAAGTCAAAAAAGGATTATG
AAGAATTACTTGAAAAATTTTATGAAATGAAATTTAATAATAATTTTAACAAAGATGTCGTAGATAAAAT
GTTCAGTGCAAGATATACATATAATGTTGAAAAACAAAGATATAATAATAAATTTTCATCCTCTAATAAT
TCTGTATATAATGTTCAAAAATTAAAAAAGGCTCTTTCATATCTTGAAGATTATTCTTTAAGAAAAGGAA
TTTCTGAAAAAGATTTTAATCATTATTATACTTTGAAAACTGGCCTCGAAGCTGATATAAAAAAATTAAC
AGAAGAAATAAAGAGTAGTGAAAACAAAATTCTAGAAAAAAATTTTAAAGGACTAACACATTCAGCAAAT
GCTTCCTTAGAAGTATATGATATTGTAAAATTACAAGTACAAAAAGTTTTATTAATTAAAAAAATAGAAG
ACTTAAGAAAGATAGAATTATTTTTAAAAAATGCACAACTAAAAGATAGTATTCATGTACCAAATATTTA
TAAACCACAAAATAAACCAGAACCATATTATTTAATTGTATTAAAAAAAGAAGTAGATAAATTAAAAGAA
TTTATACCAAAAGTAAAAGACATGTTAAAGAAAGAACAAGCTGTCTTATCAAGTATTACACAACCTTTAG
TTGCAGCAAGCGAAACAACTGAAGATGGGGGTCACTCCACACACACATTATCCCAATCAGGAGAAACAGA
AGTAACAGAAGAAACAGAAGAAACAGAAGAAACAGTAGGACACACAACAACGGTAACAATAACATTACCA
CCAACACAACCATCACCACCAAAAGAAGTAAAAGTTGTTGAAAATTCAATAGAACATAAGAGTAATGACA
ATTCACAAGCCTTGACAAAAACAGTTTATCTAAAGAAATTAGATGAATTTTTAACTAAATCATATATATG
TCATAAATATATTTTAGTATCAAACTCTAGTATGGACCAAAAATTATTAGAGGTATATAATCTTACTCCA
GAAGAAAAAAATGAATTAAAATCATGTGATCCATTAGATTTATTATTTAATATTCAAAATAACATACCTG
CTATGTATTCATTATATGATAGTATGAACAATGATTTACAACATCTCTTTTTTGAATTATATCAAAAGGA
AATGATTTATTATTTACATAAACTAAAAGAGGAAAATCACATCAAAAAATTATTAGAGGAGCAAAAACAA
ATAACTGGAACATCATCTACATCCAGTCCTGGAAATACAACCGTAAATACTGCTCAATCCGCAACTCACA
GTAATTCCCAAAACCAACAATCAAATGCATCCTCTACCAATACCCAAAATGGTGTAGCTGTATCATCTGG
TCCTGCTGTAGTTGAAGAAAGTCATGATCCCTTAACAGTATTGTCTATTAGTAACGATTTGAAAGGTATT
GTTAGTCTCTTAAATCTTGGAAATAAAACTAAAGTACCTAATCCATTAACCATTTCTACAACAGAGATGG
AAAAATTTTATGAGAATATTTTAAAAAATAATGATACCTATTTTAATGATGATATCAAACAATTCGTAAA
ATCTAATTCAAAAGTAATTACAGGTTTGACCGAAACACAAAAAAATGCATTAAATGATGAAATTAAAAAA
TTAAAAGATACTTTACAGTTATCATTTGATTTATATAATAAATATAAATTAAAATTAGATAGATTATTTA
ATAAGAAAAAAGAACTTGGCCAAGACAAAATGCAAATTAAAAAACTTACTTTATTAAAAGAACAATTAGA
ATCAAAATTGAATTCACTTAATAACCCACATAATGTATTACAAAACTTTTCTGTTTTCTTTAACAAAAAA
AAAGAAGCTGAAATAGCAGAAACTGAAAACACATTAGAAAACACAAAAATATTATTGAAACATTATAAAG
GACTTGTTAAATATTATAATGGTGAATCATCTCCATTAAAAACTTTAAGTGAAGTATCAATTCAAACAGA
AGATAATTATGCCAATTTAGAAAAATTTAGAGTATTAAGTAAAATAGATGGAAAACTCAATGATAATTTA
CATTTAGGAAAGAAAAAATTATCTTTCTTATCAAGTGGATTACATCATTTAATTACTGAATTAAAAGAAG
TAATAAAAAATAAAAATTATACAGGTAATTCTCCAAGTGAAAATAATAAGAAAGTTAACGAAGCTTTAAA
ATCTTACGAAAATTTTCTCCCAGAAGCAAAAGTTACAACAGTTGTAACTCCACCTCAACCAGATGTAACT
CCATCTCCATTATCTGTAAGGGTAAGTGGTAGTTCAGGATCCACAAAAGAAGAAACACAAATACCAACTT
CAGGCTCTTTATTAACAGAATTACAACAAGTAGTACAATTACAAAATTATGACGAAGAAGATGATTCCTT
AGTTGTATTACCCATTTTTGGAGAATCCGAAGATAATGACGAATATTTAGATCAAGTAGTAACTGGAGAA
GCAATATCTGTCACAATGGATAATATCCTCTCAGGATTTGAAAATGAATATGATGTTATATATTTAAAAC
CTTTAGCTGGAGTATATAGAAGCTTAAAAAAACAAATTGAAAAAAACATTTTTACATTTAATTTAAATTT
GAACGATATCTTAAATTCACGTCTTAAGAAACGAAAATATTTCTTAGATGTATTAGAATCTGATTTAATG
CAATTTAAACATATATCCTCAAATGAATACATTATTGAAGATTCATTTAAATTATTGAATTCAGAACAAA
AAAACACACTTTTAAAAAGTTACAAATATATAAAAGAATCAGTAGAAAATGATATTAAATTTGCACAGGA
AGGTATAAGTTATTATGAAAAGGTTTTAGCGAAATATAAGGATGATTTAGAATCAATTAAAAAAGTTATC
AAAGAAGAAAAGGAGAAGTTCCCATCATCACCACCAACAACACCTCCGTCACCAGCAAAAACAGACGAAC
AAAAGAAGGAAAGTAAGTACCTTCCATTTTTAACAAACATTGAGACCTTATACAATAACTTAGTTAATAA
AATTGACGATTACTTAATTAACTTAAAGGCAAAGATTAACGATTGTAATGTTGAAAAAGATGAAGCACAT
GTTAAAATAACTAAACTTAGTGATTTAAAAGCAATTGATGACAAAATAGATCTTTTTAAAAACCATAACG
ACTTCGAAGCAATTAAAAAATTGATAAATGATGATACGAAAAAAGATATGCTTGGCAAATTACTTAGTAC
AGGATTAGTTCAAAATTTTCCTAATACAATAATATCAAAATTAATTGAAGGAAAATTCCAAGATATGTTA
AACATTTCACAACACCAATGCGTAAAAAAACAATGTCCAGAAAATTCTGGATGTTTCAGACATTTAGATG
AAAGAGAAGAATGTAAATGTTTATTAAATTACAAACAAGAAGGTGATAAATGTGTTGAAAATCCAAATCC
TACTTGTAACGAAAATAATGGTGGATGTGATGCAGATGCCAAATGTACCGAAGAAGATTCAGGTAGCAAC
GGAAAGAAAATCACATGTGAATGTACTAAACCTGATTCTTATCCACTTTTCGATGGTATTTTCTGCAGTT
CCTCTAACTTCTTAGGAATATCATTCTTATTAATACTCATGTTAATATTATACAGTTTCATTTAA

>AB502456.1 Plasmodium falciparum msp1 gene for merozoite surface protein-1, complete cds, isolate: Tz98-009
ATGAAGATCATATTCTTTTTATGTTCATTTCTTTTTTTTATTATAAATACACAATGTGTAACACATGAAA
GTTATCAAGAACTTGTCAAAAAACTAGAAGCTTTAGAAGATGCAGTATTGACAGGTTATGGTTTATTTCA
TAAGGAAAAAATGATCTTAAATGAAGAAGAAATTACTACAAAAGGTGCAAGTGCTCAAAGTGGTACAAGT
GGTACAAGTGGTACAAGTGGTACAAGTGGTACAAGTGGTACAAGTGGTACAAGTGGTACAAGTGGTACAA
GTGGTACAAGTGGTACAAGTGGTACAAGTGGTCCAAGTGGTCCAAGTGGTACAAGTCCATCATCTCGTTC
AAACACTTTACCTCGTTCAAATACTTCATCTGGTGCAAGCCCTCCAGCTGATGCAAGCGATTCAGATGCT
AAATCTTACGCTGATTTAAAACACAGAGTACGAAATTACTTGTTCACTATTAAAGAACTCAAATATCCCG
AACTCTTTGATTTAACCAATCATATGTTAACTTTGTGTGATAATATTCATGGTTTCAAATATTTAATTGA
TGGATATGAAGAAATTAATGAATTATTATATAAATTAAACTTTTATTTTGATTTATTAAGAGCAAAATTA
AATGATGTATGTGCTAATGATTATTGTCAAATACCTTTCAATCTTAAAATTCGTGCAAATGAATTAGACG
TACTTAAAAAACTTGTGTTCGGATATAGAAAACCATTAGACAATATTAAAGATAATGTAGGAAAAATGGA
AGATTACATTAAAAAAAATAAAACAACCATAGCAAATATAAATGAATTAATTGAAGGAAGTAAGAAAACA
ATTGATCAAAATAAGAATGCAGATAATGAAGAAGGAAAAAAAAAATTATACCAAGCTCAATATGATCTTT
CTATTTACAATAAACAATTAGAAGAAGCACATAATTTAATAAGCGTTTTAGAAAAACGTATTGACACTTT
AAAAAAAAATGAAAACATAAAGAAATTACTTGAAGATATAGATAAAATTAAAACAGATGCCGAAAAACTC
ACTACTGGAAGTAAACCAAATACTCTCCTTGATAAGAACAAAAAAATCGAGGAACACGAAGAAAAAATAA
AAGAAATTGCCAAAACTATTAAATTTAACATTGATAGTTTATTTACTGATCCACTTGAATTAGAATATTA
TTTAAGAGAAAAAAATAAAAAAGTTGATGTAACACCTAAATCACAAGATCCTACGAAATCTGTTCAAATA
CCAAAAGTTCCTTATCCAAATGGTATTGTATATCCTTTACCACTCACTGATATTCATAATTCATTAGCTG
CAGATAATGATAAAAATTCATATGGTGATTTAATGAATCCTGGTACTAAAGAAAAAATTAATGAAAAAAT
TATTACAGATAATAAGGAAAGAAAAATATTCATTAATAACATTAAAAAACAAATTGATTTAGAAGAAAAA
AACATTAATCACACAAAAGAACAAAATAAAAAATTACTTGAAGATTATGAAAAGTCAAAAAAGGATTATG
AAGAATTACTTGAAAAATTTTATGAAATGAAATTTAATAATAATTTTGACAAAGATGTCGTAGATAAAAT
GTTCAGTGCAAGATATACATATAATGTTGAAAAACAAAGATATAATAATAAATTTTCATCCTCTAATAAT
TCTGTATATAATGTTCAAAAATTAAAAAAGGCTCTTTCATATCTTGAAGATTATTCTTTAAGAAAAGGAA
TTTCTGAAAAAGATTTTAATCATTATTATACTTTGAAAACTGGCCTCGAAGCTGATATAAAAAAATTAAC
AGAAGAAATAAAGAGTAGTGAAAACAAAATTCTAGAAAAAAATTTTAAAGGACTAACACATTCAGCAAAT
GCTTCCTTAGAAGTATATGATATTGTAAAATTACAAGTACAAAAAGTTTTATTAATTAAAAAAATAGAAG
ACTTAAGAAAGATAGAATTATTTTTAAAAAATGCACAACTAAAAGATAGTATTCATGTACCAAATATTTA
TAAACCACAAAATAAACCAGAACCATATTATTTAATTGTATTAAAAAAAGAAGTAGATAAATTAAAAGAA
TTTATACCAAAAGTAAAAGACATGTTAAAGAAAGAACAAGCTGTCTTATCAAGTATTACACAACCTTTAG
TTGCAGCAAGCGAAACAACTGAAGATGGGGGTCACTCCACACACACATTATCCCAATCAGGAGAAACAGA
AGTAACAGAAGAAACAGAAGAAACAGAAGAAACAGTAGGACACACAACAACGGTAACAATAACATTACCA
CCAACACAACCATCACCACCAAAAGAAGTAAAAGTTGTTGAAAATTCAATAGAACATAAGAGTAATGACA
ATTCACAAGCCTTGACAAAAACAGTTTATCTAAAGAAATTAGATGAATTTTTAACTAAATCATATATATG
TCATAAATATATTTTAGTATCAAACTCTAGTATGGACCAAAAATTATTAGAGGTATATAATCTTACTCCA
GAAGAAAAAAATGAATTAAAATCATGTGATCCATTAGATTTATTATTTAATATTCAAAATAACATACCTG
CTATGTATTCATTATATGATAGTATGAACAATGATTTACAACATCTCTTTTTTGAATTATATCAAAAGGA
AATGATTTATTATTTACATAAACTAAAAGAGGAAAATCACATCAAAAAATTATTAGAGGAGCAAAAACAA
ATAACTGGAACATCATCTACATCCAGTCCTGGAAATACAACCGTAAATACTGCTCAATCCGCAACTCACA
GTAATTCCCAAAACCAACAATCAAATGCATCCTCTACCAATACCCAAAATGGTGTAGCTGTATCATCTGG
TCCTGCTGTAGTTGAAGAAAGTCATGATCCCTTAACAGTATTGTCTATTAGTAACGATTTGAAAGGTATT
GTTAGTCTCTTAAATCTTGGAAATAAAACTAAAGTACCTAATCCATTAACCATTTCTACAACAGAGATGG
AAAAATTTTATGAGAATATTTTAAAAAATAATGATACCTATTTTAATGATGATATCAAACAATTCGTAAA
ATCTAATTCAAAAGTAATTACAGGTTTGACCGAAACACAAAAAAATGCATTAAATGATGAAATTAAAAAA
TTAAAAGATACTTTACAGTTATCATTTGATTTATATAATAAATATAAATTAAAATTAGATAGATTATTTA
ATAAGAAAAAAGAACTTGGCCAAGACAAAATGCAAATTAAAAAACTTACTTTATTAAAAGAACAATTAGA
ATCAAAATTGAATTCACTTAATAACCCACATAATGTATTACAAAACTTTTCTGTTTTCTTTAACAAAAAA
AAAGAAGCTGAAATAGCAGAAACTGAAAACACATTAGAAAACACAAAAATATTATTGAAACATTATAAAG
GACTTGTTAAATATTATAATGGTGAATCATCTCCATTAAAAACTTTAAGTGAAGTATCAATTCAAACAGA
AGATAATTATGCCAATTTAGAAAAATTTAGAGTATTAAGTAAAATAGATGGAAAACTCAATGATAATTTA
CATTTAGGAAAGAAAAAATTATCTTTCTTATCAAGTGGATTACATCATTTAATTACTGAATTAAAAGAAG
TAATAAAAAATAAAAATTATACAGGTAATTCTCCAAGTGAAAATAATAAGAAAGTTAACGAAGCTTTAAA
ATCTTACGAAAATTTTCTCCCAGAAGCAAAAGTTACAACAGTTGTAACTCCACCTCAACCAGATGTAACT
CCATCTCCATTATCTGTAAGGGTAAGTGGTAGTTCAGGATCCACAAAAGAAGAAACACAAATACCAACTT
CAGGCTCTTTATTAACAGAATTACAACAAGTAGTACAATCACAAAATTATGACGAAGAAGATGATTCCTT
AGTTGTATTACCCATTTTTGGAGAATCCGAAGATAATGACGAATATTTAGATCAAGTAGTAACTGGAGAA
GCAATATCTGTCACAATGGATAATATCCTCTCAGGATTTGAAAATGAATATGATGTTATATATTTAAAAC
CTTTAGCTGGAGTATATAGAAGCTTAAAAAAACAAATTGAAAAAAACATTTTTACATTTAATTTAAATTT
GAACGATATCTTAAATTCACGTCTTAAGAAACGAAAATATTTCTTAGATGTATTAGAATCTGATTTAATG
CAATTTAAACATATATCCTCAAATGAATACATTATTGAAGATTCATTTAAATTATTGAATTCAGAACAAA
AAAACACACTTTTAAAAAGTTACAAATATATAAAAGAATCAGTAGAAAATGATATTAAATTTGCACAGGA
AGGTATAAGTTATTATGAAAAGGTTTTAGCGAAATATAAGGATGATTTAGAATCAATTAAAAAAGTTATC
AAAGAAGAAAAGGAGAAGTTCCCATCATCACCACCAACAACACCTCCGTCACCAGCAAAAACAGACGAAC
AAAAGAAGGAAAGTAAGTTCCTTCCATTTTTAACAAACATTGAGACCTTATACAATAACTTAGTTAATAA
AATTGACGATTACTTAATTAACTTAAAGGCAAAGATTAACGATTGTAATGTTGAAAAAAATGAAGCACAT
GTTAAAATAACTAAACTTAGTGATTTAAAAGCAATTGATGACAAAATAGATCTTTTTAAAAACCATAACG
ACTTCGAAGCAATTAAAAAATTGATAAATGATGATACGAAAAAAGATATGCTTGGCAAATTACTTAGTAC
AGGATTAGTTCAAAATTTTCCTAATACAATAATATCAAAATTAATTGAAGGAAAATTCCAAGATATGTTA
AACATTTCACAACACCAATGCGTAAAAAAACAATGTCCACAAAATTCTGGATGTTTCAGACATTTAGATG
AAAGAGAAGAATGTAAATGTTTATTAAATTACAAACAAGAAGGTGATAAATGTGTTGAAAATCCAAATCC
TACTTGTAACGAAAATAATGGTGGATGTGATGCAGATGCCAAATGTACCGAAGAAGATTCAGGTAGCAAC
GGAAAGAAAATCACATGTGAATGTACTAAACCTGATTCTTATCCACTTTTCGATGGTATTTTCTGCAGTT
CCTCTAACTTCTTAGGAATATCATTCTTATTAATACTCATGTTAATATTATACAGTTTCATTTAA

>AB502457.1 Plasmodium falciparum msp1 gene for merozoite surface protein-1, complete cds, isolate: Tz98-017
ATGAAGATCATATTCTTTTTATGTTCATTTCTTTTTTTTATTATAAATACACAATGTGTAACACATGAAA
GTTATCAAGAACTTGTCAAAAAACTAGAAGCTTTAGAAGATGCAGTATTGACAGGTTATAGTTTATTTCA
AAAGGAAAAAATGATCTTAAATGAAGAAGAAATTACTACAAAAGGTGCAAGTGCTCAAAGTGGTACAAGT
GGTCCAAGTGGTCCAAGTGGTCCAAGTGGTCCAAGTGGTCCAAGTGGTCCAAGTGGTCCAAGTGGTCCAA
GTGGTACAAGTCCATCATCTCGTTCAAACACTTTACCTCGTTCAAATACTTCATCTGGTGCAAGCCCTCC
AGCTGATGCAAGCGATTCAGATGCTAAATCTTACGCTGATTTAAAACACAGAGTACGAAATTACTTGTTC
ACTATTAAAGAACTCAAATATCCCGAACTCTTTGATTTAACCAATCATATGTTAACTTTGTGTGATAATA
TTCATGGTTTCAAATATTTAATTGATGGATATGAAGAAATTAATGAATTATTATATAAATTAAACTTTTA
TTTTGATTTATTAAGAGCAAAATTAAATGATGTATGTGCTAATGATTATTGTCAAATACCTTTCAATCTT
AAAATTCGTGCAAATGAATTAGACGTACTTAAAAAACTTGTGTTCGGATATAGAAAACCATTAGACAATA
TTAAAGATAATGTAGGAAAAATGGAAGATTACATTAAAAAAAATAAAACAACCATAGCAAATATAAATGA
ATTAATTGAAGGAAGTAAGAAAACAATTGATCAAAATAAGAATGCAGATAATGAAGAAGGAAAAAAAAAA
TTATACCAAGCTCAATATGATCTTTTTATTTACAATAAACAATTACAAGAAGCACATAATTTAATAAGCG
TTTTAGAAAAACGTATTGACACTTTAAAAAAAAATGAAAACATAAAGAAATTACTTGAAGATATAGATAA
AATTAAAACAGATGCCGAAAAACTCACTACTGGAAGTAAACCAAATCCTCTCCCTGAGAATAAGAAAAAA
GAAGTCGAGGGACACGAAGAAAAAATAAAAGAAATTGCCAAAACTATTAAATTTAACATTGATAGTTTAT
TTACTGATCCACTTGAATTAGAATATTATTTAAGAGAAAAAAATAAAAAAGTTGATGTAACACCTAAATC
ACAAGATCCTACGAAATCTGTTCAAATACCAAAAGTTCCTTATCCAAATGGTATTGTATATCCTTTACCA
CTCACTGATATTCATAATTCATTAGCTGCAGATAATGATAAAAATTCATATGGTGATTTAATGAATCCTG
ATACTAAAGAAAAAATTAATGAAAAAATTATTACAGATAATAAGGAAAGAAAAATATTCATTAATAACAT
TAAAAAACAAATTGATTTAGAAGAAAAAAACATTAATCACACAAAAGAACAAAATAAAAAATTACTTGAA
GATTATGAAAAGTCAAAAAAGGATTATGAAGAATTACTTGAAAAATTTTATGAAATGAAATTTAATAATA
ATTTTAACAAAGATGTCGTAGATAAAATGTTCAGTGCAAGATATACATATAATGTTGAAAAACAAAGATA
TAATAATAAATTTTCATCCTCTAATAATTCTGTATATAATGTTCAAAAATTAAAAAAGGCTCTTTCATAT
CTTGAAGATTATTCTTTAAGAAAAGGAATTTCTGAAAAAGATTTTAATCATTATTATACTTTGAAAACTG
GCCTCGAAGCTGATATAAAAAAATTAACAGAAGAAATAAAGAGTAGTGAAAACAAAATTCTAGAAAAAAA
TTTTAAAGGACTAACACATTCAGCAAATGCTTCCTTAGAAGTATCTGATATTGTAAAATTACAAGTACAA
AAAGTTTTATTAATTAAAAAAATAGAAGACTTAAGAAAGATAGAATTATTTTTAAAAAATGCACAACTAA
AAGATAGTATTCATGTACCAAATATTTATAAACCACAAAATAAACCAGAACCATATTATTTAATTGTATT
AAAAAAAGAAGTAGATAAATTAAAAGAATTTATACCAAAAGTAAAAGACATGTTAAAGAAAGAACAAGCT
GTCTTATCAAGTATTACACAACCTTTAGTTGCAGCAAGCGAAACAACTGAAGATGGGGGTCACTCCACAC
ACACATTATCCCAATCAGGAGAAACAGAAGTAACAGAAGAAACAGAAGAAACAGAAGAAACAGTAGGACA
CACAACAACGGTAACAATAACATTACCACCAACACAACCATCACCACCAAAAGAAGTAAAAGTTGTTGAA
AATTCAATAGAACATAAGAGTAATGACAATTCACAAGCCTTGACAAAAACAGTTTATCTAAAGAAATTAG
ATGAATTTTTAACTAAATCATATATATGTCATAAATATATTTTAGTATCAAACTCTAGTATGGACCAAAA
ATTATTAGAGGTATATAATCTTACTCCAGAAGAAAAAAATGAATTAAAATCATGTGATCCATTAGATTTA
TTATTTAATATTCAAAATAACATACCTGCTATGTATTCATTATATGATAGTATGAACAATGATTTACAAC
ATCTCTTTTTTGAATTATATCAAAAGGAAATGATTTATTATTTACATAAACTAAAAGAGGAAAATCACAT
CAAAAAATTATTAGAGGAGCAAAAACAAATAACTGGAACATCATCTACATCCAGTCCTGGAAATACAACC
GTAAATACTGCTCAATCCGCAACTCACAGTAATTCCCAAAACCAACAATCAAATGCATCCTCTACCAATA
CCCAAAATGGTGTAGCTGTATCATCTGGTCCTGCTGTAGTTGAAGAAAGTCATGATCCCTTAACAGTATT
GTCTATTAGTAACGATTTGAAAGGTATTGTTAGTCTCTTAAATCTTGGAAATAAAACTAAAGTACCTAAT
CCATTAACCATTTCTACAACAGAGATGGAAAAATTTTATGAGAATATTTTAAAAAATAATGATACCTATT
TTAATGATGATATCAAACAATTCGTAAAATCTAATTCAAAAGTAATTACAGGTTTGACCGAAACACAAAA
AAATGCATTAAATGATGAAATTAAAAAATTAAAAGATACTTTACAGTTATCATTTGATTTATATAATAAA
TATAAATTAAAATTAGATAGATTATTTAATAAGAAAAAAGAACTTGGCCAAGACAAAATGCAAATTAAAA
AACTTACTTTATTAAAAGAACAATTAGAATCAAAATTGAATTCACTTAATAACCCACATAATGTATTACA
AAACTTTTCTGTTTTCTTTAACAAAAAAAAAGAAGCTGAAATAGCAGAAACTGAAAACACATTAGAAAAC
ACAAAAATATTATTGAAACATTATAAAGGACTTGTTAAATATTATAATGGTGAATCATCTCCATTAAAAA
CTTTAAGTGAAGTATCAATTCAAACAGAAGATAATTATGCCAATTTAGAAAAATTTAGAGTATTAAGTAA
AATAGATGGAAAACTCAATGATAATTTACATTTAGGAAAGAAAAAATTATCTTTCTTATCAAGTGGATTA
CATCATTTAATTACTGAATTAAAAGAAGTAATAAAAAATAAAAATTATACAGGTAATTCTCCAAGTGAAA
ATAATAAGAAAGTTAACGAAGCTTTAAAATCTTACGAAAATTTTCTCCCAGAAGCAAAAGTTACAACAGT
TGTAACTCCACCTCAACCAGATGTAACTCCATCTCCATTATCTGTAAGGGTAAGTGGTAGTTCAGGATCC
ACAAAAGAAGAAACACAAATACCAACTTCAGGCTCTTTATTAACAGAATTACAACAAGTAGTACAATCAC
AAAATTATGACGAAGAAGATGATTCCTTAGTTGTATTACCCATTTTTGGAGAATCCGAAGATAATGACGA
ATATTTAGATCAAGTAGTAACTGGAGAAGCAATATCTGTCACAATGGATAATATCCTCTCAGGATTTGAA
AATGAATATGATGTTATATATTTAAAACCTTTAGCTGGAGTATATAGAAGCTTAAAAAAACAAATTGAAA
AAAACATTTTTACATTTAATTTAAATTTGAACGATATCTTAAATTCACGTCTTAAGAAACGAAAATATTT
CTTAGATGTATTAGAATCTGATTTAATGCAATTTAAACATATATCCTCAAATGAATACATTATTGAAGAT
TCATTTAAATTATTGAATTCAGAACAAAAAAACACACTTTTAAAAAGTTACAAATATATAAAAGAATCAG
TAGAAAATGATATTAAATTTGCACAGGAAGGTATAAGTTATTATGAAAAGGTTTTAGCGAAATATAAGGA
TGATTTAGAATCAATTAAAAAAGTTATCAAAGAAGAAAAGGAGAAGTTCCCATCATCACCACCAACAACA
CCTCCGTCACCAGCAAAAACAGACGAACAAAAGAAGGAAAGTAAGTTCCTTCCATTTTTAACAAACATTG
AGACCTTATACAATAACTTAGTTAATAAAATTGACGATTACTTAATTAACTTAAAGGCAAAGATTAACGA
TTGTAATGTTGAAAAAAATGAAGCACATGTTAAAATAACTAAACTTAGTGATTTAAAAGCAATTGATGAC
AAAATAGATCTTTTTAAAAACCATAACGACTTCGAAGCAATTAAAAAATTGATAAATGATGATACGAAAA
AAGATATGCTTGGCAAATTACTTAGTACAGGATTAGTTCAAAATTTTCCTAATACAATAATATCAAAATT
AATTGAAGGAAAATTCCAAGATATGTTAAACATTTCACAACACCAATGCGTAAAAAAACAATGTCCAGAA
AATTCTGGATGTTTCAGACATTTAGATGAAAGAGAAGAATGTAAATGTTTATTAAATTACAAACAAGAAG
GTGATAAATGTGTTGAAAATCCAAATCCTACTTGTAACGAAAATAATGGTGGATGTGATGCAGATGCCAA
ATGTACCGAAGAAGATTCAGGTAGCAACGGAAAGAAAATCACATGTGAATGTACTAAACCTGATTCTTAT
CCACTTTTCGATGGTATTTTCTGCAGTTCCTCTAACTTCTTAGGAATATCATTCTTATTAATACTCATGT
TAATATTATACAGTTTCATTTAA

>AB502458.1 Plasmodium falciparum msp1 gene for merozoite surface protein-1, complete cds, isolate: Tz98-020
ATGAAGATCATATTCTTTTTATGTTCATTTCTTTTTTTTATTATAAATACACAATGTGTAACACATGAAA
GTTATCAAGAACTTGTCAAAAAACTAGAAGCTTTAGAAGATGCAGTATTGACAGGTTATAGTTTATTTCA
AAAGGAAAAAATGGTATTAAATGAAGAAGAAATTACTACAAAAGGTGCAAGTGCTCAAAGTGGTACAAGT
GGTACAAGTGGTACAAGTGGTCCAAGTGGTACAAGTGGTCCAAGTGGTACAAGTGGTACAAGTGGTACAA
GTGGTACAAGTGGTCCAAGTCCATCATCTCGTTCAAACACTTTACCTCGTTCAAATACTTCATCTGGTGC
AAGCCCTCCAGCTGATGCAAGCGATTCAGATGCTAAATCTTACGCTGATTTAAAACACAGAGTACGAAAT
TACTTGTTCACTATTAAAGAACTCAAATATCCCGAACTCTTTGATTTAACCAATCATATGTTAACTTTGT
GTGATAATATTCATGGTTTCAAATATTTAATTGATGGATATGAAGAAATTAATGAATTATTATATAAATT
AAACTTTTATTTTGATTTATTAAGAGCAAAATTAAATGATGTATGTGCTAATGATTATTGTCAAATACCT
TTCAATCTTAAAATTCGTGCAAATGAATTAGACGTACTTAAAAAACTTGTGTTCGGATATAGAAAACCAT
TAGACAATATTAAAGATAATGTAGGAAAAATGGAAGATTACATTAAAAAAAATAAAACAACCATAGCAAA
TATAAATGAATTAATTGAAGGAAGTAAGAAAACAATTGATCAAAATAAGAATGCAGATAATGAAGAAGGA
AAAAAAAAATTATACCAAGCTCAATATGATCTTTCTATTTACAATAAACAATTAGAAGAAGCACATAATT
TAATAAGCGTTTTAGAAAAACGTATTGACACTTTAAAAAAAAATGAAAACATAAAGAAATTACTTGAAGA
TATAGATAAAATTAAAACAGATGCCGAAAAACTCACTACTGGAAGTAAACCAAATCCTCTCCCTGAGAAT
AAGAAAAAAGAAGTCGAGGGACACGAAGAAAAAATAAAAGAAATTGCCAAAACTATTAAATTTAACATTG
ATAGTTTATTTACTGATCCACTTGAATTAGAATATTATTTAAGAGAAAAAAATAAAAAAGTTGATGTAAC
ACCTAAATCACAAGATCCTACGAAATCTGTTCAAATACCAAAAGTTCCTTATCCAAATGGTATTGTATAT
CCTTTACCACTCACTGATATTCATAATTCATTAGCTGCAGATAATGATAAAAATTCATATGGTGATTTAA
TGAATCCTAATACTAAAGAAAAAATTAATGAAAAAATTATTACAGATAATAAGGAAAGAAAAATATTCAT
TAATAACATTAAAAAACAAATTGATTTAGAAGAAAAAAACATTAATCACACAAAAGAACAAAATAAAAAA
TTACTTGAAGATTATGAAAAGTCAAAAAAGGATTATGAAGAATTACTTGAAAAATTTTATGAAATGAAAT
TTAATAATAATTTTAACAAAGATGTCGTAGATAAAATATTCAGTGCAAGATATACATATAATGTTGAAAA
ACAAAGATATAATAATAAATTTTCATCCTCTAATAATTCTGTATATAATGTTCAAAAATTAAAAAAGGCT
CTTTCATATCTTGAAGATTATTCTTTAAGAAAAGGAATTTCTGAAAAAGATTTTAATCATTATTATACTT
TGAAAACTGGCCTCGAAGCTGATATAAAAAAATTAACAGAAGAAATAAAGAGTAGTGAAAACAAAATTCT
AGAAAAAAATTTTAAAGGACTAACACATTCAGCAAATGCTTCCTTAGAAGTATCTGATATTGTAAAATTA
CAAGTACAAAAAGTTTTATTAATTAAAAAAATAGAAGACTTAAGAAAGATAGAATTATTTTTAAAAAATG
CACAACTAAAAGATAGTATTCATGTACCAAATATTTATAAACCACAAAATAAACCAGAACCATATTATTT
AATTGTATTAAAAAAAGAAGTAGATAAATTAAAAGAATTTATACCAAAAGTAAAAGACATGTTAAAGAAA
GAACAAGCTGTCTTATCAAGTATTACACAACCTTTAGTTGCAGCAAGCGAAACAACTGAAGATGGGGGTC
ACTCCACACACACATTATCCCAATCAGGAGAAACAGAAGTAACAGAAGAAACAGAAGAAACAGAAGAAAC
AGTAGGACACACAACAACGGTAACAATAACATTACCACCAACACAACCATCACCACCAAAAGAAGTAAAA
GTTGTTGAAAATTCAATAGAACATAAGAGTAATGACAATTCACAAGCCTTGACAAAAACAGTTTATCTAA
AGAAATTAGATGAATTTTTAACTAAATCATATATATGTCATAAATATATTTTAGTATCAAACTCTAGTAT
GGACCAAAAATTATTAGAGGTATATAATCTTACTCCAGAAGAAGAAAATGAATTAAAATCATGTGATCCA
TTAGATTTATTATTTAATATTCAAAATAACATACCTGCTATGTATTCATTATATGATAGTATGAACAATG
ATTTACAACATCTCTTTTTTGAATTATATCAAAAGGAAATGATTTATTATTTACATAAACTAAAAGAGGA
AAATCACATCAAAAAATTATTAGAGGAGCAAAAACAAATAACTGGAACATCATCTACATCCAGTCCTGGA
AATACAACCGTAAATACTGCTCAATCCGCAACTCACAGTAATTCCCAAAACCAACAATCAAATGCATCCT
CTACCAATACCCAAAATGGTGTAGCTGTATCATCTGGTCCTGCTGTAGTTGAAGAAAGTCATGATCCCTT
AACAGTATTGTCTATTAGTAACGATTTGAAAGGTATTGTTAGTCTCTTAAATCTTGGAAATAAAACTAAA
GTACCTAATCCATTAACCATTTCTACAACAGAGATGGAAAAATTTTATGAGAATATTTTAAAAAATAATG
ATACCTATTTTAATGATGATATCAAACAATTCGTAAAATCTAATTCAAAAGTAATTACAGGTTTGACCGA
AACACAAAAAAATGCATTAAATGATGAAATTAAAAAATTAAAAGATACTTTACAGTTATCATTTGATTTA
TATAATAAATATAAATTAAAATTAGATAGATTATTTAATAAGAAAAAAGAACTTGGCCAAGACAAAATGC
AAATTAAAAAACTTACTTTATTAAAAGAACAATTAGAATCAAAATTGAATTCACTTAATAACCCACATAA
TGTATTACAAAACTTTTCTGTTTTCTTTAACAAAAAAAAAGAAGCTGAAATAGCAGAAACTGAAAACACA
TTAGAAAACACAAAAATATTATTGAAACATTATAAAGGACTTGTTAAATATTATAATGGTGAATCATCTC
CATTAAAAACTTTAAGTGAAGTATCAATTCAAACAGAAGATAATTATGCCAATTTAGAAAAATTTAGAGT
ATTAAGTAAAATAGATGGAAAACTCAATGATAATTTACATTTAGGAAAGAAAAAATTATCTTTCTTATCA
AGTGGATTACATCATTTAATTACTGAATTAAAAGAAGTAATAAAAAATAAAAATTATACAGGTAATTCTC
CAAGTGAAAATAATAAGAAAGTTAACGAAGCTTTAAAATCTTACGAAAATTTTCTCCCAGAAGCAAAAGT
TACAACAGTTGTAACTCCACCTCAACCAGATGTAACTCCATCTCCATTATCTGTAAGGGTAAGTGGTAGT
TCAGGATCCACAAAAGAAGAAACACAAATACCAACTTCAGGCTCTTTATTAACAGAATTACAACAAGTAG
TACAATTACAAAATTATGACGAAGAAGATGATTCCTTAGTTGTATTACCCATTTTTGGAGAATCCGAAGA
TAATGACGAATATTTAGATCAAGTAGTAACTGGAGAAGCAATATCTGTCACAATGGATAATATCCTCTCA
GGATTTGAAAATGAATATGATGTTATATATTTAAAACCTTTAGCTGGAGTATATAGAAGCTTAAAAAAAC
AAATTGAAAAAAACATTTTTACATTTAATTTAAATTTGAACGATATCTTAAATTCACGTCTTAAGAAACG
AAAATATTTCTTAGATGTATTAGAATCTGATTTAATGCAATTTAAACATATATCCTCAAATGAATACATT
ATTGAAGATTCATTTAAATTATTGAATTCAGAACAAAAAAACACACTTTTAAAAAGTTACAAATATATAA
AAGAATCAGTAGAAAATGATATTAAATTTGCACAGGAAGGTATAAGTTATTATGAAAAGGTTTTAGCGAA
ATATAAGGATGATTTAGAATCAATTAAAAAAGTTATCAAAGAAGAAAAGGAGAAGTTCCCATCATCACCA
CCAACAACACCTCCGTCACCAGCAAAAACAGACGAACAAAAGAAGGAAAGTAAGTACCTTCCATTTTTAA
CAAACATTGAGACCTTATACAATAACTTAGTTAATAAAATTGACGATTACTTAATTAACTTAAAGGCAAA
GATTAACGATTGTAATGTTGAAAAAGATGAAGCACATGTTAAAATAACTAAACTTAGTGATTTAAAAGCA
ATTGATGACAAAATAGATCTTTTTAAAAACCATAACGACTTCGAAGCAATTAAAAAATTGATAAATGATG
ATACGAAAAAAGATATGCTTGGCAAATTACTTAGTACAGGATTAGTTCAAAATTTTCCTAATACAATAAT
ATCAAAATTAATTGAAGGAAAATTCCAAGATATGTTAAACATTTCACAACACCAATGCGTAAAAAAACAA
TGTCCACAAAATTCTGGATGTTTCAGACATTTAGATGAAAGAGAAGAATGTAAATGTTTATTAAATTACA
AACAAGAAGGTGATAAATGTGTTGAAAATCCAAATCCTACTTGTAACGAAAATAATGGTGGATGTGATGC
AGATGCCACATGTACCGAAGAAGATTCAGGTAGCAGCAGAAAGAAAATCACATGTGAATGTACTAAACCT
GATTCTTATCCACTTTTCGATGGTATTTTCTGCAGTTCCTCTAACTTCTTAGGAATATCATTCTTATTAA
TACTCATGTTAATATTATACAGTTTCATTTAA

>AB502459.1 Plasmodium falciparum msp1 gene for merozoite surface protein-1, complete cds, isolate: Tz98-024
ATGAAGATCATATTCTTTTTATGTTCATTTCTTTTTTTTATTATAAATACACAATGTGTAACACATGAAA
GTTATCAAGAACTTGTCAAAAAACTAGAAGCTTTAGAAGATGCAGTATTGACAGGTTATGGTTTATTTCA
TAAGGAAAAAATGATCTTAAATGAAGAAGAAATTACTACAAAAGGTGCAAGTGCTCAAAGTGGTACAAGT
GGTACAAGTGGTACAAGTGGTACAAGTGGTACAAGTGGTACAAGTGGTACAAGTGGTACAAGTGGTCCAA
GTGGTCCAAGTGGTACAAGTCCATCATCTCGTTCAAACACTTTACCTCGTTCAAATACTTCATCTGGTGC
AAGCCCTCCAGCTGATGCAAGCGATTCAGATGCTAAATCTTACGCTGATTTAAAACACAGAGTACGAAAT
TACTTGTTCACTATTAAAGAACTCAAATATCCCGAACTCTTTGATTTAACCAATCATATGTTAACTTTGT
GTGATAATATTCATGGTTTCAAATATTTAATTGATGGATATGAAGAAATTAATGAATTATTATATAAATT
AAACTTTTATTTTGATTTATTAAGAGCAAAATTAAATGATGTATGTGCTAATGATTATTGTCAAATACCT
TTCAATCTTAAAATTCGTGCAAATGAATTAGACGTACTTAAAAAACTTGTGTTCGGATATAGAAAACCAT
TAGACAATATTAAAGATAATGTAGGAAAAATGGAAGATTACATTAAAAAAAATAAAACAACCATAGCAAA
TATAAATGAATTAATTGAAGGAAGTAAGAAAACAATTGATCAAAATAAGAATGCAGATAATGAAGAAGGA
AAAAAAAAATTATACCAAGCTCAATATGATCTTTCTATTTACAATAAACAATTAGAAGAAGCACATAATT
TAATAAGCGTTTTAGAAAAACGTATTGACACTTTAAAAAAAAATGAAAACATAAAGAAATTACTTGAAGA
TATAGATAAAATTAAAACAGATGCCGAAAAACCCACTACTGGAAGTAAACCAAATACTCTCCTTGATAAG
AACAAAAAAATCGAGGAACACGAAGAAAAAATAAAAGAAATTGCCAAAACTATTAAATTTAACATTGATA
GTTTATTTACTGATCCACTTGAATTAGAATATTATTTAAGAGAAAAAAATAAAAAAGTTGATGTAACACC
TAAATCACAAGATCCTACGAAATCTGTTCAAATACCAAAAGTTCCTTATCCAAATGGTATTGTATATCCT
TTACCACTCACTGATATTCATAATTCATTAGCTGCAGATAATGATAAAAATTCATATGGTGATTTAATGA
ATCCTGATACTAAAGAAAAAATTAATGAAAAAATTATTACAGATAATAAGGAAAGAAAAATATTCATTAA
TAACATTAAAAAACAAATTGATTTAGAAGAAAAAAACATTAATCACACAAAAGAACAAAATAAAAAATTA
CTTGAAGATTATGAAAAGTCAAAAAAGGATTATGAAGAATTACTTGAAAAATTTTATGAAATGAAATTTA
ATAATAATTTTAACAAAGATGTCGTAGATAAAATGTTCAGTGCAAGATATACATATAATGTTGAAAAACA
AAGATATAATAATAAATTTTCATCCTCTAATAATTCTGTATATAATGTTCAAAAATTAAAAAAGGCTCTT
TCATATCTTGAAGATTATTCTTTAAGAAAAGGAATTTCTGAAAAAGATTTTAATCATTATTATACTTTGA
AAACTGGCCTCGAAGCTGATATAAAAAAATTAACAGAAGAAATAAAGAGTAGTGAAAACAAAATTCTAGA
AAAAAATTTTAAAGGACTAACACATTCAGCAAATGCTTCCTTAGAAGTATATGATATTGTAAAATTACAA
GTACAAAAAGTTTTATTAATTAAAAAAATAGAAGACTTAAGAAAGATAGAATTATTTTTAAAAAATGCAC
AACTAAAAGATAGTATTCATGTACCAAATATTTATAAACCACAAAATAAACCAGAACCATATTATTTAAT
TGTATTAAAAAAAGAAGTAGATAAATTAAAAGAATTTATACCAAAAGTAAAAGACATGTTAAAGAAAGAA
CAAGCTGTCTTATCAAGTATTACACAACCTTTAGTTGCAGCAAGCGAAACAACTGAAGATGGGGGTCACT
CCACACACACATTATCCCAATCAGGAGAAACAGAAGTAACAGAAGAAACAGAAGAAACAGTAGGACACAC
AACAACGGTAACAATAACATTACCACCAAAAGAAGTAAAAGTTGTTGAAAATTCAATAGAACATAAGAGT
AATGACAATTCACAAGCCTTGACAAAAACAGTTTATCTAAAGAAATTAGATGAATTTTTAACTAAATCAT
ATATATGTCATAAATATATTTTAGTATCAAACTCTAGTATGGACCAAAAATTATTAGAGGTATATAATCT
TACTCCAGAAGAAGAAAATGAATTAAAATCATGTGATCCATTAGATTTATTATTTAATATTCAAAATAAC
ATACCTGCTATGTATTCATTATATGATAGTATGAACAATGATTTACAACATCTCTTTTTTGAATTATATC
AAAAGGAAATGATTTATTATTTACATAAACTAAAAGAGGAAAATCACATCAAAAAATTATTAGAGGAGCA
AAAACAAATAACTGGAACATCATCTACATCCAGTCCTGGAAATACAACCGTAAATACTGCTCAATCCGCA
ACTCACAGTAATTCCCAAAACCAACAATCAAATGCATCCTCTACCAATACCCAAAATGGTGTAGCTGTAT
CATCTGGTCCTGCTGTAGTTGAAGAAAGTCATGATCCCTTAACAGTATTGTCTATTAGTAACGATTTGAA
AGGTATTGTTAGTCTCTTAAATCTTGGAAATAAAACTAAAGTACCTAATCCATTAACCATTTCTACAACA
GAGATGGAAAAATTTTATGAGAATATTTTAAAAAATAATGATACCTATTTTAATGATGATATCAAACAAT
TCGTAAAATCTAATTCAAAAGTAATTACAGGTTTGACCGAAACACAAAAAAATGCATTAAATGATGAAAT
TAAAAAATTAAAAGATACTTTACAGTTATCATTTGATTTATATAATAAATATAAATTAAAATTAGATAGA
TTATTTAATAAGAAAAAAGAACTTGGCCAAGACAAAATGCAAATTAAAAAACTTACTTTATTAAAAGAAC
AATTAGAATCAAAATTGAATTCACTTAATAACCCACATAATGTATTACAAAACTTTTCTGTTTTCTTTAA
CAAAAAAAAAGAAGCTGAAATAGCAGAAACTGAAAACACATTAGAAAACACAAAAATATTATTGAAACAT
TATAAAGGACTTGTTAAATATTATAATGGTGAATCATCTCCATTAAAAACTTTAAGTGAAGTATCAATTC
AAACAGAAGATAATTATGCCAATTTAGAAAAATTTAGAGTATTAAGTAAAATAGATGGAAAACTCAATGA
TAATTTACATTTAGGAAAGAAAAAATTATCTTTCTTATCAAGTGGATTACATCATTTAATTACTGAATTA
AAAGAAGTAATAAAAAATAAAAATTATACAGGTAATTCTCCAAGTGAAAATAATAAGAAAGTTAACGAAG
CTTTAAAATCTTACGAAAATTTTCTCCCAGAAGCAAAAGTTACAACAGTTGTAACTCCACCTCAACCAGA
TGTAACTCCATCTCCATTATCTGTAAGGGTAAGTGGTAGTTCAGGATCCACAAAAGAAGAAACACAAATA
CCAACTTCAGGCTCTTTATTAACAGAATTACAACAAGTAGTACAATTACAAAATTATGACGAAGAAGATG
ATTCCTTAGTTGTATTACCCATTTTTGGAGAATCCGAAGATAATGACGAATATTTAGATCAAGTAGTAAC
TGGAGAAGCAATATCTGTCACAATGGATAATATCCTCTCAGGATTTGAAAATGAATATGATGTTATATAT
TTAAAACCTTTAGCTGGAGTATATAGAAGCTTAAAAAAACAAATTGAAAAAAACATTTTTACATTTAATT
TAAATTTGAACGATATCTTAAATTCACGTCTTAAGAAACGAAAATATTTCTTAGATGTATTAGAATCTGA
TTTAATGCAATTTAAACATATATCCTCAAATGAATACATTATTGAAGATTCATTTAAATTATTGAATTCA
GAACAAAAAAACACACTTTTAAAAAGTTACAAATATATAAAAGAATCAGTAGAAAATGATATTAAATTTG
CACAGGAAGGTATAAGTTATTATGAAAAGGTTTTAGCGAAATATAAGGATGATTTAGAATCAATTAAAAA
AGTTATCAAAGAAGAAAAGGAGAAGTTCCCATCATCACCACCAACAACACCTCCGTCACCAGCAAAAACA
GACGAACAAAAGAAGGAAAGTAAGTTCCTTCCATTTTTAACAAACATTGAGACCTTATACAATAACTTAG
TTAATAAAATTGACGATTACTTAATTAACTTAAAGGCAAAGATTAACGATTGTAATGTTGAAAAAGATGA
AGCACATGTTAAAATAACTAAACTTAGTGATTTAAAAGCAATTGATGACAAAATAGATCTTTTTAAAAAC
CATAACGACTTCGAAGCAATTAAAAAATTGATAAATGATGATACGAAAAAAGATATGCTTGGCAAATTAC
TTAGTACAGGATTAGTTCAAAATTTTCCTAATACAATAATATCAAAATTAATTGAAGGAAAATTCCAAGA
TATGTTAAACATTTCACAACACCAATGCGTAAAAAAACAATGTCCAGAAAATTCTGGATGTTTCAGACAT
TTAGATGAAAGAGAAGAATGTAAATGTTTATTAAATTACAAACAAGAAGGTGATAAATGTGTTGAAAATC
CAAATCCTACTTGTAACGAAAATAATGGTGGATGTGATGCAGATGCCAAATGTACCGAAGAAGATTCAGG
TAGCAACGGAAAGAAAATCACATGTGAATGTACTAAACCTGATTCTTATCCACTTTTCGATGGTATTTTC
TGCAGTTCCTCTAACTTCTTAGGAATATCATTCTTATTAATACTCATGTTAATATTATACAGTTTCATTT
AA

>AB502460.1 Plasmodium falciparum msp1 gene for merozoite surface protein-1, complete cds, isolate: Tz98-030
ATGAAGATCATATTCTTTTTATGTTCATTTCTTTTTTTTATTATAAATACACAATGTGTAACACATGAAA
GTTATCAAGAACTTGTCAAAAAACTAGAAGCTTTAGAAGATGCAGTATTGACAGGTTATAGTTTATTTCA
AAAGGAAAAAATGGTATTAAATGAAGAAGAAATTACTACAAAAGGTGCAAGTGCTCAAAGTGGTGCAAGT
GCTCAAAGTGGTGCAAGTGCTCAAAGTGGTGCAAGTGCTCAAAGTGGTGCAAGTGCTCAAAGTGGTACAA
GTGGTCCAAGTGGTCCAAGTGGTACAAGTCCATCATCTCGTTCAAACACTTTACCTCGTTCAAATACTTC
ATCTGGTGCAAGCCCTCCAGCTGATGCAAGCGATTCAGATGCTAAATCTTACGCTGATTTAAAACACAGA
GTACGAAATTACTTGTTCACTATTAAAGAACTCAAATATCCCGAACTCTTTGATTTAACCAATCATATGT
TAACTTTGTGTGATAATATTCATGGTTTCAAATATTTAATTGATGGATATGAAGAAATTAATGAATTATT
ATATAAATTAAACTTTTATTTTGATTTATTAAGAGCAAAATTAAATGATGTATGTGCTAATGATTATTGT
CAAATACCTTTCAATCTTAAAATTCGTGCAAATGAATTAGACGTACTTAAAAAACTTGTGTTCGGATATA
GAAAACCATTAGACAATATTAAAGATAATGTAGGAAAAATGGAAGATTACATTAAAAAAAATAAAACAAC
CATAGCAAATATAAATGAATTAATTGAAGGAAGTAAGAAAACAATTGATCAAAATAAGAATGCAGATAAT
GAAGAAGGAAAAAAAAAATTATACCAAGCTCAATATGATCTTTCTATTTACAATAAACAATTAGAAGAAG
CACATAATTTAATAAGCGTTTTAGAAAAACGTATTGACACTTTAAAAAAAAATGAAAACATAAAGAAATT
ACTTGAAGATATAGATAAAATTAAAACAGATGCCGAAAAACCCACTACTGGAAGTAAACCAAATACTCTC
CTTGATAAGAACAAAAAAATCGAGGAACACGAAGAAAAAATAAAAGAAATTGCCAAAACTATTAAATTTA
ACATTGATAGTTTATTTACTGATCCACTTGAATTAGAATATTATTTAAGAGAAAAAAATAAAAAAGTTGA
TGTAACACCTAAATCACAAGATCCTACGAAATCTGTTCAAATACCAAAAGTTCCTTATCCAAATGGTATT
GTATATCCTTTACCACTCACTGATATTCATAATTCATTAGCTGCAGATAATGATAAAAATTCATATGGTG
ATTTAATGAATCCTGATACTAAAGAAAAAATTAATGAAAAAATTATTACAGATAATAAGGAAAGAAAAAT
ATTCATTAATAACATTAAAAAACAAATTGATTTAGAAGAAAAAAACATTAATCACACAAAAGAACAAAAT
AAAAAATTACTTGAAGATTATGAAGAGTCAAAAAAGGATTATGAAAAATTACTTGAAAAATTTTATGAAA
TGAAATTTAATAATAATTTTGACAAAGATGTCGTAGATAAAATGTTCAGTGCAAGATATACATATAATGT
TGAAAAACAAAGATATAATAATAAATTTTCATCCTCTAATAATTCTGTATATAATGTTCAAAAATTAAAA
AAGGCTCTTTCATATCTTGAAGATTATTCTTTAAGAAAAGGAATTTCTGAAAAAGATTTTAATCATTATT
ATACTTTGAAAACTGGCCTCGAAGCTGATATAAAAAAATTAACAGAAGAAATAAAGAGTAGTGAAAACAA
AATTCTAGAAAAAAATTTTAAAGGACTAACACATTCAGCAAATGCTTCCTTAGAAGTATATGATATTGTA
AAATTACAAGTACAAAAAGTTTTATTAATTAAAAAAATAGAAGACTTAAGAAAGATAGAATTATTTTTAA
AAAATGCACAACTAAAAGATAGTATTCATGTACCAAATATTTATAAACCACAAAATAAACCAGAACCATA
TTATTTAATTGTATTAAAAAAAGAAGTAGATAAATTAAAAGAATTTATACCAAAAGTAAAAGACATGTTA
AAGAAAGAACAAGCTGTCTTATCAAGTATTACACAACCTTTAGTTGCAGCAAGCGAAACAACTGAAGATG
GGGGTCACTCCACACACACATTATCCCAATCAGGAGAAACAGAAGTAACAGAAGAAACAGAAGAAACAGA
AGAAACAGTAGGACACACAACAACGGTAACAATAACATTACCACCAACACAACCATCACCACCAAAAGAA
GTAAAAGTTGTTGAAAATTCAATAGAACATAAGAGTAATGACAATTCACAAGCCTTGACAAAAACAGTTT
ATCTAAAGAAATTAGATGAATTTTTAACTAAATCATATATATGTCATAAATATATTTTAGTATCAAACTC
TAGTATGGACCAAAAATTATTAGAGGTATATAATCTTACTCCAGAAGAAGAAAATGAATTAAAATCATGT
GATCCATTAGATTTATTATTTAATATTCAAAATAACATACCTGCTATGTATTCATTATATGATAGTATGA
ACAATGATTTACAACATCTCTTTTTTGAATTATATCAAAAGGAAATGATTTATTATTTACATAAACTAAA
AGAGGAAAATCACATCAAAAAATTATTAGAGGAGCAAAAACAAATAACTGGAACATCATCTACATCCAGT
CCTGGAAATACAACCGTAAATACTGCTCAATCCGCAACTCACAGTAATTCCCAAAACCAACAATCAAATG
CATCCTCTACCAATACCCAAAATGGTGTAGCTGTATCATCTGGTCCTGCTGTAGTTGAAGAAAGTCATGA
TCCCTTAGCAGTATTGTCTATTAGTAACGATTTGAAAGGTATTGTTAGTCTCTTAAATCTTGGAAATAAA
ACTAAAGTACCTAATCCATTAACCATTTCTACAACAGAGATGGAAAAATTTTATGAGAATATTTTAAAAA
ATAATGATACCTATTTTAATGATGATATCAAACAATTCGTAAAATCTAATTCAAAAGTAATTACAGGTTT
GACCGAAACACAAAAAAATGCATTAAATGATGAAATTAAAAAATTAAAAGATACTTTACAGTTATCATTT
GATTTATATAATAAATATAAATTAAAATTAGATAGATTATTTAATAAGAAAAAAGAACTTGGCCAAGACA
AAATGCAAATTAAAAAACTTACTTTATTAAAAGAACAATTAGAATCAAAATTGAATTCACTTAATAACCC
ACATAATGTATTACAAAACTTTTCTGTTTTCTTTAACAAAAAAAAAGAAGCTGAAATAGCAGAAACTGAA
AACACATTAGAAAACACAAAAATATTATTGAAACATTATAAAGGACTTGTTAAATATTATAATGGTGAAT
CATCTCCATTAAAAACTTTAAGTGAAGTATCAATTCAAACAGAAGATAATTATGCCAATTTAGAAAAATT
TAGAGTATTAAGTAAAATAGATGGAAAACTCAATGATAATTTACATTTAGGAAAGAAAAAATTATCTTTC
TTATCAAGTGGATTACATCATTTAATTACTGAATTAAAAGAAGTAATAAAAAATAAAAATTATACAGGTA
ATTCTCCAAGTGAAAATAATAAGAAAGTTAACGAAGCTTTAAAATCTTACGAAAATTTTCTCCCAGAAGC
AAAAGTTACAACAGTTGTAACTCCACCTCAACCAGATGTAACTCCATCTCCATTATCTGTAAGGGTAAGT
GGTAGTTCAGGATCCACAAAAGAAGAAACACAAATACCAACTTCAGGCTCTTTATTAACAGAATTACAAC
AAGTAGTACAATTACAAAATTATGACGAAGAAGATGATTCCTTAGTTGTATTACCCATTTTTGGAGAATC
CGAAGATAATGACGAATATTTAGATCAAGTAGTAACTGGAGAAGCAATATCTGTCACAATGGATAATATC
CTCTCAGGATTTGAAAATGAATATGATGTTATATATTTAAAACCTTTAGCTGGAGTATATAGAAGCTTAA
AAAAACAAATTGAAAAAAACATTTTTACATTTAATTTAAATTTGAACGATATCTTAAATTCACGTCTTAA
GAAACGAAAATATTTCTTAGATGTATTAGAATCTGATTTAATGCAATTTAAACATATATCCTCAAATGAA
TACATTATTGAAGATTCATTTAAATTATTGAATTCAGAACAAAAAAACACACTTTTAAAAAGTTACAAAT
ATATAAAAGAATCAGTAGAAAATGATATTAAATTTGCACAGGAAGGTATAAGTTATTATGAAAAGGTTTT
AGCGAAATATAAGGATGATTTAGAATCAATTAAAAAAGTTATCAAAGAAGAAAAGGAGAAGTTCCCATCA
TCACCACCAACAACACCTCCGTCACCAGCAAAAACAGACGAACAAAAGAAGGAAAGTAAGTTCCTTCCAT
TTTTAACAAACATTGAGACCTTATACAATAACTTAGTTAATAAAATTGACGATTACTTAATTAACTTAAA
GGCAAAGATTAACGATTGTAATGTTGAAAAAAATGAAGCACATGTTAAAATAACTAAACTTAGTGATTTA
AAAGCAATTGATGACAAAATAGATCTTTTTAAAAACCATAACGACTTCGAAGCAATTAAAAAATTGATAA
ATGATGATACGAAAAAAGATATGCTTGGCAAATTACTTAGTACAGGATTAGTTCAAAATTTTCCTAATAC
AATAATATCAAAATTAATTGAAGGAAAATTCCAAGATATGTTAAACATTTCACAACACCAATGCGTAAAA
AAACAATGTCCAGAAAATTCTGGATGTTTCAGACATTTAGATGAAAGAGAAGAATGTAAATGTTTATTAA
ATTACAAACAAGAAGGTGATAAATGTGTTGAAAATCCAAATCCTACTTGTAACGAAAATAATGGTGGATG
TGATGCAGATGCCAAATGTACCGAAGAAGATTCAGGTAGCAACGGAAAGAAAATCACATGTGAATGTACT
AAACCTGATTCTTATCCACTTTTCGATGGTATTTTCTGCAGTTCCTCTAACTTCTTAGGAATATCATTCT
TATTAATACTCATGTTAATATTATACAGTTTCATTTAA

>AB502461.1 Plasmodium falciparum msp1 gene for merozoite surface protein-1, complete cds, isolate: Tz98-032
ATGAAGATCATATTCTTTTTATGTTCATTTCTTTTTTTTATTATAAATACACAATGTGTAACACATGAAA
GTTATCAAGAACTTGTCAAAAAACTAGAAGCTTTAGAAGATGCAGTATTGACAGGTTATAGTTTATTTCA
AAAGGAAAAAATGGTATTAAATGAAGAAGAAATTACTACAAAAGGTGCAAGTGCTCAAAGTGGTGCAAGT
GCTCAAAGTGGTGCAAGTGCTCAAAGTGGTACAAGTGGTACAAGTGGTACAAGTGGTACAAGTGGTCCAA
GTGGTCCAAGTGGTACAAGTCCATCATCTCGTTCAAACACTTTACCTCGTTCAAATACTTCATCTGGTGC
AAGCCCTCCAGCTGATGCAAGCGATTCAGATGCTAAATCTTACGCTGATTTAAAACACAGAGTACGAAAT
TACTTGTTCACTATTAAAGAACTCAAATATCCCGAACTCTTTGATTTAACCAATCATATGTTAACTTTGT
GTGATAATATTCATGGTTTCAAATATTTAATTGATGGATATGAAGAAATTAATGAATTATTATATAAATT
AAACTTTTATTTTGATTTATTAAGAGCAAAATTAAATGATGTATGTGCTAATGATTATTGTCAAATACCT
TTCAATCTTAAAATTCGTGCAAATGAATTAGACGTACTTAAAAAACTTGTGTTCGGATATAGAAAACCAT
TAGACAATATTAAAGATAATGTAGGAAAAATGGAAGATTACATTAAAAAAAATAAAACAACCATAGCAAA
TATAAATGAATTAATTGAAGGAAGTAAGAAAACAATTGATCAAAATAAGAATGCAGATAATGAAGAAGGA
AAAAAAAAATTATACCAAGCTCAATATGATCTTTCTATTTACAATAAACAATTAGAAGAAGCACATAATT
TAATAAGCGTTTTAGAAAAACGTATTGACACTTTAAAAAAAAATGAAAACATAAAGAAATTACTTGAAGA
TATAGATAAAATTAAAACAGATGCCGAAAAACTCACTACTGGAAGTAAACCAAATACTCTCCTTGATAAG
AACAAAAAAATCGAGGAACACGAAGAAAAAATAAAAGAAATTGCCAAAACTATTAAATTTAACATTGATA
GTTTATTTACTGATCCACTTGAATTAGAATATTATTTAAGAGAAAAAAATAAAAAAGTTGATGTAACACC
TAAATCACAAGATCCTACGAAATCTGTTCAAATACCAAAAGTTCCTTATCCAAATGGTATTGTATATCCT
TTACCACTCACTGATATTCATAATTCATTAGCTGCAGATAATGATAAAAATTCATATGGTGATTTAATGA
ATCCTCATACTAAAGAAAAAATTAATGAAAAAATTATTACAGATAATAAGGAAAGAAAAATATTCATTAA
TAACATTAAAAAACAAATTGATTTAGAAGAAAATAACATTAATCACACAAAAGAACAAAATAAAAAATTA
CTTGAAGATTATGAAAAGTCAAAAAAGGATTATGAAGAATTACTTGAAAAATTTTATGAAATGAAATTTA
ATAATAATTTTAACAAAGATGTCGTAGATAAAATATTCAGTGCAAGATATACATATAATGTTGAAAAACA
AAGATATAATAATAAATTTTCATCCTCTAATAATTCTGTATATAATGTTCAAAAATTAAAAAAGGCTCTT
TCATATCTTGAAGATTATTCTTTAAGAAAAGGAATTTCTGAAAAAGATTTTAATCATTATTATACTTTGA
AAACTGGCCTCGAAGCTGATATAAAAAAATTAACAGAAGAAATAAAGAGTAGTGAAAACAAAATTCTAGA
AAAAAATTTTAAAGGACTAACACATTCAGCAAATGCTTCCTTAGAAGTATATGATATTGTAAAATTACAA
GTACAAAAAGTTTTATTAATTAAAAAAATAGAAGACTTAAGAAAGATAGAATTATTTTTAAAAAATGCAC
AACTAAAAGATAGTATTCATGTACCAAATATTTATAAACCACAAAATAAACCAGAACCATATTATTTAAT
TGTATTAAAAAAAGAAGTAGATAAATTAAAAGAATTTATACCAAAAGTAAAAGACATGTTAAAGAAAGAA
CAAGCTGTCTTATCAAGTATTACACAACCTTTAGTTGCAGCAAGCGAAACAACTGAAGATGGGGGTCACT
CCACACACACATTATCCCAATCAGGAGAAACAGAAGAAACAGAAGAAACAGAAGAAACAGTAGGACACAC
AACAACGGTAACAATAACATTACCACCAAAAGAAGTAAAAGTTGTTGAAAATTCAATAGAACATAAGAGT
AATGACAATTCACAAGCCTTGACAAAAACAGTTTATCTAAAGAAATTAGATGAATTTTTAACTAAATCAT
ATATATGTCATAAATATATTTTAGTATCAAACTCTAGTATGGACCAAAAATTATTAGAGGTATATAATCT
TACTCCAGAAGAAAAAAATGAATTAAAATCATGTGATCCATTAGATTTATTATTTAATATTCAAAATAAC
ATACCTGCTATGTATTCATTATATGATAGTATGAACAATGATTTACAACATCTCTTTTTTGAATTATATC
AAAAGGAAATGATTTATTATTTACATAAACTAAAAGAGGAAAATCACATCAAAAAATTATTAGAGGAGCA
AAAACAAATAACTGGAACATCATCTACATCCAGTCCTGGAAATACAACCGTAAATACTGCTCAATCCGCA
ACTCACAGTAATTCCCAAAACCAACAATCAAATGCATCCTCTACCAATACCCAAAATGGTGTAGCTGTAT
CATCTGGTCCTGCTGTAGTTGAAGAAAGTCATGATCCCTTAACAGTATTGTCTATTAGTAACGATTTGAA
AGGTATTGTTAGTCTCTTAAATCTTGGAAATAAAACTAAAGTACCTAATCCATTAACCATTTCTACAACA
GAGATGGAAAAATTTTATGAGAATATTTTAAAAAATAATGATACCTATTTTAATGATGATATCAAACAAT
TCGTAAAATCTAATTCAAAAGTAATTACAGGTTTGACCGAAACACAAAAAAATGCATTAAATGATGAAAT
TAAAAAATTAAAAGATACTTTACAGTTATCATTTGATTTATATAATAAATATAAATTAAAATTAGATAGA
TTATTTAATAAGAAAAAAGAACTTGGCCAAGACAAAATGCAAATTAAAAAACTTACTTTATTAAAAGAAC
AATTAGAATCAAAATTGAATTCACTTAATAACCCACATAATGTATTACAAAACTTTTCTGTTTTCTTTAA
CAAAAAAAAAGAAGCTGAAATAGCAGAAACTGAAAACACATTAGAAAACACAAAAATATTATTGAAACAT
TATAAAGGACTTGTTAAATATTATAATGGTGAATCATCTCCATTAAAAACTTTAAGTGAAGTATCAATTC
AAACAGAAGATAATTATGCCAATTTAGAAAAATTTAGAGTATTAAGTAAAATAGATGGAAAACTCAATGA
TAATTTACATTTAGGAAAGAAAAAATTATCTTTCTTATCAAGTGGATTACATCATTTAATTACTGAATTA
AAAGAAGTAATAAAAAATAAAAATTATACAGGTAATTCTCCAAGTGAAAATAATAAGAAAGTTAACGAAG
CTTTAAAATCTTACGAAAATTTTCTCCCAGAAGCAAAAGTTACAACAGTTGTAACTCCACCTCAACCAGA
TGTAACTCCATCTCCATTATCTGTAAGGGTAAGTGGTAGTTCAGGATCCACAAAAGAAGAAACACAAATA
CCAACTTCAGGCTCTTTATTAACAGAATTACAACAAGTAGTACAATCACAAAATTATGACGAAGAAGATG
ATTCCTTAGTTGTATTACCCATTTTTGGAGAATCCGAAGATAATGACGAATATTTAGATCAAGTAGTAAC
TGGAGAAGCAATATCTGTCACAATGGATAATATCCTCTCAGGATTTGAAAATGAATATGATGTTATATAT
TTAAAACCTTTAGCTGGAGTATATAGAAGCTTAAAAAAACAAATTGAAAAAAACATTTTTACATTTAATT
TAAATTTGAACGATATCTTAAATTCACGTCTTAAGAAACGAAAATATTTCTTAGATGTATTAGAATCTGA
TTTAATGCAATTTAAACATATATCCTCAAATGAATACATTATTGAAGATTCATTTAAATTATTGAATTCA
GAACAAAAAAACACACTTTTAAAAAGTTACAAATATATAAAAGAATCAGTAGAAAATGATATTAAATTTG
CACAGGAAGGTATAAGTTATTATGAAAAGGTTTTAGCGAAATATAAGGATGATTTAGAATCAATTAAAAA
AGTTATCAAAGAAGAAAAGGAGAAGTTCCCATCATCACCACCAACAACACCTCCGTCACCAGCAAAAACA
GACGAACAAAAGAAGGAAAGTAAGTTCCTTCCATTTTTAACAAACATTGAGACCTTATACAATAACTTAG
TTAATAAAATTGACGATTACTTAATTAACTTAAAGGCAAAGATTAACGATTGTAATGTTGAAAAAGATGA
AGCACATGTTAAAATAACTAAACTTAGTGATTTAAAAGCAATTGATGACAAAATAGATCTTTTTAAAAAC
CATAACGACTTCGAAGCAATTAAAAAATTGATAAATGATGATACGAAAAGAGATATGCTTGGCAAATTAC
TTAGTACAGGATTAGTTCAAAATTTTCCTAATACAATAATATCAAAATTAATTGAAGGAAAATTCCAAGA
TATGTTAAACATTTCACAACACCAATGCGTAAAAAAACAATGTCCACAAAATTCTGGATGTTTCAGACAT
TTAGATGAAAGAGAAGAATGTAAATGTTTATTAAATTACAAACAAGAAGGTGATAAATGTGTTGAAAATC
CAAATCCTACTTGTAACGAAAATAATGGTGGATGTGATGCAGATGCCAAATGTACCGAAGAAGATTCAGG
TAGCAACGGAAAGAAAATCACATGTGAATGTACTAAACCTGATTCTTATCCATTTTTCGATGGTATTTTC
TGCAGTTCCTCTAACTTCTTAGGAATATCATTCTTATTAATACTCATGTTAATATTATACAGTTTCATTT
AA

>AB502462.1 Plasmodium falciparum msp1 gene for merozoite surface protein-1, complete cds, isolate: Tz98-045
ATGAAGATCATATTCTTTTTATGTTCATTTCTTTTTTTTATTATAAATACACAATGTGTAACACATGAAA
GTTATCAAGAACTTGTCAAAAAACTAGAAGCTTTAGAAGATGCAGTATTGACAGGTTATGGTTTATTTCA
TAAGGAAAAAATGATCTTAAATGAAGAAGAAATTACTACAAAAGGTGCAAGTGCTCAAAGTGCTCAAAGT
GGTACAAGTGGTACAAGTGGTACAAGTGGTACAAGTGGTACAAGTGGTACAAGTGGTACAAGTGCTCAAA
GTGGTACAAGTGCTCAAAGTGGTACAAGTGGTCCAAGTGGTCCAAGTGGTACAAGTCCATCATCTCGTTC
AAACACTTTACCTCGTTCAAATACTTCATCTGGTGCAAGCCCTCCAGCTGATGCAAGCGATTCAGATGCT
AAATCTTACGCTGATTTAAAACACAGAGTACGAAATTACTTGTTCACTATTAAAGAACTCAAATATCCCG
AACTCTTTGATTTAACCAATCATATGTTAACTTTGTGTGATAATATTCATGGTTTCAAATATTTAATTGA
TGGATATGAAGAAATTAATGAATTATTATATAAATTAAACTTTTATTTTGATTTATTAAGAGCAAAATTA
AATGATGTATGTGCTAATGATTATTGTCAAATACCTTTCAATCTTAAAATTCGTGCAAATGAATTAGACG
TACTTAAAAAACTTGTGTTCGGATATAGAAAACCATTAGACAATATTAAAGATAATGTAGGAAAAATGGA
AGATTACATTAAAAAAAATAAAACAACCATAGCAAATATAAATGAATTAATTGAAGGAAGTAAGAAAACA
ATTGATCAAAATAAGAATGCAGATAATGAAGAAGGAAAAAAAAAATTATACCAAGCTCAATATGATCTTT
CTATTTACAATAAACAATTAGAAGAAGCACATAATTTAATAAGCGTTTTAGAAAAACGTATTGACACTTT
AAAAAAAAATGAAAACATAAAGAAATTACTTGAAGATATAGATAAAATTAAAACAGATGCCGAAAAACTC
ACTACTGGAAGTAAACCAAATCCTCTCCCTGAGAATAAGAAAAAAGAAGTCGAGGGACACGAAGAAAAAA
TAAAAGAAATTGCCAAAACTATTAAATTTAACATTGATAGTTTATTTACTGATCCACTTGAATTAGAATA
TTATTTAAGAGAAAAAAATAAAAAAGTTGATGTAACACCTAAATCACAAGATCCTACGAAATCTGTTCAA
ATACCAAAAGTTCCTTATCCAAATGGTATTGTATATCCTTTACCACTCACTGATATTCATAATTCATTAG
CTGCAGATAATGATAAAAATTCATATGGTGATTTAATGAATCCTGATACTAAAGAAAAAATTAATGAAAA
AATTATTACAGATAATAAGGAAAGAAAAATATTCATTAATAACATTAAAAAACAAATTGATTTAGAAGAA
AAAAACATTAATCACACAAAAGAACAAAATAAAAAATTACTTGAAGATTATGAAAAGTCAAAAAAGGATT
ATGAAGAATTACTTGAAAAATTTTATGAAATGAAATTTAATAATAATTTTGACAAAGATGTCGTAGATAA
AATGTTCAGTGCAAGATATACATATAATGTTGAAAAACAAAGATATAATAATAAATTTTCATCCTCTAAT
AATTCTGTATATAATGTTCAAAAATTAAAAAAGGCTCTTTCATATCTTGAAGATTATTCTTTAAGAAAAG
GAATTTCTGAAAAAGATTTTAATCATTATTATACTTTGAAAACTGGCCTCGAAGCTGATATAAAAAAATT
AACAGAAGAAATAAAGAGTAGTGAAAACAAAATTCGAGAAAAAAATTTTAAAGGACTAACACATTCAGCA
AATGCTTCCTTAGAAGTATCTGATATTGTAAAATTACAAGTACAAAAAGTTTTATTAATTAAAAAAATAG
AAGACTTAAGAAAGATAGAATTATTTTTAAAAAATGCACAACTAAAAGATAGTATTCATGTACCAAATAT
TTATAAACCACAAAATAAACCAGAACCATATTATTTAATTGTATTAAAAAAAGAAGTAGATAAATTAAAA
GAATTTATACCAAAAGTAAAAGACATGTTAAAGAAAGAACAAGCTGTCTTATCAAGTATTACACAACCTT
TAGTTGCAGCAAGCGAAACAACTGAAGATGGGGGTCACTCCACACACACATTATCCCAATCAGGAGAAAC
AGAAGTAACAGAAGAAACAGAAGAAACAGAAGAAACAGTAGGACACACAACAACGGTAACAATAACATTA
CCACCAACACAACCATCACCACCAAAAGAAGTAAAAGTTGTTGAAAATTCAATAGAACATAAGAGTAATG
ACAATTCACAAGCCTTGACAAAAACAGTTTATCTAAAGAAATTAGATGAATTTTTAACTAAATCATATAT
ATGTCATAAATATATTTTAGTATCAAACTCTAGTATGGACCAAAAATTATTAGAGGTATATAATCTTACT
CCAGAAGAAAAAAATGAATTAAAATCATGTGATCCATTAGATTTATTATTTAATATTCAAAATAACATAC
CTGCTATGTATTCATTATATGATAGTATGAACAATGATTTACAACATCTCTTTTTTGAATTATATCAAAA
GGAAATGATTTATTATTTACATAAACTAAAAGAGGAAAATCACATCAAAAAATTATTAGAGGAGCAAAAA
CAAATAACTGGAACATCATCTACATCCAGTCCTGGAAATACAACCGTAAATACTGCTCAATCCGCAACTC
ACAGTAATTCCCAAAACCAACAATCAAATGCATCCTCTACCAATACCCAAAATGGTGTAGCTGTATCATC
TGGTCCTGCTGTAGTTGAAGAAAGTCATGATCCCTTAACAGTATTGTCTATTAGTAACGATTTGAAAGGT
ATTGTTAGTCTCTTAAATCTTGGAAATAAAACTAAAGTACCTAATCCATTAACCATTTCTACAACAGAGA
TGGAAAAATTTTATGAGAATATTTTAAAAAATAATGATACCTATTTTAATGATGATATCAAACAATTCGT
AAAATCTAATTCAAAAGTAATTACAGGTTTGACCGAAACACAAAAAAATGCATTAAATGATGAAATTAAA
AAATTAAAAGATACTTTACAGTTATCATTTGATTTATATAATAAATATAAATTAAAATTAGATAGATTAT
TTAATAAGAAAAAAGAACTTGGCCAAGACAAAATGCAAATTAAAAAACTTACTTTATTAAAAGAACAATT
AGAATCAAAATTGAATTCACTTAATAACCCACATAATGTATTACAAAACTTTTCTGTTTTCTTTAACAAA
AAAAAAGAAGCTGAAATAGCAGAAACTGAAAACACATTAGAAAACACAAAAATATTATTGAAACATTATA
AAGGACTTGTTAAATATTATAATGGTGAATCATCTCCATTAAAAACTTTAAGTGAAGTATCAATTCAAAC
AGAAGATAATTATGCCAATTTAGAAAAATTTAGAGTATTAAGTAAAATAGATGGAAAACTCAATGATAAT
TTACATTTAGGAAAGAAAAAATTATCTTTCTTATCAAGTGGATTACATCATTTAATTACTGAATTAAAAG
AAGTAATAAAAAATAAAAATTATACAGGTAATTCTCCAAGTGAAAATAATAAGAAAGTTAACGAAGCTTT
AAAATCTTACGAAAATTTTCTCCCAGAAGCAAAAGTTACAACAGTTGTAACTCCACCTCAACCAGATGTA
ACTCCATCTCCATTATCTGTAAGGGTAAGTGGTAGTTCAGGATCCACAAAAGAAGAAACACAAATACCAA
CTTCAGGCTCTTTATTAACAGAATTACAACAAGTAGTACAATTACAAAATTATGACGAAGAAGATGATTC
CTTAGTTGTATTACCCATTTTTGGAGAATCCGAAGATAATGACGAATATTTAGATCAAGTAGTAACTGGA
GAAGCAATATCTGTCACAATGGATAATATCCTCTCAGGATTTGAAAATGAATATGATGTTATATATTTAA
AACCTTTAGCTGGAGTATATAGAAGCTTAAAAAAACAAATTGAAAAAAACATTTTTACATTTAATTTAAA
TTTGAACGATATCTTAAATTCACGTCTTAAGAAACGAAAATATTTCTTAGATGTATTAGAATCTGATTTA
ATGCAATTTAAACATATATCCTCAAATGAATACATTATTGAAGATTCATTTAAATTATTGAATTCAGAAC
AAAAAAACACACTTTTAAAAAGTTACAAATATATAAAAGAATCAGTAGAAAATGATATTAAATTTGCACA
GGAAGGTATAAGTTATTATGAAAAGGTTTTAGCGAAATATAAGGATGATTTAGAATCAATTAAAAAAGTT
ATCAAAGAAGAAAAGGAGAAGTTCCCATCATCACCACCAACAACACCTCCGTCACCAGCAAAAACAGACG
AACAAAAGAAGGAAAGTAAGTTCCTTCCATTTTTAACAAACATTGAGACCTTATACAATAACTTAGTTAA
TAAAATTGACGATTACTTAATTAACTTAAAGGCAAAGATTAACGATTGTAATGTTGAAAAAGATGAAGCA
CATGTTAAAATAACTAAACTTAGTGATTTAAAAGCAATTGATGACAAAATAGATCTTTTTAAAAACCATA
ACGACTTCGAAGCAATTAAAAAATTGATAAATGATGATACGAAAAAAGATATGCTTGGCAAATTACTTAG
TACAGGATTAGTTCAAAATTTTCCTAATACAATAATATCAAAATTAATTGAAGGAAAATTCCAAGATATG
TTAAACATTTCACAACACCAATGCGTAAAAAAACAATGTCCACAAAATTCTGGATGTTTCAGACATTTAG
ATGAAAGAGAAGAATGTAAATGTTTATTAAATTACAAACAAGAAGGTGATAAATGTGTTGAAAATCCAAA
TCCTACTTGTAACGAAAATAATGGTGGATGTGATGCAGATGCCAAATGTACCGAAGAAGATTCAGGTAGC
AACGGAAAGAAAATCACATGTGAATGTACTAAACCTGATTCTTATCCATTTTTCGATGGTATTTTCTGCA
GTTCCTCTAACTTCTTAGGAATATCATTCTTATTAATACTCATGTTAATATTATACAGTTTCATTTAA

>AB502463.1 Plasmodium falciparum msp1 gene for merozoite surface protein-1, complete cds, isolate: Tz98-048
ATGAAGATCATATTCTTTTTATGTTCATTTCTTTTTTTTATTATAAATACACAATGTGTAACACATGAAA
GTTATCAAGAACTTGTCAAAAAACTAGAAGCTTTAGAAGATGCAGTATTGACAGGTTATGGTTTATTTCA
TAAGGAAAAAATGATCTTAAATGAAGAAGAAATTACTACAAAAGGTGCAAGTGCTCAAAGTGGTACAAGT
GGTACAAGTGGTACAAGTGGTACAAGTGGTACAAGTGGTACAAGTGGTCCAAGTGGTACAAGTCCATCAT
CTCGTTCAAACACTTTACCTCGTTCAAATACTTCATCTGGTGCAAGCCCTCCAGCTGATGCAAGCCCTCC
AGCTGATGCAAGCGATTCAGATGCTAAATCTTACGCTGATTTAAAACACAGAGTACGAAATTACTTGTTC
ACTATTAAAGAACTCAAATATCCCGAACTCTTTGATTTAACCAATCATATGTTAACTTTGTGTGATAATA
TTCATGGTTTCAAATATTTAATTGATGGATATGAAGAAATTAATGAATTATTATATAAATTAAACTTTTA
TTTTGATTTATTAAGAGCAAAATTAAATGATGTATGTGCCAATAGTTATTGTCAAATACCTTTCAATCTT
AAAATTCGTGCAAATGAATTAGACGTACTTAAAAAACTTGTGTTCGGATATAGAAAACCATTAGACAATA
TTAAAGATAATGTAGGAAAAATGGAAGATTACATTAAAAAAAATAAAACAACCATAGCAAATATAAATGA
ATTAATTGAAGGAAGTAAGAAAACAATTGATCAAAATAAGAATGCAGATAATGAAGAAGGAAAAAAAAAA
TTATACCAAGCTCAATATGATCTTTCTATTTACAATAAACAATTAGAAGAAGCACATAATTTAATAAGCG
TTTTAGAAAAACGTATTGACACTTTAAAAAAAAATGAAAACATAAAGAAATTACTTGAAGATATAGATAA
AATTAAAACAGATGCCGAAAAACTCACTACTGGAAGTAAACCAAATACTCTCCTTGATAAGAACAAAAAA
ATCGAGGAACACGAAGAAAAAATAAAAGAAATTGCCAAAACTATTAAATTTAACATTGATAGTTTATTTA
CTGATCCACTTGAATTAGAATATTATTTAAGAGAAAAAAATAAAAAAGTTGATGTAACACCTAAATCACA
AGATCCTACGAAATCTGTTCAAATACCAAAAGTTCCTTATCCAAATGGTATTGTATATCCTTTACCACTC
ACTGATATTCATAATTCATTAGCTGCAGATAATGATAAAAATTCATATGGTGATTTAATGAATCCTGATA
CTAAAGAAAAAATTAATGAAAAAATTATTACAGATAATAAGGAAAGAAAAATATTCATTAATAACATTAA
AAAACAAATTGATTTAGAAGAAAAAAACATTAATCACACAAAAGAACAAAATAAAAAATTACTTGAAGAT
TATGAAAAGTCAAAAAAGGATTATGAAGAATTACTTGAAAAATTTTATGAAATGAAATTTAATAATAATT
TTAACAAAGATGTCGTAGATAAAATGTTCAGTGCAAGATATACATATAATGTTGAAAAACAAAGATATAA
TAATAAATTTTCATCCTCTAATAATTCTGTATATAATGTTCAAAAATTAAAAAAGGCTCTTTCATATCTT
GAAGATTATTCTTTAAGAAAAGGAATTTCTGAAAAAGATTTTAATCATTATTATACTTTGAAAACTGGCC
TCGAAGCTGATATAAAAAAATTAACAGAAGAAATAAAGAGTAGTGAAAACAAAATTCTAGAAAAAAATTT
TAAAGGACTAACACATTCAGCAAATGCTTCCTTAGAAGTATATGATATTGTAAAATTACAAGTACAAAAA
GTTTTATTAATTAAAAAAATAGAAGACTTAAGAAAGATAGAATTATTTTTAAAAAATGCACAACTAAAAG
ATAGTATTCATGTACCAAATATTTATAAACCACAAAATAAACCAGAACCATATTATTTAATTGTATTAAA
AAAAGAAGTAGATAAATTAAAAGAATTTATACCAAAAGTAAAAGACATGTTAAAGAAAGAACAAGCTGTC
TTATCAAGTATTACACAACCTTTAGTTGCAGCAAGCGAAACAACTGAAGATGGGGGTCACTCCACACACA
CATTATCCCAATCAGGAGAAACAGAAGTAACAGAAGAAACAGAAGAAACAGAAGAAACAGAAGAAACAGT
AGGACACACAACAACGGTAACAATAACATTACCACCAACACAACCATCACCACCAAAAGAAGTAAAAGTT
GTTGAAAATTCAATAGAACATAAGAGTAATGACAATTCACAAGCCTTGACAAAAACAGTTTATCTAAAGA
AATTAGATGAATTTTTAACTAAATCATATATATGTCATAAATATATTTTAGTATCAAACTCTAGTATGGA
CCAAAAATTATTAGAGGTATATAATCTTACTCCAGAAGAAAAAAATGAATTAAAATCATGTGATCCATTA
GATTTATTATTTAATATTCAAAATAACATACCTGCTATGTATTCATTATATGATAGTATGAACAATGATT
TACAACATCTCTTTTTTGAATTATATCAAAAGGAAATGATTTATTATTTACATAAACTAAAAGAGGAAAA
TCACATCAAAAAATTATTAGAGGAGCAAAAACAAATAACTGGAACATCATCTACATCCAGTCCTGGAAAT
ACAACCGTAAATACTGCTCAATCCGCAACTCACAGTAATTCCCAAAACCAACAATCAAATGCATCCTCTA
CCAATACCCAAAATGGTGTAGCTGTATCATCTGGTCCTGCTGTAGTTGAAGAAAGTCATAATCCCTTAAC
AGTATTGTCTATTAGTAACGATTTGAAAGGTATTGTTAGTCTCTTAAATCTTGGAAATAAAACTAAAGTA
CCTAATCCATTAACCATTTCTACAACAGAGATGGAAAAATTTTATGAGAATATTTTAAAAAATAATGATA
CCTATTTTAATGATGATATCAAACAATTCGTAAAATCTAATTCAAAAGTAATTACAGGTTTGACCGAAAC
ACAAAAAAATGCATTAAATGATGAAATTAAAAAATTAAAAGATACTTTACAGTTATCATTTGATTTATAT
AATAAATATAAATTAAAATTAGATAGATTATTTAATAAGAAAAAAGAACTTGGCCAAGACAAAATGCAAA
TTAAAAAACTTACTTTATTAAAAGAACAATTAGAATCAAAATTGAATTCACTTAATAACCCACATAATGT
ATTACAAAACTTTTCTGTTTTCTTTAACAAAAAAAAAGAAGCTGAAATAGCAGAAACTGAAAACACATTA
GAAAACACAAAAATATTATTGAAACATTATAAAGGACTTGTTAAATATTATAATGGTGAATCATCTCCAT
TAAAAACTTTAAGTGAAGTATCAATTCAAACAGAAGATAATTATGCCAATTTAGAAAAATTTAGAGTATT
AAGTAAAATAGATGGAAAACTCAATGATAATTTACATTTAGGAAAGAAAAAATTATCTTTCTTATCAAGT
GGATTACATCATTTAATTACTGAATTAAAAGAAGTAATAAAAAATAAAAATTATACAGGTAATTCTCCAA
GTGAAAATAATAAGAAAGTTAACGAAGCTTTAAAATCTTACGAAAATTTTCTCCCAGAAGCAAAAGTTAC
AACAGTTGTAACTCCACCTCAACCAGATGTAACTCCATCTCCATTATCTGTAAGGGTAAGTGGTAGTTCA
GGATCCACAAAAGAAGAAACACAAATACCAACTTCAGGCTCTTTATTAACAGAATTACAACAAGTAGTAC
AATTACAAAATTATGACGAAGAAGATGATTCCTTAGTTGTATTACCCATTTTTGGAGAATCCGAAGATAA
TGACGAATATTTAGATCAAGTAGTAACTGGAGAAGCAATATCTGTCACAATGGATAATATCCTCTCAGGA
TTTGAAAATGAATATGATGTTATATATTTAAAACCTTTAGCTGGAGTATATAGAAGCTTAAAAAAACAAA
TTGAAAAAAACATTTTTACATTTAATTTAAATTTGAACGATATCTTAAATTCACGTCTTAAGAAACGAAA
ATATTTCTTAGATGTATTAGAATCTGATTTAATGCAATTTAAACATATATCCTCAAATGAATACATTATT
GAAGATTCATTTAAATTATTGAATTCAGAACAAAAAAACACACTTTTAAAAAGTTACAAATATATAAAAG
AATCAGTAGAAAATGATATTAAATTTGCACAGGAAGGTATAAGTTATTATGAAAAGGTTTTAGCGAAATA
TAAGGATGATTTAGAATCAATTAAAAAAGTTATCAAAGAAGAAAAGGAGTTCCCATCATCACCACCAACA
ACACCTCCGTCACCAGCAAAAACAGACGAACAAAAGAAGGAAAGTAAGTTCCTTCCATTTTTAACAAACA
TTGAGACCTTATACAATAACTTAGTTAATAAAATTGACGATTACTTAATTAACTTAAAGGCAAAGATTAA
CGATTGTAATGTTGAAAAAAATGAAGCACATGTTAAAATAACTAAACTTAGTGATTTAAAAGCAATTGAT
GACAAAATAGATCTTTTTAAAAACCATAACGACTTCGAAGCAATTAAAAAATTGATAAATGATGATACGA
AAAAAGATATGCTTGGCAAATTACTTAGTACAGGATTAGTTCAAAATTTTCCTAATACAATAATATCAAA
ATTAATTGAAGGAAAATTCCAAGATATGTTAAACATTTCACAACACCAATGCGTAAAAAAACAATGTCCA
GAAAATTCTGGATGTTTCAGACATTTAGATGAAAGAGAAGAATGTAAATGTTTATTAAATTACAAACAAG
AAGGTGATAAATGTGTTGAAAATCCAAATCCTACTTGTAACGAAAATAATGGTGGATGTGATGCAGATGC
CAAATGTACCGAAGAAGATTCAGGTAGCAACGGAAAGAAAATCACATGTGAATGTACTAAACCTGATTCT
TATCCACTTTTCGATGGTATTTTCTGCAGTTCCTCTAACTTCTTAGGAATATCATTCTTATTAATACTCA
TGTTAATATTATACAGTTTCATTTAA

>AB502464.1 Plasmodium falciparum msp1 gene for merozoite surface protein-1, complete cds, isolate: Tz98-049
ATGAAGATCATATTCTTTTTATGTTCATTTCTTTTTTTTATTATAAATACACAATGTGTAACACATGAAA
GTTATCAAGAACTTGTCAAAAAACTAGAAGCTTTAGAAGATGCAGTATTGACAGGTTATAGTTTATTTCA
AAAGGAAAAAATGGTATTAAATGAAGAAGAAATTACTACAAAAGGTGCAAGTGCTCAAAGTGGTGCAAGT
GCTCAAAGTGGTGCAAGTGCTCAAAGTGGTGCAAGTGCTCAAAGTGGTGCAAGTGCTCAAAGTGGTACAA
GTGGTCCAAGTGGTCCAAGTGGTACAAGTCCATCATCTCGTTCAAACACTTTACCTCGTTCAAATACTTC
ATCTGGTGCAAGCCCTCCAGCTGATGCAAGCGATTCAGATGCTAAATCTTACGCTGATTTAAAACACAGA
GTACGAAATTACTTGTTCACTATTAAAGAACTCAAATATCCCGAACTCTTTGATTTAACCAATCATATGT
TAACTTTGTGTGATAATATTCATGGTTTCAAATATTTAATTGATGGATATGAAGAAATTAATGAATTATT
ATATAAATTAAACTTTTATTTTGATTTATTAAGAGCAAAATTAAATGATGTATGTGCTAATGATTATTGT
CAAATACCTTTCAATCTTAAAATTCGTGCAAATGAATTAGACGTACTTAAAAAACTTGTGTTCGGATATA
GAAAACCATTAGACAATATTAAAGATAATGTAGGAAAAATGGAAGATTACATTAAAAAAAATAAAACAAC
CATAGCAAATATAAATGAATTAATTGAAGGAAGTAAGAAAACAATTGATCAAAATAAGAATGCAGATAAT
GAAGAAGGAAAAAAAAAATTATACCAAGCTCAATATGATCTTTCTATTTACAATAAACAATTAGAAGAAG
CACATAATTTAATAAGCGTTTTAGAAAAACGTATTGACACTTTAAAAAAAAATGAAAACATAAAGAAATT
ACTTGAAGATATAGATAAAATTAAAACAGATGCCGAAAAACTCACTACTGGAAGTAAACCAAATACTCTC
CTTGATAAGAACAAAAAAATCGAGGAACACGAAGAAAAAATAAAAGAAATTGCCAAAACTATTAAATTTA
ACATTGATAGTTTATTTACTGATCCACTTGAATTAGAATATTATTTAAGAGAAAAAAATAAAAAAGTTGA
TGTAACACCTAAATCACAAGATCCTACGAAATCTGTTCAAATACCAAAAGTTCCTTATCCAAATGGTATT
GTATATCCTTTACCACTCACTGATATTCATAATTCATTAGCTGCAGATAATGATAAAAATTCATATGGTG
ATTTAATGAATCCTGATACTAAAGAAAAAATTAATGAAAAAATTATTACAGATAATAAGGAAAGAAAAAT
ATTCATTAATAACATTAAAAAACAAATTGATTTAGAAGAAAACAACATTAATCACACAAAAGAACAAAAT
AAAAAATTACTTGAAGATTATGAAAAGTCAAAAAAGGATTATGAAGAATTACTTGAAAAATTTTATGAAA
TGAAATTTAATAATAATTTTGACAAAGATGTCGTAGATAAAATATTCAGTGCAAGATATACATATAATGT
TGAAAAACAAAGATATAATAATAAATTTTCATCCTCTAATAATTCTGTATATAATGTTCAAAAATTAAAA
AAGGCTCTTTCATATCTTGAAGATTATTCTTTAAGAAAAGGAATTTCTGAAAAAGATTTTAATCATTATT
ATACTTTGAAAACTGGCCTCGAAGCTGATATAAAAAAATTAACAGAAGAAATAAAGAGTAGTGAAAACAA
AATTCTAGAAAAAAATTTTAAAGGACTAACACATTCAGCAAATGCTTCCTTAGAAGTATATGATATTGTA
AAATTACAAGTACAAAAAGTTTTATTAATTAAAAAAATAGAAGACTTAAGAAAGATAGAATTATTTTTAA
AAAATGCACAACTAAAAGATAGTATTCATGTACCAAATATTTATAAACCACAAAATAAACCAGAACCATA
TTATTTAATTGTATTAAAAAAAGAAGTAGATAAATTAAAAGAATTTATACCAAAAGTAAAAGACATGTTA
AAGAAAGAACAAGCTGTCTTATCAAGTATTACACAACCTTTAGTTGCAGCAAGCGAAACAACTGAAGATG
GGGGTCACTCCACACACACATTATCCCAATCAGGAGAAACAGAAGTAACAGAAGAAACAGAAGAAACAGT
AGGACACACAACAACGGTAACAATAACATTACCACCAAAAGAAGTAAAAGTTGTTGAAAATTCAATAGAA
CATAAGAGTAATGACAATTCACAAGCCTTGACAAAAACAGTTTATCTAAAGAAATTAGATGAATTTTTAA
CTAAATCATATATATGTCATAAATATATTTTAGTATCAAATTCTAGTATGGACCAAAAATTATTAGAGGT
ATATAATCTTACTCCAGAAGAAAAAAATGAATTAAAATCATGTGATCCATTAGATTTATTATTTAATATT
CAAAATAACATACCTGCTATGTATTCATTATATGATAGTATGAACAATGATTTACAACATCTCTTTTTTG
AATTATATCAAAAGGAAATGATTTATTATTTACATAAACTAAAAGAGGAAAATCACATCAAAAAATTATT
AGAGGAGCAAAAACAAATAACTGGAACATCATCTACATCCAGTCCTGGAAATACAACCGTAAATACTGCT
CAATCCGCAACTCACAGTAATTCCCAAAACCAACAATCAAATGCATCCTCTACCAATACCCAAAATGGTG
TAGCTGTATCATCTGGTCCTGCTGTAGTTGAAGAAAGTCATGATCCCTTAACAGTATTGTCTATTAGTAA
CGATTTGAAAGGTATTGTTAGTCTCTTAAATCTTGGAAATAAAACTAAAGTACCTAATCCATTAACCATT
TCTACAACAGAGATGGAAAAATTTTATGAGAATATTTTAAAAAATAATGATACCTATTTTAATGATGATA
TCAAACAATTCGTAAAATCTAATTCAAAAGTAATTACAGGTTTGACCGAAACACAAAAAAATGCATTAAA
TGATGAAATTAAAAAATTAAAAGATACTTTACAGTTATCATTTGATTTATATAATAAATATAAATTAAAA
TTAGATAGATTATTTAATAAGAAAAAAGAACTTGGCCAAGACAAAATGCAAATTAAAAAACTTACTTTAT
TAAAAGAACAATTAGAATCAAAATTGAATTCACTTAATAACCCACATAATGTATTACAAAACTTTTCTGT
TTTCTTTAACAAAAAAAAAGAAGCTGAAATAGCAGAAACTGAAAACACATTAGAAAACACAAAAATATTA
TTGAAACATTATAAAGGACTTGTTAAATATTATAATGGTGAATCATCTCCATTAAAAACTTTAAGTGAAG
TATCAATTCAAACAGAAGATAATTATGCCAATTTAGAAAAATTTAGAGTATTAAGTAAAATAGATGGAAA
ACTCAATGATAATTTACATTTAGGAAAGAAAAAATTATCTTTCTTATCAAGTGGATTACATCATTTAATT
ACTGAATTAAAAGAAGTAATAAAAAATAAAAATTATACAGGTAATTCTCCAAGTGAAAATAATAAGAAAG
TTAACGAAGCTTTAAAATCTTACGAAAATTTTCTCCCAGAAGCAAAAGTTACAACAGTTGTAACTCCACC
TCAACCAGATGTAACTCCATCTCCATTATCTGTAAGGGTAAGTGGTAGTTCAGGATCCACAAAAGAAGAA
ACACAAATACCAACTTCAGGCTCTTTATTAACAGAATTACAACAAGTAGTACAATTACAAAATTATGACG
AAGAAGATGATTCCTTAGTTGTATTACCCATTTTTGGAGAATCCGAAGATAATGACGAATATTTAGATCA
AGTAGTAACTGGAGAAGCAATATCTGTCACAATGGATAATATCCTCTCAGGATTTGAAAATGAATATGAT
GTTATATATTTAAAACCTTTAGCTGGAGTATATAGAAGCTTAAAAAAACAAATTGAAAAAAACATTTTTA
CATTTAATTTAAATTTGAACGATATCTTAAATTCACGTCTTAAGAAACGAAAATATTTCTTAGATGTATT
AGAATCTGATTTAATGCAATTTAAACATATATCCTCAAATGAATACATTATTGAAGATTCATTTAAATTA
TTGAATTCAGAACAAAAAAACACACTTTTAAAAAGTTACAAATATATAAAAGAATCAGTAGAAAATGATA
TTAAATTTGCACAGGAAGGTATAAGTTATTATGAAAAGGTTTTAGCGAAATATAAGGATGATTTAGAATC
AATTAAAAAAGTTATCAAAGAAGAAAAGGAGAAGTTCCCATCATCACCACCAACAACACCTCCGTCACCA
GCAAAAACAGACGAACAAAAGAAGGAAAGTAAGTTCCTTCCATTTTTAACAAACATTGAGACCTTATACA
ATAACTTAGTTAATAAAATTGACGATTACTTAATTAACTTAAAGGCAAAGATTAACGATTGTAATGTTGA
AAAAAATGAAGCACATGTTAAAATAACTAAACTTAGTGATTTAAAAGCAATTGATGACAAAATAGATCTT
TTTAAAAACCATAACGACTTCGAAGCAATTAAAAAATTGATAAATGATGATACGAAAAAAGATATGCTTG
GCAAATTACTTAGTACAGGATTAGTTCAAAATTTTCCTAATACAATAATATCAAAATTAATTGAAGGAAA
ATTCCAAGATATGTTAAACATTTCACAACACCAATGCGTAAAAAAACAATGTCCAGAAAATTCTGGATGT
TTCAGACATTTAGATGAAAGAGAAGAATGTAAATGTTTATTAAATTACAAACAAGAAGGTGATAAATGTG
TTGAAAATCCAAATCCTACTTGTAACGAAAATAATGGTGGATGTGATGCAGATGCCAAATGTACCGAAGA
AGATTCAGGTAGCAACGGAAAGAAAATCACATGTGAATGTACTAAACCTGATTCTTATCCACTTTTCGAT
GGTATTTTCTGCAGTTCCTCTAACTTCTTAGGAATATCATTCTTATTAATACTCATGTTAATATTATACA
GTTTCATTTAA

>AB502465.1 Plasmodium falciparum msp1 gene for merozoite surface protein-1, complete cds, isolate: Tz98-070
ATGAAGATCATATTCTTTTTATGTTCATTTCTTTTTTTTATTATAAATACACAATGTGTAACACATGAAA
GTTATCAAGAACTTGTCAAAAAACTAGAAGCTTTAGAAGATGCAGTATTGACAGGTTATAGTTTATTTCA
AAAGGAAAAAATGGTATTAAATGAAGGAACAAGTGGAACAGCTGTTACAACTAGTACACCTGGTTCAAAG
GGTTCAGTTGCTTCAGGTGGTTCAGTTGCTTCAGGTGGTTCAGTTGCTTCAGGTGGCTCAGTTGCTTCAG
GTGGCTCAGTTGCTTCAGGTGGCTCAGTTGCTTCAGGTGGTTCAGGTAATTCAAGACGTACAAATCCTTC
AGATAATTCAAGTGATTCAGATGCTAAATCTTACGCTGATTTAAAACATAGAGTTCAAAATTACTTGTTC
ACTATTAAAGAACTCAAATATCCCGAACTCTTTGATTTAACCAATCATATGTTAACTTTGTGTGATAATA
TTCATGGTTTCAAATATTTAATTGATGGATATGAAGAAATTAATGAATTATTATATAAATTAAACTTTTA
TTTTGATTTATTAAGAGCCAAATTAAATGATGTATGTGCTAATGATTATTGTCAAATACCTTTCAATCTT
AAAATTCGTGCAAATGAATTAGACGTACTTAAAAAACTTGTGTTCGGATATAGAAAACCATTAGACAATA
TTAAAGATAATGTAGGAAAAATGGAAGATTACATTAAAAAAAATAAAACAACCATAGCAAATATAAATGA
ATTAATTGAAGGAAGTAAGAAAACAATTGATCAAAATAAGAATGCAGATAATGAAGAAGGAAAAAAAAAA
TTATACCAAGCTCAATATGATCTTTCTATTTACAATAAACAATTAGAAGAAGCACATAATTTAATAAGCG
TTTTAGAAAAACGTATTGACACTTTAAAAAAAAATGAAAACATAAAGAAATTACTTGAAGATATAGATAA
AATTAAAACAGATGCCGAAAAACTCACTACTGGAAGTAAACCAAATACTCTCCTTGATAAGAACAAAAAA
ATCGAGGAACACGAAGAAAAAATAAAAGAAATTGCCAAAACTATTAAATTTAACATTGATAGTTTATTTA
CTGATCCACTTGAATTAGAATATTATTTAAGAGAAAAAAATAAAAAAGTTGATGTAACACCTAAATCACA
AGATCCTACGAAATCTGTTCAAATACCAAAAGTTCCTTATCCAAATGGTATTGTATATCCTTTACCACTC
ACTGATATTCATAATTCATTAGCTGCAGATAATGATAAAAATTCATATGGTGATTTAATGAATCCTGATA
CTAAAGAAAAAATTAATGAAAAAATTATTACAGATAATAAGGAAAGAAAAATATTCATTAATAACATTAA
AAAACAAATTGATTTAGAAGAAAAAAAAATTAATCACACAAAAGAACAAAATAAAAAATTACTTGAAGAT
TATGAAAAGTCAAAAAAGGATTATGAAGAATTACTTGAAAAATTTTATGAAATGAAATTTAATAATAATT
TTGACAAAGATGTCGTAGATAAAATGTTCAGTGCAAGATATACATATAATGTTGAAAAACAAAGATATAA
TAATAAATTTTCATCCTCTAATAATTCTGTATATAATGTTCAAAAATTAAAAAAGGCTCTTTCATATCTT
GAAGATTATTCTTTAAGAAAAGGAATTTCTGAAAAAGATTTTAATCATTATTATACTTTGAAAACTGGCC
TCGAAGCTGATATAAAAAAATTAACAGAAGAAATAAAGAGTAGTGAAAACAAAATTCGAGAAAAAAATTT
TAAAGGACTAACACATTCAGCAAATGCTTCCTTAGAAGTATCTGATATTGTAAAATTACAAGTACAAAAA
GTTTTATTAATTAAAAAAATAGAAGACTTAAGAAAGATAGAATTATTTTTAAAAAATGCACAACTAAAAG
ATAGTATTCATGTACCAAATATTTATAAACCACAAAATAAACCAGAACCATATTATTTAATTGTATTAAA
AAAAGAAGTAGATAAATTAAAAGAATTTATACCAAAAGTAAAAGACATGTTAAAGAAAGAACAAGCTGTC
TTATCAAGTATTACACAACCTTTAGTTGCAGCAAGCGAAACAACTGAAGATGGGGGTCACTCCACACACA
CATTATCCCAATCAGGAGAAACAGAAGTAACAGAAGAAACAGAAGAAACAGTAGGACACACAACAACGGT
AACAATAACATTACCACCAAAAGAAGTAAAAGTTGTTGAAAATTCAATAGAACATAAGAGTAATGACAAT
TCACAAGCCTTGACAAAAACAGTTTATCTAAAGAAATTAGATGAATTTTTAACTAAATCATATATATGTC
ATAAATATATTTTAGTATCAAACTCTAGTATGGACCAAAAATTATTAGAGGTATATAATCTTACTCCAGA
AGAAAAAAATGAATTAAAATCATGTGATCCATTAGATTTATTATTTAATATTCAAAATAACATACCTGCT
ATGTATTCATTATATGATAGTATGAACAATGATTTACAACATCTCTTTTTTGAATTATATCAAAAGGAAA
TGATTTATTATTTACATAAACTAAAAGAGGAAAATCACATCAAAAAATTATTAGAGGAGCAAAAACAAAT
AACTGGAACATCATCTACATCCAGTCCTGGAAATACAACCGTAAATACTGCTCAATCCGCAACTCACAGT
AATTCCCAAAACCAACAATCAAATGCATCCTCTACCAATACCCAAAATGGTGTAGCTGTATCATCTGGTC
CTGCTGTAGTTGAAGAAAGTCATGATCCCTTAACAGTATTGTCTATTAGTAACGATTTGAAAGGTATTGT
TAGTCTCTTAAATCTTGGAAATAAAACTAAAGTACCTAATCCATTAACCATTTCTACAACAGAGATGGAA
AAATTTTATGAGAATATTTTAAAAAATAATGATACCTATTTTAATGATGATATCAAACAATTCGTAAAAT
CTAATTCAAAAGTAATTACAGGTTTGACCGAAACACAAAAAAATGCATTAAATGATGAAATTAAAAAATT
AAAAGATACTTTACAGTTATCATTTGATTTATATAATAAATATAAATTAAAATTAGATAGATTATTTAAT
AAGAAAAAAGAACTTGGCCAAGACAAAATGCAAATTAAAAAACTTACTTTATTAAAAGAACAATTAGAAT
CAAAATTGAATTCACTTAATAACCCACATAATGTATTACAAAACTTTTCTGTTTTCTTTAACAAAAAAAA
AGAAGCTGAAATAGCAGAAACTGAAAACACATTAGAAAACACAAAAATATTATTGAAACATTATAAAGGA
CTTGTTAAATATTATAATGGTGAATCATCTCCATTAAAAACTTTAAGTGAAGTATCAATTCAAACAGAAG
ATAATTATGCCAATTTAGAAAAATTTAGAGTATTAAGTAAAATAGATGGAAAACTCAATGATAATTTACA
TTTAGGAAAGAAAAAATTATCTTTCTTATCAAGTGGATTACATCATTTAATTACTGAATTAAAAGAAGTA
ATAAAAAATAAAAATTATACAGGTAATTCTCCAAGTGAAAATAATAAGAAAGTTAACGAAGCTTTAAAAT
CTTACGAAAATTTTCTCCCAGAAGCAAAAGTTACAACAGTTGTAACTCCACCTCAACCAGATGTAACTCC
ATCTCCATTATCTGTAAGGGTAAGTGGTAGTTCAGGATCCACAAAAGAAGAAACACAAATACCAACTTCA
GGCTCTTTATTAACAGAATTACAACAAGTAGTACAATCACAAAATTATGACGAAGAAGATGATTCCTTAG
TTGTATTACCCATTTTTGGAGAATCCGAAGATAATGACGAATATTTAGATCAAGTAGTAACTGGAGAAGC
AATATCTGTCACAATGGATAATATCCTCTCAGGATTTGAAAATGAATATGATGTTATATATTTAAAACCT
TTAGCTGGAGTATATAGAAGCTTAAAAAAACAAATTGAAAAAAACATTTTTACATTTAATTTAAATTTGA
ACGATATCTTAAATTCACGTCTTAAGAAACGAAAATATTTCTTAGATGTATTAGAATCTGATTTAATGCA
ATTTAAACATATATCCTCAAATGAATACATTATTGAAGATTCATTTAAATTATTGAATTCAGAACAAAAA
AACACACTTTTAAAAAGTTACAAATATATAAAAGAATCAGTAGAAAATGATATTAAATTTGCACAGGAAG
GTATAAGTTATTATGAAAAGGTTTTAGCGAAATATAAGGATGATTTAGAATCAATTAAAAAAGTTATCAA
AGAAGAAAAGGAGAAGTTCCCATCATCACCACCAACAACACCTCCGTCACCAGCAAAAACAGACGAACAA
AAGAAGGAAAGTAAGTTCCTTCCATTTTTAACAAACATTGAGACCTTATACAATAACTTAGTTAATAAAA
TTGACGATTACTTAATTAACTTAAAGGCAAAGATTAACGATTGTAATGTTGAAAAAAATGAAGCACATGT
TAAAATAACTAAACTTAGTGATTTAAAAGCAATTGATGACAAAATAGATCTTTTTAAAAACCCTTACGAC
TTCGAAGCAATTAAAAAATTGATAAATGATGATACGAAAAAAGATATGCTTGGCAAATTACTTAGTACAG
GATTAGTTCAAAATTTTCCTAATACAATAATATCAAAATTAATTGAAGGAAAATTCCAAGATATGTTAAA
CATTTCACAACACCAATGCGTAAAAAAACAATGTCCAGAAAATTCTGGATGTTTCAGACATTTAGATGAA
AGAGAAGAATGTAAATGTTTATTAAATTACAAACAAGAAGGTGATAAATGTGTTGAAAATCCAAATCCTA
CTTGTAACGAAAATAATGGTGGATGTGATGCAGATGCCACATGTACCGAAGAAGATTCAGGTAGCAGCAG
AAAGAAAATCACATGTGAATGTACTAAACCTGATTCTTATCCACTTTTCGATGGTATTTTCTGCAGTTCC
TCTAACTTCTTAGGAATATCATTCTTATTAATACTCATGTTAATATTATACAGTTTCATTTAA

>AB502466.1 Plasmodium falciparum msp1 gene for merozoite surface protein-1, complete cds, isolate: Tz98-072
ATGAAGATCATATTCTTTTTATGTTCATTTCTTTTTTTTATTATAAATACACAATGTGTAACACATGAAA
GTTATCAAGAACTTGTCAAAAAACTAGAAGCTTTAGAAGATGCAGTATTGACAGGTTATAGTTTATTTCA
AAAGGAAAAAATGGTATTAAAGGATGGAGCAAATACTCAAGTTGTTGCAAAGCCTGCAGATGCTGTAAGT
ACTCAAAGTGCTAAAAATCCTCCAGGTGCTACAGTACCTTCAGGTACTGCAAGTACTAAAGGTGCTATAA
GATCTCCAGATGCTGCAAATCCTTCAGATGATTCAAGTGATTCAGATGCTAAATCTTACGCTGATTTAAA
ACATAGAGTTCAAAATTACTTGTTCACTATTAAAGAACTCAAATATCCCGAACTCTTTGATTTAACCAAT
CATATGTTAACTTTGTGTGATAATATTCATGGTTTCAAATATTTAATTGATGGATATGAAGAAATTAATG
AATTATTATATAAATTAAACTTTTATTTTGATTTATTAAGAGCAAAATTAAATGATGTATGTGCTAATGA
TTATTGTCAAATACCTTTCAATCTTAAAATTCGTGCAAATGAATTAGACGTACTTAAAAAACTTGTGTTC
GGATATAGAAAACCATTAGACAATATTAAAGATAATGTAGGAAAAATGGAAGATTACATTAAAAAAAATA
AAACAACCATAGCAAATATAAATGAATTAATTGAAGGAAGTAAGAAAACAATTGATCAAAATAAGAATGC
AGATAATGAAGAAGGAAAAAAAAAATTATACCAAGCTCAATATGATCTTTTTATTTACAATAAACAATTA
CAAGAAGCACATAATTTAATAAGCGTTTTAGAAAAACGTATTGACACTTTAAAAAAAAATGAAAACATAA
AGAAATTACTTGAAGATATAGATAAAATTAAAACAGATGCCGAAAAACTCACTACTGGAAGTAAACCAAA
TACTCTCCTTGATAAGAACAAAAAAATCGAGGAACACGAAGAAAAAATAAAAGAAATTGCCAAAACTATT
AAATTTAACATTGATAGTTTATTTACTGATCCACTTGAATTAGAATATTATTTAAGAGAAAAAAATAAAA
AAGTTGATGTAACACCTAAATCACAAGATCCTACGAAATCTGTTCAAATACCAAAAGTTCCTTATCCAAA
TGGTATTGTATATCCTTTACCACTCACTGATATTCATAATTCATTAGCTGCAGATAATGATAAAAATTCA
TATGGTGATTTAATGAATCCTAATACTAAAGAAAAAATTAATGAAAAAATTATTACAGATAATAAGGAAA
GAAAAATATTCATTAATAACATTAAAAAACAAATTGATTTAGAAGAAAAAAACATTAATCACACAAAAGA
ACAAAATAAAAAATTACTTGAAGATTATGAAAAGTCAAAAAAGGATTATGAAGAATTACTTGAAAAATTT
TATGAAATGAAATTTAATAATAATTTTGACAAAGATGTCGTAGATAAAATATTCAGTGCAAGATATACAT
ATAATGTTGAAAAACAAAGATATAATAATAAATTTTCATCCTCTAATAATTCTGTATATAATGTTCAAAA
ATTAAAAAAGGCTCTTTCATATCTTGAAGATTATTCTTTAAGAAAAGGAATTTCTGAAAAAGATTTTAAT
CATTATTATACTTTGAAAACTGGCCTCGAAGCTGATATAAAAAAATTAACAGAAGAAATAAAGAGTAGTG
AAAACAAAATTCTAGAAAAAAATTTTAAAGGACTAACACATTCAGCAAATGCTTCCTTAGAAGTATCTGA
TATTGTAAAATTACAAGTACAAAAAGTTTTATTAATTAAAAAAATAGAAGACTTAAGAAAGATAGAATTA
TTTTTAAAAAATGCACAACTAAAAGATAGTATTCATGTACCAAATATTTATAAACCACAAAATAAACCAG
AACCATATTATTTAATTGTATTAAAAAAAGAAGTAGATAAATTAAAAGAATTTATACCAAAAGTAAAAGA
CATGTTAAAGAAAGAACAAGCTGTCTTATCAAGTATTACACAACCTTTAGTTGCAGCAAGCGAAACAACT
GAAGATGGGGGTCACTCCACACACACATTATCCCAATCAGGAGAAACAGAAGTAACAGAAGAAACAGAAG
TAACAGAAGAAACAGAAGGACACACAACAACGGTAACAATAACATTACCACCAACACAACCATCACCACC
AAAAGAAGTAAAAGTTGTTGAAAATTCAATAGAACATAAGAGTAATGACAATTCACAAGCCTTGACAAAA
ACAGTTTATCTAAAGAAATTAGATGAATTTTTAACTAAATCATATATATGTCATAAATATATTTTAGTAT
CAAACTCTAGTATGGACCAAAAATTATTAGAGGTATATAATCTTACTCCAGAAGAAAAAAATGAATTAAA
ATCATGTGATCCATTAGATTTATTATTTAATATTCAAAATAACATACCTGCTATGTATTCATTATATGAT
AGTATGAACAATGATTTACAACATCTCTTTTTTGAATTATATCAAAAGGAAATGATTTATTATTTACATA
AACTAAAAGAGGAAAATCACATCAAAAAATTATTAGAGGAGCAAAAACAAATAACTGGAACATCATCTAC
ATCCAGTCCTGGAAATACAACCGTAAATACTGCTCAATCCGCAACTCACAGTAATTCCCAAAACCAACAA
TCAAATGCATCCTCTACCAATACCCAAAATGGTGTAGCTGTATCATCTGGTCCTGCTGTAGTTGAAGAAA
GTCATGATCCCTTAACAGTATTGTCTATTAGTAACGATTTGAAAGGTATTGTTAGTCTCTTAAATCTTGG
AAATAAAACTAAAGTACCTAATCCATTAACCATTTCTACAACAGAGATGGAAAAATTTTATGAGAATATT
TTAAAAAATAATGATACCTATTTTAATGATGATATCAAACAATTCGTAAAATCTAATTCAAAAGTAATTA
CAGGTTTGACCGAAACACAAAAAAATGCATTAAATGATGAAATTAAAAAATTAAAAGATACTTTACAGTT
ATCATTTGATTTATATAATAAATATAAATTAAAATTAGATAGATTATTTAATAAGAAAAAAGAACTTGGC
CAAGACAAAATGCAAATTAAAAAACTTACTTTATTAAAAGAACAATTAGAATCAAAATTGAATTCACTTA
ATAACCCACATAATGTATTACAAAACTTTTCTGTTTTCTTTAACAAAAAAAAAGAAGCTGAAATAGCAGA
AACTGAAAACACATTAGAAAACACAAAAATATTATTGAAACATTATAAAGGACTTGTTAAATATTATAAT
GGTGAATCATCTCCATTAAAAACTTTAAGTGAAGTATCAATTCAAACAGAAGATAATTATGCCAATTTAG
AAAAATTTAGAGTATTAAGTAAAATAGATGGAAAACTCAATGATAATTTACATTTAGGAAAGAAAAAATT
ATCTTTCTTATCAAGTGGATTACATCATTTAATTACTGAATTAAAAGAAGTAATAAAAAATAAAAATTAT
ACAGGTAATTCTCCAAGTGAAAATAATAAGAAAGTTAACGAAGCTTTAAAATCTTACGAAAATTTTCTCC
CAGAAGCAAAAGTTACAACAGTTGTAACTCCACCTCAACCAGATGTAACTCCATCTCCATTATCTGTAAG
GGTAAGTGGTAGTTCAGGATCCACAAAAGAAGAAACACAAATACCAACTTCAGGCTCTTTATTAACAGAA
TTACAACAAGTAGTACAATTACAAAATTATGACGAAGAAGATGATTCCTTAGTTGTATTACCCATTTTTG
GAGAATCCGAAGATAATGACGAATATTTAGATCAAGTAGTAACTGGAGAAGCAATATCTGTCACAATGGA
TAATATCCTCTCAGGATTTGAAAATGAATATGATGTTATATATTTAAAACCTTTAGCTGGAGTATATAGA
AGCTTAAAAAAACAAATTGAAAAAAACATTTTTACATTTAATTTAAATTTGAACGATATCTTAAATTCAC
GTCTTAAGAAACGAAAATATTTCTTAGATGTATTAGAATCTGATTTAATGCAATTTAAACATATATCCTC
AAATGAATACATTATTGAAGATTCATTTAAATTATTGAATTCAGAACAAAAAAACACACTTTTAAAAAGT
TACAAATATATAAAAGAATCAGTAGAAAATGATATTAAATTTGCACAGGAAGGTATAAGTTATTATGAAA
AGGTTTTAGCGAAATATAAGGATGATTTAGAATCAATTAAAAAAGTTATCAAAGAAGAAAAGGAGAAGTT
CCCATCATCACCACCAACAACACCTCCGTCACCAGCAAAAACAGACGAACAAAAGAAGGAAAGTAAGTTC
CTTCCATTTTTAACAAACATTGAGACCTTATACAATAACTTAGTTAATAAAATTGACGATTACTTAATTA
ACTTAAAGGCAAAGATTAACGATTGTAATGTTGAAAAAGATGAAGCACATGTTAAAATAACTAAACTTAG
TGATTTAAAAGCAATTGATGACAAAATAGATCTTTTTAAAAACCATAACGACTTCGAAGCAATTAAAAAA
TTGATAAATGATGATACGAAAAAAGATATGCTTGGCAAATTACTTAGTACAGGATTAGTTCAAAATTTTC
CTAATACAATAATATCAAAATTAATTGAAGGAAAATTCCAAGATATGTTAAACATTTCACAACACCAATG
CGTAAAAAAACAATGTCCAGAAAATTCTGGATGTTTCAGACATTTAGATGAAAGAGAAGAATGTAAATGT
TTATTAAATTACAAACAAGAAGGTGATAAATGTGTTGAAAATCCAAATCCTACTTGTAACGAAAATAATG
GTGGATGTGATGCAGATGCCACATGTACCGAAGAAGATTCAGGTAGCAGCAGAAAGAAAATCACATGTGA
ATGTACTAAACCTGATTCTTATCCACTTTTCGATGGTATTTTCTGCAGTTCCTCTAACTTCTTAGGAATA
TCATTCTTATTAATACTCATGTTAATATTATACAGTTTCATTTAA

>AB502467.1 Plasmodium falciparum msp1 gene for merozoite surface protein-1, complete cds, isolate: Tz98-075
ATGAAGATCATATTCTTTTTATGTTCATTTCTTTTTTTTATTATAAATACACAATGTGTAACACATGAAA
GTTATCAAGAACTTGTCAAAAAACTAGAAGCTTTAGAAGATGCAGTATTGACAGGTTATAGTTTATTTCA
AAAGGAAAAAATGGTATTAAAGGATGGAGCAAATACTCAAGTTGTTGCAAAGCCTGCAGATGCTGTAAGT
ACTCAAAGTGCTAAAAATCCTCCAGGTGCTACAGTACCTTCAGGTACTGCAAGTACTAAAGGTGCTATAA
GATCTCCAGATGCTGCAAATCCTTCAGATGATTCAAGTGATTCAGATGCTAAATCTTACGCTGATTTAAA
ACATAGAGTTCAAAATTACTTGTTCACTATTAAAGAACTCAAATATCCCGAACTCTTTGATTTAACCAAT
CATATGTTAACTTTGTGTGATAATATTCATGGTTTCAAATATTTAATTGATGGATATGAAGAAATTAATG
AATTATTATATAAATTAAACTTTTATTTTGATTTATTAAGAGCAAAATTAAATGATGTATGTGCTAATGA
TTATTGTCAAATACCTTTCAATCTTAAAATTCGTGCAAATGAATTAGACGTACTTAAAAAACTTGTGTTC
GGATATAGAAAACCATTAGACAATATTAAAGATAATGTAGGAAAAATGGAAGATTACATTAAAAAAAATA
AAACAACCATAGCAAATATAAATGAATTAATTGAAGGAAGTAAGAAAACAATTGATCAAAATAAGAATGC
AGATAATGAAGAAGGAAAAAAAAAATTATACCAAGCTCAATATGATCTTTCTATTTACAATAAACAATTA
GAAGAAGCACATAATTTAATAAGCGTTTTAGAAAAACGTATTGACACTTTAAAAAAAAATGAAAACATAA
AGAAATTACTTGAAGATATAGATAAAATTAAAACAGATGCCGAAAAACCCACTACTGGAAGTAAACCAAA
TACTCTCCTTGATAAGAACAAAAAAATCGAGGAACACGAAGAAAAAATAAAAGAAATTGCCAAAACTATT
AAATTTAACATTGATAGTTTATTTACTGATCCACTTGAATTAGAATATTATTTAAGAGAAAAAAATAAAA
AAGTTGATGTAACACCTAAATCACAAGATCCTACGAAATCTGTTCAAATACCAAAAGTTCCTTATCCAAA
TGGTATTGTATATCCTTTACCACTCACTGATATTCATAATTCATTAGCTGCAGATAATGATAAAAATTCA
TATGGTGATTTAATGAATCCTAATACTAAAGAAAAAATTAATGAAAAAATTATTACAGATAATAAGGAAA
GAAAAATATTCATTAATAACATTAAAAAACAAATTGATTTAGAAGAAAAAAACATTAATCACACAAAAGA
ACAAAATAAAAAATTACTTGAAGATTATGAAAAGTCAAAAAAGGATTATGAAGAATTACTTGAAAAATTT
TATGAAATGAAATTTAATAATAATTTTAACAAAGATGTCGTAGATAAAATGTTCAGTGCAAGATATACAT
ATAATGTTGAAAAACAAAGATATAATAATAAATTTTCATCCTCTAATAATTCTGTATATAATGTTCAAAA
ATTAAAAAAGGCTCTTTCATATCTTGAAGATTATTCTTTAAGAAAAGGAATTTCTGAAAAAGATTTTAAT
CATTATTATACTTTGAAAACTGGCCTCGAAGCTGATATAAAAAAATTAACAGAAGAAATAAAGAGTAGTG
AAAACAAAATTCTAGAAAAAAATTTTAAAGGACTAACACATTCAGCAAATGCTTCCTTAGAAGTATCTGA
TATTGTAAAATTACAAGTACAAAAAGTTTTATTAATTAAAAAAATAGAAGACTTAAGAAAGATAGAATTA
TTTTTAAAAAATGCACAACTAAAAGATAGTATTCATGTACCAAATATTTATAAACCACAAAATAAACCAG
AACCATATTATTTAATTGTATTAAAAAAAGAAGTAGATAAATTAAAAGAATTTATACCAAAAGTAAAAGA
CATGTTAAAGAAAGAACAAGCTGTCTTATCAAGTATTACACAACCTTTAGTTGCAGCAAGCGAAACAACT
GAAGATGGGGGTCACTCCACACACACATTATCCCAATCAGGAGAAACAGAAGTAACAGAAGAAACAGAAG
AAACAGAAGAAACAGTAGGACACACAACAACGGTAACAATAACATTACCACCAAAAGAAGTAAAAGTTGT
TGAAAATTCAATAGAACATAAGAGTAATGACAATTCACAAGCCTTGACAAAAACAGTTTATCTAAAGAAA
TTAGATGAATTTTTAACTAAATCATATATATGTCATAAATATATTTTAGTATCAAACTCTAGTATGGACC
AAAAATTATTAGAGGTATATAATCTTACTCCAGAAGAAAAAAATGAATTAAAATCATGTGATCCATTAGA
TTTATTATTTAATATTCAAAATAACATACCTGCTATGTATTCATTATATGATAGTATGAACAATGATTTA
CAACATCTCTTTTTTGAATTATATCAAAAGGAAATGATTTATTATTTACATAAACTAAAAGAGGAAAATC
ACATCAAAAAATTATTAGAGGAGCAAAAACAAATAACTGGAACATCATCTACATCCAGTCCTGGAAATAC
AACCGTAAATACTGCTCAATCCGCAACTCACAGTAATTCCCAAAACCAACAATCAAATGCATCCTCTACC
AATACCCAAAATGGTGTAGCTGTATCATCTGGTCCTGCTGTAGTTGAAGAAAGTCATGATCCCTTAACAG
TATTGTCTATTAGTAACGATTTGAAAGGTATTGTTAGTCTCTTAAATCTTGGAAATAAAACTAAAGTACC
TAATCCATTAACCATTTCTACAACAGAGATGGAAAAATTTTATGAGAATATTTTAAAAAATAATGATACC
TATTTTAATGATGATATCAAACAATTCGTAAAATCTAATTCAAAAGTAATTACAGGTTTGACCGAAACAC
AAAAAAATGCATTAAATGATGAAATTAAAAAATTAAAAGATACTTTACAGTTATCATTTGATTTATATAA
TAAATATAAATTAAAATTAGATAGATTATTTAATAAGAAAAAAGAACTTGGCCAAGACAAAATGCAAATT
AAAAAACTTACTTTATTAAAAGAACAATTAGAATCAAAATTGAATTCACTTAATAACCCACATAATGTAT
TACAAAACTTTTCTGTTTTCTTTAACAAAAAAAAAGAAGCTGAAATAGCAGAAACTGAAAACACATTAGA
AAACACAAAAATATTATTGAAACATTATAAAGGACTTGTTAAATATTATAATGGTGAATCATCTCCATTA
AAAACTTTAAGTGAAGTATCAATTCAAACAGAAGATAATTATGCCAATTTAGAAAAATTTAGAGTATTAA
GTAAAATAGATGGAAAACTCAATGATAATTTACATTTAGGAAAGAAAAAATTATCTTTCTTATCAAGTGG
ATTACATCATTTAATTACTGAATTAAAAGAAGTAATAAAAAATAAAAATTATACAGGTAATTCTCCAAGT
GAAAATAATAAGAAAGTTAACGAAGCTTTAAAATCTTACGAAAATTTTCTCCCAGAAGCAAAAGTTACAA
CAGTTGTAACTCCACCTCAACCAGATGTAACTCCATCTCCATTATCTGTAAGGGTAAGTGGTAGTTCAGG
ATCCACAAAAGAAGAAACACAAATACCAACTTCAGGCTCTTTATTAACAGAATTACAACAAGTAGTACAA
TTACAAAATTATGACGAAGAAGATGATTCCTTAGTTGTATTACCCATTTTTGGAGAATCCGAAGATAATG
ACGAATATTTAGATCAAGTAGTAACTGGAGAAGCAATATCTGTCACAATGGATAATATCCTCTCAGGATT
TGAAAATGAATATGATGTTATATATTTAAAACCTTTAGCTGGAGTATATAGAAGCTTAAAAAAACAAATT
GAAAAAAACATTTTTACATTTAATTTAAATTTGAACGATATCTTAAATTCACGTCTTAAGAAACGAAAAT
ATTTCTTAGATGTATTAGAATCTGATTTAATGCAATTTAAACATATATCCTCAAATGAATACATTATTGA
AGATTCATTTAAATTATTGAATTCAGAACAAAAAAACACACTTTTAAAAAGTTACAAATATATAAAAGAA
TCAGTAGAAAATGATATTAAATTTGCACAGGAAGGTATAAGTTATTATGAAAAGGTTTTAGCGAAATATA
AGGATGATTTAGAATCAATTAAAAAAGTTATCAAAGAAGAAAAGGAGTTCCCATCATCACCACCAACAAC
ACCTCCGTCACCAGCAAAAACAGACGAACAAAAGAAGGAAAGTAAGTTCCTTCCATTTTTAACAAACATT
GAGACCTTATACAATAACTTAGTTAATAAAATTGACGATTACTTAATTAACTTAAAGGCAAAGATTAACG
ATTGTAATGTTGAAAAAGATGAAGCACATGTTAAAATAACTAAACTTAGTGATTTAAAAGCAATTGATGA
CAAAATAGATCTTTTTAAAAACACTGACGACTTCGAAGCAATTAAAAAATTGATAAATGATGATACGAAA
AAAGATATGCTTGGCAAATTACTTAGTACAGGATTAGTTCAAAATTTTCCTAATACAATAATATCAAAAT
TAATTGAAGGAAAATTCCAAGATATGTTAAACATTTCACAACACCAATGCGTAAAAAAACAATGTCCACA
AAATTCTGGATGTTTCAGACATTTAGATGAAAGAGAAGAATGTAAATGTTTATTAAATTACAAACAAGAA
GGTGATAAATGTGTTGAAAATCCAAATCCTACTTGTAACGAAAATAATGGTGGATGTGATGCAGATGCCA
AATGTACCGAAGAAGATTCAGGTAGCAACGGAAAGAAAATCACATGTGAATGTACTAAACCTGATTCTTA
TCCATTTTTCGATGGTATTTTCTGCAGTTCCTCTAACTTCTTAGGAATATCATTCTTATTAATACTCATG
TTAATATTATACAGTTTCATTTAA

>AB502468.1 Plasmodium falciparum msp1 gene for merozoite surface protein-1, complete cds, isolate: Tz98-084
ATGAAGATCATATTCTTTTTATGTTCATTTCTTTTTTTTATTATAAATACACAATGTGTAACACATGAAA
GTTATCAAGAACTTGTCAAAAAACTAGAAGCTTTAGAAGATGCAGTATTGACAGGTTATAGTTTATTTCA
AAAGGAAAAAATGGTATTAAATGAAGAAGAAATTACTACAAAAGGTGCAAGTGCTCAAAGTGGTGCAAGT
GCTCAAAGTGGTGCAAGTGCTCAAAGTGGTGCAAGTGCTCAAAGTGGTGCAAGTGCTCAAAGTGGTGCAA
GTGCTCAAAGTGGTACAAGTGGTCCAAGTGGTCCAAGTGGTACAAGTCCATCATCTCGTTCAAACACTTT
ACCTCGTTCAAATACTTCATCTGGTGCAAGCCCTCCAGCTGATGCAAGCGATTCAGATGCTAAATCTTAC
GCTGATTTAAAACACAGAGTACGAAATTACTTGTTCACTATTAAAGAACTCAAATATCCCGAACTCTTTG
ATTTAACCAATCATATGTTAACTTTGTGTGATAATATTCATGGTTTCAAATATTTAATTGATGGATATGA
AGAAATTAATGAATTATTATATAAATTAAACTTTTATTTTGATTTATTAAGAGCAAAATTAAATGATGTA
TGTGCTAATGATTATTGTCAAATACCTTTCAATCTTAAAATTCGTGCAAATGAATTAGACGTACTTAAAA
AACTTGTGTTCGGATATAGAAAACCATTAGACAATATTAAAGATAATGTAGGAAAAATGGAAGATTACAT
TAAAAAAAATAAAACAACCATAGCAAATATAAATGAATTAATTGAAGGAAGTAAGAAAACAATTGATCAA
AATAAGAATGCAGATAATGAAGAAGGAAAAAAAAAATTATACCAAGCTCAATATGATCTTTCTATTTACA
ATAAACAATTAGAAGAAGCACATAATTTAATAAGCGTTTTAGAAAAACGTATTGACACTTTAAAAAAAAA
TGAAAACATAAAGAAATTACTTGAAGATATAGATAAAATTAAAACAGATGCCGAAAAACCCACTACTGGA
AGTAAACCAAATACTCTCCTTGATAAGAACAAAAAAATCGAGGAACACGAAGAAAAAATAAAAGAAATTG
CCAAAACTATTAAATTTAACATTGATAGTTTATTTACTGATCCACTTGAATTAGAATATTATTTAAGAGA
AAAAAATAAAAAAGTTGATGTAACACCTAAATCACAAGATCCTACGAAATCTGTTCAAATACCAAAAGTT
CCTTATCCAAATGGTATTGTATATCCTTTACCACTCACTGATATTCATAATTCATTAGCTGCAGATAATG
ATAAAAATTCATATGGTGATTTAATGAATCCTAATACTAAAGAAAAAATTAATGAAAAAATTATTACAGA
TAATAAGGAAAGAAAAATATTCATTAATAACATTAAAAAACAAATTGATTTAGAAGAAAAAAACATTAAT
CACACAAAAGAACAAAATAAAAAATTACTTGAAGATTATGAAAAGTCAAAAAAGGATTATGAAGAATTAC
TTGAAAAATTTTATGAAATGAAATTTAATAATAATTTTAACAAAGATGTCGTAGATAAAATGTTCAGTGC
AAGATATACATATAATGTTGAAAAACAAAGATATAATAATAAATTTTCATCCTCTAATAATTCTGTATAT
AATGTTCAAAAATTAAAAAAGGCTCTTTCATATCTTGAAGATTATTCTTTAAGAAAAGGAATTTCTGAAA
AAGATTTTAATCATTATTATACTTTGAAAACTGGCCTCGAAGCTGATATAAAAAAATTAACAGAAGAAAT
AAAGAGTAGTGAAAACAAAATTCTAGAAAAAAATTTTAAAGGACTAACACATTCAGCAAATGCTTCCTTA
GAAGTATATGATATTGTAAAATTACAAGTACAAAAAGTTTTATTAATTAAAAAAATAGAAGACTTAAGAA
AGATAGAATTATTTTTAAAAAATGCACAACTAAAAGATAGTATTCATGTACCAAATATTTATAAACCACA
AAATAAACCAGAACCATATTATTTAATTGTATTAAAAAAAGAAGTAGATAAATTAAAAGAATTTATACCA
AAAGTAAAAGACATGTTAAAGAAAGAACAAGCTGTCTTATCAAGTATTACACAACCTTTAGTTGCAGCAA
GCGAAACAACTGAAGATGGGGGTCACTCCACACACACATTATCCCAATCAGGAGAAACAGAAGTAACAGA
AGAAACAGAAGAAACAGAAGAAACAGTAGGACACACAACAACGGTAACAATAACATTACCACCAACACAA
CCATCACCACCAAAAGAAGTAAAAGTTGTTGAAAATTCAATAGAACATAAGAGTAATGACAATTCACAAG
CCTTGACAAAAACAGTTTATCTAAAGAAATTAGATGAATTTTTAACTAAATCATATATATGTCATAAATA
TATTTTAGTATCAAACTCTAGTATGGACCAAAAATTATTAGAGGTATATAATCTTACTCCAGAAGAAGAA
AATGAATTAAAATCATGTGATCCATTAGATTTATTATTTAATATTCAAAATAACATACCTGCTATGTATT
CATTATATGATAGTATGAACAATGATTTACAACATCTCTTTTTTGAATTATATCAAAAGGAAATGATTTA
TTATTTACATAAACTAAAAGAGGAAAATCACATCAAAAAATTATTAGAGGAGCAAAAACAAATAACTGGA
ACATCATCTACATCCAGTCCTGGAAATACAACCGTAAATACTGCTCAATCCGCAACTCACAGTAATTCCC
AAAACCAACAATCAAATGCATCCTCTACCAATACCCAAAATGGTGTAGCTGTATCATCTGGTCCTGCTGT
AGTTGAAGAAAGTCATGATCCCTTAACAGTATTGTCTATTAGTAACGATTTGAAAGGTATTGTTAGTCTC
TTAAATCTTGGAAATAAAACTAAAGTACCTAATCCATTAACCATTTCTACAACAGAGATGGAAAAATTTT
ATGAGAATATTTTAAAAAATAATGATACCTATTTTAATGATGATATCAAACAATTCGTAAAATCTAATTC
AAAAGTAATTACAGGTTTGACCGAAACACAAAAAAATGCATTAAATGATGAAATTAAAAAATTAAAAGAT
ACTTTACAGTTATCATTTGATTTATATAATAAATATAAATTAAAATTAGATAGATTATTTAATAAGAAAA
AAGAACTTGGCCAAGACAAAATGCAAATTAAAAAACTTACTTTATTAAAAGAACAATTAGAATCAAAATT
GAATTCACTTAATAACCCACATAATGTATTACAAAACTTTTCTGTTTTCTTTAACAAAAAAAAAGAAGCT
GAAATAGCAGAAACTGAAAACACATTAGAAAACACAAAAATATTATTGAAACATTATAAAGGACTTGTTA
AATATTATAATGGTGAATCATCTCCATTAAAAACTTTAAGTGAAGTATCAATTCAAACAGAAGATAATTA
TGCCAATTTAGAAAAATTTAGAGTATTAAGTAAAATAGATGGAAAACTCAATGATAATTTACATTTAGGA
AAGAAAAAATTATCTTTCTTATCAAGTGGATTACATCATTTAATTACTGAATTAAAAGAAGTAATAAAAA
ATAAAAATTATACAGGTAATTCTCCAAGTGAAAATAATAAGAAAGTTAACGAAGCTTTAAAATCTTACGA
AAATTTTCTCCCAGAAGCAAAAGTTACAACAGTTGTAACTCCACCTCAACCAGATGTAACTCCATCTCCA
TTATCTGTAAGGGTAAGTGGTAGTTCAGGATCCACAAAAGAAGAAACACAAATACCAACTTCAGGCTCTT
TATTAACAGAATTACAACAAGTAGTACAATTACAAAATTATGACGAAGAAGATGATTCCTTAGTTGTATT
ACCCATTTTTGGAGAATCCGAAGATAATGACGAATATTTAGATCAAGTAGTAACTGGAGAAGCAATATCT
GTCACAATGGATAATATCCTCTCAGGATTTGAAAATGAATATGATGTTATATATTTAAAACCTTTAGCTG
GAGTATATAGAAGCTTAAAAAAACAAATTGAAAAAAACATTTTTACATTTAATTTAAATTTGAACGATAT
CTTAAATTCACGTCTTAAGAAACGAAAATATTTCTTAGATGTATTAGAATCTGATTTAATGCAATTTAAA
CATATATCCTCAAATGAATACATTATTGAAGATTCATTTAAATTATTGAATTCAGAACAAAAAAACACAC
TTTTAAAAAGTTACAAATATATAAAAGAATCAGTAGAAAATGATATTAAATTTGCACAGGAAGGTATAAG
TTATTATGAAAAGGTTTTAGCGAAATATAAGGATGATTTAGAATCAATTAAAAAAGTTATCAAAGAAGAA
AAGGAGAAGTCCCCATCATCACCACCAACAACACCTCCGTCACCAGCAAAAACAGACGAACAAAAGAAGG
AAAGTAAGTTCCTTCCATTTTTAACAAACATTGAGACCTTATACAATAACTTAGTTAATAAAATTGACGA
TTACTTAATTAACTTAAAGGCAAAGATTAACGATTGTAATGTTGAAAAAGATGAAGCACATGTTAAAATA
ACTAAACTTAGTGATTTAAAAGCAATTGATGACAAAATAGATCTTTTTAAAAACCATAACGACTTCGAAG
CAATTAAAAAATTGATAAATGATGATACGAAAAAAGATATGCTTGGCAAATTACTTAGTACAGGATTAGT
TCAAAATTTTCCTAATACAATAATATCAAAATTAATTGAAGGAAAATTCCAAGATATGTTAAACATTTCA
CAACACCAATGCGTAAAAAAACAATGTCCAGAAAATTCTGGATGTTTCAGACATTTAGATGAAAGAGAAG
AATGTAAATGTTTATTAAATTACAAACAAGAAGGTGATAAATGTGTTGAAAATCCAAATCCTACTTGTAA
CGAAAATAATGGTGGATGTGATGCAGATGCCAAATGTACCGAAGAAGATTCAGGTAGCAACGGAAAGAAA
ATCACATGTGAATGTACTAAACCTGATTCTTATCCACTTTTCGATGGTATTTTCTGCAGTTCCTCTAACT
TCTTAGGAATATCATTCTTATTAATACTCATGTTAATATTATACAGTTTCATTTAA

>AB502469.1 Plasmodium falciparum msp1 gene for merozoite surface protein-1, complete cds, isolate: Tz98-089
ATGAAGATCATATTCTTTTTATGTTCATTTCTTTTTTTTATTATAAATACACAATGTGTAACACATGAAA
GTTATCAAGAACTTGTCAAAAAACTAGAAGCTTTAGAAGATGCAGTATTGACAGGTTATGGTTTATTTCA
TAAGGAAAAAATGATCTTAAATGAAGGAACAAGTGGAACAGCTGTTACAACTAGTACACCTGGTTCAGGT
GGTTCAGTTGCTTCAGGTGGTTCAGGTGGTTCAGTTGCTTCAGGTGGTTCAGGTGGCTCAGTTGCTTCAG
GTGGTTCAGGTGGCTCAGTTGCTTCAGGTGGCTCAGTTGCTTCAGGTGGTTCAGGTAATTCAAGACGTAC
AAATCCTTCAGATAATTCAAGTGATTCAGATGCTAAATCTTACGCTGATTTAAAACATAGAGTTCAAAAT
TACTTGTTCACTATTAAAGAACTCAAATATCCCGAACTCTTTGATTTAACCAATCATATGTTAACTTTGT
GTGATAATATTCATGGTTTCAAATATTTAATTGATGGATATGAAGAAATTAATGAATTATTATATAAATT
AAACTTTTATTTTGATTTATTAAGAGCAAAATTAAATGATGTATGTGCTAATGATTATTGTCAAATACCT
TTCAATCTTAAAATTCGTGCAAATGAATTAGACGTACTTAAAAAACTTGTGTTCGGATATAGAAAACCAT
TAGACAATATTAAAGATAATGTAGGAAAAATGGAAGATTACATTAAAAAAAATAAAACAACCATAGCAAA
TATAAATGAATTAATTGAAGGAAGTAAGAAAACAATTGATCAAAATAAGAATGCAGATAATGAAGAAGGA
AAAAAAAAATTATACCAAGCTCAATATGATCTTTCTATTTACAATAAACAATTAGAAGAAGCACATAATT
TAATAAGCGTTTTAGAAAAACGTATTGACACTTTAAAAAAAAATGAAAACATAAAGAAATTACTTGAAGA
TATAGATAAAATTAAAACAGATGCCGAAAAACCCACTACTGGAAGTAAACCAAATACTCTCCTTGATAAG
AACAAAAAAATCGAGGAACACGAAGAAAAAATAAAAGAAATTGCCAAAACTATTAAATTTAACATTGATA
GTTTATTTACTGATCCACTTGAATTAGAATATTATTTAAGAGAAAAAAATAAAAAAGTTGATGTAACACC
TAAATCACAAGATCCTACGAAATCTGTTCAAATACCAAAAGTTCCTTATCCAAATGGTATTGTATATCCT
TTACCACTCACTGATATTCATAATTCATTAGCTGCAGATAATGATAAAAATTCATATGGTGATTTAATGA
ATCCTGATACTAAAGAAAAAATTAATGAAAAAATTATTACAGATAATAAGGAAAGAAAAATATTCATTAA
TAACATTAAAAAACAAATTGATTTAGAAGAAAAAAACATTAATCACACAAAAGAACAAAATAAAAAATTA
CTTGAAGATTATGAAAAGTCAAAAAAGGATTATGAAGAATTACTTGAAAAATTTTATGAAATGAAATTTA
ATAATAATTTTGACAAAGATGTCGTAGATAAAATGTTCAGTGCAAGATATACATATAATGTTGAAAAACA
AAGATATAATAATAAATTTTCATCCTCTAATAATTCTGTATATAATGTTCAAAAATTAAAAAAGGCTCTT
TCATATCTTGAAGATTATTCTTTAAGAAAAGGAATTTCTGAAAAAGATTTTAATCATTATTATACTTTGA
AAACTGGCCTCGAAGCTGATATAAAAAAATTAACAGAAGAAATAAAGAGTAGTGAAAACAAAATTCTAGA
AAAAAATTTTAAAGGACTAACACATTCAGCAAATGCTTCCTTAGAAGTATATGATATTGTAAAATTACAA
GTACAAAAAGTTTTATTAATTAAAAAAATAGAAGACTTAAGAAAGATAGAATTATTTTTAAAAAATGCAC
AACTAAAAGATAGTATTCATGTACCAAATATTTATAAACCACAAAATAAACCAGAACCATATTATTTAAT
TGTATTAAAAAAAGAAGTAGATAAATTAAAAGAATTTATACCAAAAGTAAAAGACATGTTAAAGAAAGAA
CAAGCTGTCTTATCAAGTATTACACAACCTTTAGTTGCAGCAAGCGAAACAACTGAAGATGGGGGTCACT
CCACACACACATTATCCCAATCAGGAGAAACAGAAGTAACAGAAGAAACAGAAGAAACAGAAGAAACAGT
AGGACACACAACAACGGTAACAATAACATTACCACCAAAAGAAGTAAAAGTTGTTGAAAATTCAATAGAA
CATAAGAGTAATGACAATTCACAAGCCTTGACAAAAACAGTTTATCTAAAGAAATTAGATGAATTTTTAA
CTAAATCATATATATGTCATAAATATATTTTAGTATCAAACTCTAGTATGGACCAAAAATTATTAGAGGT
ATATAATCTTACTCCAGAAGAAGAAAATGAATTAAAATCATGTGATCCATTAGATTTATTATTTAATATT
CAAAATAACATACCTGCTATGTATTCATTATATGATAGTATGAACAATGATTTACAACATCTCTTTTTTG
AATTATATCAAAAGGAAATGATTTATTATTTACATAAACTAAAAGAGGAAAATCACATCAAAAAATTATT
AGAGGAGCAAAAACAAATAACTGGAACATCATCTACATCCAGTCCTGGAAATACAACCGTAAATACTGCT
CAATCCGCAACTCACAGTAATTCCCAAAACCAACAATCAAATGCATCCTCTACCAATACCCAAAATGGTG
TAGCTGTATCATCTGGTCCTGCTGTAGTTGAAGAAAGTCATGATCCCTTAACAGTATTGTCTATTAGTAA
CGATTTGAAAGGTATTGTTAGTCTCTTAAATCTTGGAAATAAAACTAAAGTACCTAATCCATTAACCATT
TCTACAACAGAGATGGAAAAATTTTATGAGAATATTTTAAAAAATAATGATACCTATTTTAATGATGATA
TCAAACAATTCGTAAAATCTAATTCAAAAGTAATTACAGGTTTGACCGAAACACAAAAAAATGCATTAAA
TGATGAAATTAAAAAATTAAAAGATACTTTACAGTTATCATTTGATTTATATAATAAATATAAATTAAAA
TTAGATAGATTATTTAATAAGAAAAAAGAACTTGGCCAAGACAAAATGCAAATTAAAAAACTTACTTTAT
TAAAAGAACAATTAGAATCAAAATTGAATTCACTTAATAACCCACATAATGTATTACAAAACTTTTCTGT
TTTCTTTAACAAAAAAAAAGAAGCTGAAATAGCAGAAACTGAAAACACATTAGAAAACACAAAAATATTA
TTGAAACATTATAAAGGACTTGTTAAATATTATAATGGTGAATCATCTCCATTAAAAACTTTAAGTGAAG
TATCAATTCAAACAGAAGATAATTATGCCAATTTAGAAAAATTTAGAGTATTAAGTAAAATAGATGGAAA
ACTCAATGATAATTTACATTTAGGAAAGAAAAAATTATCTTTCTTATCAAGTGGATTACATCATTTAATT
ACTGAATTAAAAGAAGTAATAAAAAATAAAAATTATACAGGTAATTCTCCAAGTGAAAATAATAAGAAAG
TTAACGAAGCTTTAAAATCTTACGAAAATTTTCTCCCAGAAGCAAAAGTTACAACAGTTGTAACTCCACC
TCAACCAGATGTAACTCCATCTCCATTATCTGTAAGGGTAAGTGGTAGTTCAGGATCCACAAAAGAAGAA
ACACAAATACCAACTTCAGGCTCTTTATTAACAGAATTACAACAAGTAGTACAATCACAAAATTATGACG
AAGAAGATGATTCCTTAGTTGTATTACCCATTTTTGGAGAATCCGAAGATAATGACGAATATTTAGATCA
AGTAGTAACTGGAGAAGCAATATCTGTCACAATGGATAATATCCTCTCAGGATTTGAAAATGAATATGAT
GTTATATATTTAAAACCTTTAGCTGGAGTATATAGAAGCTTAAAAAAACAAATTGAAAAAAACATTTTTA
CATTTAATTTAAATTTGAACGATATCTTAAATTCACGTCTTAAGAAACGAAAATATTTCTTAGATGTATT
AGAATCTGATTTAATGCAATTTAAACATATATCCTCAAATGAATACATTATTGAAGATTCATTTAAATTA
TTGAATTCAGAACAAAAAAACACACTTTTAAAAAGTTACAAATATATAAAAGAATCAGTAGAAAATGATA
TTAAATTTGCACAGGAAGGTATAAGTTATTATGAAAAGGTTTTAGCGAAATATAAGGATGATTTAGAATC
AATTAAAAAAGTTATCAAAGAAGAAAAGGAGAAGTTCCCATCATCACCACCAACAACACCTCCGTCACCA
GCAAAAACAGACGAACAAAAGAAGGAAAGTAAGTTCCTTCCATTTTTAACAAACATTGAGACCTTATACA
ATAACTTAGTTAATAAAATTGACGATTACTTAATTAACTTAAAGGCAAAGATTAACGATTGTAATGTTGA
AAAAAATGAAGCACATGTTAAAATAACTAAACTTAGTGATTTAAAAGCAATTGATGACAAAATAGATCTT
TTTAAAAACCATAACGACTTCGAAGCAATTAAAAAATTGATAAATGATGATACGAAAAAAGATATGCTTG
GCAAATTACTTAGTACAGGATTAGTTCAAAATTTTCCTAATACAATAATATCAAAATTAATTGAAGGAAA
ATTCCAAGATATGTTAAACATTTCACAACACCAATGCGTAAAAAAACAATGTCCACAAAATTCTGGATGT
TTCAGACATTTAGATGAAAGAGAAGAATGTAAATGTTTATTAAATTACAAACAAGAAGGTGATAAATGTG
TTGAAAATCCAAATCCTACTTGTAACGAAAATAATGGTGGATGTGATGCAGATGCCAAATGTACCGAAGA
AGATTCAGGTAGCAACGGAAAGAAAATCACATGTGAATGTACTAAACCTGATTCTTATCCACTTTTCGAT
GGTATTTTCTGCAGTTCCTCTAACTTCTTAGGAATATCATTCTTATTAATACTCATGTTAATATTATACA
GTTTCATTTAATAA

>AB502470.1 Plasmodium falciparum msp1 gene for merozoite surface protein-1, complete cds, isolate: Tz98-098
ATGAAGATCATATTCTTTTTATGTTCATTTCTTTTTTTTATTATAAATACACAATGTGTAACACATGAAA
GTTATCAAGAACTTGTCAAAAAACTAGAAGCTTTAGAAGATGCAGTATTGACAGGTTATAGTTTATTTCA
AAAGGAAAAAATGGTATTAAATGAAGAAGAAATTACTACAAAAGGTGCAAGTGCTCAAAGTGGTGCAAGT
GCTCAAAGTGGTGCAAGTGCTCAAAGTGGTGCAAGTGCTCAAAGTGGTACAAGTGGTCCAAGTGGTCCAA
GTGGTACAAGTCCATCATCTCGTTCAAACACTTTACCTCGTTCAAATACTTCATCTGGTGCAAGCCCTCC
AGCTGATGCAAGCGATTCAGATGCTAAATCTTACGCTGATTTAAAACACAGAGTACGAAATTACTTGTTC
ACTATTAAAGAACTCAAATATCCCGAACTCTTTGATTTAACCAATCATATGTTAACTTTGTGTGATAATA
TTCATGGTTTCAAATATTTAATTGATGGATATGAAGAAATTAATGAATTATTATATAAATTAAACTTTTA
TTTTGATTTATTAAGAGCAAAATTAAATGATGTATGTGCTAATGATTATTGTCAAATACCTTTCAATCTT
AAAATTCGTGCAAATGAATTAGACGTACTTAAAAAACTTGTGTTCGGATATAGAAAACCATTAGACAATA
TTAAAGATAATGTAGGAAAAATGGAAGATTACATTAAAAAAAATAAAACAACCATAGCAAATATAAATGA
ATTAATTGAAGGAAGTAAGAAAACAATTGATCAAAATAAGAATGCAGATAATGAAGAAGGAAAAAAAAAA
TTATACCAAGCTCAATATGATCTTTTTATTTACAATAAACAATTACAAGAAGCACATAATTTAATAAGCG
TTTTAGAAAAACGTATTGACACTTTAAAAAAAAATGAAAACATAAAGAAATTACTTGAAGATATAGATAA
AATTAAAACAGATGCCGAAAAACTCACTACTGGAAGTAAACCAAATACTCTCCTTGATAAGAACAAAAAA
ATCGAGGAACACGAAGAAAAAATAAAAGAAATTGCCAAAACTATTAAATTTAACATTGATAGTTTATTTA
CTGATCCACTTGAATTAGAATATTATTTAAGAGAAAAAAATAAAAAAGTTGATGTAACACCTAAATCACA
AGATCCTACGAAATCTGTTCAAATACCAAAAGTTCCTTATCCAAATGGTATTGTATATCCTTTACCACTC
ACTGATATTCATAATTCATTAGCTGCAGATAATGATAAAAATTCATATGGTGATTTAATGAATCCTGATA
CTAAAGAAAAAATTAATGAAAAAATTATTACAGATAATAAGGAAAGAAAAATATTCATTAATAACATTAA
AAAACAAATTGATTTAGAAGAAAAAAACATTAATCACACAAAAGAACAAAATAAAAAATTACTTGAAGAT
TATGAAAAGTCAAAAAAGGATTATGAAGAATTACTTGAAAAATTTTATGAAATGAAATTTAATAATAATT
TTGACAAAGATGTCGTAGATAAAATATTCAGTGCAAGATATACATATAATGTTGAAAAACAAAGATATAA
TAATAAATTTTCATCCTCTAATAATTCTGTATATAATGTTCAAAAATTAAAAAAGGCTCTTTCATATCTT
GAAGATTATTCTTTAAGAAAAGGAATTTCTGAAAAAGATTTTAATCATTATTATACTTTGAAAACTGGCC
TCGAAGCTGATATAAAAAAATTAACAGAAGAAATAAAGAGTAGTGAAAACAAAATTCGAGAAAAAAATTT
TAAAGGACTAACACATTCAGCAAATGGTTCCTTAGAAGTATCTGATATTGTAAAATTACAAGTACAAAAA
GTTTTATTAATTAAAAAAATAGAAGACTTAAGAAAGATAGAATTATTTTTAAAAAATGCACAACTAAAAG
ATAGTATTCATGTACCAAATATTTATAAACCACAAAATAAACCAGAACCATATTATTTAATTGTATTAAA
AAAAGAAGTAGATAAATTAAAAGAATTTATACCAAAAGTAAAAGACATGTTAAAGAAAGAACAAGCTGTC
TTATCAAGTATTACACAACCTTTAGTTGCAGCAAGCGAAACAACTGAAGATGGGGGTCACTCCACACACA
CATTATCCCAATCAGGAGAAACAGAAGTAACAGAAGAAACAGAAGAAACAGAAGAAACAGTAGGACACAC
AACAACGGTAACAATAACATTACCACCAACACAACCATCACCACCAAAAGAAGTAAAAGTTGTTGAAAAT
TCAATAGAACATAAGAGTAATGACAATTCACAAGCCTTGACAAAAACAGTTTATCTAAAGAAATTAGATG
AATTTTTAACTAAATCATATATATGTCATAAATATATTTTAGTATCAAACTCTAGTATGGACCAAAAATT
ATTAGAGGTATATAATCTTACTCCAGAAGAAAAAAATGAATTAAAATCATGTGATCCATTAGATTTATTA
TTTAATATTCAAAATAACATACCTGCTATGTATTCATTATATGATAGTATGAACAATGATTTACAACATC
TCTTTTTTGAATTATATCAAAAGGAAATGATTTATTATTTACATAAACTAAAAGAGGAAAATCACATCAA
AAAATTATTAGAGGAGCAAAAACAAATAACTGGAACATCATCTACATCCAGTCCTGGAAATACAACCGTA
AATACTGCTCAATCCGCAACTCACAGTAATTCCCAAAACCAACAATCAAATGCATCCTCTACCAATACCC
AAAATGGTGTAGCTGTATCATCTGGTCCTGCTGTAGTTGAAGAAAGTCATGATCCCTTAGCAGTATTGTC
TATTAGTAACGATTTGAAAGGTATTGTTAGTCTCTTAAATCTTGGAAATAAAACTAAAGTACCTAATCCA
TTAACCATTTCTACAACAGAGATGGAAAAATTTTATGAGAATATTTTAAAAAATAATGATACCTATTTTA
ATGATGATATCAAACAATTCGTAAAATCTAATTCAAAAGTAATTACAGGTTTGACCGAAACACAAAAAAA
TGCATTAAATGATGAAATTAAAAAATTAAAAGATACTTTACAGTTATCATTTGATTTATATAATAAATAT
AAATTAAAATTAGATAGATTATTTAATAAGAAAAAAGAACTTGGCCAAGACAAAATGCAAATTAAAAAAC
TTACTTTATTAAAAGAACAATTAGAATCAAAATTGAATTCACTTAATAACCCACATAATGTATTACAAAA
CTTTTCTGTTTTCTTTAACAAAAAAAAAGAAGCTGAAATAGCAGAAACTGAAAACACATTAGAAAACACA
AAAATATTATTGAAACATTATAAAGGACTTGTTAAATATTATAATGGTGAATCATCTCCATTAAAAACTT
TAAGTGAAGTATCAATTCAAACAGAAGATAATTATGCCAATTTAGAAAAATTTAGAGTATTAAGTAAAAT
AGATGGAAAACTCAATGATAATTTACATTTAGGAAAGAAAAAATTATCTTTCTTATCAAGTGGATTACAT
CATTTAATTACTGAATTAAAAGAAGTAATAAAAAATAAAAATTATACAGGTAATTCTCCAAGTGAAAATA
ATAAGAAAGTTAACGAAGCTTTAAAATCTTACGAAAATTTTCTCCCAGAAGCAAAAGTTACAACAGTTGT
AACTCCACCTCAACCAGATGTAACTCCATCTCCATTATCTGTAAGGGTAAGTGGTAGTTCAGGATCCACA
AAAGAAGAAACACAAATACCAACTTCAGGCTCTTTATTAACAGAATTACAACAAGTAGTACAATTACAAA
ATTATGACGAAGAAGATGATTCCTTAGTTGTATTACCCATTTTTGGAGAATCCGAAGATAATGACGAATA
TTTAGATCAAGTAGTAACTGGAGAAGCAATATCTGTCACAATGGATAATATCCTCTCAGGATTTGAAAAT
GAATATGATGTTATATATTTAAAACCTTTAGCTGGAGTATATAGAAGCTTAAAAAAACAAATTGAAAAAA
ACATTTTTACATTTAATTTAAATTTGAACGATATCTTAAATTCACGTCTTAAGAAACGAAAATATTTCTT
AGATGTATTAGAATCTGATTTAATGCAATTTAAACATATATCCTCAAATGAATACATTATTGAAGATTCA
TTTAAATTATTGAATTCAGAACAAAAAAACACACTTTTAAAAAGTTACAAATATATAAAAGAATCAGTAG
AAAATGATATTAAATTTGCACAGGAAGGTATAAGTTATTATGAAAAGGTTTTAGCGAAATATAAGGATGA
TTTAGAATCAATTAAAAAAGTTATCAAAGAAGAAAAGGAGAAGTTCCCATCATCACCACCAACAACACCT
CCGTCACCAGCAAAAACAGACGAACAAAAGAAGGAAAGTAAGTTCCTTCCATTTTTAACAAACATTGAGA
CCTTATACAATAACTTAGTTAATAAAATTGACGATTACTTAATTAACTTAAAGGCAAAGATTAACGATTG
TAATGTTGAAAAAGATGAAGCACATGTTAAAATAACTAAACTTAGTGATTTAAAAGCAATTGATGACAAA
ATAGATCTTTTTAAAAACCCTTACGACTTCGAAGCAATTAAAAAATTGATAAATGATGATACGAAAAAAG
ATATGCTTGGCAAATTACTTAGTACAGGATTAGTTCAAAATTTTCCTAATACAATAATATCAAAATTAAT
TGAAGGAAAATTCCAAGATATGTTAAACATTTCACAACACCAATGCGTAAAAAAACAATGTCCAGAAAAT
TCTGGATGTTTCAGACATTTAGATGAAAGAGAAGAATGTAAATGTTTATTAAATTACAAACAAGAAGGTG
ATAAATGTGTTGAAAATCCAAATCCTACTTGTAACGAAAATAATGGTGGATGTGATGCAGATGCCAAATG
TACCGAAGAAGATTCAGGTAGCAACGGAAAGAAAATCACATGTGAATGTACTAAACCTGATTCTTATCCA
CTTTTCGATGGTATTTTCTGCAGTTCCTCTAACTTCTTAGGAATATCATTCTTATTAATACTCATGTTAA
TATTATACAGTTTCATTTAA

>AB502471.1 Plasmodium falciparum msp1 gene for merozoite surface protein-1, complete cds, isolate: Tz98-100
ATGAAGATCATATTCTTTTTATGTTCATTTCTGTTTTTTATTATAAATACACAATGTGTAACACATGAAA
GTTATCAAGAACTTGTCAAAAAACTAGAAGCTTTAGAAGATGCAGTATTGACAGGTTATGGTTTATTTCA
TAAGGAAAAAATGATCTTAAATGAAGGAACAAGTGGAACAGCTGTTACAACTAGTACACCTGGTTCAGGT
GGTTCAGTTACTTCAGGTGGTTCAGGTGGTTCAGTTGCTTCAGGTGGTTCAGGTGGCTCAGTTGCTTCAG
GTGGCTCAGTTGCTTCAGGTGGCTCAGTTGCTTCAGGTGGCTCAGTTGCTTCAGGTGGTTCAGGTAATTC
AAGACGTACAAATCCTTCAGATAATTCAAGTGATTCAGATGCTAAATCTTACGCTGATTTAAAACATAGA
GTTCAAAATTACTTGTTCACTATTAAAGAACTCAAATATCCCGAACTCTTTGATTTAACCAATCATATGT
TAACTTTGTGTGATAATATTCATGGTTTCAAATATTTAATTGATGGATATGAAGAAATTAATGAATTATT
ATATAAATTAAACTTTTATTTTGATTTATTAAGAGCAAAATTAAATGATGTATGTGCTAATGATTATTGT
CAAATACCTTTCAATCTTAAAATTCGTGCAAATGAATTAGACGTACTTAAAAAACTTGTGTTCGGATATA
GAAAACCATTAGACAATATTAAAGATAATGTAGGAAAAATGGAAGATTACATTAAAAAAAATAAAACAAC
CATAGCAAATATAAATGAATTAATTGAAGGAAGTAAGAAAACAATTGATCAAAATAAGAATGCAGATAAT
GAAGAAGGAAAAAAAAAATTATACCAAGCTCAATATGATCTTTCTATTTACAATAAACAATTAGAAGAAG
CACATAATTTAATAAGCGTTTTAGAAAAACGTATTGACACTTTAAAAAAAAATGAAAACATAAAGAAATT
ACTTGAAGATATAGATAAAATTAAAACAGATGCCGAAAAACTCACTACTGGAAGTAAACCAAATACTCTC
CTTGATAAGAACAAAAAAATCGAGGAACACGAAGAAAAAATAAAAGAAATTGCCAAAACTATTAAATTTA
ACATTGATAGTTTATTTACTGATCCACTTGAATTAGAATATTATTTAAGAGAAAAAAATAAAAAAGTTGA
TGTAACACCTAAATCACAAGATCCTACGAAATCTGTTCAAATACCAAAAGTTCCTTATCCAAATGGTATT
GTATATCCTTTACCACTCACTGATATTCATAATTCATTAGCTGCAGATAATGATAAAAATTCATATGGTG
ATTTAATGAATCCTGATACTAAAGAAAAAATTAATGAAAAAATTATTACAGATAATAAGGAAAGAAAAAT
ATTCATTAATAACATTAAAAAACAAATTGATTTAGAAGAAAAAAACATTAATCACACAAAAGAACAAAAT
AAAAAATTACTTGAAGATTATGAAAAGTCAAAAAAGGATTATGAAGAATTACTTGAAAAATTTTATGAAA
TGAAATTTAATAATAATTTTAACAAAGATGTCGTAGATAAAATGTTCAGTGCAAGATATACATATAATGT
TGAAAAACAAAGATATAATAATAAATTTTCATCCTCTAATAATTCTGTATATAATGTTCAAAAATTAAAA
AAGGCTCTTTCATATCTTGAAGATTATTCTTTAAGAAAAGGAATTTCTGAAAAAGATTTTAATCATTATT
ATACTTTGAAAACTGGCCTCGAAGCTGATATAAAAAAATTAACAGAAGAAATAAAGAGTAGTGAAAACAA
AATTCGAGAAAAAAATTTTAAAGGACTAACACATTCAGCAAATGCTTCCTTAGAAGTATATGATATTGTA
AAATTACAAGTACAAAAAGTTTTATTAATTAAAAAAATAGAAGACTTAAGAAAGATAGAATTATTTTTAA
AAAATGCACAACTAAAAGATAGTATTCATGTACCAAATATTTATAAACCACAAAATAAACCAGAACCATA
TTATTTAATTGTATTAAAAAAAGAAGTAGATAAATTAAAAGAATTTATACCAAAAGTAAAAGACATGTTA
AAGAAAGAACAAGCTGTCTTATCAAGTATTACACAACCTTTAGTTGCAGCAAGCGAAACAACTGAAGATG
GGGGTCACTCCACACACACATTATCCCAATCAGGAGAAACAGAAGTAACAGAAGAAACAGAAGAAACAGA
AGAAACAGTAGGACACACAACAACGGTAACAATAACATTACCACCAACACAACCATCACCACCAAAAGAA
GTAAAAGTTGTTGAAAATTCAATAGAACATAAGAGTAATGACAATTCACAAGCCTTGACAAAAACAGTTT
ATCTAAAGAAATTAGATGAATTTTTAACTAAATCATATATATGTCATAAATATATTTTAGTATCAAACTC
TAGTATGGACCAAAAATTATTAGAGGTATATAATCTTACTCCAGAAGAAAAAAATGAATTAAAATCATGT
GATCCATTAGATTTATTATTTAATATTCAAAATAACATACCTGCTATGTATTCATTATATGATAGTATGA
ACAATGATTTACAACATCTCTTTTTTGAATTATATCAAAAGGAAATGATTTATTATTTACATAAACTAAA
AGAGGAAAATCACATCAAAAAATTATTAGAGGAGCAAAAACAAATAACTGGAACATCATCTACATCCAGT
CCTGGAAATACAACCGTAAATACTGCTCAATCCGCAACTCACAGTAATTCCCAAAACCAACAATCAAATG
CATCCTCTACCAATACCCAAAATGGTGTAGCTGTATCATCTGGTCCTGCTGTAGTTGAAGAAAGTCATGA
TCCCTTAACAGTATTGTCTATTAGTAACGATTTGAAAGGTATTGTTAGTCTCTTAAATCTTGGAAATAAA
ACTAAAGTACCTAATCCATTAACCATTTCTACAACAGAGATGGAAAAATTTTATGAGAATATTTTAAAAA
ATAATGATACCTATTTTAATGATGATATCAAACAATTCGTAAAATCTAATTCAAAAGTAATTACAGGTTT
GACCGAAACACAAAAAAATGCATTAAATGATGAAATTAAAAAATTAAAAGATACTTTACAGTTATCATTT
GATTTATATAATAAATATAAATTAAAATTAGATAGATTATTTAATAAGAAAAAAGAACTTGGCCAAGACA
AAATGCAAATTAAAAAACTTACTTTATTAAAAGAACAATTAGAATCAAAATTGAATTCACTTAATAACCC
ACATAATGTATTACAAAACTTTTCTGTTTTCTTTAACAAAAAAAAAGAAGCTGAAATAGCAGAAACTGAA
AACACATTAGAAAACACAAAAATATTATTGAAACATTATAAAGGACTTGTTAAATATTATAATGGTGAAT
CATCTCCATTAAAAACTTTAAGTGAAGTATCAATTCAAACAGAAGATAATTATGCCAATTTAGAAAAATT
TAGAGTATTAAGTAAAATAGATGGAAAACTCAATGATAATTTACATTTAGGAAAGAAAAAATTATCTTTC
TTATCAAGTGGATTACATCATTTAATTACTGAATTAAAAGAAGTAATAAAAAATAAAAATTATACAGGTA
ATTCTCCAAGTGAAAATAATAAGAAAGTTAACGAAGCTTTAAAATCTTACGAAAATTTTCTCCCAGAAGC
AAAAGTTACAACAGTTGTAACTCCACCTCAACCAGATGTAACTCCATCTCCATTATCTGTAAGGGTAAGT
GGTAGTTCAGGATCCACAAAAGAAGAAACACAAATACCAACTTCAGGCTCTTTATTAACAGAATTACAAC
AAGTAGTACAATTACAAAATTATGACGAAGAAGATGATTCCTTAGTTGTATTACCCATTTTTGGAGAATC
CGAAGATAATGACGAATATTTAGATCAAGTAGTAACTGGAGAAGCAATATCTGTCACAATGGATAATATC
CTCTCAGGATTTGAAAATGAATATGATGTTATATATTTAAAACCTTTAGCTGGAGTATATAGAAGCTTAA
AAAAACAAATTGAAAAAAACATTTTTACATTTAATTTAAATTTGAACGATATCTTAAATTCACGTCTTAA
GAAACGAAAATATTTCTTAGATGTATTAGAATCTGATTTAATGCAATTTAAACATATATCCTCAAATGAA
TACATTATTGAAGATTCATTTAAATTATTGAATTCAGAACAAAAAAACACACTTTTAAAAAGTTACAAAT
ATATAAAAGAATCAGTAGAAAATGATATTAAATTTGCACAGGAAGGTATAAGTTATTATGAAAAGGTTTT
AGCGAAATATAAGGATGATTTAGAATCAATTAAAAAAGTTATCAAAGAAGAAAAGGAGTTCCCATCATCA
CCACCAACAACACCTCCGTCACCAGCAAAAACAGACGAACAAAAGAAGGAAAGTAAGTTCCTTCCATTTT
TAACAAACATTGAGACCTTATACAATAACTTAGTTAATAAAATTGACCATTACTTAATTAACTTAAAGGC
AAAGATTAACGATTGTAATGTTGAAAAAGATGAAGCACATGTTAAAATAACTAAACTTAGTGATTTAAAA
GCAATTGATGACAAAATAGATCTTTTTAAAAACCATAACGACTTCGAAGCAATTAAAAAATTGATAAATG
ATGATACGAAAAAAGATATGCTTGGCAAATTACTTAGTACAGGATTAGTTCAAAATTTTCCTAATACAAT
AATATCAAAATTAATTGAAGGAAAATTCCAAGATATGTTAAACATTTCACAACACCAATGCGTAAAAAAA
CAATGTCCAGAAAATTCTGGATGTTTCAGACATTTAGATGAAAGAGAAGAATGTAAATGTTTATTAAATT
ACAAACAAGAAGGTGATAAATGTGTTGAAAATCCAAATCCTACTTGTAACGAAAATAATGGTGGATGTGA
TGCAGATGCCAAATGTACCGAAGAAGATTCAGGTAGCAACGGAAAGAAAATCACATGTGAATGTACTAAA
CCTGATTCTTATCCACTTTTCGATGGTATTTTCTGCAGTTCCTCTAACTTCTTAGGAATATCATTCTTAT
TAATACTCATGTTAATATTATACAGTTTCATTTAA

>AB502472.1 Plasmodium falciparum msp1 gene for merozoite surface protein-1, complete cds, isolate: Tz98-101
ATGAAGATCATATTCTTTTTATGTTCATTTCTTTTTTTTATTATAAATACACAATGTGTAACACATGAAA
GTTATCAAGAACTTGTCAAAAAACTAGAAGCTTTAGAAGATGCAGTATTGACAGGTTATAGTTTATTTCA
AAAGGAAAAAATGGTATTAAATGAAGGAACAAGTGGAACAGCTGTTACAACTAGTACACCTGGTTCAAAG
GGTTCAGGTGGCTCAGTTGCTTCAGGTGGTTCAGGTGGTTCAGTTGCTTCAGGTGGTTCAGGTGGCTCAG
TTGCTTCAGGTGGCTCAGTTGCTTCAGGTGGCTCAGTTGCTTCAGGTGGCTCAGTTGCTTCAGGTGGTTC
AGGTAATTCAAGACGTACAAATCCTTCAGATAATTCAAGTGATTCAGATGCTAAATCTTACGCTGATTTA
AAACATAGAGTTCAAAATTACTTGTTCACTATTAAAGAACTCAAATATCCCGAACTCTTTGATTTAACCA
ATCATATGTTAACTTTGTGTGATAATATTCATGGTTTCAAATATTTAATTGATGGATATGAAGAAATTAA
TGAATTATTATATAAATTAAACTTTTATTATGATTTATTAAGAGCCAAATTAAATGATGCATGTGCCAAT
AGTTATTGTCAAATACCTTTCAATCTTAAAATTCGTGCAAATGAATTAGACGTACTTAAAAAAATTGTGT
TCGGATATAGAAAACCATTAGACAATATTAAAGATAATGTAGGAAAAATGGAAGATTACATTAAAAAAAA
TAAAACAACCATAGCAAATATAAATGAATTAATTGAAGGAAGTAAGAAAACAATTGATCAAAATAAGAAT
GCAGATAATGAAGAAGGAAAAAAAAAATTATACCAAGCTCAATATGATCTTTTTATTTACAATAAACAAT
TACAAGAAGCACATAATTTAATAAGCGTTTTAGAAAAACGTATTGACACTTTAAAAAAAAATGAAAACAT
AAAGAAATTACTTGAAGATATAGATAAAATTAAAACAGATGCCGAAAAACCCACTACTGGAAGTAAACCA
AATACTCTCCTTGATAAGAACAAAAAAATCGAGGAACACGAAGAAAAAATAAAAGAAATTGCCAAAACTA
TTAAATTTAACATTGATAGTTTATTTACTGATCCACTTGAATTAGAATATTATTTAAGAGAAAAAAATAA
AAAAGTTGATGTAACACCTAAATCACAAGATCCTACGAAATCTGTTCAAATACCAAAAGTTCCTTATCCA
AATGGTATTGTATATCCTTTACCACTCACTGATATTCATAATTCATTAGCTGCAGATAATGATAAAAATT
CATATGGTGATTTAATGAATCCTGATACTAAAGAAAAAATTAATGAAAAAATTATTACAGATAATAAGGA
AAGAAAAATATTCATTAATAACATTAAAAAACAAATTGATTTAGAAGAAAAAAACATTAATCACACAAAA
GAACAAAATAAAAAATTACTTGAAGATTATGAAAAGTCAAAAAAGGATTATGAAGAATTACTTGAAAAAT
TTTATGAAATGAAATTTAATAATAATTTTAACAAAGATGTCGTAGATAAAATGTTCAGTGCAAGATATAC
ATATAATGTTGAAAAACAAAGATATAATAATAAATTTTCATCCTCTAATAATTCTGTATATAATGTTCAA
AAATTAAAAAAGGCTCTTTCATATCTTGAAGATTATTCTTTAAGAAAAGGAATTTCTGAAAAAGATTTTA
ATCATTATTATACTTTGAAAACTGGCCTCGAAGCTGATATAAAAAAATTAACAGAAGAAATAAAGAGTAG
TGAAAACAAAATTCTAGAAAAAAATTTTAAAGGACTAACACATTCAGCAAATGCTTCCTTAGAAGTATCT
GATATTGTAAAATTACAAGTACAAAAAGTTTTATTAATTAAAAAAATAGAAGACTTAAGAAAGATAGAAT
TATTTTTAAAAAATGCACAACTAAAAGATAGTATTCATGTACCAAATATTTATAAACCACAAAATAAACC
AGAACCATATTATTTAATTGTATTAAAAAAAGAAGTAGATAAATTAAAAGAATTTATACCAAAAGTAAAA
GACATGTTAAAGAAAGAACAAGCTGTCTTATCAAGTGTTACACAACCTTTAGTTGCAGCAAGCGAAACAA
CTGAAGATGGGGGTCACTCCACACACACATTATCCCAATCAGGAGAAACAGAAGTAACAGAAGAAACAGA
AGAAACAGAAGAAACAGTAGGACACACAACAACGGTAACAATAACATTACCACCAACACAACCATCACCA
CCAAAAGAAGTAAAAGTTGTTGAAAATTCAATAGAACATAAGAGTAATGACAATTCACAAGCCTTGACAA
AAACAGTTTATCTAAAGAAATTAGATGAATTTTTAACTAAATCATATATATGTCATAAATATATTTTAGT
ATCAAACTCTAGTATGGACCAAAAATTATTAGAGGTATATAATCTTACTCCAGAAGAAAAAAATGAATTA
AAATCATGTGATCCATTAGATTTATTATTTAATATTCAAAATAACATACCTGCTATGTATTCATTATATG
ATGGTATGAACAATGATTTACAACATCTCTTTTTTGAATTATATCAAAAGGAAATGATTTATTATTTACA
TAAACTAAAAGAGGAAAATCACATCAAAAAATTATTAGAGGAGCAAAAACAAATAACTGGAACATCATCT
ACATCCAGTCCTGGAAATACAACCGTAAATACTGCTCAATCCGCAACTCACAGTAATTCCCAAAACCAAC
AATCAAATGCATCCTCTACCAATACCCAAAATGGTGTAGCTGTATCATCTGGTCCTGCTGTAGTTGAAGA
AAGTCATGATCCCTTAACAGTATTGTCTATTAGTAACGATTTGAAAGGTATTGTTAGTCTCTTAAATCTT
GGAAATAAAACTAAAGTACCTAATCCATTAACCATTTCTACAACAGAGATGGAAAAATTTTATGAGAATA
TTTTAAAAAATAATGATACCTATTTTAATGATGATATCAAACAATTCGTAAAATCTAATTCAAAAGTAAT
TACAGGTTTGACCGAAACACAAAAAAATGCATTAAATGATGAAATTAAAAAATTAAAAGATACTTTACAG
TTATCATTTGATTTATATAATAAATATAAATTAAAATTAGATAGATTATTTAATAAGAAAAAAGAACTTG
GCCAAGACAAAATGCAAATTAAAAAACTTACTTTATTAAAAGAACAATTAGAATCAAAATTGAATTCACT
TAATAACCCACATAATGTATTACAAAACTTTTCTGTTTTCTTTAACAAAAAAAAAGAAGCTGAAATAGCA
GAAACTGAAAACACATTAGAAAACACAAAAATATTATTGAAACATTATAAAGGACTTGTTAAATATTATA
ATGGTGAATCATCTCCATTAAAAACTTTAAGTGAAGTATCAATTCAAACAGAAGATAATTATGCCAATTT
AGAAAAATTTAGAGTATTAAGTAAAATAGATGGAAAACTCAATGATAATTTACATTTAGGAAAGAAAAAA
TTATCTTTCTTATCAAGTGGATTACATCATTTAATTACTGAATTAAAAGAAGTAATAAAAAATAAAAATT
ATACAGGTAATTCTCCAAGTGAAAATAATAAGAAAGTTAACGAAGCTTTAAAATCTTACGAAAATTTTCT
CCCAGAAGCAAAAGTTACAACAGTTGTAACTCCACCTCAACCAGATGTAACTCCATCTCCATTATCTGTA
AGGGTAAGTGGTAGTTCAGGATCCACAAAAGAAGAAACACAAATACCAACTTCAGGCTCTTTATTAACAG
AATTACAACAAGTAGTACAATCACAAAATTATGACGAAGAAGATGATTCCTTAGTTGTATTACCCATTTT
TGGAGAATCCGAAGATAATGACGAATATTTAGATCAAGTAGTAACTGGAGAAGCAATATCTGTCACAATG
GATAATATCCTCTCAGGATTTGAAAATGAATATGATGTTATATATTTAAAACCTTTAGCTGGAGTATATA
GAAGCTTAAAAAAACAAATTGAAAAAAACATTTTTACATTTAATTTAAATTTGAACGATATCTTAAATTC
ACGTCTTAAGAAACGAAAATATTTCTTAGATGTATTAGAATCTGATTTAATGCAATTTAAACATATATCC
TCAAATGAATACATTATTGAAGATTCATTTAAATTATTGAATTCAGAACAAAAAAACACACTTTTAAAAA
GTTACAAATATATAAAAGAATCAGTAGAAAATGATATTAAATTTGCACAGGAAGGTATAAGTTATTATGA
AAAGGTTTTAGCGAAATATAAGGATGATTTAGAATCAATTAAAAAAGTTATCAAAGAAGAAAAGGAGAAG
TTCCCATCATCACCACCAACAACACCTCCGTCACCAGCAAAAACAGACGAACAAAAGAAGGAAAGTAAGT
ACCTTCCATTTTTAACAAACATTGAGACCTTATACAATAACTTAGTTAATAAAATTGACGATTACTTAAT
TAACTTAAAGGCAAAGATTAACGATTGTAATGTTGAAAAAAATGAAGCACATGTTAAAATAACTAAACTT
AGTGATTTAAAAGCAATTGATGACAAAATAGATCTTTTTAAAAACCATAACGACTTCGAAGCAATTAAAA
AATTGATAAATGATGATACGAAAAGAGATATGCTTGGCAAATTACTTAGTACAGGATTAGTTCAAAATTT
TCCTAATACAATAATATCAAAATTAATTGAAGGAAAATTCCAAGATATGTTAAACATTTCACAACACCAA
TGCGTAAAAAAACAATGTCCACAAAATTCTGGATGTTTCAGACATTTAGATGAAAGAGAAGAATGTAAAT
GTTTATTAAATTACAAACAAGAAGGTGATAAATGTGTTGAAAATCCAAATCCTACTTGTAACGAAAATAA
TGGTGGATGTGATGCAGATGCCAAATGTACCGAAGAAGATTCAGGTAGCAACGGAAAGAAAATCACATGT
GAATGTACTAAACCTGATTCTTATCCATTTTTCGATGGTATTTTCTGCAGTTCCTCTAACTTCTTAGGAA
TATCATTCTTATTAATACTCATGTTAATATTATACAGTTTCATTTAA

>AB502473.1 Plasmodium falciparum msp1 gene for merozoite surface protein-1, complete cds, isolate: Tz98-103
ATGAAGATCATATTCTTTTTATGTTCATTTCTTTTTTTTATTATAAATACACAATGTGTAACACATGAAA
GTTATCAAGAACTTGTCAAAAAACTAGAAGCTTTAGAAGATGCAGTATTGACAGGTTATAGTTTATTTCA
AAAGGAAAAAATGGTATTAAATGAAGGAACAAGTGGAACAGCTGTTACAACTAGTACACCTGGTTCAAAG
GGTTCAGTTACTTCAGGTGGTTCAGGTGGTTCAGTTGCTTCAGGTGGTTCAGGTGGCTCAGTTGCTTCAG
GTGGTTCAGGTGGCTCAGTTGCTTCAGGTGGCTCAGTTGCTTCAGGTGGTTCAGGTGGCTCAGTTGCTTC
AGGTGGCTCAGTTGCTTCAGGTGGTTCAGGTAATTCAAGACGTACAAATCCTTCAGATAATTCAAGTGAT
TCAGATGCTAAATCTTACGCTGATTTAAAACATAGAGTTCAAAATTACTTGTTCACTATTAAAGAACTCA
AATATCCCGAACTCTTTGATTTAACCAATCATATGTTAACTTTGAGTGATAATATTCATGGTTTCAAATA
TTTAATTGATGGATATGAAGAAATTAATGAATTATTATATAAATTAAACTTTTATTTTGATTTATTAAGA
GCAAAATTAAATGATGTATGTGCTAATGATTATTGTCAAATACCTTTCAATCTTAAAATTCGTGCAAATG
AATTAGACGTACTTAAAAAACTTGTGTTCGGATATAGAAAACCATTAGACAATATTAAAGATAATGTAGG
AAAAATGGAAGATTACATTAAAAAAAATAAAACAACCATAGCAAATATAAATGAATTAATTGAAGGAAGT
AAGAAAACAATTGATCAAAATAAGAATGCAGATAATGAAGAAGGAAAAAAAAAATTATACCAAGCTCAAT
ATGATCTTTCTATTTACAATAAACAATTAGAAGAAGCACATAATTTAATAAGCGTTTTAGAAAAACGTAT
TGACACTTTAAAAAAAAATGAAAACATAAAGAAATTACTTGATAAGATAAATGAAATTAAAAATCCCCCA
CCGGCCAATTCTGGAAATACACCAAATACTCTCCTTGATAAGAACAAAAAAATCGAGGAACACGAAGAAA
AAATAAAAGAAATTGCCAAAACTATTAAATTTAACATTGATAGTTTATTTACTGATCCACTTGAATTAGA
ATATTATTTAAGAGAAAAAAATAAAAAAGTTGATGTAACACCTAAATCACAAGATCCTACGAAATCTGTT
CAAATACCAAAAGTTCCTTATCCAAATGGTATTGTATATCCTTTACCACTCACTGATATTCATAATTCAT
TAGCTGCAGATAATGATAAAAATTCATATGGTGATTTAATGAATCCTGATACTAAAGAAAAAATTAATGA
AAAAATTATTACAGATAATAAGGAAAGAAAAATATTCATTAATAACATTAAAAAACAAATTGATTTAGAA
GAAAACAACATTAATCACACAAAAGAACAAAATAAAAAATTACTTGAAGATTATGAAAAGTCAAAAAAGG
ATTATGAAGAATTACTTGAAAAATTTTATGAAATGAAATTTAATAATAATTTTGACAAAGATGTCGTAGA
TAAAATATTCAGTGCAAGATATACATATAATGTTGAAAAACAAAGATATAATAATAAATTTTCATCCTCT
AATAATTCTGTATATAATGTTCAAAAATTAAAAAAGGCTCTTTCATATCTTGAAGATTATTCTTTAAGAA
AAGGAATTTCTGAAAAAGATTTTAATCATTATTATACTTTGAAAACTGGCCTCGAAGCTGATATAAAAAA
ATTAACAGAAGAAATAAAGAGTAGTGAAAACAAAATTCTAGAAAAAAATTTTAAAGGACTAACACATTCA
GCAAATGCTTCCTTAGAAGTATATGATATTGTAAAATTACAAGTACAAAAAGTTTTATTAATTAAAAAAA
TAGAAGACTTAAGAAAGATAGAATTATTTTTAAAAAATGCACAACTAAAAGATAGTATTCATGTACCAAA
TATTTATAAACCACAAAATAAACCAGAACCATATTATTTAATTGTATTAAAAAAAGAAGTAGATAAATTA
AAAGAATTTATACCAAAAGTAAAAGACATGTTAAAGAAAGAACAAGCTGTCTTATCAAGTATTACACAAC
CTTTAGTTGCAGCAAGCGAAACAACTGAAGATGGGGGTCACTCCACACACACATTATCCCAATCAGGAGA
AACAGAAGTAACAGAAGAAACAGAAGAAACAGTAGGACACACAACAACGGTAACAATAACATTACCACCA
ACACAACCATCACCACCAAAAGAAGTAAAAGTTGTTGAAAATTCAATAGAACATAAGAGTAATGACAATT
CACAAGCCTTGACAAAAACAGTTTATCTAAAGAAATTAGATGAATTTTTAACTAAATCATATATATGTCA
TAAATATATTTTAGTATCAAACTCTAGTATGGACCAAAAATTATTAGAGGTATATAATCTTACTCCAGAA
GAAAAAAATGAATTAAAATCATGTGATCCATTAGATTTATTATTTAATATTCAAAATAACATACCTGCTA
TGTATTCATTATATGATAGTATGAACAATGATTTACAACATCTCTTTTTTGAATTATATCAAAAGGAAAT
GATTTATTATTTACATAAACTAAAAGAGGAAAATCACATCAAAAAATTATTAGAGGAGCAAAAACAAATA
ACTGGAACATCATCTACATCCAGTCCTGGAAATACAACCGTAAATACTGCTCAATCCGCAACTCACAGTA
ATTCCCAAAACCAACAATCAAATGCATCCTCTACCAATACCCAAAATGGTGTAGCTGTATCATCTGGTCC
TGCTGTAGTTGAAGAAAGTCATGATCCCTTAACAGTATTGTCTATTAGTAACGATTTGAAAGGTATTGTT
AGTCTCTTAAATCTTGGAAATAAAACTAAAGTACCTAATCCATTAACCATTTCTACAACAGAGATGGAAA
AATTTTATGAGAATATTTTAAAAAATAATGATACCTATTTTAATGATGATATCAAACAATTCGTAAAATC
TAATTCAAAAGTAATTACAGGTTTGACCGAAACACAAAAAAATGCATTAAATGATGAAATTAAAAAATTA
AAAGATACTTTACAGTTATCATTTGATTTATATAATAAATATAAATTAAAATTAGATAGATTATTTAATA
AGAAAAAAGAACTTGGCCAAGACAAAATGCAAATTAAAAAACTTACTTTATTAAAAGAACAATTAGAATC
AAAATTGAATTCACTTAATAACCCACATAATGTATTACAAAACTTTTCTGTTTTCTTTAACAAAAAAAAA
GAAGCTGAAATAGCAGAAACTGAAAACACATTAGAAAACACAAAAATATTATTGAAACATTATAAAGGAC
TTGTTAAATATTATAATGGTGAATCATCTCCATTAAAAACTTTAAGTGAAGTATCAATTCAAACAGAAGA
TAATTATGCCAATTTAGAAAAATTTAGAGTATTAAGTAAAATAGATGGAAAACTCAATGATAATTTACAT
TTAGGAAAGAAAAAATTATCTTTCTTATCAAGTGGATTACATCATTTAATTACTGAATTAAAAGAAGTAA
TAAAAAATAAAAATTATACAGGTAATTCTCCAAGTGAAAATAATAAGAAAGTTAACGAAGCTTTAAAATC
TTACGAAAATTTTCTCCCAGAAGCAAAAGTTACAACAGTTGTAACTCCACCTCAACCAGATGTAACTCCA
TCTCCATTATCTGTAAGGGTAAGTGGTAGTTCAGGATCCACAAAAGAAGAAACACAAATACCAACTTCAG
GCTCTTTATTAACAGAATTACAACAAGTAGTACAATTACAAAATTATGACGAAGAAGATGATTCCTTAGT
TGTATTACCCATTTTTGGAGAATCCGAAGATAATGACGAATATTTAGATCAAGTAGTAACTGGAGAAGCA
ATATCTGTCACAATGGATAATATCCTCTCAGGATTTGAAAATGAATATGATGTTATATATTTAAAACCTT
TAGCTGGAGTATATAGAAGCTTAAAAAAACAAATTGAAAAAAACATTTTTACATTTAATTTAAATTTGAA
CGATATCTTAAATTCACGTCTTAAGAAACGAAAATATTTCTTAGATGTATTAGAATCTGATTTAATGCAA
TTTAAACATATATCCTCAAATGAATACATTATTGAAGATTCATTTAAATTATTGAATTCAGAACAAAAAA
ACACACTTTTAAAAAGTTACAAATATATAAAAGAATCAGTAGAAAATGATATTAAATTTGCACAGGAAGG
TATAAGTTATTATGAAAAGGTTTTAGCGAAATATAAGGATGATTTAGAATCAATTAAAAAAGTTATCAAA
GAAGAAAAGGAGAAGTTCCCATCATCACCACCAACAACACCTCCGTCACCAGCAAAAACAGACGAACAAA
AGAAGGAAAGTAAGTTCCTTCCATTTTTAACAAACATTGAGACCTTATACAATAACTTAGTTAATAAAAT
TGACGATTACTTAATTAACTTAAAGGCAAAGATTAACGATTGTAATGTTGAAAAAGATGAAGCACATGTT
AAAATAACTAAACTTAGTGATTTAAAAGCAATTGATGACAAAATAGATCTTTTTAAAAACCATAACGACT
TCGAAGCAATTAAAAAATTGATAAATGATGATACGAAAAAAGATATGCTTGGCAAATTACTTAGTACAGG
ATTAGTTCAAAATTTTCCTAATACAATAATATCAAAATTAATTGAAGGAAAATTCCAAGATATGTTAAAC
ATTTCACAACACCAATGCGTAAAAAAACAATGTCCAGAAAATTCTGGATGTTTCAGACATTTAGATGAAA
GAGAAGAATGTAAATGTTTATTAAATTACAAACAAGAAGGTGATAAATGTGTTGAAAATCCAAATCCTAC
TTGTAACGAAAATAATGGTGGATGTGATGCAGATGCCAAATGTACCGAAGAAGATTCAGGTAGCAACGGA
AAGAAAATCACATGTGAATGTACTAAACCTGATTCTTATCCACTTTTCGATGGTATTTTCTGCAGTTCCT
CTAACTTCTTAGGAATATCATTCTTATTAATACTCATGTTAATATTATACAGTTTCATTTAA

>AB502474.1 Plasmodium falciparum msp1 gene for merozoite surface protein-1, complete cds, isolate: Tz98-107
ATGAAGATCATATTCTTTTTATGTTCATTTCTTTTTTTTATTATAAATACACAATGTGTAACACATGAAA
GTTATCAAGAACTTGTCAAAAAACTAGAAGCTTTAGAAGATGCAGTATTGACAGGTTATGGTTTATTTCA
TAAGGAAAAAATGATCTTAAATGAAGAAGAAATTACTACAAAAGGTGCAAGTGCTCAAAGTGGTACAAGT
GGTACAAGTGGTACAAGTGGTACAAGTGGTACAAGTGGTACAAGTGCTCAAAGTGGTACAAGTGGTACAA
GTGGTACAAGTGGTACAAGTGGTACAAGTGGTCCAAGTGGTACAAGTCCATCATCTCGTTCAAACACTTT
ACCTCGTTCAAATACTTCATCTGGTGCAAGCCCTCCAGCTGATGCAAGCGATTCAGATGCTAAATCTTAC
GCTGATTTAAAACACAGAGTACGAAATTACTTGTTCACTATTAAAGAACTCAAATATCCCGAACTCTTTG
ATTTAACCAATCATATGTTAACTTTGTGTGATAATATTCATGGTTTCAAATATTTAATTGATGGATATGA
AGAAATTAATGAATTATTATATAAATTAAACTTTTATTTTGATTTATTAAGAGCAAAATTAAATGATGTA
TGTGCTAATGATTATTGTCAAATACCTTTCAATCTTAAAATTCGTGCAAATGAATTAGACGTACTTAAAA
AACTTGTGTTCGGATATAGAAAACCATTAGACAATATTAAAGATAATGTAGGAAAAATGGAAGATTACAT
TAAAAAAAATAAAACAACCATAGCAAATATAAATGAATTAATTGAAGGAAGTAAGAAAACAATTGATCAA
AATAAGAATGCAGATAATGAAGAAGGAAAAAAAAAATTATACCAAGCTCAATATGATCTTTCTATTTACA
ATAAACAATTACAAGAAGCACATAATTTAATAAGCGTTTTAGAAAAACGTATTGACACTTTAAAAAAAAA
TGAAAACATAAAGAAATTACTTGAAGATATAGATAAAATTAAAACAGATGCCGAAAAACCCACTACTGGA
AGTAAACCAAATACTCTCCTTGATAAGAACAAAAAAATCGAGGAACACGAAGAAAAAATAAAAGAAATTG
CCAAAACTATTAAATTTAACATTGATAGTTTATTTACTGATCCACTTGAATTAGAATATTATTTAAGAGA
AAAAAATAAAAAAGTTGATGTAACACCTAAATCACAAGATCCTACGAAATCTGTTCAAATACCAAAAGTT
CCTTATCCAAATGGTATTGTATATCCTTTACCACTCACTGATATTCATAATTCATTAGCTGCAGATAATG
ATAAAAATTCATATGGTGATTTAATGAATCCTAATACTAAAGAAAAAATTAATGAAAAAATTATTACAGA
TAATAAGGAAAGAAAAATATTCATTAATAACATTAAAAAACAAATTGATTTAGAAGAAAAAAACATTAAT
CACACAAAAGAACAAAATAAAAAATTACTTGAAGATTATGAAAAGTCAAAAAAGGATTATGAAGAATTAC
TTGAAAAATTTTATGAAATGAAATTTAATAATAATTTTGACAAAGATGTCGTAGATAAAATATTCAGTGC
AAGATATACATATAATGTTGAAAAACAAAGATATAATAATAAATTTTCATCCTCTAATAATTCTGTATAT
AATGTTCAAAAATTAAAAAAGGCTCTTTCATATCTTGAAGATTATTCTTTAAGAAAAGGAATTTCTGAAA
AAGATTTTAATCATTATTATACTTTGAAAACTGGCCTCGAAGCTGATATAAAAAAATTAACAGAAGAAAT
AAAGAGTAGTGAAAACAAAATTCTAGAAAAAAATTTTAAAGGACTAACACATTCAGCAAATGCTTCCTTA
GAAGTATATGATATTGTAAAATTACAAGTACAAAAAGTTTTATTAATTAAAAAAATAGAAGACTTAAGAA
AGATAGAATTATTTTTAAAAAATGCACAACTAAAAGATAGTATTCATGTACCAAATATTTATAAACCACA
AAATAAACCAGAACCATATTATTTAATTGTATTAAAAAAAGAAGTAGATAAATTAAAAGAATTTATACCA
AAAGTAAAAGACATGTTAAAGAAAGAACAAGCTGTCTTATCAAGTATTACACAACCTTTAGTTGCAGCAA
GCGAAACAACTGAAGATGGGGGTCACTCCACACACACATTATCCCAATCAGGAGAAACAGAAGTAACAGA
AGAAACAGAAGAAACAGAAGAAACAGTAGGACACACAACAACGGTAACAATAACATTACCACCAAAAGAA
GTAAAAGTTGTTGAAAATTCAATAGAACATAAGAGTAATGACAATTCACAAGCCTTGACAAAAACAGTTT
ATCTAAAGAAATTAGATGAATTTTTAACTAAATCATATATATGTCATAAATATATTTTAGTATCAAACTC
TAGTATGGACCAAAAATTATTAGAGGTATATAATCTTACTCCAGAAGAAGAAAATGAATTAAAATCATGT
GATCCATTAGATTTATTATTTAATATTCAAAATAACATACCTGCTATGTATTCATTATATGATAGTATGA
ACAATGATTTACAACATCTCTTTTTTGAATTATATCAAAAGGAAATGATTTATTATTTACATAAACTAAA
AGAGGAAAATCACATCAAAAAATTATTAGAGGAGCAAAAACAAATAACTGGAACATCATCTACATCCAGT
CCTGGAAATACAACCGTAAATACTGCTCAATCCGCAACTCACAGTAATTCCCAAAACCAACAATCAAATG
CATCCTCTACCAATACCCAAAATGGTGTAGCTGTATCATCTGGTCCTGCTGTAGTTGAAGAAAGTCATGA
TCCCTTAACAGTATTGTCTATTAGTAACGATTTGAAAGGTATTGTTAGTCTCTTAAATCTTGGAAATAAA
ACTAAAGTACCTAATCCATTAACCATTTCTACAACAGAGATGGAAAAATTTTATGAGAATATTTTAAAAA
ATAATGATACCTATTTTAATGATGATATCAAACAATTCGTAAAATCTAATTCAAAAGTAATTACAGGTTT
GACCGAAACACAAAAAAATGCATTAAATGATGAAATTAAAAAATTAAAAGATACTTTACAGTTATCATTT
GATTTATATAATAAATATAAATTAAAATTAGATAGATTATTTAATAAGAAAAAAGAACTTGGCCAAGACA
AAATGCAAATTAAAAAACTTACTTTATTAAAAGAACAATTAGAATCAAAATTGAATTCACTTAATAACCC
ACATAATGTATTACAAAACTTTTCTGTTTTCTTTAACAAAAAAAAAGAAGCTGAAATAGCAGAAACTGAA
AACACATTAGAAAACACAAAAATATTATTGAAACATTATAAAGGACTTGTTAAATATTATAATGGTGAAT
CATCTCCATTAAAAACTTTAAGTGAAGTATCAATTCAAACAGAAGATAATTATGCCAATTTAGAAAAATT
TAGAGTATTAAGTAAAATAGATGGAAAACTCAATGATAATTTACATTTAGGAAAGAAAAAATTATCTTTC
TTATCAAGTGGATTACATCATTTAATTACTGAATTAAAAGAAGTAATAAAAAATAAAAATTATACAGGTA
ATTCTCCAAGTGAAAATAATAAGAAAGTTAACGAAGCTTTAAAATCTTACGAAAATTTTCTCCCAGAAGC
AAAAGTTACAACAGTTGTAACTCCACCTCAACCAGATGTAACTCCATCTCCATTATCTGTAAGGGTAAGT
GGTAGTTCAGGATCCACAAAAGAAGAAACACAAATACCAACTTCAGGCTCTTTATTAACAGAATTACAAC
AAGTAGTACAATTACAAAATTATGACGAAGAAGATGATTCCTTAGTTGTATTACCCATTTTTGGAGAATC
CGAAGATAATGACGAATATTTAGATCAAGTAGTAACTGGAGAAGCAATATCTGTCACAATGGATAATATC
CTCTCAGGATTTGAAAATGAATATGATGTTATATATTTAAAACCTTTAGCTGGAGTATATAGAAGCTTAA
AAAAACAAATTGAAAAAAACATTTTTACATTTAATTTAAATTTGAACGATATCTTAAATTCACGTCTTAA
GAAACGAAAATATTTCTTAGATGTATTAGAATCTGATTTAATGCAATTTAAACATATATCCTCAAATGAA
TACATTATTGAAGATTCATTTAAATTATTGAATTCAGAACAAAAAAACACACTTTTAAAAAGTTACAAAT
ATATAAAAGAATCAGTAGAAAATGATATTAAATTTGCACAGGAAGGTATAAGTTATTATGAAAAGGTTTT
AGCGAAATATAAGGATGATTTAGAATCAATTAAAAAAGTTATCAAAGAAGAAAAGGAGAAGTTCCCATCA
TCACCACCAACAACACCTCCGTCACCAGCAAAAACAGACGAACAAAAGAAGGAAAGTAAGTTCCTTCCAT
TTTTAACAAACATTGAGACCTTATACAATAACTTAGTTAATAAAATTGACGATTACTTAATTAACTTAAA
GGCAAAGATTAACGATTGTAATGTTGAAAAAGATGAAGCACATGTTAAAATAACTAAACTTAGTGATTTA
AAAGCAATTGATGACAAAATAGATCTTTTTAAAAACCATAACGACTTCGAAGCAATTAAAAAATTGATAA
ATGATGATACGAAAAAAGATATGCTTGGCAAATTACTTAGTACAGGATTAGTTCAAAATTTTCCTAATAC
AATAATATCAAAATTAATTGAAGGAAAATTCCAAGATATGTTAAACATTTCACAACACCAATGCGTAAAA
AAACAATGTCCAGAAAATTCTGGATGTTTCAGACATTTAGATGAAAGAGAAGAATGTAAATGTTTATTAA
ATTACAAACAAGAAGGTGATAAATGTGTTGAAAATCCAAATCCTACTTGTAACGAAAATAATGGTGGATG
TGATGCAGATGCCAAATGTACCGAAGAAGATTCAGGTAGCAACGGAAAGAAAATCACATGTGAATGTACT
AAACCTGATTCTTATCCACTTTTCGATGGTATTTTCTGCAGTTCCTCTAACTTCTTAGGAATATCATTCT
TATTAATACTCATGTTAATATTATACAGTTTCATTTAA

>AB502475.1 Plasmodium falciparum msp1 gene for merozoite surface protein-1, complete cds, isolate: Tz98-115
ATGAAGATCATATTCTTTTTATGTTCATTTCTTTTTTTTATTATAAATACACAATGTGTAACACATGAAA
GTTATCAAGAACTTGTCAAAAAACTAGAAGCTTTAGAAGATGCAGTATTGACAGGTTATAGTTTATTTCA
AAAGGAAAAAATGGTATTAAATGAAGAAGAAATTACTACAAAAGGTGCAAGTGCTCAAAGTGGTGCAAGT
GCTCAAAGTGGTGCAAGTGCTCAAAGTGGTGCAAGTGCTCAAAGTGGTGCAAGTGCTCAAAGTGGTGCAA
GTGCTCAAAGTGGTACAAGTGGTCCAAGTGGTCCAAGTGGTCCAAGTGGTACAAGTCCATCATCTCGTTC
AAACACTTTACCTCGTTCAAATACTTCATCTGGTGCAAGCCCTCCAGCTGATGCAAGCGATTCAGATGCT
AAATCTTACGCTGATTTAAAACACAGAGTACGAAATTACTTGTTCACTATTAAAGAACTCAAATATCCCG
AACTCTTTGATTTAACCAATCATATGTTAACTTTGTGTGATAATATTCATGGTTTCAAATATTTAATTGA
TGGATATGAAGAAATTAATGAATTATTATATAAATTAAACTTTTATTTTGATTTATTAAGAGCAAAATTA
AATGATGTATGTGCTAATGATTATTGTCAAATACCTTTCAATCTTAAAATTCGTGCAAATGAATTAGACG
TACTTAAAAAACTTGTGTTCGGATATAGAAAACCATTAGACAATATTAAAGATAATGTAGGAAAAATGGA
AGATTACATTAAAAAAAATAAAACAACCATAGCAAATATAAATGAATTAATTGAAGGAAGTAAGAAAACA
ATTGATCAAAATAAGAATGCAGATAATGAAGAAGGAAAAAAAAAATTATACCAAGCTCAATATGATCTTT
CTATTTACAATAAACAATTAGAAGAAGCACATAATTTAATAAGCGTTTTAGAAAAACGTATTGACACTTT
AAAAAAAAATGAAAACATAAAGAAATTACTTGAAGATATAGATAAAATTAAAACAGATGCCGAAAAACCC
ACTACTGAAAGTAAACCAAATACTCTCCTTGATAAGAACAAAAAAATCGAGGAACACGAAGAAAAAATAA
AAGAAATTGCCAAAACTATTAAATTTAACATTGATAGTTTATTTACTGATCCACTTGAATTAGAATATTA
TTTAAGAGAAAAAAATAAAAAAGTTGATGTAACACCTAAATCACAAGATCCTACGAAATCTGTTCAAATA
CCAAAAGTTCCTTATCCAAATGGTATTGTATATCCTTTACCACTCACTGATATTCATAATTCATTAGCTG
CAGATAATGATAAAAATTCATATGGTGATTTAATGAATCCTCATACTAAAGAAAAAATTAATGAAAAAAT
TATTACAGATAATAAGGAAAGAAAAATATTCATTAATAACATTAAAAAACAAATTGATTTAGAAGAAAAA
AACATTAATCACACAAAAGAACAAAATAAAAAATTACTTGAAGATTATGAAAAGTCAAAAAAGGATTATG
AAAAATTACTTGAAAAATTTTATGAAATGAAATTTAATAATAATTTTGACAAAGATGTCGTAGATAAAAT
ATTCAGTGCAAGATATACATATAATGTTGAAAAACAAAGATATAATAATAAATTTTCATCCTCTAATAAT
TCTGTATATAATGTTCAAAAATTAAAAAAGGCTCTTTCATATCTTGAAGATTATTCTTTAAGAAAAGGAA
TTTCTGAAAAAGATTTTAATCATTATTATACTTTGAAAACTGGCCTCGAAGCTGATATAAAAAAATTAAC
AGAAGAAATAAAGAGTAGTGAAAACAAAATTCTAGAAAAAAATTTTAAAGGACTAACACATTCAGCAAAT
GCTTCCTTAGAAGTATCTGATATTGTAAAATTACAAGTACAAAAAGTTTTATTAATTAAAAAAATAGAAG
ACTTAAGAAAGATAGAATTATTTTTAAAAAATGCACAACTAAAAGATAGTATTCATGTACCAAATATTTA
TAAACCACAAAATAAACCAGAACCATATTATTTAATTGTATTAAAAAAAGAAGTAGATAAATTAAAAGAA
TTTATACCAAAAGTAAAAGACATGTTAAAGAAAGAACAAGCTGTCTTATCAAGTATTACACAACCTTTAG
TTGCAGCAAGCGAAACAACTGAAGATGGGGGTCACTCCACACACACATTATCCCAATCAGGAGAAACAGA
AGTAACAGAAGAAACAGAAGAAACAGTAGGACACACAACAACGGTAACAATAACATTACCACCAAAAGAA
GTAAAAGTTGTTGAAAATTCAATAGAAAATAAGAGTAATGACAATTCACAAGCCTTGACAAAAACAGTTT
ATCTAAAGAAATTAGATGAATTTTTAACTAAATCATATATATGTCATAAATATATTTTAGTATCAAACTC
TAGTATGGACCAAAAATTATTAGAGGTATATAATCTTACTCCAGAAGAAAAAAATGAATTAAAATCATGT
GATCCATTAGATTTATTATTTAATATTCAAAATAACATACCTGCTATGTATTCATTATATGATAGTATGA
ACAATGATTTACAACATCTCTTTTTTGAATTATATCAAAAGGAAATGATTTATTATTTACATAAACTAAA
AGAGGAAAATCACATCAAAAAATTATTAGAGGAGCAAAAACAAATAACTGGAACATCATCTACATCCAGT
CCTGGAAATACAACCGTAAATACTGCTCAATCCGCAACTCACAGTAATTCCCAAAACCAACAATCAAATG
CATCCTCTACCAATACCCAAAATGGTGTAGCTGTATCATCTGGTCCTGCTGTAGTTGAAGAAAGTCATGA
TCCCTTAACAGTATTGTCTATTAGTAACGATTTGAAAGGTATTGTTAGTCTCTTAAATCTTGGAAATAAA
ACTAAAGTACCTAATCCATTAACCATTTCTACAACAGAGATGGAAAAATTTTATGAGAATATTTTAAAAA
ATAATGATACCTATTTTAATGATGATATCAAACAATTCGTAAAATCTAATTCAAAAGTAATTACAGGTTT
GACCGAAACACAAAAAAATGCATTAAATGATGAAATTAAAAAATTAAAAGATACTTTACAGTTATCATTT
GATTTATATAATAAATATAAATTAAAATTAGATAGATTATTTAATAAGAAAAAAGAACTTGGCCAAGACA
AAATGCAAATTAAAAAACTTACTTTATTAAAAGAACAATTAGAATCAAAATTGAATTCACTTAATAACCC
ACATAATGTATTACAAAACTTTTCTGTTTTCTTTAACAAAAAAAAAGAAGCTGAAATAGCAGAAACTGAA
AACACATTAGAAAACACAAAAATATTATTGAAACATTATAAAGGACTTGTTAAATATTATAATGGTGAAT
CATCTCCATTAAAAACTTTAAGTGAAGTATCAATTCAAACAGAAGATAATTATGCCAATTTAGAAAAATT
TAGAGTATTAAGTAAAATAGATGGAAAACTCAATGATAATTTACATTTAGGAAAGAAAAAATTATCTTTC
TTATCAAGTGGATTACATCATTTAATTACTGAATTAAAAGAAGTAATAAAAAATAAAAATTATACAGGTA
ATTCTCCAAGTGAAAATAATAAGAAAGTTAACGAAGCTTTAAAATCTTACGAAAATTTTCTCCCAGAAGC
AAAAGTTACAACAGTTGTAACTCCACCTCAACCAGATGTAACTCCATCTCCATTATCTGTAAGGGTAAGT
GGTAGTTCAGGATCCACAAAAGAAGAAACACAAATACCAACTTCAGGCTCTTTATTAACAGAATTACAAC
AAGTAGTACAATTACAAAATTATGACGAAGAAGATGATTCCTTAGTTGTATTACCCATTTTTGGAGAATC
CGAAGATAATGACGAATATTTAGATCAAGTAGTAACTGGAGAAGCAATATCTGTCACAATGGATAATATC
CTCTCAGGATTTGAAAATGAATATGATGTTATATATTTAAAACCTTTAGCTGGAGTATATAGAAGCTTAA
AAAAACAAATTGAAAAAAACATTTTTACATTTAATTTAAATTTGAACGATATCTTAAATTCACGTCTTAA
GAAACGAAAATATTTCTTAGATGTATTAGAATCTGATTTAATGCAATTTAAACATATATCCTCAAATGAA
TACATTATTGAAGATTCATTTAAATTATTGAATTCAGAACAAAAAAACACACTTTTAAAAAGTTACAAAT
ATATAAAAGAATCAGTAGAAAATGATATTAAATTTGCACAGGAAGGTATAAGTTATTATGAAAAGGTTTT
AGCGAAATATAAGGATGATTTAGAATCAATTAAAAAAGTTATCAAAGAAGAAAAGGAGAAGTTCCCATCA
TCACCACCAACAACACCTCCGTCACCAGCAAAAACAGACGAACAAAAGAAGGAAAGTAAGTTCCTTCCAT
TTTTAACAAACATTGAGACCTTATACAATAACTTAGTTAATAAAATTGACGATTACTTAATTAACTTAAA
GGCAAAGATTAACGATTGTAATGTTGAAAAAGATGAAGCACATGTTAAAATAACTAAACTTAGTGATTTA
AAAGCAATTGATGACAAAATAGATCTTTTTAAAAACACTGACGACTTCGAAGCAATTAAAAAATTGATAA
ATGATGATACGAAAAAAGATATGCTTGGCAAATTACTTAGTACAGGATTAGTTCAAAATTTTCCTAATAC
AATAATATCAAAATTAATTGAAGGAAAATTCCAAGATATGTTAAACATTTCACAACACCAATGCGTAAAA
AAACAATGTCCACAAAATTCTGGATGTTTCAGACATTTAGATGAAAGAGAAGAATGTAAATGTTTATTAA
ATTACAAACAAGAAGGTGATAAATGTGTTGAAAATCCAAATCCTACTTGTAACGAAAATAATGGTGGATG
TGATGCAGATGCCAAATGTACCGAAGAAGATTCAGGTAGCAACGGAAAGAAAATCACATGTGAATGTACT
AAACCTGATTCTTATCCACTTTTCGATGGTATTTTCTGCAGTTCCTCTAACTTCTTAGGAATATCATTCT
TATTAATACTCATGTTAATATTATACAGTTTCATTTAA

>AB502476.1 Plasmodium falciparum msp1 gene for merozoite surface protein-1, complete cds, isolate: Tz98-119
ATGAAGATCATATTCTTTTTATGTTCATTTCTTTTTTTTATTATAAATACACAATGTGTAACACATGAAA
GTTATCAAGAACTTGTCAAAAAACTAGAAGCTTTAGAAGATGCAGTATTGACAGGTTATAGTTTATTTCA
AAAGGAAAAAATGGTATTAAATGAAGGAACAAGTGGAACAGCTGTTACAACTAGTACACCTGGTTCAAAG
GGTTCAGTTACTTCAGGTGGTTCAGGTGGTTCAGGTGGTTCAGTTGCTTCAGGTGGTTCAGTTGCTTCAG
GTGGCTCAGTTGCTTCAGGTGGCTCAGTTGCTTCAGGTGGCTCAGTTGCTTCAGGTGGCTCAGTTGCTTC
AGGTGGTTCAGGTAATTCAAGACGTACAAATCCTTCAGATAATTCAAGTGATTCAGATGCTAAATCTTAC
GCTGATTTAAAACATAGAGTTCAAAATTACTTGTTCACTATTAAAGAACTCAAATATCCCGAACTCTTTG
ATTTAACCAATCATATGTTAACTTTGTGTGATAATATTCATGGTTTCAAATATTTAATTGATGGATATGA
AGAAATTAATGAATTATTATATAAATTAAACTTTTATTATGATTTATTAAGAGCAAAATTAAATGATGTA
TGTGCTAATGATTATTGTCAAATACCTTTCAATCTTAAAATTCGTGCAAATGAATTAGACGTACTTAAAA
AACTTGTGTTCGGATATAGAAAACCATTAGACAATATTAAAGATAATGTAGGAAAAATGGAAGATTACAT
TAAAAAAAATAAAACAACCATAGCAAATATAAATGAATTAATTGAAGGAAGTAAGAAAACAATTGATCAA
AATAAGAATGCAGATAATGAAGAAGGAAAAAAAAAATTATACCAAGCTCAATATGATCTTTCTATTTACA
ATAAACAATTAGAAGAAGCACATAATTTAATAAGCGTTTTAGAAAAACGTATTGACACTTTAAAAAAAAA
TGAAAACATAAAGAAATTACTTGAAGATATAGATAAAATTAAAACAGATGCCGAAAAACTCACTACTGGA
AGTAAACCAAATACTCTCCTTGATAAGAACAAAAAAATCGAGGAACACGAAGAAAAAATAAAAGAAATTG
CCAAAACTATTAAATTTAACATTGATAGTTTATTTACTGATCCACTTGAATTAGAATATTATTTAAGAGA
AAAAAATAAAAAAGTTGATGTAACACCTAAATCACAAGATCCTACGAAATCTGTTCAAATACCAAAAGTT
CCTTATCCAAATGGTATTGTATATCCTTTACCACTCACTGATATTCATAATTCATTAGCTGCAGATAATG
ATAAAAATTCATATGGTGATTTAATGAATCCTAATACTAAAGAAAAAATTAATGAAAAAATTATTACAGA
TAATAAGGAAAGAAAAATATTCATTAATAACATTAAAAAACAAATTGATTTAGAAGAAAACAACATTAAT
CACACAAAAGAACAAAATAAAAAATTACTTGAAGATTATGAAAAGTCAAAAAAGGATTATGAAGAATTAC
TTGAAAAATTTTATGAAATGAAATTTAATAATAATTTTGACAAAGATGTCGTAGATAAAATATTCAGTGC
AAGATATACATATAATGTTGAAAAACAAAGATATAATAATAAATTTTCATCCTCTAATAATTCTGTATAT
AATGTTCAAAAATTAAAAAAGGCTCTTTCATATCTTGAAGATTATTCTTTAAGAAAAGGAATTTCTGAAA
AAGATTTTAATCATTATTATACTTTGAAAACTGGCCTCGAAGCTGATATAAAAAAATTAACAGAAGAAAT
AAAGAGTAGTGAAAACAAAATTCGAGAAAAAAATTTTAAAGGACTAACACATTCAGCAAATGCTTCCTTA
GAAGTATATGATATTGTAAAATTACAAGTACAAAAAGTTTTATTAATTAAAAAAATAGAAGACTTAAGAA
AGATAGAATTATTTTTAAAAAATGCACAACTAAAAGATAGTATTCATGTACCAAATATTTATAAACCACA
AAATAAACCAGAACCATATTATTTAATTGTATTAAAAAAAGAAGTAGATAAATTAAAAGAATTTATACCA
AAAGTAAAAGACATGTTAAAGAAAGAACAAGCTGTCTTATCAAGTATTACACAACCTTTAGTTGCAGCAA
GCGAAACAACTGAAGATGGGGGTCACTCCACACACACATTATCCCAATCAGGAGAAACAGAAGTAACAGA
AGAAACAGAAGAAACAGAAGAAACAGTAGGACACACAACAACGGTAACAATAACATTACCACCAACACAA
CCATCACCACCAAAAGAAGTAAAAGTTGTTGAAAATTCAATAGAACATAAGAGTAATGACAATTCACAAG
CCTTGACAAAAACAGTTTATCTAAAGAAATTAGATGAATTTTTAACTAAATCATATATATGTCATAAATA
TATTTTAGTATCAAACTCTAGTATGGACCAAAAATTATTAGAGGTATATAATCTTACTCCAGAAGAAAAA
AATGAATTAAAATCATGTGATCCATTAGATTTATTATTTAATATTCAAAATAACATACCTGCTATGTATT
CATTATATGATAGTATGAACAATGATTTACAACATCTCTTTTTTGAATTATATCAAAAGGAAATGATTTA
TTATTTACATAAACTAAAAGAGGAAAATCACATCAAAAAATTATTAGAGGAGCAAAAACAAATAACTGGA
ACATCATCTACATCCAGTCCTGGAAATACAACCGTAAATACTGCTCAATCCGCAACTCACAGTAATTCCC
AAAACCAACAATCAAATGCATCCTCTACCAATACCCAAAATGGTGTAGCTGTATCATCTGGTCCTGCTGT
AGTTGAAGAAAGTCATGATCCCTTAACAGTATTGTCTATTAGTAACGATTTGAAAGGTATTGTTAGTCTC
TTAAATCTTGGAAATAAAACTAAAGTACCTAATCCATTAACCATTTCTACAACAGAGATGGAAAAATTTT
ATGAGAATATTTTAAAAAATAATGATACCTATTTTAATGATGATATCAAACAATTCGTAAAATCTAATTC
AAAAGTAATTACAGGTTTGACCGAAACACAAAAAAATGCATTAAATGATGAAATTAAAAAATTAAAAGAT
ACTTTACAGTTATCATTTGATTTATATAATAAATATAAATTAAAATTAGATAGATTATTTAATAAGAAAA
AAGAACTTGGCCAAGACAAAATGCAAATTAAAAAACTTACTTTATTAAAAGAACAATTAGAATCAAAATT
GAATTCACTTAATAACCCACATAATGTATTACAAAACTTTTCTGTTTTCTTTAACAAAAAAAAAGAAGCT
GAAATAGCAGAAACTGAAAACACATTAGAAAACACAAAAATATTATTGAAACATTATAAAGGACTTGTTA
AATATTATAATGGTGAATCATCTCCATTAAAAACTTTAAGTGAAGTATCAATTCAAACAGAAGATAATTA
TGCCAATTTAGAAAAATTTAGAGTATTAAGTAAAATAGATGGAAAACTCAATGATAATTTACATTTAGGA
AAGAAAAAATTATCTTTCTTATCAAGTGGATTACATCATTTAATTACTGAATTAAAAGAAGTAATAAAAA
ATAAAAATTATACAGGTAATTCTCCAAGTGAAAATAATAAGAAAGTTAACGAAGCTTTAAAATCTTACGA
AAATTTTCTCCCAGAAGCAAAAGTTACAACAGTTGTAACTCCACCTCAACCAGATGTAACTCCATCTCCA
TTATCTGTAAGGGTAAGTGGTAGTTCAGGATCCACAAAAGAAGAAACACAAATACCAACTTCAGGCTCTT
TATTAACAGAATTACAACAAGTAGTACAATTACAAAATTATGACGAAGAAGATGATTCCTTAGTTGTATT
ACCCATTTTTGGAGAATCCGAAGATAATGACGAATATTTAGATCAAGTAGTAACTGGAGAAGCAATATCT
GTCACAATGGATAATATCCTCTCAGGATTTGAAAATGAATATGATGTTATATATTTAAAACCTTTAGCTG
GAGTATATAGAAGCTTAAAAAAACAAATTGAAAAAAACATTTTTACATTTAATTTAAATTTGAACGATAT
CTTAAATTCACGTCTTAAGAAACGAAAATATTTCTTAGATGTATTAGAATCTGATTTAATGCAATTTAAA
CATATATCCTCAAATGAATACATTATTGAAGATTCATTTAAATTATTGAATTCAGAACAAAAAAACACAC
TTTTAAAAAGTTACAAATATATAAAAGAATCAGTAGAAAATGATATTAAATTTGCACAGGAAGGTATAAG
TTATTATGAAAAGGTTTTAGCGAAATATAAGGATGATTTAGAATCAATTAAAAAAGTTATCAAAGAAGAA
AAGGAGTTCCCATCATCACCACCAACAACACCTCCGTCACCAGCAAAAACAGACGAACAAAAGAAGGAAA
GTAAGTTCCTTCCATTTTTAACAAACATTGAGACCTTATACAATAACTTAGTTAATAAAATTGACGATTA
CTTAATTAACTTAAAGGCAAAGATTAACGATTGTAATGTTGAAAAAGATGAAGCACATGTTAAAATAACT
AAACTTAGTGATTTAAAAGCAATTGATGACAAAATAGATCTTTTTAAAAACCATAACGACTTCGAAGCAA
TTAAAAAATTGATAAATGATGATACGAAAAAAGATATGCTTGGCAAATTACTTAGTACAGGATTAGTTCA
AAATTTTCCTAATACAATAATATCAAAATTAATTGAAGGAAAATTCCAAGATATGTTAAACATTTCACAA
CACCAATGCGTAAAAAAACAATGTCCAGAAAATTCTGGATGTTTCAGACATTTAGATGAAAGAGAAGAAT
GTAAATGTTTATTAAATTACAAACAAGAAGGTGATAAATGTGTTGAAAATCCAAATCCTACTTGTAACGA
AAATAATGGTGGATGTGATGCAGATGCCAAATGTACCGAAGAAGATTCAGGTAGCAGCAGAAAGAAAATC
ACATGTGAATGTACTAAACCTGATTCTTATCCACTTTTCGATGGTATTTTCTGCAGTTCCTCTAACTTCT
TAGGAATATCATTCTTATTAATACTCATGTTAATATTATACAGTTTCATTTAA

>AB502477.1 Plasmodium falciparum msp1 gene for merozoite surface protein-1, complete cds, isolate: Tz93-007
ATGAAGATCATATTCTTTTTATGTTCATTTCTTTTTTTTATTATAAATACACAATGTGTAACACATGAAA
GTTATCAAGAACTTGTCAAAAAACTAGAAGCTTTAGAAGATGCAGTATTGACAGGTTATAGTTTATTTCA
AAAGGAAAAAATGGTATTAAAGGATGGAGCAAATACTCAAGTTGTTGCAAAGCCTGCAGATGCTGTAAGT
ACTCAAAGTGCTAAAAATCCTCCAGGTGCTACAGTACCTTCAGGTACTGCAAGTACTAAAGGTGCTATAA
GATCTCCAGGTGCTGCAAATCCTTCAGATGATTCAAGTGATTCAGATGCTAAATCTTACGCTGATTTAAA
ACATAGAGTTCAAAATTACTTGTTCACTATTAAAGAACTCAAATATCCCGAACTCTTTGATTTAACCAAT
CATATGTTAACTTTGTGTGATAATATTCATGGTTTCAAATATTTAATTGATGGATATGAAGAAATTAATG
AATTATTATATAAATTAAACTTTTATTTTGATTTATTAAGAGCAAAATTAAATGATGTATGTGCTAATGA
TTATTGTCAAATACCTTTCAATCTTAAAATTCGTGCAAATGAATTAGACGTACTTAAAAAACTTGTGTTC
GGATATAGAAAACCATTAGACAATATTAAAGATAATGTAGGAAAAATGGAAGATTACATTAAAAAAAATA
AAACAACCATAGCAAATATAAATGAATTAATTGAAGGAAGTAAGAAAACAATTGATCAAAATAAGAATGC
AGATAATGAAGAAGGAAAAAAAAAATTATACCAAGCTCAATATGATCTTTCTATTTACAATAAACAATTA
GAAGAAGCACATAATTTAATAAGCGTTTTAGAAAAACGTATTGACACTTTAAAAAAAAATGAAAACATAA
AGAAATTACTTGAAGATATAGATAAAATTAAAACAGATGCCGAAAAACCCACTACTGGAAGTAAACCAAA
TACTCTCCTTGATAAGAACAAAAAAATCGAGGAACACGAAGAAAAAATAAAAGAAATTGCCAAAACTATT
AAATTTAACATTGATAGTTTATTTACTGATCCACTTGAATTAGAATATTATTTAAGAGAAAAAAATAAAA
AAGTTGATGTAACACCTAAATCACAAGATCCTACGAAATCTGTTCAAATACCAAAAGTTCCTTATCCAAA
TGGTATTGTATATCCTTTACCACTCACTGATATTCATAATTCATTAGCTGCAGATAATGATAAAAATTCA
TATGGTGATTTAATGAATCCTGATACTAAAGAAAAAATTAATGAAAAAATTATTACAGATAATAAGGAAA
GAAAAATATTCATTAATAACATTAAAAAACAAATTGATTTAGAAGAAAAAAACATTAATCACACAAAAGA
ACAAAATAAAAAATTACTTGAAGATTATGAAAAGTCAAAAAAGGATTATGAAGAATTACTTGAAAAATTT
TATGAAATGAAATTTAATAATAATTTTAACAAAGATGTCGTAGATAAAATGTTCAGTGCAAGATATACAT
ATAATGTTGAAAAACAAAGATATAATAATAAATTTTCATCCTCTAATAATTCTGTATATAATGTTCAAAA
ATTAAAAAAGGCTCTTTCATATCTTGAAGATTATTCTTTAAGAAAAGGAATTTCTGAAAAAGATTTTAAT
CATTATTATACTTTGAAAACTGGCCTCGAAGCTGATATAAAAAAATTAACAGAAGAAATAAAGAGTAGTG
AAAACAAAATTCTAGAAAAAAATTTTAAAGGACTAACACATTCAGCAAATGCTTCCTTAGAAGTATATGA
TATTGTAAAATTACAAGTACAAAAAGTTTTATTAATTAAAAAAATAGAAGACTTAAGAAAGATAGAATTA
TTTTTAAAAAATGCACAACTAAAAGATAGTATTCATGTACCAAATATTTATAAACCACAAAATAAACCAG
AACCATATTATTTAATTGTATTAAAAAAAGAAGTAGATAAATTAAAAGAATTTATACCAAAAGTAAAAGA
CATGTTAAAGAAAGAACAAGCTGTCTTATCAAGTATTACACAACCTTTAGTTGCAGCAAGCGAAACAACT
GAAGATGGGGGTCACTCCACACACACATTATCCCAATCAGGAGAAACAGAAGTAACAGAAGAAACAGAAG
AAACAGAAGAAACAGTAGGACACACAACAACGGTAACAATAACATTACCACCAACACAACCATCACCACC
AAAAGAAGTAAAAGTTGTTGAAAATTCAATAGAACATAAGAGTAATGACAATTCACAAGCCTTGACAAAA
ACAGTTTATCTAAAGAAATTAGATGAATTTTTAACTAAATCATATATATGTCATAAATATATTTTAGTAT
CAAACTCTAGTATGGACCAAAAATTATTAGAGGTATATAATCTTACTCCAGAAGAAAAAAATGAATTAAA
ATCATGTGATCCATTAGATTTATTATTTAATATTCAAAATAACATACCTGCTATGTATTCATTATATGAT
AGTATGAACAATGATTTACAACATCTCTTTTTTGAATTATATCAAAAGGAAATGATTTATTATTTACATA
AACTAAAAGAGGAAAATCACATCAAAAAATTATTAGAGGAGCAAAAACAAATAACTGGAACATCATCTAC
ATCCAGTCCTGGAAATACAACCGTAAATACTGCTCAATCCGCAACTCACAGTAATTCCCAAAACCAACAA
TCAAATGCATCCTCTACCAATACCCAAAATGGTGTAGCTGTATCATCTGGTCCTGCTGTAGTTGAAGAAA
GTCATGATCCCTTAACAGTATTGTCTATTAGTAACGATTTGAAAGGTATTGTTAGTCTCTTAAATCTTGG
AAATAAAACTAAAGTACCTAATCCATTAACCATTTCTACAACAGAGATGGAAAAATTTTATGAGAATATT
TTAAAAAATAATGATACCTATTTTAATGATGATATCAAACAATTCGTAAAATCTAATTCAAAAGTAATTA
CAGGTTTGACCGAAACACAAAAAAATGCATTAAATGATGAAATTAAAAAATTAAAAGATACTTTACAGTT
ATCATTTGATTTATATAATAAATATAAATTAAAATTAGATAGATTATTTAATAAGAAAAAAGAACTTGGC
CAAGACAAAATGCAAATTAAAAAACTTACTTTATTAAAAGAACAATTAGAATCAAAATTGAATTCACTTA
ATAACCCACATAATGTATTACAAAACTTTTCTGTTTTCTTTAACAAAAAAAAAGAAGCTGAAATAGCAGA
AACTGAAAACACATTAGAAAACACAAAAATATTATTGAAACATTATAAAGGACTTGTTAAATATTATAAT
GGTGAATCATCTCCATTAAAAACTTTAAGTGAAGTATCAATTCAAACAGAAGATAATTATGCCAATTTAG
AAAAATTTAGAGTATTAAGTAAAATAGATGGAAAACTCAATGATAATTTACATTTAGGAAAGAAAAAATT
ATCTTTCTTATCAAGTGGATTACATCATTTAATTACTGAATTAAAAGAAGTAATAAAAAATAAAAATTAT
ACAGGTAATTCTCCAAGTGAAAATAATAAGAAAGTTAACGAAGCTTTAAAATCTTACGAAAATTTTCTCC
CAGAAGCAAAAGTTACAACAGTTGTAACTCCACCTCAACCAGATGTAACTCCATCTCCATTATCTGTAAG
GGTAAGTGGTAGTTCAGGATCCACAAAAGAAGAAACACAAATACCAACTTCAGGCTCTTTATTAACAGAA
TTACAACAAGTAGTACAATTACAAAATTATGACGAAGAAGATGATTCCTTAGTTGTATTACCCATTTTTG
GAGAATCCGAAGATAATGACGAATATTTAGATCAAGTAGTAACTGGAGAAGCAATATCTGTCACAATGGA
TAATATCCTCTCAGGATTTGAAAATGAATATGATGTTATATATTTAAAACCTTTAGCTGGAGTATATAGA
AGCTTAAAAAAACAAATTGAAAAAAACATTTTTACATTTAATTTAAATTTGAACGATATCTTAAATTCAC
GTCTTAAGAAACGAAAATATTTCTTAGATGTATTAGAATCTGATTTAATGCAATTTAAACATATATCCTC
AAATGAATACATTATTGAAGATTCATTTAAATTATTGAATTCAGAACAAAAAAACACACTTTTAAAAAGT
TACAAATATATAAAAGAATCAGTAGAAAATGATATTAAATTTGCACAGGAAGGTATAAGTTATTATGAAA
AGGTTTTAGCGAAATATAAGGATGATTTAGAATCAATTAAAAAAGTTATCAAAGAAGAAAAGGAGAAGTT
CCCATCATCACCACCAACAACACCTCCGTCACCAGCAAAAACAGACGAACAAAAGAAGGAAAGTAAGTTC
CTTCCATTTTTAACAAACATTGAGACCTTATACAATAACTTAGTTAATAAAATTGACGATTACTTAATTA
ACTTAAAGGCAAAGATTAACGATTGTAATGTTGAAAAAAATGAAGCACATGTTAAAATAACTAAACTTAG
TGATTTAAAAGCAATTGATGACAAAATAGATCTTTTTAAAAACCATAACGACTTCGAAGCAATTAAAAAA
TTGATAAATGATGATACGAAAAAAGATATGCTTGGCAAATTACTTAGTACAGGATTAGTTCAAAATTTTC
CTAATACAATAATATCAAAATTAATTGAAGGAAAATTCCAAGATATGTTAAACATTTCACAACACCAATG
CGTAAAAAAACAATGTCCAGAAAATTCTGGATGTTTCAGACATTTAGATGAAAGAGAAGAATGTAAATGT
TTATTAAATTACAAACAAGAAGGTGATAAATGTGTTGAAAATCCAAATCCTACTTGTAACGAAAATAATG
GTGGATGTGATGCAGATGCCAAATGTACCGAAGAAGATTCAGGTAGCAACGGAAAGAAAATCACATGTGA
ATGTACTAAACCTGATTCTTATCCACTTTTCGATGGTATTTTCTGCAGTTCCTCTAACTTCTTAGGAATA
TCATTCTTATTAATACTCATGTTAATATTATACAGTTTCATTTAA

>AB502478.1 Plasmodium falciparum msp1 gene for merozoite surface protein-1, complete cds, isolate: Tz93-008
ATGAAGATCATATTCTTTTTATGTTCATTTCTTTTTTTTATTATAAATACACAATGTGTAACACATGAAA
GTTATCAAGAACTTGTCAAAAAACTAGAAGCTTTAGAAGATGCAGTATTGACAGGTTATGGTTTATTTCA
TAAGGAAAAAATGATCTTAAATGAAGAAGAAATTACTACAAAAGGTGCAAGTGCTCAAAGTGGTACAAGT
GGTACAAGTGGTACAAGTGGTACAAGTGGTCCAAGTGGTACAAGTCCATCATCTCGTTCAAACACTTTAC
CTCGTTCAAATACTTCATCTGGTGCAAGCCCTCCAGCTGATGCAAGCCCTCCAGCTGATGCAAGCGATTC
AGATGCTAAATCTTACGCTGATTTAAAACACAGAGTACGAAATTACTTGTTCACTATTAAAGAACTCAAA
TATCCCGAACTCTTTGATTTAACCAATCATATGTTAACTTTGTGTGATAATATTCATGGTTTCAAATATT
TAATTGATGGATATGAAGAAATTAATGAATTATTATATAAATTAAACTTTTATTTTGATTTATTAAGAGC
AAAATTAAATGATGTATGTGCTAATGATTATTGTCAAATACCTTTCAATCTTAAAATTCGTGCAAATGAA
TTAGACGTACTTAAAAAACTTGTGTTCGGATATAGAAAACCATTAGACAATATTAAAGATAATGTAGGAA
AAATGGAAGATTACATTAAAAAAAATAAAACAACCATAGCAAATATAAATGAATTAATTGAAGGAAGTAA
GAAAACAATTGATCAAAATAAGAATGCAGATAATGAAGAAGGAAAAAAAAAATTATACCAAGCTCAATAT
GATCTTTCTATTTACAATAAACAATTAGAAGAAGCACATAATTTAATAAGCGTTTTAGAAAAACGTATTG
ACACTTTAAAAAAAAATGAAAACATTAAGGAATTACTTGATAAGATAAATGAAATTAAAAATCCCCCACC
GGCCAATTCTGGAAATACACCAAATACTCTCCTTGATAAGAACAAAAAAATCGAGGAACACGAAGAAAAA
ATAAAAGAAATTGCCAAAACTATTAAATTTAACATTGATAGTTTATTTACTGATCCACTTGAATTAGAAT
ATTATTTAAGAGAAAAAAATAAAAAAGTTGATGTAACACCTAAATCACAAGATCCTACGAAATCTGTTCA
AATACCAAAAGTTCCTTATCCAAATGGTATTGTATATCCTTTACCACTCACTGATATTCATAATTCATTA
GCTGCAGATAATGATAAAAATTCATATGGTGATTTAATGAATCCTGATACTAAAGAAAAAATTAATGAAA
AAATTATTACAGATAATAAGGAAAGAAAAATATTCATTAATAACATTAAAAAACAAATTGATTTAGAAGA
AAACAACATTAATCACACAAAAGAACAAAATAAAAAATTACTTGAAGATTATGAAAAGTCAAAAAAGGAT
TATGAAAAATTACTTGAAAAATTTTATGAAATGAAATTTAATAATAATTTTGACAAAGATGTCGTAGATA
AAATATTCAGTGCAAGATATACATATAATGTTGAAAAACAAAGATATAATAATAAATTTTCATCCTCTAA
TAATTCTGTATATAATGTTCAAAAATTAAAAAAGGCTCTTTCATATCTTGAAGATTATTCTTTAAGAAAA
GGAATTTCTGAAAAAGATTTTAATCATTATTATACTTTGAAAACTGGCCTCGAAGCTGATATAAAAAAAT
TAACAGAAGAAATAAAGAGTAGTGAAAACAAAATTCTAGAAAAAAATTTTAAAGGACTAACACATTCAGC
AAATGCTTCCTTAGAAGTATATGATATTGTAAAATTACAAGTACAAAAAGTTTTATTAATTAAAAAAATA
GAAGACTTAAGAAAGATAGAATTATTTTTAAAAAATGCACAACTAAAAGATAGTATTCATGTACCAAATA
TTTATAAACCACAAAATAAACCAGAACCATATTATTTAATTGTATTAAAAAAAGAAGTAGATAAATTAAA
AGAATTTATACCAAAAGTAAAAGACATGTTAAAGAAAGAACAAGCTGTCTTATCAAGTATTACACAACCT
TTAGTTGCAGCAAGCGAAACAACTGAAGATGGGGGTCACTCCACACACACATTATCCCAATCAGGAGAAA
CAGAAGTAACAGAAGAAACAGAAGAAACAGAAGAAACAGTAGGACACACAACAACGGTAACAATAACATT
ACCACCAAAAGAAGTAAAAGTTGTTGAAAATTCAATAGAACATAAGAGTAATGACAATTCACAAGCCTTG
ACAAAAACAGTTTATCTAAAGAAATTAGATGAATTTTTAACTAAATCATATATATGTCATAAATATATTT
TAGTATCAAACTCTAGTATGGACCAAAAATTATTAGAGGTATATAATCTTACTCCAGAAGAAAAAAATGA
ATTAAAATCATGTGATCCATTAGATTTATTATTTAATATTCAAAATAACATACCTGCTATGTATTCATTA
TATGATAGTATGAACAATGATTTACAACATCTCTTTTTTGAATTATATCAAAAGGAAATGATTTATTATT
TACATAAACTAAAAGAGGAAAATCACATCAAAAAATTATTAGAGGAGCAAAAACAAATAACTGGAACATC
ATCTACATCCAGTCCTGGAAATACAACCGTAAATACTGCTCAATCCGCAACTCACAGTAATTCCCAAAAC
CAACAATCAAATGCATCCTCTACCAATACCCAAAATGGTGTAGCTGTATCATCTGGTCCTGCTGTAGTTG
AAGAAAGTCATGATCCCTTAACAGTATTGTCTATTAGTAACGATTTGAAAGGTATTGTTAGTCTCTTAAA
TCTTGGAAATAAAACTAAAGTACCTAATCCATTAACCATTTCTACAACAGAGATGGAAAAATTTTATGAG
AATATTTTAAAAAATAATGATACCTATTTTAATGATGATATCAAACAATTCGTAAAATCTAATTCAAAAG
TAATTACAGGTTTGACCGAAACACAAAAAAATGCATTAAATGATGAAATTAAAAAATTAAAAGATACTTT
ACAGTTATCATTTGATTTATATAATAAATATAAATTAAAATTAGATAGATTATTTAATAAGAAAAAAGAA
CTTGGCCAAGACAAAATGCAAATTAAAAAACTTACTTTATTAAAAGAACAATTAGAATCAAAATTGAATT
CACTTAATAACCCACATAATGTATTACAAAACTTTTCTGTTTTCTTTAACAAAAAAAAAGAAGCTGAAAT
AGCAGAAACTGAAAACACATTAGAAAACACAAAAATATTATTGAAACATTATAAAGGACTTGTTAAATAT
TATAATGGTGAATCATCTCCATTAAAAACTTTAAGTGAAGTATCAATTCAAACAGAAGATAATTATGCCA
ATTTAGAAAAATTTAGAGTATTAAGTAAAATAGATGGAAAACTCAATGATAATTTACATTTAGGAAAGAA
AAAATTATCTTTCTTATCAAGTGGATTACATCATTTAATTACTGAATTAAAAGAAGTAATAAAAAATAAA
AATTATACAGGTAATTCTCCAAGTGAAAATAATAAGAAAGTTAACGAAGCTTTAAAATCTTACGAAAATT
TTCTCCCAGAAGCAAAAGTTACAACAGTTGTAACTCCACCTCAACCAGATGTAACTCCATCTCCATTATC
TGTAAGGGTAAGTGGTAGTTCAGGATCCACAAAAGAAGAAACACAAATACCAACTTCAGGCTCTTTATTA
ACAGAATTACAACAAGTAGTACAATTACAAAATTATGACGAAGAAGATGATTCCTTAGTTGTATTACCCA
TTTTTGGAGAATCCGAAGATAATGACGAATATTTAGATCAAGTAGTAACTGGAGAAGCAATATCTGTCAC
AATGGATAATATCCTCTCAGGATTTGAAAATGAATATGATGTTATATATTTAAAACCTTTAGCTGGAGTA
TATAGAAGCTTAAAAAAACAAATTGAAAAAAACATTTTTACATTTAATTTAAATTTGAACGATATCTTAA
ATTCACGTCTTAAGAAACGAAAATATTTCTTAGATGTATTAGAATCTGATTTAATGCAATTTAAACATAT
ATCCTCAAATGAATACATTATTGAAGATTCATTTAAATTATTGAATTCAGAACAAAAAAACACACTTTTA
AAAAGTTACAAATATATAAAAGAATCAGTAGAAAATGATATTAAATTTGCACAGGAAGGTATAAGTTATT
ATGAAAAGGTTTTAGCGAAATATAAGGATGATTTAGAATCAATTAAAAAAGTTATCAAAGAAGAAAAGGA
GTTCCCATCATCACCACCAACAACACCTCCGTCACCAGCAAAAACAGACGAACAAAAGAAGGAAAGTAAG
TTCCTTCCATTTTTAACAAACATTGAGACCTTATACAATAACTTAGTTAATAAAATTGACGATTACTTAA
TTAACTTAAAGGCAAAGATTAACGATTGTAATGTTGAAAAAGATGAAGCACATGTTAAAATAACTAAACT
TAGTGATTTAAAAGCAATTGATGACAAAATAGATCTTTTTAAAAACCATAACGACTTCGAAGCAATTAAA
AAATTGATAAATGATGATACGAAAAAAGATATGCTTGGCAAATTACTTAGTACAGGATTAGTTCAAAATT
TTCCTAATACAATAATATCAAAATTAATTGAAGGAAAATTCCAAGATATGTTAAACATTTCACAACACCA
ATGCGTAAAAAAACAATGTCCACAAAATTCTGGATGTTTCAGACATTTAGATGAAAGAGAAGAATGTAAA
TGTTTATTAAATTACAAACAAGAAGGTGATAAATGTGTTGAAAATCCAAATCCTACTTGTAACGAAAATA
ATGGTGGATGTGATGCAGATGCCAAATGTACCGAAGAAGATTCAGGTAGCAACGGAAAGAAAATCACATG
TGAATGTACTAAACCTGATTCTTATCCACTTTTCGATGGTATTTTCTGCAGTTCCTCTAACTTCTTAGGA
ATATCATTCTTATTAATACTCATGTTAATATTATACAGTTTCATTTAA

>AB502479.1 Plasmodium falciparum msp1 gene for merozoite surface protein-1, complete cds, isolate: Tz93-009
ATGAAGATCATATTCTTTTTATGTTCATTTCTTTTTTTTATTATAAATACACAATGTGTAACACATGAAA
GTTATCAAGAACTTGTCAAAAAACTAGAAGCTTTAGAAGATGCAGTATTGACAGGTTATAGTTTATTTCA
AAAGGAAAAAATGGTATTAAATGAAGGAACAAGTGGAACAGCTGTTACAAGTAGTACACCTGGTTCAGTT
GCTTCAGGTGGTTCAGTTGCTTCAGGTGGTTCAGGTGGCTCAGTTGCTTCAGGTGGTTCAGGTGGCTCAG
TTGCTTCAGGTGGCTCAGTTGCTTCAGGTGGTTCAGGTAATTCAAGACGTACAAATCCTTCAGATAATTC
AAGTGATTCAGATGCTAAATCTTACGCTGATTTAAAACACAGAGTACGAAATTACTTGTTCACTATTAAA
GAACTCAAATATCCCGAACTCTTTGATTTAACCAATCATATGTTAACTTTGTGTGATAATATTCATGGTT
TCAAATATTTAATTGATGGATATGAAGAAATTAATGAATTATTATATAAATTAAACTTTTATTATGATTT
ATTAAGAGCAAAATTAAATGATGTATGTGCTAATGATTATTGTCAAATACCTTTCAATCTTAAAATTCGT
GCAAATGAATTAGACGTACTTAAAAAACTTGTGTTCGGATATAGAAAACCATTAGACAATATTAAAGATA
ATGTAGGAAAAATGGAAGATTACATTAAAAAAAATAAAACAACCATAGCAAATATAAATGAATTAATTGA
AGGAAGTAAGAAAACAATTGATCAAAATAAGAATGCAGATAATGAAGAAGGAAAAAAAAAATTATACCAA
GCTCAATATGATCTTTTTATTTACAATAAACAATTAGAAGAAGCACATAATTTAATAAGCGTTTTAGAAA
AACGTATTGACACTTTAAAAAAAAATGAAAACATAAAGAAATTACTTGAAGATATAGATAAAATTAAAAC
AGATGCCGAAAAACTCACTACTGGAAGTAAACCAAATACTCTCCTTGATAAGAACAAAAAAATCGAGGAA
CACGAAGAAAAAATAAAAGAAATTGCCAAAACTATTAAATTTAACATTGATAGTTTATTTACTGATCCAC
TTGAATTAGAATATTATTTAAGAGAAAAAAATAAAAAAGTTGATGTAACACCTAAATCACAAGATCCTAC
GAAATCTGTTCAAATACCAAAAGTTCCTTATCCAAATGGTATTGTATATCCTTTACCACTCACTGATATT
CATAATTCATTAGCTGCAGATAATGATAAAAATTCATATGGTGATTTAATGAATCCTGATACTAAAGAAA
AAATTAATGAAAAAATTATTACAGATAATAAGGAAAGAAAAATATTCATTAATAACATTAAAAAACAAAT
TGATTTAGAAGAAAAAAACATTAATCACACAAAAGAACAAAATAAAAAATTACTTGAAGATTATGAAAAG
TCAAAAAAGGATTATGAAGAATTACTTGAAAAATTTTATGAAATGAAATTTAATAATAATTTTGACAAAG
ATGTCGTAGATAAAATATTCAGAGCAAGATATACATATAATGTTGAAAAACAAAGATATAATAATAAATT
TTCATCCTCTAATAATTCTGTATATAATGTTCAAAAATTAAAAAAGGCTCTTTCATATCTTGAAGATTAT
TCTTTAAGAAAAGGAATTTCTGAAAAAGATTTTAATCATTATTATACTTTGAAAACTGGCCTCGAAGCTG
ATATAAAAAAATTAACAGAAGAAATAAAGAGTAGTGAAAACAAAATTCTAGAAAAAAATTTTAAAGGACT
AACACATTCAGCAAATGCTTCCTTAGAAGTATCTGATATTGTAAAATTACAAGTACAAAAAGTTTTATTA
ATTAAAAAAATAGAAGACTTAAGAAAGATAGAATTATTTTTAAAAAATGCACAACTAAAAGATAGTATTC
ATGTACCAAATATTTATAAACCACAAAATAAACCAGAACCATATTATTTAATTGTATTAAAAAAAGAAGT
AGATAAATTAAAAGAATTTATACCAAAAGTAAAAGACATGTTAAAGAAAGAACAAGCTGTCTTATCAAGT
ATTACACAACCTTTAGTTGCAGCAAGCGAAACAACTGAAGATGGGGGTCACTCCACACACACATTATCCC
AATCAGGAGAAACAGAAGTAACAGAAGAAACAGAAGAAACAGAAGAAACAGTAGGACACACAACAACGGT
AACAATAACATTACCACCAAAAGAAGTAAAAGTTGTTGAAAATTCAATAGAACATAAGAGTAATGACAAT
TCACAAGCCTTGACAAAAACAGTTTATCTAAAGAAATTAGATGAATTTTTAACTAAATCATATATATGTC
ATAAATATATTTTAGTATCAAACTCTAGTATGGACCAAAAATTATTAGAGGTATATAATCTTACTCCAGA
AGAAAAAAATGAATTAAAATCATGTGATCCATTAGATTTATTATTTAATATTCAAAATAACATACCTGCT
ATGTATTCATTATATGATAGTATGAACAATGATTTACAACATCTCTTTTTTGAATTATATCAAAAGGAAA
TGATTTATTATTTACATAAACTAAAAGAGGAAAATCACATCAAAAAATTATTAGAGGAGCAAAAACAAAT
AACTGGAACATCATCTACATCCAGTCCTGGAAATACAACCGTAAATACTGCTCAATCCGCAACTCACAGT
AATTCCCAAAACCAACAATCAAATGCATCCTCTACCAATACCCAAAATGGTGTAGCTGTATCATCTGGTC
CTGCTGTAGTTGAAGAAAGTCATGATCCCTTAACAGTATTGTCTATTAGTAACGATTTGAAAGGTATTGT
TAGTCTCTTAAATCTTGGAAATAAAACTAAAGTACCTAATCCATTAACCATTTCTACAACAGAGATGGAA
AAATTTTATGAGAATATTTTAAAAAATAATGATACCTATTTTAATGATGATATCAAACAATTCGTAAAAT
CTAATTCAAAAGTAATTACAGGTTTGACCGAAACACAAAAAAATGCATTAAATGATGAAATTAAAAAATT
AAAAGATACTTTACAGTTATCATTTGATTTATATAATAAATATAAATTAAAATTAGATAGATTATTTAAT
AAGAAAAAAGAACTTGGCCAAGACAAAATGCAAATTAAAAAACTTACTTTATTAAAAGAACAATTAGAAT
CAAAATTGAATTCACTTAATAACCCACATAATGTATTACAAAACTTTTCTGTTTTCTTTAACAAAAAAAA
AGAAGCTGAAATAGCAGAAACTGAAAACACATTAGAAAACACAAAAATATTATTGAAACATTATAAAGGA
CTTGTTAAATATTATAATGGTGAATCATCTCCATTAAAAACTTTAAGTGAAGTATCAATTCAAACAGAAG
ATAATTATGCCAATTTAGAAAAATTTAGAGTATTAAGTAAAATAGATGGAAAACTCAATGATAATTTACA
TTTAGGAAAGAAAAAATTATCTTTCTTATCAAGTGGATTACATCATTTAATTACTGAATTAAAAGAAGTA
ATAAAAAATAAAAATTATACAGGTAATTCTCCAAGTGAAAATAATAAGAAAGTTAACGAAGCTTTAAAAT
CTTACGAAAATTTTCTCCCAGAAGCAAAAGTTACAACAGTTGTAACTCCACCTCAACCAGATGTAACTCC
ATCTCCATTATCTGTAAGGGTAAGTGGTAGTTCAGGATCCACAAAAGAAGAAACACAAATACCAACTTCA
GGCTCTTTATTAACAGAATTACAACAAGTAGTACAATTACAAAATTATGACGAAGAAGATGATTCCTTAG
TTGTATTACCCATTTTTGGAGAATCCGAAGATAATGACGAATATTTAGATCAAGTAGTAACTGGAGAAGC
AATATCTGTCACAATGGATAATATCCTCTCAGGATTTGAAAATGAATATGATGTTATATATTTAAAACCT
TTAGCTGGAGTATATAGAAGCTTAAAAAAACAAATTGAAAAAAACATTTTTACATTTAATTTAAATTTGA
ACGATATCTTAAATTCACGTCTTAAGAAACGAAAATATTTCTTAGATGTATTAGAATCTGATTTAATGCA
ATTTAAACATATATCCTCAAATGAATACATTATTGAAGATTCATTTAAATTATTGAATTCAGAACAAAAA
AACACACTTTTAAAAAGTTACAAATATATAAAAGAATCAGTAGAAAATGATATTAAATTTGCACAGGAAG
GTATAAGTTATTATGAAAAGGTTTTAGCGAAATATAAGGATGATTTAGAATCAATTAAAAAAGTTATCAA
AGAAGAAAAGGAGAAGTTCCCATCATCACCACCAACAACACCTCCGTCACCAGCAAAAACAGACGAACAA
AAGAAGGAAAGTAAGTTCCTTCCATTTTTAACAAACATTGAGACCTTATACAATAACTTAGTTAATAAAA
TTGACGATTACTTAATTAACTTAAAGGCAAAGATTAACGATTGTAATGTTGAAAAAGATGAAGCACATGT
TAAAATAACTAAACTTAGTGATTTAAAAGCAATTGATGACAAAATAGATCTTTTTAAAAACCATAACGAC
TTCGAAGCAATTAAAAAATTGATAAATGATGATACGAAAAAAGATATGCTTGGCAAATTACTTAGTACAG
GATTAGTTCAAAATTTTCCTAATACAATAATATCAAAATTAATTGAAGGAAAATTCCAAGATATGTTAAA
CATTTCACAACACCAATGCGTAAAAAAACAATGTCCAGAAAATTCTGGATGTTTCAGACATTTAGATGAA
AGAGAAGAATGTAAATGTTTATTAAATTACAAACAAGAAGGTGATAAATGTGTTGAAAATCCAAATCCTA
CTTGTAACGAAAATAATGGTGGATGTGATGCAGATGCCAAATGTACCGAAGAAGATTCAGGTAGCAACGG
AAAGAAAATCACATGTGAATGTACTAAACCTGATTCTTATCCACTTTTCGATGGTATTTTCTGCAGTTCC
TCTAACTTCTTAGGAATATCATTCTTATTAATACTCATGTTAATATTATACAGTTTCATTTAA

>AB502480.1 Plasmodium falciparum msp1 gene for merozoite surface protein-1, complete cds, isolate: Tz93-013
ATGAAGATCATATTCTTTTTATGTTCATTTCTTTTTTTTATTATAAATACACAATGTGTAACACATGAAA
GTTATCAAGAACTTGTCAAAAAACTAGAAGCTTTAGAAGATGCAGTATTGACAGGTTATAGTTTATTTCA
AAAGGAAAAAATGGTATTAAATGAAGAAGAAATTACTACAAAAGGTGCAAGTGCTCAAAGTGGTGCAAGT
GCTCAAAGTGGTGCAAGTGCTCAAAGTGGTGCAAGTGCTCAAAGTGGTACAAGTGGTCCAAGTGGTCCAA
GTGGTACAAGTCCATCATCTCGTTCAAACACTTTACCTCGTTCAAATACTTCATCTGGTGCAAGCCCTCC
AGCTGATGCAAGCGATTCAGATGCTAAATCTTACGCTGATTTAAAACACAGAGTACGAAATTACTTGTTC
ACTATTAAAGAACTCAAATATCCCGAACTCTTTGATTTAACCAATCATATGTTAACTTTGTGTGATAATA
TTCATGGTTTCAAATATTTAATTGATGGATATGAAGAAATTAATGAATTATTATATAAATTAAACTTTTA
TTTTGATTTATTAAGAGCAAAATTAAATGATGTATGTGCTAATGATTATTGTCAAATACCTTTCAATCTT
AAAATTCGTGCAAATGAATTAGACGTACTTAAAAAACTTGTGTTCGGATATAGAAAACCATTAGACAATA
TTAAAGATAATGTAGGAAAAATGGAAGATTACATTAAAAAAAATAAAACAACCATAGCAAATATAAATGA
ATTAATTGAAGGAAGTAAGAAAACAATTGATCAAAATAAGAATGCAGATAATGAAGAAGGAAAAAAAAAA
TTATACCAAGCTCAATATGATCTTTCTATTTACAATAAACAATTAGAAGAAGCACATAATTTAATAAGCG
TTTTAGAAAAACGTATTGACACTTTAAAAAAAAATGAAAACATAAAGAAATTACTTGATAAGATAAATGA
AATTAAAAATCCCCCACCGGCCAATTCTGGAAATACACCAAATACTCTCCTTGATAAGAACAAAAAAATC
GAGGAACACGAAGAAAAAATAAAAGAAATTGCCAAAACTATTAAATTTAACATTGATAGTTTATTTACTG
ATCCACTTGAATTAGAATATTATTTAAGAGAAAAAAATAAAAAAGTTGATGTAACACCTAAATCACAAGA
TCCTACGAAATCTGTTCAAATACCAAAAGTTCCTTATCCAAATGGTATTGTATATCCTTTACCACTCACT
GATATTCATAATTCATTAGCTGCAGATAATGATAAAAATTCATATGGTGATTTAATGAATCCTGATACTA
AAGAAAAAATTAATGAAAAAATTATTACAGATAATAAGGAAAGAAAAATATTCATTAATAACATTAAAAA
ACAAATTGATTTAGAAGAAAAAAACATTAATCACACAAAAGAACAAAATAAAAAATTACTTGAAGATTAT
GAAAAGTCAAAAAAGGATTATGAAGAATTACTTGAAAAATTTTATGAAATGAAATTTAATAATAATTTTA
ACAAAGATGTCGTAGATAAAATATTCAGTGCAAGATATACATATAATGTTGAAAAACAAAGATATAATAA
TAAATTTTCATCCTCTAATAATTCTGTATATAATGTTCAAAAATTAAAAAAGGCTCTTTCATATCTTGAA
GATTATTCTTTAAGAAAAGGAATTTCTGAAAAAGATTTTAATCATTATTATACTTTGAAAACTGGCCTCG
AAGCTGATATAAAAAAATTAACAGAAGAAATAAAGAGTAGTGAAAACAAAATTCTAGAAAAAAATTTTAA
AGGACTAACACATTCAGCAAATGGTTCCTTAGAAGTATCTGATATTGTAAAATTACAAGTACAAAAAGTT
TTATTAATTAAAAAAATAGAAGACTTAAGAAAGATAGAATTATTTTTAAAAAATGCACAACTAAAAGATA
GTATTCATGTACCAAATATTTATAAACCACAAAATAAACCAGAACCATATTATTTAATTGTATTAAAAAA
AGAAGTAGATAAATTAAAAGAATTTATACCAAAAGTAAAAGACATGTTAAAGAAAGAACAAGCTGTCTTA
TCAAGTATTACACAACCTTTAGTTGCAGCAAGCGAAACAACTGAAGATGGGGGTCACTCCACACACACAT
TATCCCAATCAGGAGAAACAGAAGTAACAGAAGAAACAGAAGAAACAGTAGGACACACAACAACGGTAAC
AATAACATTACCACCAACACAACCATCACCACCAAAAGAAGTAAAAGTTGTTGAAAATTCAATAGAACAT
AAGAGTAATGACAATTCACAAGCCTTGACAAAAACAGTTTATCTAAAGAAATTAGATGAATTTTTAACTA
AATCATATATATGTCATAAATATATTTTAGTATCAAACTCTAGTATGGACCAAAAATTATTAGAGGTATA
TAATCTTACTCCAGAAGAAAAAAATGAATTAAAATCATGTGATCCATTAGATTTATTATTTAATATTCAA
AATAACATACCTGCTATGTATTCATTATATGATAGTATGAACAATGATTTACAACATCTCTTTTTTGAAT
TATATCAAAAGGAAATGATTTATTATTTACATAAACTAAAAGAGGAAAATCACATCAAAAAATTATTAGA
GGAGCAAAAACAAATAACTGGAACATCATCTACATCCAGTCCTGGAAATACAACCGTAAATACTGCTCAA
TCCGCAACTCACAGTAATTCCCAAAACCAACAATCAAATGCATCCTCTACCAATACCCAAAATGGTGTAG
CTGTATCATCTGGTCCTGCTGTAGTTGAAGAAAGTCATGATCCCTTAACAGTATTGTCTATTAGTAACGA
TTTGAAAGGTATTGTTAGTCTCTTAAATCTTGGAAATAAAACTAAAGTACCTAATCCATTAACCATTTCT
ACAACAGAGATGGAAAAATTTTATGAGAATATTTTAAAAAATAATGATACCTATTTTAATGATGATATCA
AACAATTCGTAAAATCTAATTCAAAAGTAATTACAGGTTTGACCGGAACACAAAAAAATGCATTAAATGA
TGAAATTAAAAAATTAAAAGATACTTTACAGTTATCATTTGATTTATATAATAAATATAAATTAAAATTA
GATAGATTATTTAATAAGAAAAAAGAACTTGGCCAAGACAAAATGCAAATTAAAAAACTTACTTTATTAA
AAGAACAATTAGAATCAAAATTGAATTCACTTAATAACCCACATAATGTATTACAAAACTTTTCTGTTTT
CTTTAACAAAAAAAAAGAAGCTGAAATAGCAGAAACTGAAAACACATTAGAAAACACAAAAATATTATTG
AAACATTATAAAGGACTTGTTAAATATTATAATGGTGAATCATCTCCATTAAAAACTTTAAGTGAAGTAT
CAATTCAAACAGAAGATAATTATGCCAATTTAGAAAAATTTAGAGTATTAAGTAAAATAGATGGAAAACT
CAATGATAATTTACATTTAGGAAAGAAAAAATTATCTTTCTTATCAAGTGGATTACATCATTTAATTACT
GAATTAAAAGAAGTAATAAAAAATAAAAATTATACAGGTAATTCTCCAAGTGAAAATAATAAGAAAGTTA
ACGAAGCTTTAAAATCTTACGAAAATTTTCTCCCAGAAGCAAAAGTTACAACAGTTGTAACTCCACCTCA
ACCAGATGTAACTCCATCTCCATTATCTGTAAGGGTAAGTGGTAGTTCAGGATCCACAAAAGAAGAAACA
CAAATACCAACTTCAGGCTCTTTATTAACAGAATTACAACAAGTAGTACAATTACAAAATTATGACGAAG
AAGATGATTCCTTAGTTGTATTACCCATTTTTGGAGAATCCGAAGATAATGACGAATATTTAGATCAAGT
AGTAACTGGAGAAGCAATATCTGTCACAATGGATAATATCCTCTCAGGATTTGAAAATGAATATGATGTT
ATATATTTAAAACCTTTAGCTGGAGTATATAGAAGCTTAAAAAAACAAATTGAAAAAAACATTTTTACAT
TTAATTTAAATTTGAACGATATCTTAAATTCACGTCTTAAGAAACGAAAATATTTCTTAGATGTATTAGA
ATCTGATTTAATGCAATTTAAACATATATCCTCAAATGAATACATTATTGAAGATTCATTTAAATTATTG
AATTCAGAACAAAAAAACACACTTTTAAAAAGTTACAAATATATAAAAGAATCAGTAGAAAATGATATTA
AATTTGCACAGGAAGGTATAAGTTATTATGAAAAGGTTTTAGCGAAATATAAGGATGATTTAGAATCAAT
TAAAAAAGTTATCAAAGAAGAAAAGGAGAAGTTCCCATCATCACCACCAACAACACCTCCGTCACCAGCA
AAAACAGACGAACAAAAGAAGGAAAGTAAGTTCCTTCCATTTTTAACAAACATTGAGACCTTATACAATA
ACTTAGTTAATAAAATTGACGATTACTTAATTAACTTAAAGGCAAAGATTAACGATTGTAATGTTGAAAA
AGATGAAGCACATGTTAAAATAACTAAACTTAGTGATTTAAAAGCAATTGATGACAAAATAGATCTTTTT
AAAAACCATAACGACTTCGAAGCAATTAAAAAATTGATAAATGATGATACGAAAAAAGATATGCTTGGCA
AATTACTTAGTACAGGATTAGTTCAAAATTTTCCTAATACAATAATATCAAAATTAATTGAAGGAAAATT
CCAAGATATGTTAAACATTTCACAACACCAATGCGTAAAAAAACAATGTCCACAAAATTCTGGATGTTTC
AGACATTTAGATGAAAGAGAAGAATGTAAATGTTTATTAAATTACAAACAAGAAGGTGATAAATGTGTTG
AAAATCCAAATCCTACTTGTAACGAAAATAATGGTGGATGTGATGCAGATGCCAAATGTACCGAAGAAGA
TTCAGGTAGCAACGGAAAGAAAATCACATGTGAATGTACTAAACCTGATTCTTATCCACTTTTCGATGGT
ATTTTCTGCAGTTCCTCTAACTTCTTAGGAATATCATTCTTATTAATACTCATGTTAATATTATACAGTT
TCATTTAA

>AB502481.1 Plasmodium falciparum msp1 gene for merozoite surface protein-1, complete cds, isolate: Tz03-015
ATGAAGATCATATTCTTTTTATGTTCATTTCTTTTTTTTATTATAAATACACAATGTGTAACACATGAAA
GTTATCAAGAACTTGTCAAAAAACTAGAAGCTTTAGAAGATGCAGTATTGACAGGTTATGGTTTATTTCA
TAAGGAAAAAATGATCTTAAATGAAGAAGAAATTACTACAAAAGGTGCAAGTGCTCAAAGTGGTACAAGT
GGTACAAGTGGTACAAGTGGTACAAGTGGTACAAGTGGTACAAGTGGTCCAAGTGGTCCAAGTGGTCCAA
GTGGTACAAGTCCATCATCTCGTTCAAACACTTTACCTCGTTCAAATACTTCATCTGGTGCAAGCCCTCC
AGCTGATGCAAGCCCTCCAGCTGATGCAAGCCCTCCAGCTGATGCAAGCGATTCAGATGCTAAATCTTAC
GCTGATTTAAAACACAGAGTACGAAATTACTTGTTCACTATTAAAGAACTCAAATATCCCGAACTCTTTG
ATTTAACCAATCATATGTTAACTTTGTGTGATAATATTCATGGTTTCAAATATTTAATTGATGGATATGA
AGAAATTAATGAATTATTATATAAATTAAACTTTTATTTTGATTTATTAAGAGCAAAATTAAATGATGTA
TGTGCCAATAGTTATTGTCAAATACCTTTCAATCTTAAAATTCGTGCAAATGAATTAGACGTACTTAAAA
AACTTGTGTTCGGATATAGAAAACCATTAGACAATATTAAAGATAATGTAGGAAAAATGGAAGATTACAT
TAAAAAAAATAAAACAACCATAGCAAATATAAATGAATTAATTGAAGGAAGTAAGAAAACAATTGATCAA
AATAAGAATGCAGATAATGAAGAAGGAAAAAAAAAATTATACCAAGCTCAATATGATCTTTCTATTTACA
ATAAACAATTAGAAGAAGCACATAATTTAATAAGCGTTTTAGAAAAACGTATTGACACTTTAAAAAAAAA
TGAAAACATAAAGAAATTACTTGAAGATATAGATAAAATTAAAACAGATGCCGAAAAACTCACTACTGGA
AGTAAACCAAATACTCTCCTTGATAAGAACAAAAAAATCGAGGAACACGAAGAAAAAATAAAAGAAATTG
CCAAAACTATTAAATTTAACATTGATAGTTTATTTACTGATCCACTTGAATTAGAATATTATTTAAGAGA
AAAAAATAAAAAAGTTGATGTAACACCTAAATCACAAGATCCTACGAAATCTGTTCAAATACCAAAAGTT
CCTTATCCAAATGGTATTGTATATCCTTTACCACTCACTGATATTCATAATTCATTAGCTGCAGATAATG
ATAAAAATTCATATGGTGATTTAATGAATCCTGATACTAAAGAAAAAATTAATGAAAAAATTATTACAGA
TAATAAGGAAAGAAAAATATTCATTAATAACATTAAAAAACAAATTGATTTAGAAGAAAAAAACATTAAT
CACACAAAAGAACAAAATAAAAAATTACTTGAAGATTATGAAAAGTCAAAAAAGGATTATGAAGAATTAC
TTGAAAAATTTTATGAAATGAAATTTAATAATAATTTTAACAAAGATGTCGTAGATAAAATGTTCAGTGC
AAGATATACATATAATGTTGAAAAACAAAGATATAATAATAAATTTTCATCCTCTAATAATTCTGTATAT
AATGTTCAAAAATTAAAAAAGGCTCTTTCATATCTTGAAGATTATTCTTTAAGAAAAGGAATTTCTGAAA
AAGATTTTAATCATTATTATACTTTGAAAACTGGCCTCGAAGCTGATATAAAAAAATTAACAGAAGAAAT
AAAGAGTAGTGAAAACAAAATTCTAGAAAAAAATTTTAAAGGACTAACACATTCAGCAAATGCTTCCTTA
GAAGTATATGATATTGTAAAATTACAAGTACAAAAAGTTTTATTAATTAAAAAAATAGAAGACTTAAGAA
AGATAGAATTATTTTTAAAAAATGCACAACTAAAAGATAGTATTCATGTACCAAATATTTATAAACCACA
AAATAAACCAGAACCATATTATTTAATTGTATTAAAAAAAGAAGTAGATAAATTAAAAGAATTTATACCA
AAAGTAAAAGACATGTTAAAGAAAGAACAAGCTGTCTTATCAAGTATTACACAACCTTTAGTTGCAGCAA
GCGAAACAACTGAAGATGGGGGTCACTCCACACACACATTATCCCAATCAGGAGAAACAGAAGTAACAGA
AGAAACAGAAGAAACAGAAGAAACAGTAGGACACACAACAACGGTAACAATAACATTACCACCAACACAA
CCATCACCACCAAAAGAAGTAAAAGTTGTTGAAAATTCAATAGAACATAAGAGTAATGACAATTCACAAG
CCTTGACAAAAACAGTTTATCTAAAGAAATTAGATGAATTTTTAACTAAATCATATATATGTCATAAATA
TATTTTAGTATCAAACTCTAGTATGGACCAAAAATTATTAGAGGTATATAATCTTACTCCAGAAGAAAAA
AATGAATTAAAATCATGTGATCCATTAGATTTATTATTTAATATTCAAAATAACATACCTGCTATGTATT
CATTATATGATAGTATGAACAATGATTTACAACATCTCTTTTTTGAATTATATCAAAAGGAAATGATTTA
TTATTTACATAAACTAAAAGAGGAAAATCACATCAAAAAATTATTAGAGGAGCAAAAACAAATAACTGGA
ACATCATCTACATCCAGTCCTGGAAATACAACCGTAAATACTGCTCAATCCGCAACTCACAGTAATTCCC
AAAACCAACAATCAAATGCATCCTCTACCAATACCCAAAATGGTGTAGCTGTATCATCTGGTCCTGCTGT
AGTTGAAGAAAGTCATGATCCCTTAACAGTATTGTCTATTAGTAACGATTTGAAAGGTATTGTTAGTCTC
TTAAATCTTGGAAATAAAACTAAAGTACCTAATCCATTAACCATTTCTACAACAGAGATGGAAAAATTTT
ATGAGAATATTTTAAAAAATAATGATACCTATTTTAATGATGATATCAAACAATTCGTAAAATCTAATTC
AAAAGTAATTACAGGTTTGACCGAAACACAAAAAAATGCATTAAATGATGAAATTAAAAAATTAAAAGAT
ACTTTACAGTTATCATTTGATTTATATAATAAATATAAATTAAAATTAGATAGATTATTTAATAAGAAAA
AAGAACTTGGCCAAGACAAAATGCAAATTAAAAAACTTACTTTATTAAAAGAACAATTAGAATCAAAATT
GAATTCACTTAATAACCCACATAATGTATTACAAAACTTTTCTGTTTTCTTTAACAAAAAAAAAGAAGCT
GAAATAGCAGAAACTGAAAACACATTAGAAAACACAAAAATATTATTGAAACATTATAAAGGACTTGTTA
AATATTATAATGGTGAATCATCTCCATTAAAAACTTTAAGTGAAGTATCAATTCAAACAGAAGATAATTA
TGCCAATTTAGAAAAATTTAGAGTATTAAGTAAAATAGATGGAAAACTCAATGATAATTTACATTTAGGA
AAGAAAAAATTATCTTTCTTATCAAGTGGATTACATCATTTAATTACTGAATTAAAAGAAGTAATAAAAA
ATAAAAATTATACAGGTAATTCTCCAAGTGAAAATAATAAGAAAGTTAACGAAGCTTTAAAATCTTACGA
AAATTTTCTCCCAGAAGCAAAAGTTACAACAGTTGTAACTCCACCTCAACCAGATGTAACTCCATCTCCA
TTATCTGTAAGGGTAAGTGGTAGTTCAGGATCCACAAAAGAAGAAACACAAATACCAACTTCAGGCTCTT
TATTAACAGAATTACAACAAGTAGTACAATTACAAAATTATGACGAAGAAGATGATTCCTTAGTTGTATT
ACCCATTTTTGGAGAATCCGAAGATAATGACGAATATTTAGATCAAGTAGTAACTGGAGAAGCAATATCT
GTCACAATGGATAATATCCTCTCAGGATTTGAAAATGAATATGATGTTATATATTTAAAACCTTTAGCTG
GAGTATATAGAAGCTTAAAAAAACAAATTGAAAAAAACATTTTTACATTTAATTTAAATTTGAACGATAT
CTTAAATTCACGTCTTAAGAAACGAAAATATTTCTTAGATGTATTAGAATCTGATTTAATGCAATTTAAA
CATATATCCTCAAATGAATACATTATTGAAGATTCATTTAAATTATTGAATTCAGAACAAAAAAACACAC
TTTTAAAAAGTTACAAATATATAAAAGAATCAGTAGAAAATGATATTAAATTTGCACAGGAAGGTATAAG
TTATTATGAAAAGGTTTTAGCGAAATATAAGGATGATTTAGAATCAATTAAAAAAGTTATCAAAGAAGAA
AAGGAGAAGTTCCCATCATCACCACCAACAACACCTCCGTCACCAGCAAAAACAGACGAACAAAAGAAGG
AAAGTAAGTTCCTTCCATTTTTAACAAACATTGAGACCTTATACAATAACTTAGTTAATAAAATTGACGA
TTACTTAATTAACTTAAAGGCAAAGATTAACGATTGTAATGTTGAAAAAGATGAAGCACATGTTAAAATA
ACTAAACTTAGTGATTTAAAAGCAATTGATGACAAAATAGATCTTTTTAAAAACCATAACGACTTCGAAG
CAATTAAAAAATTGATAAATGATGATACGAAAAAAGATATGCTTGGCAAATTACTTAGTACAGGATTAGT
TCAAAATTTTCCTAATACAATAATATCAAAATTAATTGAAGGAAAATTCCAAGATATGTTAAACATTTCA
CAACACCAATGCGTAAAAAAACAATGTCCACAAAATTCTGGATGTTTCAGACATTTAGATGAAAGAGAAG
AATGTAAATGTTTATTAAATTACAAACAAGAAGGTGATAAATGTGTTGAAAATCCAAATCCTACTTGTAA
CGAAAATAATGGTGGATGTGATGCAGATGCCAAATGTACCGAAGAAGATTCAGGTAACAACGGAAAGAAA
ATCACATGTGAATGTACTAAACCTGATTCTTATCCACTTTTCGATGGTATTTTCTGCAGTTCCTCTAACT
TCTTAGGAATATCATTCTTATTAATACTCATGTTAATATTATACAGTTTCATTTAA

>AB502482.1 Plasmodium falciparum msp1 gene for merozoite surface protein-1, complete cds, isolate: Tz93-022
ATGAAGATCATATTCTTTTTATGTTCATTTCTTTTTTTTATTATAAATACACAATGTGTAACACATGAAA
GTTATCAAGAACTTGTCAAAAAACTAGAAGCTTTAGAAGATGCAGTATTGACAGGTTATAGTTTATTTCA
AAAGGAAAAAATGGTATTAAATGAAGAAGAAATTACTACAAAAGGTGCAAGTGCTCAAAGTGGTGCAAGT
GCTCAAAGTGGTACAAGTGGTACAAGTGGTACAAGTGGTACAAGTGGTCCAAGTGGTCCAAGTGGTACAA
GTCCATCATCTCGTTCAAACACTTTACCTCGTTCAAATACTTCATCTGGTGCAAGCCCTCCAGCTGATGC
AAGCGATTCAGATGCTAAATCTTACGCTGATTTAAAACACAGAGTACGAAATTACTTGTTCACTATTAAA
GAACTCAAATATCCCGAACTCTTTGATTTAACCAATCATATGTTAACTTTGTGTGATAATATTCATGGTT
TCAAATATTTAATTGATGGATATGAAGAAATTAATGAATTATTATATAAATTAAACTTTTATTTTGATTT
ATTAAGAGCAAAATTAAATGATGTATGTGCTAATGATTATTGTCAAATACCTTTCAATCTTAAAATTCGT
GCAAATGAATTAGACGTACTTAAAAAACTTGTGTTCGGATATAGAAAACCATTAGACAATATTAAAGATA
ATGTAGGAAAAATGGAAGATTACATTAAAAAAAATAAAACAACCATAGCAAATATAAATGAATTAATTGA
AGGAAGTAAGAAAACAATTGATCAAAATAAGAATGCAGATAATGAAGAAGGAAAAAAAAAATTATACCAA
GCTCAATATGATCTTTCTATTTACAATAAACAATTAGAAGAAGCACATAATTTAATAAGCGTTTTAGAAA
AACGTATTGACACTTTAAAAAAAAATGAAAACATAAAGAAATTACTTGAAGATATAGATAAAATTAAAAC
AGATGCCGAAAAACCCACTACTGGAAGTAAACCAAATACTCTCCTTGATAAGAACAAAAAAATCGAGGAA
CACGAAGAAAAAATAAAAGAAATTGCCAAAACTATTAAATTTAACATTGATAGTTTATTTACTGATCCAC
TTGAATTAGAATATTATTTAAGAGAAAAAAATAAAAAAGTTGATGTAACACCTAAATCACAAGATCCTAC
GAAATCTGTTCAAATACCAAAAGTTCCTTATCCAAATGGTATTGTATATCCTTTACCACTCACTGATATT
CATAATTCATTAGCTGCAGATAATGATAAAAATTCATATGGTGATTTAATGAATCCTGGTACTAAAGAAA
AAATTAATGAAAAAATTATTACAGATAATAAGGAAAGAAAAATATTCATTAATAACATTAAAAAACAAAT
TGATTTAGAAGAAAAAAACATTAATCACACAAAAGAACAAAATAAAAAATTACTTGAAGATTATGAAAAG
TCAAAAAAGGATTATGAAGAATTACTTGAAAAATTTTATGAAATGAAATTTAATAATAATTTTAACAAAG
ATGTCGTAGATAAAATGTTCAGTGCAAGATATACATATAATGTTGAAAAACAAAGATATAATAATAAATT
TTCATCCTCTAATAATTCTGTATATAATGTTCAAAAATTAAAAAAGGCTCTTTCATATCTTGAAGATTAT
TCTTTAAGAAAAGGAATTTCTGAAAAAGATTTTAATCATTATTATACTTTGAAAACTGGCCTCGAAGCTG
ATATAAAAAAATTAACAGAAGAAATAAAGAGTAGTGAAAACAAAATTCGAGAAAAAAATTTTAAAGGACT
AACACATTCAGCAAATGCTTCCTTAGAAGTATCTGATATTGTAAAATTACAAGTACAAAAAGTTTTATTA
ATTAAAAAAATAGAAGACTTAAGAAAGATAGAATTATTTTTAAAAAATGCACAACTAAAAGATAGTATTC
ATGTACCAAATATTTATAAACCACAAAATAAACCAGAACCATATTATTTAATTGTATTAAAAAAAGAAGT
AGATAAATTAAAAGAATTTATACCAAAAGTAAAAGACATGTTAAAGAAAGAACAAGCTGTCTTATCAAGT
ATTACACAACCTTTAGTTGCAGCAAGCGAAACAACTGAAGATGGGGGTCACTCCACACACACATTATCCC
AATCAGGAGAAACAGAAGTAACAGAAGAAACAGAAGAAACAGAAGAAACAGTAGGACACACAACAACGGT
AACAATAACATTACCACCAACACAACCATCACCACCAAAAGAAGTAAAAGTTGTTGAAAATTCAATAGAA
CATAAGAGTAATGACAATTCACAAGCCTTGACAAAAACAGTTTATCTAAAGAAATTAGATGAATTTTTAA
CTAAATCATATATATGTCATAAATATATTTTAGTATCAAACTCTAGTATGGACCAAAAATTATTAGAGGT
ATATAATCTTACTCCAGAAGAAAAAAATGAATTAAAATCATGTGATCCATTAGATTTATTATTTAATATT
CAAAATAACATACCTGCTATGTATTCATTATATGATAGTATGAACAATGATTTACAACATCTCTTTTTTG
AATTATATCAAAAGGAAATGATTTATTATTTACATAAACTAAAAGAGGAAAATCACATCAAAAAATTATT
AGAGGAGCAAAAACAAATAACTGGAACATCATCTACATCCAGTCCTGGAAATACAACCGTAAATACTGCT
CAATCCGCAACTCACAGTAATTCCCAAAACCAACAATCAAATGCATCCTCTACCAATACCCAAAATGGTG
TAGCTGTATCATCTGGTCCTGCTGTAGTTGAAGAAAGTCATGATCCCTTAACAGTATTGTCTATTAGTAA
CGATTTGAAAGGTATTGTTAGTCTCTTAAATCTTGGAAATAAAACTAAAGTACCTAATCCATTAACCATT
TCTACAACAGAGATGGAAAAATTTTATGAGAATATTTTAAAAAATAATGATACCTATTTTAATGATGATA
TCAAACAATTCGTAAAATCTAATTCAAAAGTAATTACAGGTTTGACCGAAACACAAAAAAATGCATTAAA
TGATGAAATTAAAAAATTAAAAGATACTTTACAGTTATCATTTGATTTATATAATAAATATAAATTAAAA
TTAGATAGATTATTTAATAAGAAAAAAGAACTTGGCCAAGACAAAATGCAAATTAAAAAACTTACTTTAT
TAAAAGAACAATTAGAATCAAAATTGAATTCACTTAATAACCCACATAATGTATTACAAAACTTTTCTGT
TTTCTTTAACAAAAAAAAAGAAGCTGAAATAGCAGAAACTGAAAACACATTAGAAAACACAAAAATATTA
TTGAAACATTATAAAGGACTTGTTAAATATTATAATGGTGAATCATCTCCATTAAAAACTTTAAGTGAAG
TATCAATTCAAACAGAAGATAATTATGCCAATTTAGAAAAATTTAGAGTATTAAGTAAAATAGATGGAAA
ACTCAATGATAATTTACATTTAGGAAAGAAAAAATTATCTTTCTTATCAAGTGGATTACATCATTTAATT
ACTGAATTAAAAGAAGTAATAAAAAATAAAAATTATACAGGTAATTCTCCAAGTGAAAATAATAAGAAAG
TTAACGAAGCTTTAAAATCTTACGAAAATTTTCTCCCAGAAGCAAAAGTTACAACAGTTGTAACTCCACC
TCAACCAGATGTAACTCCATCTCCATTATCTGTAAGGGTAAGTGGTAGTTCAGGATCCACAAAAGAAGAA
ACACAAATACCAACTTCAGGCTCTTTATTAACAGAATTACAACAAGTAGTACAATCACAAAATTATGACG
AAGAAGATGATTCCTTAGTTGTATTACCCATTTTTGGAGAATCCGAAGATAATGACGAATATTTAGATCA
AGTAGTAACTGGAGAAGCAATATCTGTCACAATGGATAATATCCTCTCAGGATTTGAAAATGAATATGAT
GTTATATATTTAAAACCTTTAGCTGGAGTATATAGAAGCTTAAAAAAACAAATTGAAAAAAACATTTTTA
CATTTAATTTAAATTTGAACGATATCTTAAATTCACGTCTTAAGAAACGAAAATATTTCTTAGATGTATT
AGAATCTGATTTAATGCAATTTAAACATATATCCTCAAATGAATACATTATTGAAGATTCATTTAAATTA
TTGAATTCAGAACAAAAAAACACACTTTTAAAAAGTTACAAATATATAAAAGAATCAGTAGAAAATGATA
TTAAATTTGCACAGGAAGGTATAAGTTATTATGAAAAGGTTTTAGCGAAATATAAGGATGATTTAGAATC
AATTAAAAAAGTTATCAAAGAAGAAAAGGAGAAGTTCCCATCATCACCACCAACAACACCTCCGTCACCA
GCAAAAACAGACGAACAAAAGAAGGAAAGTAAGTACCTTCCATTTTTAACAAACATTGAGACCTTATACA
ATAACTTAGTTAATAAAATTGACGATTACTTAATTAACTTAAAGGCAAAGATTAACGATTGTAATGTTGA
AAAAAATGAAGCACATGTTAAAATAACTAAACTTAGTGATTTAAAAGCAATTGATGACAAAATAGATCTT
TTTAAAAACCATAACGACTTCGAAGCAATTAAAAAATTGATAAATGATGATACGAAAAAAGATATGCTTG
GCAAATTACTTAGTACAGGATTAGTTCAAAATTTTCCTAATACAATAATATCAAAATTAATTGAAGGAAA
ATTCCAAGATATGTTAAACATTTCACAACACCAATGCGTAAAAAAACAATGTCCAGAAAATTCTGGATGT
TTCAGACATTTAGATGAAAGAGAAGAATGTAAATGTTTATTAAATTACAAACAAGAAGGTGATAAATGTG
TTGAAAATCCAAATCCTACTTGTAACGAAAATAATGGTGGATGTGATGCAGATGCCAAATGTACCGAAGA
AGATTCAGGTAGCAACGGAAAGAAAATCACATGTGAATGTACTAAACCTGATTCTTATCCACTTTTCGAT
GGTATTTTCTGCAGTTCCTCTAACTTCTTAGGAATATCATTCTTATTAATACTCATGTTAATATTATACA
GTTTCATTTAA

>AB502483.1 Plasmodium falciparum msp1 gene for merozoite surface protein-1, complete cds, isolate: Tz93-023
ATGAAGATCATATTCTTTTTATGTTCATTTCTGTTTTTTATTATAAATACACAATGTGTAACACATGAAA
GTTATCAAGAACTTGTCAAAAAACTAGAAGCTTTAGAAGATGCAGTATTGACAGGTTATGGTTTATTTCA
TAAGGAAAAAATGATCTTAAATGAAGGAACAAGTGGAACAGCTGTTACAACTAGTACACCTGGTTCAGGT
GGTTCAGTTACTTCAGGTGGTTCAGGTGGTTCAGTTGCTTCAGGTGGTTCAGGTGGCTCAGTTGCTTCAG
GTGGTTCAGGTGGCTCAGTTGCTTCAGGTGGCTCAGTTGCTTCAGGTGGTTCAGGTAATTCAAGACGTAC
AAATCCTTCAGATAATTCAAGTGATTCAGATGCTAAATCTTACGCTGATTTAAAACATAGAGTTCAAAAT
TACTTGTTCACTATTAAAGAACTCAAATATCCCGAACTCTTTGATTTAACCAATCATATGTTAACTTTGT
GTGATAATATTCATGGTTTCAAATATTTAATTGATGGATATGAAGAAATTAATGAATTATTATATAAATT
AAACTTTTATTTTGATTTATTAAGAGCAAAATTAAATGATGTATGTGCTAATGATTATTGTCAAATACCT
TTCAATCTTAAAATTCGTGCAAATGAATTAGACGTACTTAAAAAACTTGTGTTCGGATATAGAAAACCAT
TAGACAATATTAAAGATAATGTAGGAAAAATGGAAGATTACATTAAAAAAAATAAAACAACCATAGCAAA
TATAAATGAATTAATTGAAGGAAGTAAGAAAACAATTGATCAAAATAAGAATGCAGATAATGAAGAAGGA
AAAAAAAAATTATACCAAGCTCAATATGATCTTTCTATTTACAATAAACAATTAGAAGAAGCACATAATT
TAATAAGCGTTTTAGAAAAACGTATTGACACTTTAAAAAAAAATGAAAACATAAAGAAATTACTTGAAGA
TATAGATAAAATTAAAACAGATGCCGAAAAACCCACTACTGGAAGTAAACCAAATACTCTCCTTGATAAG
AACAAAAAAATCGAGGAACACGAAGAAAAAATAAAAGAAATTGCCAAAACTATTAAATTTAACATTGATA
GTTTATTTACTGATCCACTTGAATTAGAATATTATTTAAGAGAAAAAAATAAAAAAGTTGATGTAACACC
TAAATCACAAGATCCTACGAAATCTGTTCAAATACCAAAAGTTCCTTATCCAAATGGTATTGTATATCCT
TTACCACTCACTGATATTCATAATTCATTAGCTGCAGATAATGATAAAAATTCATATGGTGATTTAATGA
ATCCTGATACTAAAGAAAAAATTAATGAAAAAATTATTACAGATAATAAGGAAAGAAAAATATTCATTAA
TAACATTAAAAAACAAATTGATTTAGAAGAAAAAAAAATTAATCACACAAAAGAACAAAATAAAAAATTA
CTTGAAGATTATGAAAAGTCAAAAAAGGATTATGAAGAATTACTTGAAAAATTTTATGAAATGAAATTTA
ATAATAATTTTAACAAAGATGTCGTAGATAAAATATTCAGTGCAAGATATACATATAATGTTGAAAAACA
AAGATATAATAATAAATTTTCATCCTCTAATAATTCTGTATATAATGTTCAAAAATTAAAAAAGGCTCTT
TCATATCTTGAAGATTATTCTTTAAGAAAAGGAATTTCTGAAAAAGATTTTAATCATTATTATACTTTGA
AAACTGGCCTCGAAGCTGATATAAAAAAATTAACAGAAGAAATAAAGAGTAGTGAAAACAAAATTCTAGA
AAAAAATTTTAAAGGACTAACACATTCAGCAAATGCTTCCTTAGAAGTATCTGATATTGTAAAATTACAA
GTACAAAAAGTTTTATTAATTAAAAAAATAGAAGACTTAAGAAAGATAGAATTATTTTTAAAAAATGCAC
AACTAAAAGATAGTATTCATGTACCAAATATTTATAAACCACAAAATAAACCAGAACCATATTATTTAAT
TGTATTAAAAAAAGAAGTAGATAAATTAAAAGAATTTATACCAAAAGTAAAAGACATGTTAAAGAAAGAA
CAAGCTGTCTTATCAAGTATTACACAACCTTTAGTTGCAGCAAGCGAAACAACTGAAGATGGGGGTCACT
CCACACACACATTATCCCAATCAGGAGAAACAGAAGTAACAGAAGAAACAGAAGAAACAGAAGAAACAGT
AGGACACACAACAACGGTAACAATAACATTACCACCAACACAACCATCACCACCAAAAGAAGTAAAAGTT
GTTGAAAATTCAATAGAACATAAGAGTAATGACAATTCACAAGCCTTGACAAAAACAGTTTATCTAAAGA
AATTAGATGAATTTTTAACTAAATCATATATATGTCATAAATATATTTTAGTATCAAACTCTAGTATGGA
CCAAAAATTATTAGAGGTATATAATCTTACTCCAGAAGAAGAAAATGAATTAAAATCATGTGATCCATTA
GATTTATTATTTAATATTCAAAATAACATACCTGCTATGTATTCATTATATGATAGTATGAACAATGATT
TACAACATCTCTTTTTTGAATTATATCAAAAGGAAATGATTTATTATTTACATAAACTAAAAGAGGAAAA
TCACATCAAAAAATTATTAGAGGAGCAAAAACAAATAACTGGAACATCATCTACATCCAGTCCTGGAAAT
ACAACCGTAAATACTGCTCAATCCGCAACTCACAGTAATTCCCAAAACCAACAATCAAATGCATCCTCTA
CCAATACCCAAAATGGTGTAGCTGTATCATCTGGTCCTGCTGTAGTTGAAGAAAGTCATGATCCCTTAAC
AGTATTGTCTATTAGTAACGATTTGAAAGGTATTGTTAGTCTCTTAAATCTTGGAAATAAAACTAAAGTA
CCTAATCCATTAACCATTTCTACAACAGAGATGGAAAAATTTTATGAGAATATTTTAAAAAATAATGATA
CCTATTTTAATGATGATATCAAACAATTCGTAAAATCTAATTCAAAAGTAATTACAGGTTTGACCGAAAC
ACAAAAAAATGCATTAAATGATGAAATTAAAAAATTAAAAGATACTTTACAGTTATCATTTGATTTATAT
AATAAATATAAATTAAAATTAGATAGATTATTTAATAAGAAAAAAGAACTTGGCCAAGACAAAATGCAAA
TTAAAAAACTTACTTTATTAAAAGAACAATTAGAATCAAAATTGAATTCACTTAATAACCCACATAATGT
ATTACAAAACTTTTCTGTTTTCTTTAACAAAAAAAAAGAAGCTGAAATAGCAGAAACTGAAAACACATTA
GAAAACACAAAAATATTATTGAAACATTATAAAGGACTTGTTAAATATTATAATGGTGAATCATCTCCAT
TAAAAACTTTAAGTGAAGTATCAATTCAAACAGAAGATAATTATGCCAATTTAGAAAAATTTAGAGTATT
AAGTAAAATAGATGGAAAACTCAATGATAATTTACATTTAGGAAAGAAAAAATTATCTTTCTTATCAAGT
GGATTACATCATTTAATTACTGAATTAAAAGAAGTAATAAAAAATAAAAATTATACAGGTAATTCTCCAA
GTGAAAATAATAAGAAAGTTAACGAAGCTTTAAAATCTTACGAAAATTTTCTCCCAGAAGCAAAAGTTAC
AACAGTTGTAACTCCACCTCAACCAGATGTAACTCCATCTCCATTATCTGTAAGGGTAAGTGGTAGTTCA
GGATCCACAAAAGAAGAAACACAAATACCAACTTCAGGCTCTTTATTAACAGAATTACAACAAGTAGTAC
AATTACAAAATTATGACGAAGAAGATGATTCCTTAGTTGTATTACCCATTTTTGGAGAATCCGAAGATAA
TGACGAATATTTAGATCAAGTAGTAACTGGAGAAGCAATATCTGTCACAATGGATAATATCCTCTCAGGA
TTTGAAAATGAATATGATGTTATATATTTAAAACCTTTAGCTGGAGTATATAGAAGCTTAAAAAAACAAA
TTGAAAAAAACATTTTTACATTTAATTTAAATTTGAACGATATCTTAAATTCACGTCTTAAGAAACGAAA
ATATTTCTTAGATGTATTAGAATCTGATTTAATGCAATTTAAACATATATCCTCAAATGAATACATTATT
GAAGATTCATTTAAATTATTGAATTCAGAACAAAAAAACACACTTTTAAAAAGTTACAAATATATAAAAG
AATCAGTAGAAAATGATATTAAATTTGCACAGGAAGGTATAAGTTATTATGAAAAGGTTTTAGCGAAATA
TAAGGATGATTTAGAATCAATTAAAAAAGTTATCAAAGAAGAAAAGGAGAAGTTCCCATCATCACCACCA
ACAACACCTCCGTCACCAGCAAAAACAGACGAACAAAAGAAGGAAAGTAAGTACCTTCCATTTTTAACAA
ACATTGAGACCTTATACAATAACTTAGTTAATAAAATTGACGATTACTTAATTAACTTAAAGGCAAAGAT
TAACGATTGTAATGTTGAAAAAAATGAAGCACATGTTAAAATAACTAAACTTAGTGATTTAAAAGCAATT
GATGACAAAATAGATCTTTTTAAAAACCATAACGACTTCGAAGCAATTAAAAAATTGATAAATGATGATA
CGAAAAAAGATATGCTTGGCAAATTACTTAGTACAGGATTAGTTCAAAATTTTCCTAATACAATAATATC
AAAATTAATTGAAGGAAAATTCCAAGATATGTTAAACATTTCACAACACCAATGCGTAAAAAAACAATGT
CCAGAAAATTCTGGATGTTTCAGACATTTAGATGAAAGAGAAGAATGTAAATGTTTATTAAATTACAAAC
AAGAAGGTGATAAATGTGTTGAAAATCCAAATCCTACTTGTAACGAAAATAATGGTGGATGTGATGCAGA
TGCCAAATGTACCGAAGAAGATTCAGGTAGCAACGGAAAGAAAATCACATGTGAATGTACTAAACCTGAT
TCTTATCCACTTTTCGATGGTATTTTCTGCAGTTCCTCTAACTTCTTAGGAATATCATTCTTATTAATAC
TCATGTTAATATTATACAGTTTCATTTAA

>AB502484.1 Plasmodium falciparum msp1 gene for merozoite surface protein-1, complete cds, isolate: Tz93-028
ATGAAGATCATATTCTTTTTATGTTCATTTCTTTTTTTTATTATAAATACACAATGTGTAACACATGAAA
GTTATCAAGAACTTGTCAAAAAACTAGAAGCTTTAGAAGATGCAGTATTGACAGGTTATGGTTTATTTCA
TAAGGAAAAAATGATCTTAAATGAAGAAGAAATTACTACAAAAGGTGCAAGTGCTCAAAGTGGTACAAGT
GGTACAAGTGGTACAAGTGGTACAAGTGGTCCAAGTGGTACAAGTGGTCCAAGTGGTACAAGTCCATCAT
CTCGTTCAAACACTTTACCTCGTTCAAATACTTCATCTGGTGCAAGCCCTCCAGCTGATGCAAGCGATTC
AGATGCTAAATCTTACGCTGATTTAAAACACAGAGTACGAAATTACTTGTTCACTATTAAAGAACTCAAA
TATCCCGAACTCTTTGATTTAACCAATCATATGTTAACTTTGTGTGATAATATTCATGGTTTCAAATATT
TAATTGATGGATATGAAGAAATTAATGAATTATTATATAAATTAAACTTTTATTTTGATTTATTAAGAGC
AAAATTAAATGATGTATGTGCTAATGATTATTGTCAAATACCTTTCAATCTTAAAATTCGTGCAAATGAA
TTAGACGTACTTAAAAAACTTGTGTTCGGATATAGAAAACCATTAGACAATATTAAAGATAATGTAGGAA
AAATGGAAGATTACATTAAAAAAAATAAAACAACCATAGCAAATATAAATGAATTAATTGAAGGAAGTAA
GAAAACAATTGATCAAAATAAGAATGCAGATAATGAAGAAGGAAAAAAAAAATTATACCAAGCTCAATAT
GATCTTTCTATTTACAATAAACAATTAGAAGAAGCACATAATTTAATAAGCGTTTTAGAAAAACGTATTG
ACACTTTAAAAAAAAATGAAAACATAAAGAAATTACTTGAAGATATAGATAAAATTAAAACAGATGCCGA
AAAACTCACTACTGGAAGTAAACCAAATCCTCTCCCTGAGAATAAGAAAAAAGAAGTCGAGGGACACGAA
GAAAAAATAAAAGAAATTGCCAAAACTATTAAATTTAACATTGATAGTTTATTTACTGATCCACTTGAAT
TAGAATATTATTTAAGAGAAAAAAATAAAAAAGTTGATGTAACACCTAAATCACAAGATCCTACGAAATC
TGTTCAAATACCAAAAGTTCCTTATCCAAATGGTATTGTATATCCTTTACCACTCACTGATATTCATAAT
TCATTAGCTGCAGATAATGATAAAAATTCATATGGTGATTTAATGAATCCTGATACTAAAGAAAAAATTA
ATGAAAAAATTATTACAGATAATAAGGAAAGAAAAATATTCATTAATAACATTAAAAAACAAATTGATTT
AGAAGAAAAAAACATTAATCACACAAAAGAACAAAATAAAAAATTACTTGAAGATTATGAAAAGTCAAAA
AAGGATTATGAAGAATTACTTGAAAAATTTTATGAAATGAAATTTAATAATAATTTTAACAAAGATGTCG
TAGATAAAATGTTCAGTGCAAGATATACATATAATGTTGAAAAACAAAGATATAATAATAAATTTTCATC
CTCTAATAATTCTGTATATAATGTTCAAAAATTAAAAAAGGCTCTTTCATATCTTGAAGATTATTCTTTA
AGAAAAGGAATTTCTGAAAAAGATTTTAATCATTATTATACTTTGAAAACTGGCCTCGAAGCTGATATAA
AAAAATTAACAGAAGAAATAAAGAGTAGTGAAAACAAAATTCGAGAAAAAAATTTTAAAGGACTAACACA
TTCAGCAAATGCTTCCTTAGAAGTATATGATATTGTAAAATTACAAGTACAAAAAGTTTTATTAATTAAA
AAAATAGAAGACTTAAGAAAGATAGAATTATTTTTAAAAAATGCACAACTAAAAGATAGTATTCATGTAC
CAAATATTTATAAACCACAAAATAAACCAGAACCATATTATTTAATTGTATTAAAAAAAGAAGTAGATAA
ATTAAAAGAATTTATACCAAAAGTAAAAGACATGTTAAAGAAAGAACAAGCTGTCTTATCAAGTATTACA
CAACCTTTAGTTGCAGCAAGCGAAACAACTGAAGATGGGGGTCACTCCACACACACATTATCCCAATCAG
GAGAAACAGAAGTAACAGAAGAAACAGAAGAAACAGAAGAAACAGTAGGACACACAACAACGGTAACAAT
AACATTACCACCAACACAACCATCACCACCAAAAGAAGTAAAAGTTGTTGAAAATTCAATAGAACATAAG
AGTAATGACAATTCACAAGCCTTGACAAAAACAGTTTATCTAAAGAAATTAGATGAATTTTTAACTAAAT
CATATATATGTCATAAATATATTTTAGTATCAAACTCTAGTATGGACCAAAAATTATTAGAGGTATATAA
TCTTACTCCAGAAGAAAAAAATGAATTAAAATCATGTGATCCATTAGATTTATTATTTAATATTCAAAAT
AACATACCTGCTATGTATTCATTATATGATAGTATGAACAATGATTTACAACATCTCTTTTTTGAATTAT
ATCAAAAGGAAATGATTTATTATTTACATAAACTAAAAGAGGAAAATCACATCAAAAAATTATTAGAGGA
GCAAAAACAAATAACTGGAACATCATCTACATCCAGTCCTGGAAATACAACCGTAAATACTGCTCAATCC
GCAACTCACAGTAATTCCCAAAACCAACAATCAAATGCATCCTCTACCAATACCCAAAATGGTGTAGCTG
TATCATCTGGTCCTGCTGTAGTTGAAGAAAGTCATGATCCCTTAACAGTATTGTCTATTAGTAACGATTT
GAAAGGTATTGTTAGTCTCTTAAATCTTGGAAATAAAACTAAAGTACCTAATCCATTAACCATTTCTACA
ACAGAGATGGAAAAATTTTATGAGAATATTTTAAAAAATAATGATACCTATTTTAATGATGATATCAAAC
AATTCGTAAAATCTAATTCAAAAGTAATTACAGGTTTGACCGAAACACAAAAAAATGCATTAAATGATGA
AATTAAAAAATTAAAAGATACTTTACAGTTATCATTTGATTTATATAATAAATATAAATTAAAATTAGAT
AGATTATTTAATAAGAAAAAAGAACTTGGCCAAGACAAAATGCAAATTAAAAAACTTACTTTATTAAAAG
AACAATTAGAATCAAAATTGAATTCACTTAATAACCCACATAATGTATTACAAAACTTTTCTGTTTTCTT
TAACAAAAAAAAAGAAGCTGAAATAGCAGAAACTGAAAACACATTAGAAAACACAAAAATATTATTGAAA
CATTATAAAGGACTTGTTAAATATTATAATGGTGAATCATCTCCATTAAAAACTTTAAGTGAAGTATCAA
TTCAAACAGAAGATAATTATGCCAATTTAGAAAAATTTAGAGTATTAAGTAAAATAGATGGAAAACTCAA
TGATAATTTACATTTAGGAAAGAAAAAATTATCTTTCTTATCAAGTGGATTACATCATTTAATTACTGAA
TTAAAAGAAGTAATAAAAAATAAAAATTATACAGGTAATTCTCCAAGTGAAAATAATAAGAAAGTTAACG
AAGCTTTAAAATCTTACGAAAATTTTCTCCCAGAAGCAAAAGTTACAACAGTTGTAACTCCACCTCAACC
AGATGTAACTCCATCTCCATTATCTGTAAGGGTAAGTGGTAGTTCAGGATCCACAAAAGAAGAAACACAA
ATACCAACTTCAGGCTCTTTATTAACAGAATTACAACAAGTAGTACAATTACAAAATTATGACGAAGAAG
ATGATTCCTTAGTTGTATTACCCATTTTTGGAGAATCCGAAGATAATGACGAATATTTAGATCAAGTAGT
AACTGGAGAAGCAATATCTGTCACAATGGATAATATCCTCTCAGGATTTGAAAATGAATATGATGTTATA
TATTTAAAACCTTTAGCTGGAGTATATAGAAGCTTAAAAAAACAAATTGAAAAAAACATTTTTACATTTA
ATTTAAATTTGAACGATATCTTAAATTCACGTCTTAAGAAACGAAAATATTTCTTAGATGTATTAGAATC
TGATTTAATGCAATTTAAACATATATCCTCAAATGAATACATTATTGAAGATTCATTTAAATTATTGAAT
TCAGAACAAAAAAACACACTTTTAAAAAGTTACAAATATATAAAAGAATCAGTAGAAAATGATATTAAAT
TTGCACAGGAAGGTATAAGTTATTATGAAAAGGTTTTAGCGAAATATAAGGATGATTTAGAATCAATTAA
AAAAGTTATCAAAGAAGAAAAGGAGAAGTTCCCATCATCACCACCAACAACACCTCCGTCACCAGCAAAA
ACAGACGAACAAAAGAAGGAAAGTAAGTTCCTTCCATTTTTAACAAACATTGAGACCTTATACAATAACT
TAGTTAATAAAATTGACGATTACTTAATTAACTTAAAGGCAAAGATTAACGATTGTAATGTTGAAAAAAA
TGAAGCACATGTTAAAATAACTAAACTTAGTGATTTAAAAGCAATTGATGACAAAATAGATCTTTTTAAA
AACCATAACGACTTCGAAGCAATTAAAAAATTGATAAATGATGATACGAAAAAAGATATGCTTGGCAAAT
TACTTAGTACAGGATTAGTTCAAAATTTTCCTAATACAATAATATCAAAATTAATTGAAGGAAAATTCCA
AGATATGTTAAACATTTCACAACACCAATGCGTAAAAAAACAATGTCCACAAAATTCTGGATGTTTCAGA
CATTTAGATGAAAGAGAAGAATGTAAATGTTTATTAAATTACAAACAAGAAGGTGATAAATGTGTTGAAA
ATCCAAATCCTACTTGTAACGAAAATAATGGTGGATGTGATGCAGATGCCAAATGTACCGAAGAAGATTC
AGGTAGCAGCGGAAAGAAAATCACATGTGAATGTACTAAACCTGATTCTTATCCACTTTTCGATGGTATT
TTCTGCAGTTCCTCTAACTTCTTAGGAATATCATTCTTATTAATACTCATGTTAATATTATACAGTTTCA
TTTAA

>AB502485.1 Plasmodium falciparum msp1 gene for merozoite surface protein-1, complete cds, isolate: Tz93-030
ATGAAGATCATATTCTTTTTATGTTCATTTCTTTTTTTTATTATAAATACACAATGTGTAACACATGAAA
GTTATCAAGAACTTGTCAAAAAACTAGAAGCTTTAGAAGATGCAGTATTGACAGGTTATGGTTTATTTCA
TAAGGAAAAAATGATCTTAAATGAAGAAGAAATTACTACAAAAGGTGCAAGTGCTCAAAGTGGTACAAGT
GGTACAAGTGGTACAAGTGGTACAAGTGGTACAAGTGGTACAAGTGGTACAAGTGGTACAAGTGGTACAA
GTGCTCAAAGTGGTACAAGTGGTACAAGTGGTACAAGTGCTCAAAGTGGTACAAGTGGTACAAGTGGTAC
AAGTGGTACAAGTGGTACAAGTGGTCCAAGTGGTCCAAGTGGTACAAGTCCATCATCTCGTTCAAACACT
TTACCTCGTTCAAATACTTCATCTGGTGCAAGCCCTCCAGCTGATGCAAGCGATTCAGATGCTAAATCTT
ACGCTGATTTAAAACACAGAGTACGAAATTACTTGTTCACTATTAAAGAACTCAAATATCCCGAACTCTT
TGATTTAACCAATCATATGTTAACTTTGTGTGATAATATTCATGGTTTCAAATATTTAATTGATGGATAT
GAAGAAATTAATGAATTATTATATAAATTAAACTTTTATTTTGATTTATTAAGAGCAAAATTAAATGATG
TATGTGCTAATGATTATTGTCAAATACCTTTCAATCTTAAAATTCGTGCAAATGAATTAGACGTACTTAA
AAAACTTGTGTTCGGATATAGAAAACCATTAGACAATATTAAAGATAATGTAGGAAAAATGGAAGATTAC
ATTAAAAAAAATAAAACAACCATAGCAAATATAAATGAATTAATTGAAGGAAGTAAGAAAACAATTGATC
AAAATAAGAATGCAGATAATGAAGAAGGAAAAAAAAAATTATACCAAGCTCAATATGATCTTTCTATTTA
CAATAAACAATTAGAAGAAGCACATAATTTAATAAGCGTTTTAGAAAAACGTATTGACACTTTAAAAAAA
AATGAAAACATAAAGAAATTACTTGAAGATATAGATAAAATTAAAACAGATGCCGAAAAACTCACTACTG
GAAGTAAACCAAATACTCTCCTTGATAAGAACAAAAAAATCGAGGAACACGAAGAAAAAATAAAAGAAAT
TGCCAAAACTATTAAATTTAACATTGATAGTTTATTTACTGATCCACTTGAATTAGAATATTATTTAAGA
GAAAAAAATAAAAAAGTTGATGTAACACCTAAATCACAAGATCCTACGAAATCTGTTCAAATACCAAAAG
TTCCTTATCCAAATGGTATTGTATATCCTTTACCACTCACTGATATTCATAATTCATTAGCTGCAGATAA
TGATAAAAATTCATATGGTGATTTAATGAATCCTGATACTAAAGAAAAAATTAATGAAAAAATTATTACA
GATAATAAGGAAAGAAAAATATTCATTAATAACATTAAAAAACAAATTGATTTAGAAGAAAAAAACATTA
ATCACACAAAAGAACAAAATAAAAAATTACTTGAAGATTATGAAAAGTCAAAAAAGGATTATGAAGAATT
ACTTGAAAAATTTTATGAAATGAAATTTAATAATAATTTTAACAAAGATGTCGTAGATAAAATGTTCAGT
GCAAGATATACATATAATGTTGAAAAACAAAGATATAATAATAAATTTTCATCCTCTAATAATTCTGTAT
ATAATGTTCAAAAATTAAAAAAGGCTCTTTCATATCTTGAAGATTATTCTTTAAGAAAAGGAATTTCTGA
AAAAGATTTTAATCATTATTATACTTTGAAAACTGGCCTCGAAGCTGATATAAAAAAATTAACAGAAGAA
ATAAAGAGTAGTGAAAACAAAATTCTAGAAAAAAATTTTAAAGGACTAACACATTCAGCAAATGCTTCCT
TAGAAGTATATGATATTGTAAAATTACAAGTACAAAAAGTTTTATTAATTAAAAAAATAGAAGACTTAAG
AAAGATAGAATTATTTTTAAAAAATGCACAACTAAAAGATAGTATTCATGTACCAAATATTTATAAACCA
CAAAATAAACCAGAACCATATTATTTAATTGTATTAAAAAAAGAAGTAGATAAATTAAAAGAATTTATAC
CAAAAGTAAAAGACATGTTAAAGAAAGAACAAGCTGTCTTATCAAGTATTACACAACCTTTAGTTGCAGC
AAGCGAAACAACTGAAGATGGGGGTCACTCCACACACACATTATCCCAATCAGGAGAAACAGAAGTAACA
GAAGAAACAGAAGAAACAGAAGAAACAGTAGGACACACAACAACGGTAACAATAACATTACCACCAAAAG
AAGTAAAAGTTGTTGAAAATTCAGTAGAACATAAGAGTAATGACAATTCACAAGCCTTGACAAAAACAGT
TTATCTAAAGAAATTAGATGAATTTTTAACTAAATCATATATATGTCATAAATATATTTTAGTATCAAAC
TCTAGTATGGACCAAAAATTATTAGAGGTATATAATCTTACTCCAGAAGAAGAAAATGAATTAAAATCAT
GTGATCCATTAGATTTATTATTTAATATTCAAAATAACATACCTGCTATGTATTCATTATATGATAGTAT
GAACAATGATTTACAACATCTCTTTTTTGAATTATATCAAAAGGAAATGATTTATTATTTACATAAACTA
AAAGAGGAAAATCACATCAAAAAATTATTAGAGGAGCAAAAACAAATAACTGGAACATCATCTACATCCA
GTCCTGGAAATACAACCGTAAATACTGCTCAATCCGCAACTCACAGTAATTCCCAAAACCAACAATCAAA
TGCATCCTCTACCAATACCCAAAATGGTGTAGCTGTATCATCTGGTCCTGCTGTAGTTGAAGAAAGTCAT
GATCCCTTAACAGTATTGTCTATTAGTAACGATTTGAAAGGTATTGTTAGTCTCTTAAATCTTGGAAATA
AAACTAAAGTACCTAATCCATTAACCATTTCTACAACAGAGATGGAAAAATTTTATGAGAATATTTTAAA
AAATAATGATACCTATTTTAATGATGATATCAAACAATTCGTAAAATCTAATTCAAAAGTAATTACAGGT
TTGACCGAAACACAAAAAAATGCATTAAATGATGAAATTAAAAAATTAAAAGATACTTTACAGTTATCAT
TTGATTTATATAATAAATATAAATTAAAATTAGATAGATTATTTAATAAGAAAAAAGAACTTGGCCAAGA
CAAAATGCAAATTAAAAAACTTACTTTATTAAAAGAACAATTAGAATCAAAATTGAATTCACTTAATAAC
CCACATAATGTATTACAAAACTTTTCTGTTTTCTTTAACAAAAAAAAAGAAGCTGAAATAGCAGAAACTG
AAAACACATTAGAAAACACAAAAATATTATTGAAACATTATAAAGGACTTGTTAAATATTATAATGGTGA
ATCATCTCCATTAAAAACTTTAAGTGAAGTATCAATTCAAACAGAAGATAATTATGCCAATTTAGAAAAA
TTTAGAGTATTAAGTAAAATAGATGGAAAACTCAATGATAATTTACATTTAGGAAAGAAAAAATTATCTT
TCTTATCAAGTGGATTACATCATTTAATTAATGAATTAAAAGAAGTAATAAAAAATAAAAATTATACAGG
TAATTCTCCAAGTGAAAATAATAAGAAAGTTAACGAAGCTTTAAAATCTTACGAAAATTTTCTCCCAGAA
GCAAAAGTTACAACAGTTGTAACTCCACCTCAACCAGATGTAACTCCATCTCCATTATCTGTAAGGGTAA
GTGGTAGTTCAGGATCCACAAAAGAAGAAACACAAATACCAACTTCAGGCTCTTTATTAACAGAATTACA
ACAAGTAGTACAATCACAAAATTATGACGAAGAAGATGATTCCTTAGTTGTATTACCCATTTTTGGAGAA
TCCGAAGATAATGACGAATATTTAGATCAAGTAGTAACTGGAGAAGCAATATCTGTCACAATGGATAATA
TCCTCTCAGGATTTGAAAATGAATATGATGTTATATATTTAAAACCTTTAGCTGGAGTATATAGAAGCTT
AAAAAAACAAATTGAAAAAAACATTTTTACATTTAATTTAAATTTGAACGATATCTTAAATTCACGTCTT
AAGAAACGAAAATATTTCTTAGATGTATTAGAATCTGATTTAATGCAATTTAAACATATATCCTCAAATG
AATACATTATTGAAGATTCATTTAAATTATTGAATTCAGAACAAAAAAACACACTTTTAAAAAGTTACAA
ATATATAAAAGAATCAGTAGAAAATGATATTAAATTTGCACAGGAAGGTATAAGTTATTATGAAAAGGTT
TTAGCGAAATATAAGGATGATTTAGAATCAATTAAAAAAGTTATCAAAGAAGAAAAGGAGAAGTTCCCAT
CATCACCACCAACAACACCTCCGTCACCAGCAAAAACAGACGAACAAAAGAAGGAAAGTAAGTTCCTTCC
ATTTTTAACAAACATTGAGACCTTATACAATAACTTAGTTAATAAAATTGACGATTACTTAATTAACTTA
AAGGCAAAGATTAACGATTGTAATGTTGAAAAAAATGAAGCACATGTTAAAATAACTAAACTTAGTGATT
TAAAAGCAATTGATGACAAAATAGATCTTTTTAAAAACCATAACGACTTCGAAGCAATTAAAAAATTGAT
AAATGATGATACGAAAAAAGATATGCTTGGCAAATTACTTAGTACAGGATTAGTTCAAAATTTTCCTAAT
ACAATAATATCAAAATTAATTGAAGGAAAATTCCAAGATATGTTAAACATTTCACAACACCAATGCGTAA
AAAAACAATGTCCAGAAAATTCTGGATGTTTCAGACATTTAGATGAAAGAGAAGAATGTAAATGTTTATT
AAATTACAAACAAGAAGGTGATAAATGTGTTGAAAATCCAAATCCTACTTGTAACGAAAATAATGGTGGA
TGTGATGCAGATGCCAAATGTACCGAAGAAGATTCAGGTAGCAACGGAAAGAAAATCACATGTGAATGTA
CTAAACCTGATTCTTATCCACTTTTCGATGGTATTTTCTGCAGTTCCTCTAACTTCTTAGGAATATCATT
CTTATTAATACTCATGTTAATATTATACAGTTTCATTTAA

>AB502486.1 Plasmodium falciparum msp1 gene for merozoite surface protein-1, complete cds, isolate: Tz93-031
ATGAAGATCATATTCTTTTTATGTTCATTTCTTTTTTTTATTATAAATACACAATGTGTAACACATGAAA
GTTATCAAGAACTTGTCAAAAAACTAGAAGCTTTAGAAGATGCAGTATTGACAGGTTATAGTTTATTTCA
AAAGGAAAAAATGGTATTAAAGGATGGAGCAAATACTCAAGTTGTTGCAAAGCCTGCAGATGCTGTAAGT
ACTCAAAGTGCTAAAAATCCTCCAGGTGCTACAGTACCTTCAGGTACTGCAAGTACTAAAGGTGCTATAA
GATCTCCAGGTGCTGCAAATCCTTCAGATGATTCAAGTGATTCAGATGCTAAATCTTACGCTGATTTAAA
ACACAGAGTACGAAATTACTTGTTCACTATTAAAGAACTCAAATATCCCGAACTCTTTGATTTAACCAAT
CATATGTTAACTTTGTGTGATAATATTCATGGTTTCAAATATTTAATTGATGGATATGAAGAAATTAATG
AATTATTATATAAATTAAACTTTTATTTTGATTTATTAAGAGCAAAATTAAATGATGTATGTGCTAATGA
TTATTGTCAAATACCTTTCAATCTTAAAATTCGTGCAAATGAATTAGACGTACTTAAAAAACTTGTGTTC
GGATATAGAAAACCATTAGACAATATTAAAGATAATGTAGGAAAAATGGAAGATTACATTAAAAAAAATA
AAACAACCATAGCAAATATAAATGAATTAATTGAAGGAAGTAAGAAAACAATTGATCAAAATAAGAATGC
AGATAATGAAGAAGGAAAAAAAAAATTATACCAAGCTCAATATGATCTTTTTATTTACAATAAACAATTA
CAAGAAGCACATAATTTAATAAGCGTTTTAGAAAAACGTATTGACACTTTAAAAAAAAATGAAAACATAA
AGAAATTACTTGAAGATATAGATAAAATTAAAACAGATTCCGAAAAACTCACTACTGGAAGTAAACCAAA
TACTCTCCTTGATAAGAACAAAAAAATCGAGGAACACGAAGAAAAAATAAAAGAAATTGCCAAAACTATT
AAATTTAACATTGATAGTTTATTTACTGATCCACTTGAATTAGAATATTATTTAAGAGAAAAAAATAAAA
AAGTTGATGTAACACCTAAATCACAAGATCCTACGAAATCTGTTCAAATACCAAAAGTTCCTTATCCAAA
TGGTATTGTATATCCTTTACCACTCACTGATATTCATAATTCATTAGCTGCAGATAATGATAAAAATTCA
TATGGTGATTTAATGAATCCTGGTACTAAAGAAAAAATTAATGAAAAAATTATTACAGATAATAAGGAAA
GAAAAATATTCATTAATAACATTAAAAAACAAATTGATTTAGAAGAAAAAAACATTAATCACACAAAAGA
ACAAAATAAAAAATTACTTGAAGATTATGAAAAGTCAAAAAAGGATTATGAAGAATTACTTGAAAAATTT
TATGAAATGAAATTTAATAATAATTTTGACAAAGATGTCGTAGATAAAATATTCAGAGCAAGATATACAT
ATAATGTTGAAAAACAAACATATAATAATAAATTTTCATCCTCTAATAATTCTGTATATAATGTTCAAAA
ATTAAAAAAGGCTCTTTCATATCTTGAAGATTATTCTTTAAGAAAAGGAATTTCTGAAAAAGATTTTAAT
CATTATTATACTTTGAAAACTGGCCTCGAAGCTGATATAAAAAAATTAACAGAAGAAATAAAGAGTAGTG
AAAACAAAATTCTAGAAAAAAATTTTAAAGGACTAACACATTCAGCAAATGCTTCCTTAGAAGTATATGA
TATTGTAAAATTACAAGTACAAAAAGTTTTATTAATTAAAAAAATAGAAGACTTAAGAAAGATAGAATTA
TTTTTAAAAAATGCACAACTAAAAGATAGTATTCATGTACCAAATATTTATAAACCACAAAATAAACCAG
AACCATATTATTTAATTGTATTAAAAAAAGAAGTAGATAAATTAAAAGAATTTATACCAAAAGTAAAAGA
CATGTTAAAGAAAGAACAAGCTGTCTTATCAAGTATTACACAACCTTTAGTTGCAGCAAGCGAAACAACT
GAAGATGGGGGTCACTCCACACACACATTATCCCAATCAGGAGAAACAGAAGTAACAGAAGAAACAGAAG
AAACAGAAGAAACAGTAGGACACACAACAACGGTAACAATAACATTACCACCAAAAGAAGTAAAAGTTGT
TGAAAATTCAATAGAACATAAGAGTAATGACAATTCACAAGCCTTGACAAAAACAGTTTATCTAAAGAAA
TTAGATGAATTTTTAACTAAATCATATATATGTCATAAATATATTTTAGTATCAAACTCTAGTATGGACC
AAAAATTATTAGAGGTATATAATCTTACTCCAGAAGAAAAAAATGAATTAAAATCATGTGATCCATTAGA
TTTATTATTTAATATTCAAAATAACATACCTGCTATGTATTCATTATATGATAGTATGAACAATGATTTA
CAACATCTCTTTTTTGAATTATATCAAAAGGAAATGATTTATTATTTACATAAACTAAAAGAGGAAAATC
ACATCAAAAAATTATTAGAGGAGCAAAAACAAATAACTGGAACATCATCTACATCCAGTCCTGGAAATAC
AACCGTAAATACTGCTCAATCCGCAACTCACAGTAATTCCCAAAACCAACAATCAAATGCATCCTCTACC
AATACCCAAAATGGTGTAGCTGTATCATCTGGTCCTGCTGTAGTTGAAGAAAGTCATGATCCCTTAACAG
TATTGTCTATTAGTAACGATTTGAAAGGTATTGTTAGTCTCTTAAATCTTGGAAATAAAACTAAAGTACC
TAATCCATTAACCATTTCTACAACAGAGATGGAAAAATTTTATGAGAATATTTTAAAAAATAATGATACC
TATTTTAATGATGATATCAAACAATTCGTAAAATCTAATTCAAAAGTAATTACAGGTTTGACCGAAACAC
AAAAAAATGCATTAAATGATGAAATTAAAAAATTAAAAGATACTTTACAGTTATCATTTGATTTATATAA
TAAATATAAATTAAAATTAGATAGATTATTTAATAAGAAAAAAGAACTTGGCCAAGACAAAATGCAAATT
AAAAAACTTACTTTATTAAAAGAACAATTAGAATCAAAATTGAATTCACTTAATAACCCACATAATGTAT
TACAAAACTTTTCTGTTTTCTTTAACAAAAAAAAAGAAGCTGAAATAGCAGAAACTGAAAACACATTAGA
AAACACAAAAATATTATTGAAACATTATAAAGGACTTGTTAAATATTATAATGGTGAATCATCTCCATTA
AAAACTTTAAGTGAAGTATCAATTCAAACAGAAGATAATTATGCCAATTTAGAAAAATTTAGAGTATTAA
GTAAAATAGATGGAAAACTCAATGATAATTTACATTTAGGAAAGAAAAAATTATCTTTCTTATCAAGTGG
ATTACATCATTTAATTACTGAATTAAAAGAAGTAATAAAAAATAAAAATTATACAGGTAATTCTCCAAGT
GAAAATAATAAGAAAGTTAACGAAGCTTTAAAATCTTACGAAAATTTTCTCCCAGAAGCAAAAGTTACAA
CAGTTGTAACTCCACCTCAACCAGATGTAACTCCATCTCCATTATCTGTAAGGGTAAGTGGTAGTTCAGG
ATCCACAAAAGAAGAAACACAAATACCAACTTCAGGCTCTTTATTAACAGAATTACAACAAGTAGTACAA
TCACAAAATTATGACGAAGAAGATGATTCCTTAGTTGTATTACCCATTTTTGGAGAATCCGAAGATAATG
ACGAATATTTAGATCAAGTAGTAACTGGAGAAGCAATATCTGTCACAATGGATAATATCCTCTCAGGATT
TGAAAATGAATATGATGTTATATATTTAAAACCTTTAGCTGGAGTATATAGAAGCTTAAAAAAACAAATT
GAAAAAAACATTTTTACATTTAATTTAAATTTGAACGATATCTTAAATTCACGTCTTAAGAAACGAAAAT
ATTTCTTAGATGTATTAGAATCTGATTTAATGCAATTTAAACATATATCCTCAAATGAATACATTATTGA
AGATTCATTTAAATTATTGAATTCAGAACAAAAAAACACACTTTTAAAAAGTTACAAATATATAAAAGAA
TCAGTAGAAAATGATATTAAATTTGCACAGGAAGGTATAAGTTATTATGAAAAGGTTTTAGCGAAATATA
AGGATGATTTAGAATCAATTAAAAAAGTTATCAAAGAAGAAAAGGAGAAGTTCCCATCATCACCACCAAC
AACACCTCCGTCACCAGCAAAAACAGACGAACAAAAGAAGGAAAGTAAGTTCCTTCCATTTTTAACAAAC
ATTGAGACCTTATACAATAACTTAGTTAATAAAATTGACGATTACTTAATTAACTTAAAGGCAAAGATTA
ACGATTGTAATGTTGAAAAAAATGAAGCACATGTTAAAATAACTAAACTTAGTGATTTAAAAGCAATTGA
TGACAAAATAGATCTTTTTAAAAACCATAACGACTTCGAAGCAATTAAAAAATTGATAAATGATGATACG
AAAAAAGATATGCTTGGCAAATTACTTAGTACAGGATTAGTTCAAAATTTTCCTAATACAATAATATCAA
AATTAATTGAAGGAAAATTCCAAGATATGTTAAACATTTCACAACACCAATGCGTAAAAAAACAATGTCC
ACAAAATTCTGGATGTTTCAGACATTTAGATGAAAGAGAAGAATGTAAATGTTTATTAAATTACAAACAA
GAAGGTGATAAATGTGTTGAAAATCCAAATCCTACTTGTAACGAAAATAATGGTGGATGTGATGCAGATG
CCAAATGTACCGAAGAAGATTCAGGTAGCAACGGAAAGAAAATCACATGTGAATGTACTAAACCTGATTC
TTATCCATTTTTCGATGGTATTTTCTGCAGTTCCTCTAACTTCTTAGGAATATCATTCTTATTAATACTC
ATGTTAATATTATACAGTTTCATTTAA

>AB502487.1 Plasmodium falciparum msp1 gene for merozoite surface protein-1, complete cds, isolate: Tz93-035
ATGAAGATCATATTCTTTTTATGTTCATTTCTTTTTTTTATTATAAATACACAATGTGTAACACATGAAA
GTTATCAAGAACTTGTCAAAAAACTAGAAGCTTTAGAAGATGCAGTATTGACAGGTTATGGTTTATTTCA
TAAGGAAAAAATGGTATTAAATGAAGGAACAAGTGGAACAGCTGTTACAACTAGTACACCTGGTTCAAAG
GGTTCAGTTACTTCAGGTGGTTCAGGTGGTTCAGTTGCTTCAGGTGGTTCAGGTGGCTCAGTTGCTTCAG
GTGGCTCAGTTGCTTCAGGTGGCTCAGTTGCTTCAGGTGGTTCAGGTAATTCAAGACGTACAAATCCTTC
AGATAATTCAAGTGATTCAGATGCTAAATCTTACGCTGATTTAAAACATAGAGTTCAAAATTACTTGTTC
ACTATTAAAGAACTCAAATATCCCGAACTCTTTGATTTAACCAATCATATGTTAACTTTGTGTGATAATA
TTCATGGTTTCAAATATTTAATTGATGGATATGAAGAAATTAATGAATTATTATATAAATTAAACTTTTA
TTTTGATTTATTAAGAGCAAAATTAAATGATGTATGTGCTAATGATTATTGTCAAATACCTTTCAATCTT
AAAATTCGTGCAAATGAATTAGACGTACTTAAAAAACTTGTGTTCGGATATAGAAAACCATTAGACAATA
TTAAAGATAATGTAGGAAAAATGGAAGATTACATTAAAAAAAATAAAACAACCATAGCAAATATAAATGA
ATTAATTGAAGGAAGTAAGAAAACAATTGATCAAAATAAGAATGCAGATAATGAAGAAGGAAAAAAAAAA
TTATACCAAGCTCAATATGATCTTTCTATTTACAATAAACAATTAGAAGAAGCACATAATTTAATAAGCG
TTTTAGAAAAACGTATTGACACTTTAAAAAAAAATGAAAACATAAAGAAATTACTTGAAGATATAGATAA
AATTAAAACAGATGCCGAAAAACCCACTACTGGAAGTAAACCAAATACTCTCCTTGATAAGAACAAAAAA
ATCGAGGAACACGAAGAAAAAATAAAAGAAATTGCCAAAACTATTAAATTTAACATTGATAGTTTATTTA
CTGATCCACTTGAATTAGAATATTATTTAAGAGAAAAAAATAAAAAAGTTGATGTAACACCTAAATCACA
AGATCCTACGAAATCTGTTCAAATACCAAAAGTTCCTTATCCAAATGGTATTGTATATCCTTTACCACTC
ACTGATATTCATAATTCATTAGCTGCAGATAATGATAAAAATTCATATGGTGATTTAATGAATCCTGATA
CTAAAGAAAAAATTAATGAAAAAATTATTACAGATAATAAGGAAAGAAAAATATTCATTAATAACATTAA
AAAACAAATTGATTTAGAAGAAAAAAACATTAATCACACAAAAGAACAAAATAAAAAATTACTTGAAGAT
TATGAAAAGTCAAAAAAGGATTATGAAGAATTACTTGAAAAATTTTATGAAATGAAATTTAATAATAATT
TTAACAAAGATGTCGTAGATAAAATGTTCAGTGCAAGATATACATATAATGTTGAAAAACAAAGATATAA
TAATAAATTTTCATCCTCTAATAATTCTGTATATAATGTTCAAAAATTAAAAAAGGCTCTTTCATATCTT
GAAGATTATTCTTTAAGAAAAGGAATTTCTGAAAAAGATTTTAATCATTATTATACTTTGAAAACTGGCC
TCGAAGCTGATATAAAAAAATTAACAGAAGAAATAAAGAGTAGTGAAAACAAAATTCTAGAAAAAAATTT
TAAAGGACTAACACATTCAGCAAATGCTTCCTTAGAAGTATATGATATTGTAAAATTACAAGTACAAAAA
GTTTTATTAATTAAAAAAATAGAAGACTTAAGAAAGATAGAATTATTTTTAAAAAATGCACAACTAAAAG
ATAGTATTCATGTACCAAATATTTATAAACCACAAAATAAACCAGAACCATATTATTTAATTGTATTAAA
AAAAGAAGTAGATAAATTAAAAGAATTTATACCAAAAGTAAAAGACATGTTAAAGAAAGAACAAGCTGTC
TTATCAAGTATTACACAACCTTTAGTTGCAGCAAGCGAAACAACTGAAGATGGGGGTCACTCCACACACA
CATTATCCCAATCAGGAGAAACAGAAGTAACAGAAGAAACAGAAGTAACAGAAGAAACAGAAGTAACAGA
AGAAACAGTAGGACACACAACGGTAACAATAACATTACCACCAAAAGAAGTAAAAGTTGTTGAAAATTCA
ATAGAACATAAGAGTAATGACAATTCACAAGCCTTGACAAAAACAGTTTATCTAAAGAAATTAGATGAAT
TTTTAACTAAATCATATATATGTCATAAATATATTTTAGTATCAAACTCTAGTATGGACCAAAAATTATT
AGAGGTATATAATCTTACTCCAGAAGAAGAAAATGAATTAAAATCATGTGATCCATTAGATTTATTATTT
AATATTCAAAATAACATACCTGCTATGTATTCATTATATGATAGTATGAACAATGATTTACAACATCTCT
TTTTTGAATTATATCAAAAGGAAATGATTTATTATTTACATAAACTAAAAGAGGAAAATCACATCAAAAA
ATTATTAGAGGAGCAAAAACAAATAACTGGAACATCATCTACATCCAGTCCTGGAAATACAACCGTAAAT
ACTGCTCAATCCGCAACTCACAGTAATTCCCAAAACCAACAATCAAATGCATCCTCTACCAATACCCAAA
ATGGTGTAGCTGTATCATCTGGTCCTGCTGTAGTTGAAGAAAGTCATGATCCCTTAACAGTATTGTCTAT
TAGTAACGATTTGAAAGGTATTGTTAGTCTCTTAAATCTTGGAAATAAAACTAAAGTACCTAATCCATTA
ACCATTTCTACAACAGAGATGGAAAAATTTTATGAGAATATTTTAAAAAATAATGATACCTATTTTAATG
ATGATATCAAACAATTCGTAAAATCTAATTCAAAAGTAATTACAGGTTTGACCGAAACACAAAAAAATGC
ATTAAATGATGAAATTAAAAAATTAAAAGATACTTTACAGTTATCATTTGATTTATATAATAAATATAAA
TTAAAATTAGATAGATTATTTAATAAGAAAAAAGAACTTGGCCAAGACAAAATGCAAATTAAAAAACTTA
CTTTATTAAAAGAACAATTAGAATCAAAATTGAATTCACTTAATAACCCACATAATGTATTACAAAACTT
TTCTGTTTTCTTTAACAAAAAAAAAGAAGCTGAAATAGCAGAAACTGAAAACACATTAGAAAACACAAAA
ATATTATTGAAACATTATAAAGGACTTGTTAAATATTATAATGGTGAATCATCTCCATTAAAAACTTTAA
GTGAAGTATCAATTCAAACAGAAGATAATTATGCCAATTTAGAAAAATTTAGAGTATTAAGTAAAATAGA
TGGAAAACTCAATGATAATTTACATTTAGGAAAGAAAAAATTATCTTTCTTATCAAGTGGATTACATCAT
TTAATTACTGAATTAAAAGAAGTAATAAAAAATAAAAATTATACAGGTAATTCTCCAAGTGAAAATAATA
AGAAAGTTAACGAAGCTTTAAAATCTTACGAAAATTTTCTCCCAGAAGCAAAAGTTACAACAGTTGTAAC
TCCACCTCAACCAGATGTAACTCCATCTCCATTATCTGTAAGGGTAAGTGGTAGTTCAGGATCCACAAAA
GAAGAAACACAAATACCAACTTCAGGCTCTTTATTAACAGAATTACAACAAGTAGTACAATTACAAAATT
ATGACGAAGAAGATGATTCCTTAGTTGTATTACCCATTTTTGGAGAATCCGAAGATAATGACGAATATTT
AGATCAAGTAGTAACTGGAGAAGCAATATCTGTCACAATGGATAATATCCTCTCAGGATTTGAAAATGAA
TATGATGTTATATATTTAAAACCTTTAGCTGGAGTATATAGAAGCTTAAAAAAACAAATTGAAAAAAACA
TTTTTACATTTAATTTAAATTTGAACGATATCTTAAATTCACGTCTTAAGAAACGAAAATATTTCTTAGA
TGTATTAGAATCTGATTTAATGCAATTTAAACATATATCCTCAAATGAATACATTATTGAAGATTCATTT
AAATTATTGAATTCAGAACAAAAAAACACACTTTTAAAAAGTTACAAATATATAAAAGAATCAGTAGAAA
ATGATATTAAATTTGCACAGGAAGGTATAAGTTATTATGAAAAGGTTTTAGCGAAATATAAGGATGATTT
AGAATCAATTAAAAAAGTTATCAAAGAAGAAAAGGAGAAGTTCCCATCATCACCACCAACAACACCTCCG
TCACCAGCAAAAACAGACGAACAAAAGAAGGAAAGTAAGTTCCTTCCATTTTTAACAAACATTGAGACCT
TATACAATAACTTAGTTAATAAAATTGACCATTACTTAATTAACTTAAAGGCAAAGATTAACGATTGTAA
TGTTGAAAAAAATGAAGCACATGTTAAAATAACTAAACTTAGTGATTTAAAAGCAATTGATGACAAAATA
GATCTTTTTAAAAACCATAACGACTTCGAAGCAATTAAAAAATTGATAAATGATGATACGAAAAAAGATA
TGCTTGGCAAATTACTTAGTACAGGATTAGTTCAAAATTTTCCTAATACAATAATATCAAAATTAATTGA
AGGAAAATTCCAAGATATGTTAAACATTTCACAACACCAATGCGTAAAAAAACAATGTCCAGAAAATTCT
GGATGTTTCAGACATTTAGATGAAAGAGAAGAATGTAAATGTTTATTAAATTACAAACAAGAAGGTGATA
AATGTGTTGAAAATCCAAATCCTACTTGTAACGAAAATAATGGTGGATGTGATGCAGATGCCAAATGTAC
CGAAGAAGATTCAGGTAGCAACGGAAAGAAAATCACATGTGAATGTACTAAACCTGATTCTTATCCACTT
TTCGATGGTATTTTCTGCAGTTCCTCTAACTTCTTAGGAATATCATTCTTATTAATACTCATGTTAATAT
TATACAGTTTCATTTAA

>AB502488.1 Plasmodium falciparum msp1 gene for merozoite surface protein-1, complete cds, isolate: Tz93-038
ATGAAGATCATATTCTTTTTATGTTCATTTCTTTTTTTTATTATAAATACACAATGTGTAACACATGAAA
GTTATCAAGAACTTGTCAAAAAACTAGAAGCTTTAGAAGATGCAGTATTGACAGGTTATAGTTTATTTCA
AAAGGAAAAAATGGTATTAAAGGATGGAGCAAATACTCAAGTTGTTGCAAAGCCTGCAGATGCTGTAAGT
ACTCAAAGTGCTAAAAATCCTCCAGGTGCTACAGTACCTTCAGGTACTGCAAGTACTAAAGGTGCTATAA
GATCTCCAGGTGCTGCAAATCCTTCAGATGATTCAAGTGATTCAGATGCTAAATCTTACGCTGATTTAAA
ACATAGAGTTCAAAATTACTTGTTCACTATTAAAGAACTCAAATATCCCGAACTCTTTGATTTAACCAAT
CATATGTTAACTTTGTGTGATAATATTCATGGTTTCAAATATTTAATTGATGGATATGAAGAAATTAATG
AATTATTATATAAATTAAACTTTTATTTTGATTTATTAAGAGCAAAATTAAATGATGTATGTGCTAATGA
TTATTGTCAAATACCTTTCAATCTTAAAATTCGTGCAAATGAATTAGACGTACTTAAAAAACTTGTGTTC
GGATATAGAAAACCATTAGACAATATTAAAGATAATGTAGGAAAAATGGAAGATTACATTAAAAAAAATA
AAACAACCATAGCAAATATAAATGAATTAATTGAAGGAAGTAAGAAAACAATTGATCAAAATAAGAATGC
AGATAATGAAGAAGGAAAAAAAAAATTATACCAAGCTCAATATGATCTTTCTATTTACAATAAACAATTA
GAAGAAGCACATAATTTAATAAGCGTTTTAGAAAAACGTATTGACACTTTAAAAAAAAATGAAAACATTA
AGGAATTACTTGATAAGATAAATGAAATTAAAAATCCCCCACCGGCCAATTCTGGAAATACACCAAATAC
TCTCCTTGATAAGAACAAAAAAATCGAGGAACACGAAGAAAAAATAAAAGAAATTGCCAAAACTATTAAA
TTTAACATTGATAGTTTATTTACTGATCCACTTGAATTAGAATATTATTTAAGAGAAAAAAATAAAAAAG
TTGATGTAACACCTAAATCACAAGATCCTACGAAATCTGTTCAAATACCAAAAGTTCCTTATCCAAATGG
TATTGTATATCCTTTACCACTCACTGATATTCATAATTCATTAGCTGCAGATAATGATAAAAATTCATAT
GGTGATTTAATGAATCCTGGTACTAAAGAAAAAATTAATGAAAAAATTATTACAGATAATAAGGAAAGAA
AAATATTCATTAATAACATTAAAAAACAAATTGATTTAGAAGAAAAAAACATTAATCACACAAAAGAACA
AAATAAAAAATTACTTGAAGATTATGAAAAGTCAAAAAAGGATTATGAAGAATTACTTGAAAAATTTTAT
GAAATGAAATTTAATAATAATTTTAACAAAGATGTCGTAGATAAAATGTTCAGTGCAAGATATACATATA
ATGTTGAAAAACAAAGATATAATAATAAATTTTCATCCTCTAATAATTCTGTATATAATGTTCAAAAATT
AAAAAAGGCTCTTTCATATCTTGAAGATTATTCTTTAAGAAAAGGAATTTCTGAAAAAGATTTTAATCAT
TATTATACTTTGAAAACTGGCCTCGAAGCTGATATAAAAAAATTAACAGAAGAAATAAAGAGTAGTGAAA
ACAAAATTCTAGAAAAAAATTTTAAAGGACTAACACATTCAGCAAATGCTTCCTTAGAAGTATCTGATAT
TGTAAAATTACAAGTACAAAAAGTTTTATTAATTAAAAAAATAGAAGACTTAAGAAAGATAGAATTATTT
TTAAAAAATGCACAACTAAAAGATAGTATTCATGTACCAAATATTTATAAACCACAAAATAAACCAGAAC
CATATTATTTAATTGTATTAAAAAAAGAAGTAGATAAATTAAAAGAATTTATACCAAAAGTAAAAGACAT
GTTAAAGAAAGAACAAGCTGTCTTATCAAGTATTACACAACCTTTAGTTGCAGCAAGCGAAACAACTGAA
GATGGGGGTCACTCCACACACACATTATCCCAATCAGGAGAAACAGAAGTAACAGAAGAAACAGAAGAAA
CAGAAGAAACAGTAGGACACACAACAACGGTAACAATAACATTACCACCAACACAACCATCACCACCAAA
AGAAGTAAAAGTTGTTGAAAATTCAATAGAACATAAGAGTAATGACAATTCACAAGCCTTGACAAAAACA
GTTTATCTAAAGAAATTAGATGAATTTTTAACTAAATCATATATATGTCATAAATATATTTTAGTATCAA
ACTCTAGTATGGACCAAAAATTATTAGAGGTATATAATCTTACTCCAGAAGAAAAAAATGAATTAAAATC
ATGTGATCCATTAGATTTATTATTTAATATTCAAAATAACATACCTGCTATGTATTCATTATATGATAGT
ATGAACAATGATTTACAACATCTCTTTTTTGAATTATATCAAAAGGAAATGATTTATTATTTACATAAAC
TAAAAGAGGAAAATCACATCAAAAAATTATTAGAGGAGCAAAAACAAATAACTGGAACATCATCTACATC
CAGTCCTGGAAATACAACCGTAAATACTGCTCAATCCGCAACTCACAGTAATTCCCAAAACCAACAATCA
AATGCATCCTCTACCAATACCCAAAATGGTGTAGCTGTATCATCTGGTCCTGCTGTAGTTGAAGAAAGTC
ATGATCCCTTAACAGTATTGTCTATTAGTAACGATTTGAAAGGTATTGTTAGTCTCTTAAATCTTGGAAA
TAAAACTAAAGTACCTAATCCATTAACCATTTCTACAACAGAGATGGAAAAATTTTATGAGAATATTTTA
AAAAATAATGATACCTATTTTAATGATGATATCAAACAATTCGTAAAATCTAATTCAAAAGTAATTACAG
GTTTGACCGAAACACAAAAAAATGCATTAAATGATGAAATTAAAAAATTAAAAGATACTTTACAGTTATC
ATTTGATTTATATAATAAATATAAATTAAAATTAGATAGATTATTTAATAAGAAAAAAGAACTTGGCCAA
GACAAAATGCAAATTAAAAAACTTACTTTATTAAAAGAACAATTAGAATCAAAATTGAATTCACTTAATA
ACCCACATAATGTATTACAAAACTTTTCTGTTTTCTTTAACAAAAAAAAAGAAGCTGAAATAGCAGAAAC
TGAAAACACATTAGAAAACACAAAAATATTATTGAAACATTATAAAGGACTTGTTAAATATTATAATGGT
GAATCATCTCCATTAAAAACTTTAAGTGAAGTATCAATTCAAACAGAAGATAATTATGCCAATTTAGAAA
AATTTAGAGTATTAAGTAAAATAGATGGAAAACTCAATGATAATTTACATTTAGGAAAGAAAAAATTATC
TTTCTTATCAAGTGGATTACATCATTTAATTACTGAATTAAAAGAAGTAATAAAAAATAAAAATTATACA
GGTAATTCTCCAAGTGAAAATAATAAGAAAGTTAACGAAGCTTTAAAATCTTACGAAAATTTTCTCCCAG
AAGCAAAAGTTACAACAGTTGTAACTCCACCTCAACCAGATGTAACTCCATCTCCATTATCTGTAAGGGT
AAGTGGTAGTTCAGGATCCACAAAAGAAGAAACACAAATACCAACTTCAGGCTCTTTATTAACAGAATTA
CAACAAGTAGTACAATTACAAAATTATGACGAAGAAGATGATTCCTTAGTTGTATTACCCATTTTTGGAG
AATCCGAAGATAATGACGAATATTTAGATCAAGTAGTAACTGGAGAAGCAATATCTGTCACAATGGATAA
TATCCTCTCAGGATTTGAAAATGAATATGATGTTATATATTTAAAACCTTTAGCTGGAGTATATAGAAGC
TTAAAAAAACAAATTGAAAAAAACATTTTTACATTTAATTTAAATTTGAACGATATCTTAAATTCACGTC
TTAAGAAACGAAAATATTTCTTAGATGTATTAGAATCTGATTTAATGCAATTTAAACATATATCCTCAAA
TGAATACATTATTGAAGATTCATTTAAATTATTGAATTCAGAACAAAAAAACACACTTTTAAAAAGTTAC
AAATATATAAAAGAATCAGTAGAAAATGATATTAAATTTGCACAGGAAGGTATAAGTTATTATGAAAAGG
TTTTAGCGAAATATAAGGATGATTTAGAATCAATTAAAAAAGTTATCAAAGAAGAAAAGGAGAAGTTCCC
ATCATCACCACCAACAACACCTCCGTCACCAGCAAAAACAGACGAACAAAAGAAGGAAAGTAAGTTCCTT
CCATTTTTAACAAACATTGAGACCTTATACAATAACTTAGTTAATAAAATTGACGATTACTTAATTAACT
TAAAGGCAAAGATTAACGATTGTAATGTTGAAAAAGATGAAGCACATGTTAAAATAACTAAACTTAGTGA
TTTAAAAGCAATTGATGACAAAATAGATCTTTTTAAAAACCCTTACGACTTCGAAGCAATTAAAAAATTG
ATAAATGATGATACGAAAAAAGATATGCTTGGCAAATTACTTAGTACAGGATTAGTTCAAAATTTTCCTA
ATACAATAATATCAAAATTAATTGAAGGAAAATTCCAAGATATGTTAAACATTTCACAACACCAATGCGT
AAAAAAACAATGTCCAGAAAATTCTGGATGTTTCAGACATTTAGATGAAAGAGAAGAATGTAAATGTTTA
TTAAATTACAAACAAGAAGGTGATAAATGTGTTGAAAATCCAAATCCTACTTGTAACGAAAATAATGGTG
GATGTGATGCAGATGCCAAATGTACCGAAGAAGATTCAGGTAGCAACGGAAAGAAAATCACATGTGAATG
TACTAAACCTGATTCTTATCCACTTTTCGATGGTATTTTCTGCAGTTCCTCTAACTTCTTAGGAATATCA
TTCTTATTAATACTCATGTTAATATTATACAGTTTCATTTAA

>AB502489.1 Plasmodium falciparum msp1 gene for merozoite surface protein-1, complete cds, isolate: Tz93-041
ATGAAGATCATATTCTTTTTATGTTCATTTCTTTTTTTTATTATAAATACACAATGTGTAACACATGAAA
GTTATCAAGAACTTGTCAAAAAACTAGAAGCTTTAGAAGATGCAGTATTGACAGGTTATAGTTTATTTCA
AAAGGAAAAAATGGTATTAAAGGATGGAGCAAATACTCAAGTTGTTGCAAAGCCTGCAGATGCTGTAAGT
ACTCAAAGTGCTAAAAATCCTCCAGGTGCTACAGTACCTTCAGGTACTGCAAGTACTAAAGGTGCTATAA
GATCTCCAGATGCTGCAAATCCTTCAGATGATTCAAGTGATTCAGATGCTAAATCTTACGCTGATTTAAA
ACATAGAGTTCAAAATTACTTGTTCACTATTAAAGAACTCAAATATCCCGAACTCTTTGATTTAACCAAT
CATATGTTAACTTTGTGTGATAATATTCATGGTTTCAAATATTTAATTGATGGATATGAAGAAATTAATG
AATTATTATATAAATTAAACTTTTATTTTGATTTATTAAGAGCAAAATTAAATGATGTATGTGCTAATGA
TTATTGTCAAATACCTTTCAATCTTAAAATTCGTGCAAATGAATTAGACGTACTTAAAAAACTTGTGTTC
GGATATAGAAAACCATTAGACAATATTAAAGATAATGTAGGAAAAATGGAAGATTACATTAAAAAAAATA
AAACAACCATAGCAAATATAAATGAATTAATTGAAGGAAGTAAGAAAACAATTGATCAAAATAAGAATGC
AGATAATGAAGAAGGAAAAAAAAAATTATACCAAGCTCAATATGATCTTTCTATTTACAATAAACAATTA
GAAGAAGCACATAATTTAATAAGCGTTTTAGAAAAACGTATTGACACTTTAAAAAAAAATGAAAACATAA
AGAAATTACTTGAAGATATAGATAAAATTAAAACAGATGCCGAAAAACTCACTACTGGAAGTAAACCAAA
TCCTCTCCCTGAGAATAAGAAAAAAGAAGTCGAGGGACACGAAGAAAAAATAAAAGAAATTGCCAAAACT
ATTAAATTTAACATTGATAGTTTATTTACTGATCCACTTGAATTAGAATATTATTTAAGAGAAAAAAATA
AAAAAGTTGATGTAACACCTAAATCACAAGATCCTACGAAATCTGTTCAAATACCAAAAGTTCCTTATCC
AAATGGTATTGTATATCCTTTACCACTCACTGATATTCATAATTCATTAGCTGCAGATAATGATAAAAAT
TCATATGGTGATTTAATGAATCCTGATACTAAAGAAAAAATTAATGAAAAAATTATTACAGATAATAAGG
AAAGAAAAATATTCATTAATAACATTAAAAAACAAATTGATTTAGAAGAAAAAAAAATTAATCACACAAA
AGAACAAAATAAAAAATTACTTGAAGATTATGAAAAGTCAAAAAAGGATTATGAAGAATTACTTGAAAAA
TTTTATGAAATGAAATTTAATAATAATTTTGACAAAGATGTCGTAGATAAAATATTCAGTGCAAGATATA
CATATAATGTTGAAAAACAAAGATATAATAATAAATTTTCATCCTCTAATAATTCTGTATATAATGTTCA
AAAATTAAAAAAGGCTCTTTCATATCTTGAAGATTATTCTTTAAGAAAAGGAATTTCTGAAAAAGATTTT
AATCATTATTATACTTTGAAAACTGGCCTCGAAGCTGATATAAAAAAATTAACAGAAGAAATAAAGAGTA
GTGAAAACAAAATTCTAGAAAAAAATTTTAAAGGACTAACACATTCAGCAAATGCTTCCTTAGAAGTATC
TGATATTGTAAAATTACAAGTACAAAAAGTTTTATTAATTAAAAAAATAGAAGACTTAAGAAAGATAGAA
TTATTTTTAAAAAATGCACAACTAAAAGATAGTATTCATGTACCAAATATTTATAAACCACAAAATAAAC
CAGAACCATATTATTTAATTGTATTAAAAAAAGAAGTAGATAAATTAAAAGAATTTATACCAAAAGTAAA
AGACATGTTAAAGAAAGAACAAGCTGTCTTATCAAGTATTACACAACCTTTAGTTGCAGCAAGCGAAACA
ACTGAAGATGGGGGTCACTCCACACACACATTATCCCAATCAGGAGAAACAGAAGTAACAGAAGAAACAG
AAGAAACAGAAGAAACAGTAGGACACACAACAACGGTAACAATAACATTACCACCAACACAACCATCACC
ACCAAAAGAAGTAAAAGTTGTTGAAAATTCAATAGAACATAAGAGTAATGACAATTCACAAGCCTTGACA
AAAACAGTTTATCTAAAGAAATTAGATGAATTTTTAACTAAATCATATATATGTCATAAATATATTTTAG
TATCAAACTCTAGTATGGACCAAAAATTATTAGAGGTATATAATCTTACTCCAGAAGAAGAAAATGAATT
AAAATCATGTGATCCATTAGATTTATTATTTAATATTCAAAATAACATACCTGCTATGTATTCATTATAT
GATAGTATGAACAATGATTTACAACATCTCTTTTTTGAATTATATCAAAAGGAAATGATTTATTATTTAC
ATAAACTAAAAGAGGAAAATCACATCAAAAAATTATTAGAGGAGCAAAAACAAATAACTGGAACATCATC
TACATCCAGTCCTGGAAATACAACCGTAAATACTGCTCAATCCGCAACTCACAGTAATTCCCAAAACCAA
CAATCAAATGCATCCTCTACCAATACCCAAAATGGTGTAGCTGTATCATCTGGTCCTGCTGTAGTTGAAG
AAAGTCATGATCCCTTAACAGTATTGTCTATTAGTAACGATTTGAAAGGTATTGTTAGTCTCTTAAATCT
TGGAAATAAAACTAAAGTACCTAATCCATTAACCATTTCTACAACAGAGATGGAAAAATTTTATGAGAAT
ATTTTAAAAAATAATGATACCTATTTTAATGATGATATCAAACAATTCGTAAAATCTAATTCAAAAGTAA
TTACAGGTTTGACCGAAACACAAAAAAATGCATTAAATGATGAAATTAAAAAATTAAAAGATACTTTACA
GTTATCATTTGATTTATATAATAAATATAAATTAAAATTAGATAGATTATTTAATAAGAAAAAAGAACTT
GGCCAAGACAAAATGCAAATTAAAAAACTTACTTTATTAAAAGAACAATTAGAATCAAAATTGAATTCAC
TTAATAACCCACATAATGTATTACAAAACTTTTCTGTTTTCTTTAACAAAAAAAAAGAAGCTGAAATAGC
AGAAACTGAAAACACATTAGAAAACACAAAAATATTATTGAAACATTATAAAGGACTTGTTAAATATTAT
AATGGTGAATCATCTCCATTAAAAACTTTAAGTGAAGTATCAATTCAAACAGAAGATAATTATGCCAATT
TAGAAAAATTTAGAGTATTAAGTAAAATAGATGGAAAACTCAATGATAATTTACATTTAGGAAAGAAAAA
ATTATCTTTCTTATCAAGTGGATTACATCATTTAATTACTGAATTAAAAGAAGTAATAAAAAATAAAAAT
TATACAGGTAATTCTCCAAGTGAAAATAATAAGAAAGTTAACGAAGCTTTAAAATCTTACGAAAATTTTC
TCCCAGAAGCAAAAGTTACAACAGTTGTAACTCCACCTCAACCAGATGTAACTCCATCTCCATTATCTGT
AAGGGTAAGTGGTAGTTCAGGATCCACAAAAGAAGAAACACAAATACCAACTTCAGGCTCTTTATTAACA
GAATTACAACAAGTAGTACAATTACAAAATTATGACGAAGAAGATGATTCCTTAGTTGTATTACCCATTT
TTGGAGAATCCGAAGATAATGACGAATATTTAGATCAAGTAGTAACTGGAGAAGCAATATCTGTCACAAT
GGATAATATCCTCTCAGGATTTGAAAATGAATATGATGTTATATATTTAAAACCTTTAGCTGGAGTATAT
AGAAGCTTAAAAAAACAAATTGAAAAAAACATTTTTACATTTAATTTAAATTTGAACGATATCTTAAATT
CACGTCTTAAGAAACGAAAATATTTCTTAGATGTATTAGAATCTGATTTAATGCAATTTAAACATATATC
CTCAAATGAATACATTATTGAAGATTCATTTAAATTATTGAATTCAGAACAAAAAAACACACTTTTAAAA
AGTTACAAATATATAAAAGAATCAGTAGAAAATGATATTAAATTTGCACAGGAAGGTATAAGTTATTATG
AAAAGGTTTTAGCGAAATATAAGGATGATTTAGAATCAATTAAAAAAGTTATCAAAGAAGAAAAGGAGTT
CCCATCATCACCACCAACAACACCTCCGTCACCAGCAAAAACAGACGAACAAAAGAAGGAAAGTAAGTTC
CTTCCATTTTTAACAAACATTGAGACCTTATACAATAACTTAGTTAATAAAATTGACGATTACTTAATTA
ACTTAAAGGCAAAGATTAACGATTGTAATGTTGAAAAAAATGAAGCACATGTTAAAATAACTAAACTTAG
TGATTTAAAAGCAATTGATGACAAAATAGATCTTTTTAAAAACCATAACGACTTCGAAGCAATTAAAAAA
TTGATAAATGATGATACGAAAAAAGATATGCTTGGCAAATTACTTAGTACAGGATTAGTTCAAAATTTTC
CTAATACAATAATATCAAAATTAATTGAAGGAAAATTCCAAGATATGTTAAACATTTCACAACACCAATG
CGTAAAAAAACAATGTCCAGAAAATTCTGGATGTTTCAGACATTTAGATGAAAGAGAAGAATGTAAATGT
TTATTAAATTACAAACAAGAAGGTGATAAATGTGTTGAAAATCCAAATCCTACTTGTAACGAAAATAATG
GTGGATGTGATGCAGATGCCACATGTACCGAAGAAGATTCAGGTAGCAGCAGAAAGAAAATCACATGTGA
ATGTACTAAACCTGATTCTTATCCACTTTTCGATGGTATTTTCTGCAGTTCCTCTAACTTCTTAGGAATA
TCATTCTTATTAATACTCATGTTAATATTATACAGTTTCATTTAA

>AB502490.1 Plasmodium falciparum msp1 gene for merozoite surface protein-1, complete cds, isolate: Tz93-046
ATGAAGATCATATTCTTTTTATGTTCATTTCTTTTTTTTATTATAAATACACAATGTGTAACACATGAAA
GTTATCAAGAACTTGTCAAAAAACTAGAAGCTTTAGAAGATGCAGTATTGACAGGTTATGGTTTATTTCA
TAAGGAAAAAATGATCTTAAATGAAGAAGAAATTACTACAAAAGGTGCAAGTGCTCAAAGTGGTACAAGT
GGTACAAGTGGTACAAGTGGTACAAGTGGTACAAGTGGTACAAGTGGTACAAGTGGTACAAGTGGTACAA
GTGGTACAAGTGGTCCAAGTGGTCCAAGTGGTACAAGTCCATCATCTCGTTCAAACACTTTACCTCGTTC
AAATACTTCATCTGGTGCAAGCCCTCCAGCTGATGCAAGCGATTCAGATGCTAAATCTTACGCTGATTTA
AAACACAGAGTACGAAATTACTTGTTCACTATTAAAGAACTCAAATATCCCGAACTCTTTGATTTAACCA
ATCATATGTTAACTTTGTGTGATAATATTCATGGTTTCAAATATTTAATTGATGGATATGAAGAAATTAA
TGAATTATTATATAAATTAAACTTTTATTTTGATTTATTAAGAGCAAAATTAAATGATGTATGTGCTAAT
GATTATTGTCAAATACCTTTCAATCTTAAAATTCGTGCAAATGAATTAGACGTACTTAAAAAACTTGTGT
TCGGATATAGAAAACCATTAGACAATATTAAAGATAATGTAGGAAAAATGGAAGATTACATTAAAAAAAA
TAAAACAACCATAGCAAATATAAATGAATTAATTGAAGGAAGTAAGAAAACAATTGATCAAAATAAGAAT
GCAGATAATGAAGAAGGAAAAAAAAAATTATACCAAGCTCAATATGATCTTTTTATTTACAATAAACAAT
TACAAGAAGCACATAATTTAATAAGCGTTTTAGAAAAACGTATTGACACTTTAAAAAAAAATGAAAACAT
TAAGGAATTACTTGATAAGATAAATGAAATTAAAAATCCCCCACCGGCCAATTCTGGAAATACACCAAAT
ACTCTCCTTGATAAGAACAAAAAAATCGAGGAACACGAAGAAAAAATAAAAGAAATTGCCAAAACTATTA
AATTTAACATTGATAGTTTATTTACTGATCCACTTGAATTAGAATATTATTTAAGAGAAAAAAATAAAAA
AGTTGATGTAACACCTAAATCACAAGATCCTACGAAATCTGTTCAAATACCAAAAGTTCCTTATCCAAAT
GGTATTGTATATCCTTTACCACTCACTGATATTCATAATTCATTAGCTGCAGATAATGATAAAAATTCAT
ATGGTGATTTAATGAATCCTGATACTAAAGAAAAAATTAATGAAAAAATTATTACAGATAATAAGGAAAG
AAAAATATTCATTAATAACATTAAAAAACAAATTGATTTAGAAGAAAAAAACATTAATCACACAAAAGAA
CAAAATAAAAAATTACTTGAAGATTATGAAAAGTCAAAAAAGGATTATGAAGAATTACTTGAAAAATTTT
ATGAAATGAAATTTAATAATAATTTTAACAAAGATGTCGTAGATAAAATGTTCAGTGCAAGATATACATA
TAATGTTGAAAAACAAAGATATAATAATAAATTTTCATCCTCTAATAATTCTGTATATAATGTTCAAAAA
TTAAAAAAGGCTCTTTCATATCTTGAAGATTATTCTTTAAGAAAAGGAATTTCTGAAAAAGATTTTAATC
ATTATTATACTTTGAAAACTGGCCTCGAAGCTGATATAAAAAAATTAACAGAAGAAATAAAGAGTAGTGA
AAACAAAATTCTAGAAAAAAATTTTAAAGGACTAACACATTCAGCAAATGCTTCCTTAGAAGTATCTGAT
ATTGTAAAATTACAAGTACAAAAAGTTTTATTAATTAAAAAAATAGAAGACTTAAGAAAGATAGAATTAT
TTTTAAAAAATGCACAACTAAAAGATAGTATTCATGTACCAAATATTTATAAACCACAAAATAAACCAGA
ACCATATTATTTAATTGTATTAAAAAAAGAAGTAGATAAATTAAAAGAATTTATACCAAAAGTAAAAGAC
ATGTTAAAGAAAGAACAAGCTGTCTTATCAAGTATTACACAACCTTTAGTTGCAGCAAGCGAAACAACTG
AAGATGGGGGTCACTCCACACACACATTATCCCAATCAGGAGAAACAGAAGTAACAGAAGAAACAGTAGG
ACACACAACAACGGTAACAATAACATTACCACCAAAAGAAGTAAAAGTTGTTGAAAATTCAATAGAACAT
AAGAGTAATGACAATTCACAAGCCTTGACAAAAACAGTTTATCTAAAGAAATTAGATGAATTTTTAACTA
AATCATATATATGTCATAAATATATTTTAGTATCAAACTCTAGTATGGACCAAAAATTATTAGAGGTATA
TAATCTTACTCCAGAAGAAAAAAATGAATTAAAATCATGTGATCCATTAGATTTATTATTTAATATTCAA
AATAACATACCTGCTATGTATTCATTATATGATAGTATGAACAATGATTTACAACATCTCTTTTTTGAAT
TATATCAAAAGGAAATGATTTATTATTTACATAAACTAAAAGAGGAAAATCACATCAAAAAATTATTAGA
GGAGCAAAAACAAATAACTGGAACATCATCTACATCCAGTCCTGGAAATACAACCGTAAATACTGCTCAA
TCCGCAACTCACAGTAATTCCCAAAACCAACAATCAAATGCATCCTCTACCAATACCCAAAATGGTGTAG
CTGTATCATCTGGTCCTGCTGTAGTTGAAGAAAGTCATGATCCCTTAACAGTATTGTCTATTAGTAACGA
TTTGAAAGGTATTGTTAGTCTCTTAAATCTTGGAAATAAAACTAAAGTACCTAATCCATTAACCATTTCT
ACAACAGAGATGGAAAAATTTTATGAGAATATTTTAAAAAATAATGATACCTATTTTAATGATGATATCA
AACAATTCGTAAAATCTAATTCAAAAGTAATTACAGGTTTGACCGAAACACAAAAAAATGCATTAAATGA
TGAAATTAAAAAATTAAAAGATACTTTACAGTTATCATTTGATTTATATAATAAATATAAATTAAAATTA
GATAGATTATTTAATAAGAAAAAAGAACTTGGCCAAGACAAAATGCAAATTAAAAAACTTACTTTATTAA
AAGAACAATTAGAATCAAAATTGAATTCACTTAATAACCCACATAATGTATTACAAAACTTTTCTGTTTT
CTTTAACAAAAAAAAAGAAGCTGAAATAGCAGAAACTGAAAACACATTAGAAAACACAAAAATATTATTG
AAACATTATAAAGGACTTGTTAAATATTATAATGGTGAATCATCTCCATTAAAAACTTTAAGTGAAGTAT
CAATTCAAACAGAAGATAATTATGCCAATTTAGAAAAATTTAGAGTATTAAGTAAAATAGATGGAAAACT
CAATGATAATTTACATTTAGGAAAGAAAAAATTATCTTTCTTATCAAGTGGATTACATCATTTAATTACT
GAATTAAAAGAAGTAATAAAAAATAAAAATTATACAGGTAATTCTCCAAGTGAAAATAATAAGAAAGTTA
ACGAAGCTTTAAAATCTTACGAAAATTTTCTCCCAGAAGCAAAAGTTACAACAGTTGTAACTCCACCTCA
ACCAGATGTAACTCCATCTCCATTATCTGTAAGGGTAAGTGGTAGTTCAGGATCCACAAAAGAAGAAACA
CAAATACCAACTTCAGGCTCTTTATTAACAGAATTACAACAAGTAGTACAATTACAAAATTATGACGAAG
AAGATGATTCCTTAGTTGTATTACCCATTTTTGGAGAATCCGAAGATAATGACGAATATTTAGATCAAGT
AGTAACTGGAGAAGCAATATCTGTCACAATGGATAATATCCTCTCAGGATTTGAAAATGAATATGATGTT
ATATATTTAAAACCTTTAGCTGGAGTATATAGAAGCTTAAAAAAACAAATTGAAAAAAACATTTTTACAT
TTAATTTAAATTTGAACGATATCTTAAATTCACGTCTTAAGAAACGAAAATATTTCTTAGATGTATTAGA
ATCTGATTTAATGCAATTTAAACATATATCCTCAAATGAATACATTATTGAAGATTCATTTAAATTATTG
AATTCAGAACAAAAAAACACACTTTTAAAAAGTTACAAATATATAAAAGAATCAGTAGAAAATGATATTA
AATTTGCACAGGAAGGTATAAGTTATTATGAAAAGGTTTTAGCGAAATATAAGGATGATTTAGAATCAAT
TAAAAAAGTTATCAAAGAAGAAAAGGAGTTCCCATCATCACCACCAACAACACCTCCGTCACCAGCAAAA
ACAGACGAACAAAAGAAGGAAAGTAAGTTCCTTCCATTTTTAACAAACATTGAGACCTTATACAATAACT
TAGTTAATAAAATTGACGATTACTTAATTAACTTAAAGGCAAAGATTAACGATTGTAATGTTGAAAAAGA
TGAAGCACATGTTAAAATAACTAAACTTAGTGATTTAAAAGCAATTGATGACAAAATAGATCTTTTTAAA
AACCATAACGACTTCGAAGCAATTAAAAAATTGATAAATGATGATACGAAAAAAGATATGCTTGGCAAAT
TACTTAGTACAGGATTAGTTCAAAATTTTCCTAATACAATAATATCAAAATTAATTGAAGGAAAATTCCA
AGATATGTTAAACATTTCACAACACCAATGCGTAAAAAAACAATGTCCAGAAAATTCTGGATGTTTCAGA
CATTTAGATGAAAGAGAAGAATGTAAATGTTTATTAAATTACAAACAAGAAGGTGATAAATGTGTTGAAA
ATCCAAATCCTACTTGTAACGAAAATAATGGTGGATGTGATGCAGATGCCAAATGTACCGAAGAAGATTC
AGGTAGCAACGGAAAGAAAATCACATGTGAATGTACTAAACCTGATTCTTATCCACTTTTCGATGGTATT
TTCTGCAGTTCCTCTAACTTCTTAGGAATATCATTCTTATTAATACTCATGTTAATATTATACAGTTTCA
TTTAA

>AB502491.1 Plasmodium falciparum msp1 gene for merozoite surface protein-1, complete cds, isolate: Tz93-048
ATGAAGATCATATTCTTTTTATGTTCATTTCTTTTTTTTATTATAAATACACAATGTGTAACACATGAAA
GTTATCAAGAACTTGTCAAAAAACTAGAAGCTTTAGAAGATGCAGTATTGACAGGTTATAGTTTATTTCA
AAAGGAAAAAATGGTATTAAATGAAGAAGAAATTACTACAAAAGGTGCAAGTGCTCAAAGTGGTGCAAGT
GCTCAAAGTGGTGCAAGTGCTCAAAGTGGTGCAAGTGCTCAAAGTGGTGCAAGTGCTCAAAGTGGTACAA
GTGGTCCAAGTGGTACAAGTCCATCATCTCGTTCAAACACTTTACCTCGTTCAAATACTTCATCTGGTGC
AAGCCCTCCAGCTGATGCAAGCGATTCAGATGCTAAATCTTACGCTGATTTAAAACACAGAGTACGAAAT
TACTTGTTCACTATTAAAGAACTCAAATATCCCGAACTCTTTGATTTAACCAATCATATGTTAACTTTGT
GTGATAATATTCATGGTTTCAAATATTTAATTGATGGATATGAAGAAATTAATGAATTATTATATAAATT
AAACTTTTATTTTGATTTATTAAGAGCAAAATTAAATGATGTATGTGCTAATGATTATTGTCAAATACCT
TTCAATCTTAAAATTCGTGCAAATGAATTAGACGTACTTAAAAAACTTGTGTTCGGATATAGAAAACCAT
TAGACAATATTAAAGATAATGTAGGAAAAATGGAAGATTACATTAAAAAAAATAAAACAACCATAGCAAA
TATAAATGAATTAATTGAAGGAAGTAAGAAAACAATTGATCAAAATAAGAATGCAGATAATGAAGAAGGA
AAAAAAAAATTATACCAAGCTCAATATGATCTTTCTATTTACAATAAACAATTAGAAGAAGCACATAATT
TAATAAGCGTTTTAGAAAAACGTATTGACACTTTAAAAAAAAATGAAAACATAAAGAAATTACTTGAAGA
TATAGATAAAATTAAAACAGATGCCGAAAAACTCACTACTGGAAGTAAACCAAATACTCTCCTTGATAAG
AACAAAAAAATCGAGGAACACGAAGAAAAAATAAAAGAAATTGCCAAAACTATTAAATTTAACATTGATA
GTTTATTTACTGATCCACTTGAATTAGAATATTATTTAAGAGAAAAAAATAAAAAAGTTGATGTAACACC
TAAATCACAAGATCCTACGAAATCTGTTCAAATACCAAAAGTTCCTTATCCAAATGGTATTGTATATCCT
TTACCACTCACTGATATTCATAATTCATTAGCTGCAGATAATGATAAAAATTCATATGGTGATTTAATGA
ATCCTGATACTAAAGAAAAAATTAATGAAAAAATTATTACAGATAATAAGGAAAGAAAAATATTCATTAA
TAACATTAAAAAACAAATTGATTTAGAAGAAAAAAACATTAATCACACAAAAGAACAAAATAAAAAATTA
CTTGAAGATTATGAAAAGTCAAAAAAGGATTATGAAGAATTACTTGAAAAATTTTATGAAATGAAATTTA
ATAATAATTTTGACAAAGATGTCGTAGATAAAATATTCAGTGCAAGATATACATATAATGTTGAAAAACA
AAGATATAATAATAAATTTTCATCCTCTAATAATTCTGTATATAATGTTCAAAAATTAAAAAAGGCTCTT
TCATATCTTGAAGATTATTCTTTAAGAAAAGGAATTTCTGAAAAAGATTTTAATCATTATTATACTTTGA
AAACTGGCCTCGAAGCTGATATAAAAAAATTAACAGAAGAAATAAAGAGTAGTGAAAACAAAATTCTAGA
AAAAAATTTTAAAGGACTAACACATTCAGCAAATGCTTCCTTAGAAGTATATGATATTGTAAAATTACAA
GTACAAAAAGTTTTATTAATTAAAAAAATAGAAGACTTAAGAAAGATAGAATTATTTTTAAAAAATGCAC
AACTAAAAGATAGTATTCATGTACCAAATATTTATAAACCACAAAATAAACCAGAACCATATTATTTAAT
TGTATTAAAAAAAGAAGTAGATAAATTAAAAGAATTTATACCAAAAGTAAAAGACATGTTAAAGAAAGAA
CAAGCTGTCTTATCAAGTATTACACAACCTTTAGTTGCAGCAAGCGAAACAACTGAAGATGGGGGTCACT
CCACACACACATTATCCCAATCAGGAGAAACAGAAGTAACAGAAGAAACAGAAGAAACAGAAGAAACAGT
AGGACACACAACAACGGTAACAATAACATTACCACCAACACAACCATCACCACCAAAAGAAGTAAAAGTT
GTTGAAAATTCAATAGAACATAAGAGTAATGACAATTCACAAGCCTTGACAAAAACAGTTTATCTAAAGA
AATTAGATGAATTTTTAACTAAATCATATATATGTCATAAATATATTTTAGTATCAAACTCTAGTATGGA
CCAAAAATTATTAGAGGTATATAATCTTACTCCAGAAGAAGAAAATGAATTAAAATCATGTGATCCATTA
GATTTATTATTTAATATTCAAAATAACATACCTGCTATGTATTCATTATATGATAGTATGAACAATGATT
TACAACATCTCTTTTTTGAATTATATCAAAAGGAAATGATTTATTATTTACATAAACTAAAAGAGGAAAA
TCACATCAAAAAATTATTAGAGGAGCAAAAACAAATAACTGGAACATCATCTACATCCAGTCCTGGAAAT
ACAACCGTAAATACTGCTCAATCCGCAACTCACAGTAATTCCCAAAACCAACAATCAAATGCATCCTCTA
CCAATACCCAAAATGGTGTAGCTGTATCATCTGGTCCTGCTGTAGTTGAAGAAAGTCATGATCCCTTAAC
AGTATTGTCTATTAGTAACGATTTGAAAGGTATTGTTAGTCTCTTAAATCTTGGAAATAAAACTAAAGTA
CCTAATCCATTAACCATTTCTACAACAGAGATGGAAAAATTTTATGAGAATATTTTAAAAAATAATGATA
CCTATTTTAATGATGATATCAAACAATTCGTAAAATCTAATTCAAAAGTAATTACAGGTTTGACCGAAAC
ACAAAAAAATGCATTAAATGATGAAATTAAAAAATTAAAAGATACTTTACAGTTATCATTTGATTTATAT
AATAAATATAAATTAAAATTAGATAGATTATTTAATAAGAAAAAAGAACTTGGCCAAGACAAAATGCAAA
TTAAAAAACTTACTTTATTAAAAGAACAATTAGAATCAAAATTGAATTCACTTAATAACCCACATAATGT
ATTACAAAACTTTTCTGTTTTCTTTAACAAAAAAAAAGAAGCTGAAATAGCAGAAACTGAAAACACATTA
GAAAACACAAAAATATTATTGAAACATTATAAAGGACTTGTTAAATATTATAATGGTGAATCATCTCCAT
TAAAAACTTTAAGTGAAGTATCAATTCAAACAGAAGATAATTATGCCAATTTAGAAAAATTTAGAGTATT
AAGTAAAATAGATGGAAAACTCAATGATAATTTACATTTAGGAAAGAAAAAATTATCTTTCTTATCAAGT
GGATTACATCATTTAATTACTGAATTAAAAGAAGTAATAAAAAATAAAAATTATACAGGTAATTCTCCAA
GTGAAAATAATAAGAAAGTTAACGAAGCTTTAAAATCTTACGAAAATTTTCTCCCAGAAGCAAAAGTTAC
AACAGTTGTAACTCCACCTCAACCAGATGTAACTCCATCTCCATTATCTGTAAGGGTAAGTGGTAGTTCA
GGATCCACAAAAGAAGAAACACAAATACCAACTTCAGGCTCTTTATTAACAGAATTACAACAAGTAGTAC
AATTACAAAATTATGACGAAGAAGATGATTCCTTAGTTGTATTACCCATTTTTGGAGAATCCGAAGATAA
TGACGAATATTTAGATCAAGTAGTAACTGGAGAAGCAATATCTGTCACAATGGATAATATCCTCTCAGGA
TTTGAAAATGAATATGATGTTATATATTTAAAACCTTTAGCTGGAGTATATAGAAGCTTAAAAAAACAAA
TTGAAAAAAACATTTTTACATTTAATTTAAATTTGAACGATATCTTAAATTCACGTCTTAAGAAACGAAA
ATATTTCTTAGATGTATTAGAATCTGATTTAATGCAATTTAAACATATATCCTCAAATGAATACATTATT
GAAGATTCATTTAAATTATTGAATTCAGAACAAAAAAACACACTTTTAAAAAGTTACAAATATATAAAAG
AATCAGTAGAAAATGATATTAAATTTGCACAGGAAGGTATAAGTTATTATGAAAAGGTTTTAGCGAAATA
TAAGGATGATTTAGAATCAATTAAAAAAGTTATCAAAGAAGAAAAGGAGTTCCCATCATCACCACCAACA
ACACCTCCGTCACCAGCAAAAACAGACGAACAAAAGAAGGAAAGTAAGTTCCTTCCATTTTTAACAAACA
TTGAGACCTTATACAATAACTTAGTTAATAAAATTGACGATTACTTAATTAACTTAAAGGCAAAGATTAA
CGATTGTAATGTTGAAAAAAATGAAGCACATGTTAAAATAACTAAACTTAGTGATTTAAAAGCAATTGAT
GACAAAATAGATCTTTTTAAAAACCATAACGACTTCGAAGCAATTAAAAAATTGATAAATGATGATACGA
AAAAAGATATGCTTGGCAAATTACTTAGTACAGGATTAGTTCAAAATTTTCCTAATACAATAATATCAAA
ATTAATTGAAGGAAAATTCCAAGATATGTTAAACATTTCACAACACCAATGCGTAAAAAAACAATGTCCA
GAAAATTCTGGATGTTTCAGACATTTAGATGAAAGAGAAGAATGTAAATGTTTATTAAATTACAAACAAG
AAGGTGATAAATGTGTTGAAAATCCAAATCCTACTTGTAACGAAAATAATGGTGGATGTGATGCAGATGC
CAAATGTACCGAAGAAGATTCAGGTAGCAACGGAAAGAAAATCACATGTGAATGTACTAAACCTGATTCT
TATCCACTTTTCGATGGTATTTTCTGCAGTTCCTCTAACTTCTTAGGAATATCATTCTTATTAATACTCA
TGTTAATATTATACAGTTTCATTTAA

>AB502492.1 Plasmodium falciparum msp1 gene for merozoite surface protein-1, complete cds, isolate: Tz93-050
ATGAAGATCATATTCTTTTTATGTTCATTTCTTTTTTTTATTATAAATACACAATGTGTAACACATGAAA
GTTATCAAGAACTTGTCAAAAAACTAGAAGCTTTAGAAGATGCAGTATTGACAGGTTATGGTTTATTTCA
TAAGGAAAAAATGATCTTAAATGAAGAAGAAATTACTACAAAAGGTGCAAGTGCTCAAAGTGGTACAAGT
GGTACAAGTGGTACAAGTGGTACAAGTGGTACAAGTGGTACAAGTGCTCAAAGTGGTACAAGTGGTACAA
GTGCTCAAAGTGGTACAAGTGGTACAAGTGGTCCAAGTGGTACAAGTCCATCATCTCGTTCAAACACTTT
ACCTCGTTCAAATACTTCATCTGGTGCAAGCCCTCCAGCTGATGCAAGCGATTCAGATGCTAAATCTTAC
GCTGATTTAAAACACAGAGTACGAAATTACTTGTTCACTATTAAAGAACTCAAATATCCCGAACTCTTTG
ATTTAACCAATCATATGTTAACTTTGTGTGATAATATTCATGGTTTCAAATATTTAATTGATGGATATGA
AGAAATTAATGAATTATTATATAAATTAAACTTTTATTTTGATTTATTAAGAGCAAAATTAAATGATGTA
TGTGCTAATGATTATTGTCAAATACCTTTCAATCTTAAAATTCGTGCAAATGAATTAGACGTACTTAAAA
AACTTGTGTTCGGATATAGAAAACCATTAGACAATATTAAAGATAATGTAGGAAAAATGGAAGATTACAT
TAAAAAAAATAAAACAACCATAGCAAATATAAATGAATTAATTGAAGGAAGTAAGAAAACAATTGATCAA
AATAAGAATGCAGATAATGAAGAAGGAAAAAAAAAATTATACCAAGCTCAATATGATCTTTCTATTTACA
ATAAACAATTAGAAGAAGCACATAATTTAATAAGCGTTTTAGAAAAACGTATTGACACTTTAAAAAAAAA
TGAAAACATAAAGAAATTACTTGAAGATATAGATAAAATTAAAACAGATGCCGAAAAACCCACTACTGGA
AGTAAACCAAATACTCTCCTTGATAAGAACAAAAAAATCGAGGAACACGAAGAAAAAATAAAAGAAATTG
CCAAAACTATTAAATTTAACATTGATAGTTTATTTACTGATCCACTTGAATTAGAATATTATTTAAGAGA
AAAAAATAAAAAAGTTGATGTAACACCTAAATCACAAGATCCTACGAAATCTGTTCAAATACCAAAAGTT
CCTTATCCAAATGGTATTGTATATCCTTTACCACTCACTGATATTCATAATTCATTAGCTGCAGATAATG
ATAAAAATTCATATGGTGATTTAATGAATCCTGATACTAAAGAAAAAATTAATGAAAAAATTATTACAGA
TAATAAGGAAAGAAAAATATTCATTAATAACATTAAAAAACAAATTGATTTAGAAGAAAAAAACATTAAT
CACACAAAAGAACAAAATAAAAAATTACTTGAAGATTATGAAAAGTCAAAAAAGGATTATGAAGAATTAC
TTGAAAAATTTTATGAAATGAAATTTAATAATAATTTTGACAAAGATGTCGTAGATAAAATATTCAGTGC
AAGATATACATATAATGTTGAAAAACAAAGATATAATAATAAATTTTCATCCTCTAATAATTCTGTATAT
AATGTTCAAAAATTAAAAAAGGCTCTTTCATATCTTGAAGATTATTCTTTAAGAAAAGGAATTTCTGAAA
AAGATTTTAATCATTATTATACTTTGAAAACTGGCCTCGAAGCTGATATAAAAAAATTAACAGAAGAAAT
AAAGAGTAGTGAAAACAAAATTCTAGAAAAAAATTTTAAAGGACTAACACATTCAGCAAATGATTCCTTA
GAAGTATCTGATATTGTAAAATTACAAGTACAAAAAGTTTTATTAATTAAAAAAATAGAAGACTTAAGAA
AGATAGAATTATTTTTAAAAAATGCACAACTAAAAGATAGTATTCATGTACCAAATATTTATAAACCACA
AAATAAACCAGAACCATATTATTTAATTGTATTAAAAAAAGAAGTAGATAAATTAAAAGAATTTATACCA
AAAGTAAAAGACATGTTAAAGAAAGAACAAGCTGTCTTATCAAGTATTACACAACCTTTAGTTGCAGCAA
GCGAAACAACTGAAGATGGGGGTCACTCCACACACACATTATCCCAATCAGGAGAAACAGAAGTAACAGA
AGAAACAGAAGAAACAGAAGAAACAGTAGGACACACAACAACGGTAACAATAACATTACCACCAAAAGAA
GTAAAAGTTGTTGAAAATTCAATAGAACATAAGAGTAATGACAATTCACAAGCCTTGACAAAAACAGTTT
ATCTAAAGAAATTAGATGAATTTTTAACTAAATCATATATATGTCATAAATATATTTTAGTATCAAACTC
TAGTATGGACCAAAAATTATTAGAGGTATATAATCTTACTCCAGAAGAAGAAAATGAATTAAAATCATGT
GATCCATTAGATTTATTATTTAATATTCAAAATAACATACCTGCTATGTATTCATTATATGATAGTATGA
ACAATGATTTACAACATCTCTTTTTTGAATTATATCAAAAGGAAATGATTTATTATTTACATAAACTAAA
AGAGGAAAATCACATCAAAAAATTATTAGAGGAGCAAAAACAAATAACTGGAACATCATCTACATCCAGT
CCTGGAAATACAACCGTAAATACTGCTCAATCCGCAACTCACAGTAATTCCCAAAACCAACAATCAAATG
CATCCTCTACCAATACCCAAAATGGTGTAGCTGTATCATCTGGTCCTGCTGTAGTTGAAGAAAGTCATGA
TCCCTTAACAGTATTGTCTATTAGTAACGATTTGAAAGGTATTGTTAGTCTCTTAAATCTTGGAAATAAA
ACTAAAGTACCTAATCCATTAACCATTTCTACAACAGAGATGGAAAAATTTTATGAGAATATTTTAAAAA
ATAATGATACCTATTTTAATGATGATATCAAACAATTCGTAAAATCTAATTCAAAAGTAATTACAGGTTT
GACCGAAACACAAAAAAATGCATTAAATGATGAAATTAAAAAATTAAAAGATACTTTACAGTTATCATTT
GATTTATATAATAAATATAAATTAAAATTAGATAGATTATTTAATAAGAAAAAAGAACTTGGCCAAGACA
AAATGCAAATTAAAAAACTTACTTTATTAAAAGAACAATTAGAATCAAAATTGAATTCACTTAATAACCC
ACATAATGTATTACAAAACTTTTCTGTTTTCTTTAACAAAAAAAAAGAAGCTGAAATAGCAGAAACTGAA
AACACATTAGAAAACACAAAAATATTATTGAAACATTATAAAGGACTTGTTAAATATTATAATGGTGAAT
CATCTCCATTAAAAACTTTAAGTGAAGTATCAATTCAAACAGAAGATAATTATGCCAATTTAGAAAAATT
TAGAGTATTAAGTAAAATAGATGGAAAACTCAATGATAATTTACATTTAGGAAAGAAAAAATTATCTTTC
TTATCAAGTGGATTACATCATTTAATTACTGAATTAAAAGAAGTAATAAAAAATAAAAATTATACAGGTA
ATTCTCCAAGTGAAAATAATAAGAAAGTTAACGAAGCTTTAAAATCTTACGAAAATTTTCTCCCAGAAGC
AAAAGTTACAACAGTTGTAACTCCACCTCAACCAGATGTAACTCCATCTCCATTATCTGTAAGGGTAAGT
GGTAGTTCAGGATCCACAAAAGAAGAAACACAAATACCAACTTCAGGCTCTTTATTAACAGAATTACAAC
AAGTAGTACAATTACAAAATTATGACGAAGAAGATGATTCCTTAGTTGTATTACCCATTTTTGGAGAATC
CGAAGATAATGACGAATATTTAGATCAAGTAGTAACTGGAGAAGCAATATCTGTCACAATGGATAATATC
CTCTCAGGATTTGAAAATGAATATGATGTTATATATTTAAAACCTTTAGCTGGAGTATATAGAAGCTTAA
AAAAACAAATTGAAAAAAACATTTTTACATTTAATTTAAATTTGAACGATATCTTAAATTCACGTCTTAA
GAAACGAAAATATTTCTTAGATGTATTAGAATCTGATTTAATGCAATTTAAACATATATCCTCAAATGAA
TACATTATTGAAGATTCATTTAAATTATTGAATTCAGAACAAAAAAACACACTTTTAAAAAGTTACAAAT
ATATAAAAGAATCAGTAGAAAATGATATTAAATTTGCACAGGAAGGTATAAGTTATTATGAAAAGGTTTT
AGCGAAATATAAGGATGATTTAGAATCAATTAAAAAAGTTATCAAAGAAGAAAAGGAGAAGTTCCCATCA
TCACCACCAACAACACCTCCGTCACCAGCAAAAACAGACGAACAAAAGAAGGAAAGTAAGTTCCTTCCAT
TTTTAACAAACATTGAGACCTTATACAATAACTTAGTTAATAAAATTGACGATTACTTAATTAACTTAAA
GGCAAAGATTAACGATTGTAATGTTGAAAAAGATGAAGCACATGTTAAAATAACTAAACTTAGTGATTTA
AAAGCAATTGATGACAAAATAGATCTTTTTAAAAACCATAACGACTTCGAAGCAATTAAAAAATTGATAA
ATGATGATACGAAAAAAGATATGCTTGGCAAATTACTTAGTACAGGATTAGTTCAAAATTTTCCTAATAC
AATAATATCAAAATTAATTGAAGGAAAATTCCAAGATATGTTAAACATTTCACAACACCAATGCGTAAAA
AAACAATGTCCAGAAAATTCTGGATGTTTCAGACATTTAGATGAAAGAGAAGAATGTAAATGTTTATTAA
ATTACAAACAAGAAGGTGATAAATGTGTTGAAAATCCAAATCCTACTTGTAACGAAAATAATGGTGGATG
TGATGCAGATGCCAAATGTACCGAAGAAGATTCAGGTAGCAACGGAAAGAAAATCACATGTGAATGTACT
AAACCTGATTCTTATCCACTTTTCGATGGTATTTTCTGCAGTTCCTCTAACTTCTTAGGAATATCATTCT
TATTAATACTCATGTTAATATTATACAGTTTCATTTAA

>AB502493.1 Plasmodium falciparum msp1 gene for merozoite surface protein-1, complete cds, isolate: Tz93-051
ATGAAGATCATATTCTTTTTATGTTCATTTCTTTTTTTTATTATAAATACACAATGTGTAACACATGAAA
GTTATCAAGAACTTGTCAAAAAACTAGAAGCTTTAGAAGATGCAGTATTGACAGGTTATAGTTTATTTCA
AAAGGAAAAAATGGTATTAAAGGATGGAGCAAATACTCAAGTTGTTGCAAAGCCTGCAGATGCTGTAAGT
ACTCAAAGTGCTAAAAATCCTCCAGGTGCTACAGTACCTTCAGGTACTGCAAGTACTAAAGGTGCTATAA
GATCTCCAGGTGCTGCAAATCCTTCAGATGATTCAAGTGATTCAGATGCTAAATCTTACGCTGATTTAAA
ACATAGAGTTCAAAATTACTTGTTCACTATTAAAGAACTCAAATATCCCGAACTCTTTGATTTAACCAAT
CATATGTTAACTTTGTGTGATAATATTCATGGTTTCAAATATTTAATTGATGGATATGAAGAAATTAATG
AATTATTATATAAATTAAACTTTTATTTTGATTTATTAAGAGCAAAATTAAATGATGTATGTGCTAATGA
TTATTGTCAAATACCTTTCAATCTTAAAATTCGTGCAAATGAATTAGACGTACTTAAAAAACTTGTGTTC
GGATATAGAAAACCATTAGACAATATTAAAGATAATGTAGGAAAAATGGAAGATTACATTAAAAAAAATA
AAACAACCATAGCAAATATAAATGAATTAATTGAAGGAAGTAAGAAAACAATTGATCAAAATAAGAATGC
AGATAATGAAGAAGGAAAAAAAAAATTATACCAAGCTCAATATGATCTTTCTATTTACAATAAACAATTA
GAAGAAGCACATAATTTAATAAGCGTTTTAGAAAAACGTATTGACACTTTAAAAAAAAATGAAAACATAA
AGAAATTACTTGAAGATATAGATAAAATTAAAACAGATGCCGAAAAACCCACTACTGGAAGTAAACCAAA
TACTCTCCTTGATAAGAACAAAAAAATCGAGGAACACGAAGAAAAAATAAAAGAAATTGCCAAAACTATT
AAATTTAACATTGATAGTTTATTTACTGATCCACTTGAATTAGAATATTATTTAAGAGAAAAAAATAAAA
AAGTTGATGTAACACCTAAATCACAAGATCCTACGAAATCTGTTCAAATACCAAAAGTTCCTTATCCAAA
TGGTATTGTATATCCTTTACCACTCACTGATATTCATAATTCATTAGCTGCAGATAATGATAAAAATTCA
TATGGTGATTTAATGAATCCTGATACTAAAGAAAAAATTAATGAAAAAATTATTACAGATAATAAGGAAA
GAAAAATATTCATTAATAACATTAAAAAACAAATTGATTTAGAAGAAAAAAACATTAATCACACAAAAGA
ACAAAATAAAAAATTACTTGAAGATTATGAAAAGTCAAAAAAGGATTATGAAGAATTACTTGAAAAATTT
TATGAAATGAAATTTAATAATAATTTTAACAAAGATGTCGTAGATAAAATGTTCAGTGCAAGATATACAT
ATAATGTTGAAAAACAAAGATATAATAATAAATTTTCATCCTCTAATAATTCTGTATATAATGTTCAAAA
ATTAAAAAAGGCTCTTTCATATCTTGAAGATTATTCTTTAAGAAAAGGAATTTCTGAAAAAGATTTTAAT
CATTATTATACTTTGAAAACTGGCCTCGAAGCTGATATAAAAAAATTAACAGAAGAAATAAAGAGTAGTG
AAAACAAAATTCGAGAAAAAAATTTTAAAGGACTAACACATTCAGCAAATGCTTCCTTAGAAGTATATGA
TATTGTAAAATTACAAGTACAAAAAGTTTTATTAATTAAAAAAATAGAAGACTTAAGAAAGATAGAATTA
TTTTTAAAAAATGCACAACTAAAAGATAGTATTCATGTACCAAATATTTATAAACCACAAAATAAACCAG
AACCATATTATTTAATTGTATTAAAAAAAGAAGTAGATAAATTAAAAGAATTTATACCAAAAGTAAAAGA
CATGTTAAAGAAAGAACAAGCTGTCTTATCAAGTATTACACAACCTTTAGTTGCAGCAAGCGAAACAACT
GAAGATGGGGGTCACTCCACACACACATTATCCCAATCAGGAGAAACAGAAGTAACAGAAGAAACAGTAG
GACACACAACAACGGTAACAATAACATTACCACCAAAAGAAGTAAAAGTTGTTGAAAATTCAATAGAACA
TAAGAGTAATGACAATTCACAAGCCTTGACAAAAACAGTTTATCTAAAGAAATTAGATGAATTTTTAACT
AAATCATATATATGTCATAAATATATTTTAGTATCAAACTCTAGTATGGACCAAAAATTATTAGAGGTAT
ATAATCTTACTCCAGAAGAAAAAAATGAATTAAAATCATGTGATCCATTAGATTTATTATTTAATATTCA
AAATAACATACCTGCTATGTATTCATTATATGATAGTATGAACAATGATTTACAACATCTCTTTTTTGAA
TTATATCAAAAGGAAATGATTTATTATTTACATAAACTAAAAGAGGAAAATCACATCAAAAAATTATTAG
AGGAGCAAAAACAAATAACTGGAACATCATCTACATCCAGTCCTGGAAATACAACCGTAAATACTGCTCA
ATCCGCAACTCACAGTAATTCCCAAAACCAACAATCAAATGCATCCTCTACCAATACCCAAAATGGTGTA
GCTGTATCATCTGGTCCTGCTGTAGTTGAAGAAAGTCATGATCCCTTAACAGTATTGTCTATTAGTAACG
ATTTGAAAGGTATTGTTAGTCTCTTAAATCTTGGAAATAAAACTAAAGTACCTAATCCATTAACCATTTC
TACAACAGAGATGGAAAAATTTTATGAGAATATTTTAAAAAATAATGATACCTATTTTAATGATGATATC
AAACAATTCGTAAAATCTAATTCAAAAGTAATTACAGGTTTGACCGAAACACAAAAAAATGCATTAAATG
ATGAAATTAAAAAATTAAAAGATACTTTACAGTTATCATTTGATTTATATAATAAATATAAATTAAAATT
AGATAGATTATTTAATAAGAAAAAAGAACTTGGCCAAGACAAAATGCAAATTAAAAAACTTACTTTATTA
AAAGAACAATTAGAATCAAAATTGAATTCACTTAATAACCCACATAATGTATTACAAAACTTTTCTGTTT
TCTTTAACAAAAAAAAAGAAGCTGAAATAGCAGAAACTGAAAACACATTAGAAAACACAAAAATATTATT
GAAACATTATAAAGGACTTGTTAAATATTATAATGGTGAATCATCTCCATTAAAAACTTTAAGTGAAGTA
TCAATTCAAACAGAAGATAATTATGCCAATTTAGAAAAATTTAGAGTATTAAGTAAAATAGATGGAAAAC
TCAATGATAATTTACATTTAGGAAAGAAAAAATTATCTTTCTTATCAAGTGGATTACATCATTTAATTAC
TGAATTAAAAGAAGTAATAAAAAATAAAAATTATACAGGTAATTCTCCAAGTGAAAATAATAAGAAAGTT
AACGAAGCTTTAAAATCTTACGAAAATTTTCTCCCAGAAGCAAAAGTTACAACAGTTGTAACTCCACCTC
AACCAGATGTAACTCCATCTCCATTATCTGTAAGGGTAAGTGGTAGTTCAGGATCCACAAAAGAAGAAAC
[truncated: 2,466,755 more chars]
